# Supplementary material
Source: PubMed Central journal article supplement (PMC5463557)

## Supporting Information

### High-potency phenylquinoxalinone CFTR activators

Jung-Ho Son<sup>†</sup>, Jie S. Zhu<sup>†</sup>, Puay-Wah Phuan<sup>‡</sup>, Onur Cil<sup>‡</sup>, Andrew P. Teuthorn<sup>†</sup>, Colton K. Ku<sup>†</sup>, Sujin Lee<sup>‡</sup>, Alan S. Verkman<sup>‡</sup>, Mark J. Kurth<sup>†\*</sup>

<sup>†</sup>Department of Chemistry, University of California, Davis, CA, 95616, USA

<sup>‡</sup>Departments of Medicine & Physiology, University of California San Francisco, CA 94143, USA

#### Table of Contents

<sup>1</sup>H and <sup>13</sup>C NMR spectra for assayed compounds (pgs S2 - S73)

S2

1a, <sup>1</sup>H NMR, CDCl<sub>3</sub>

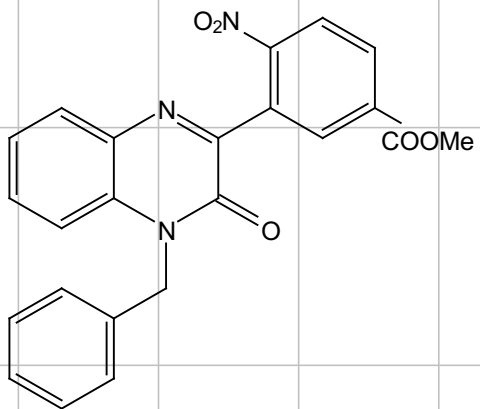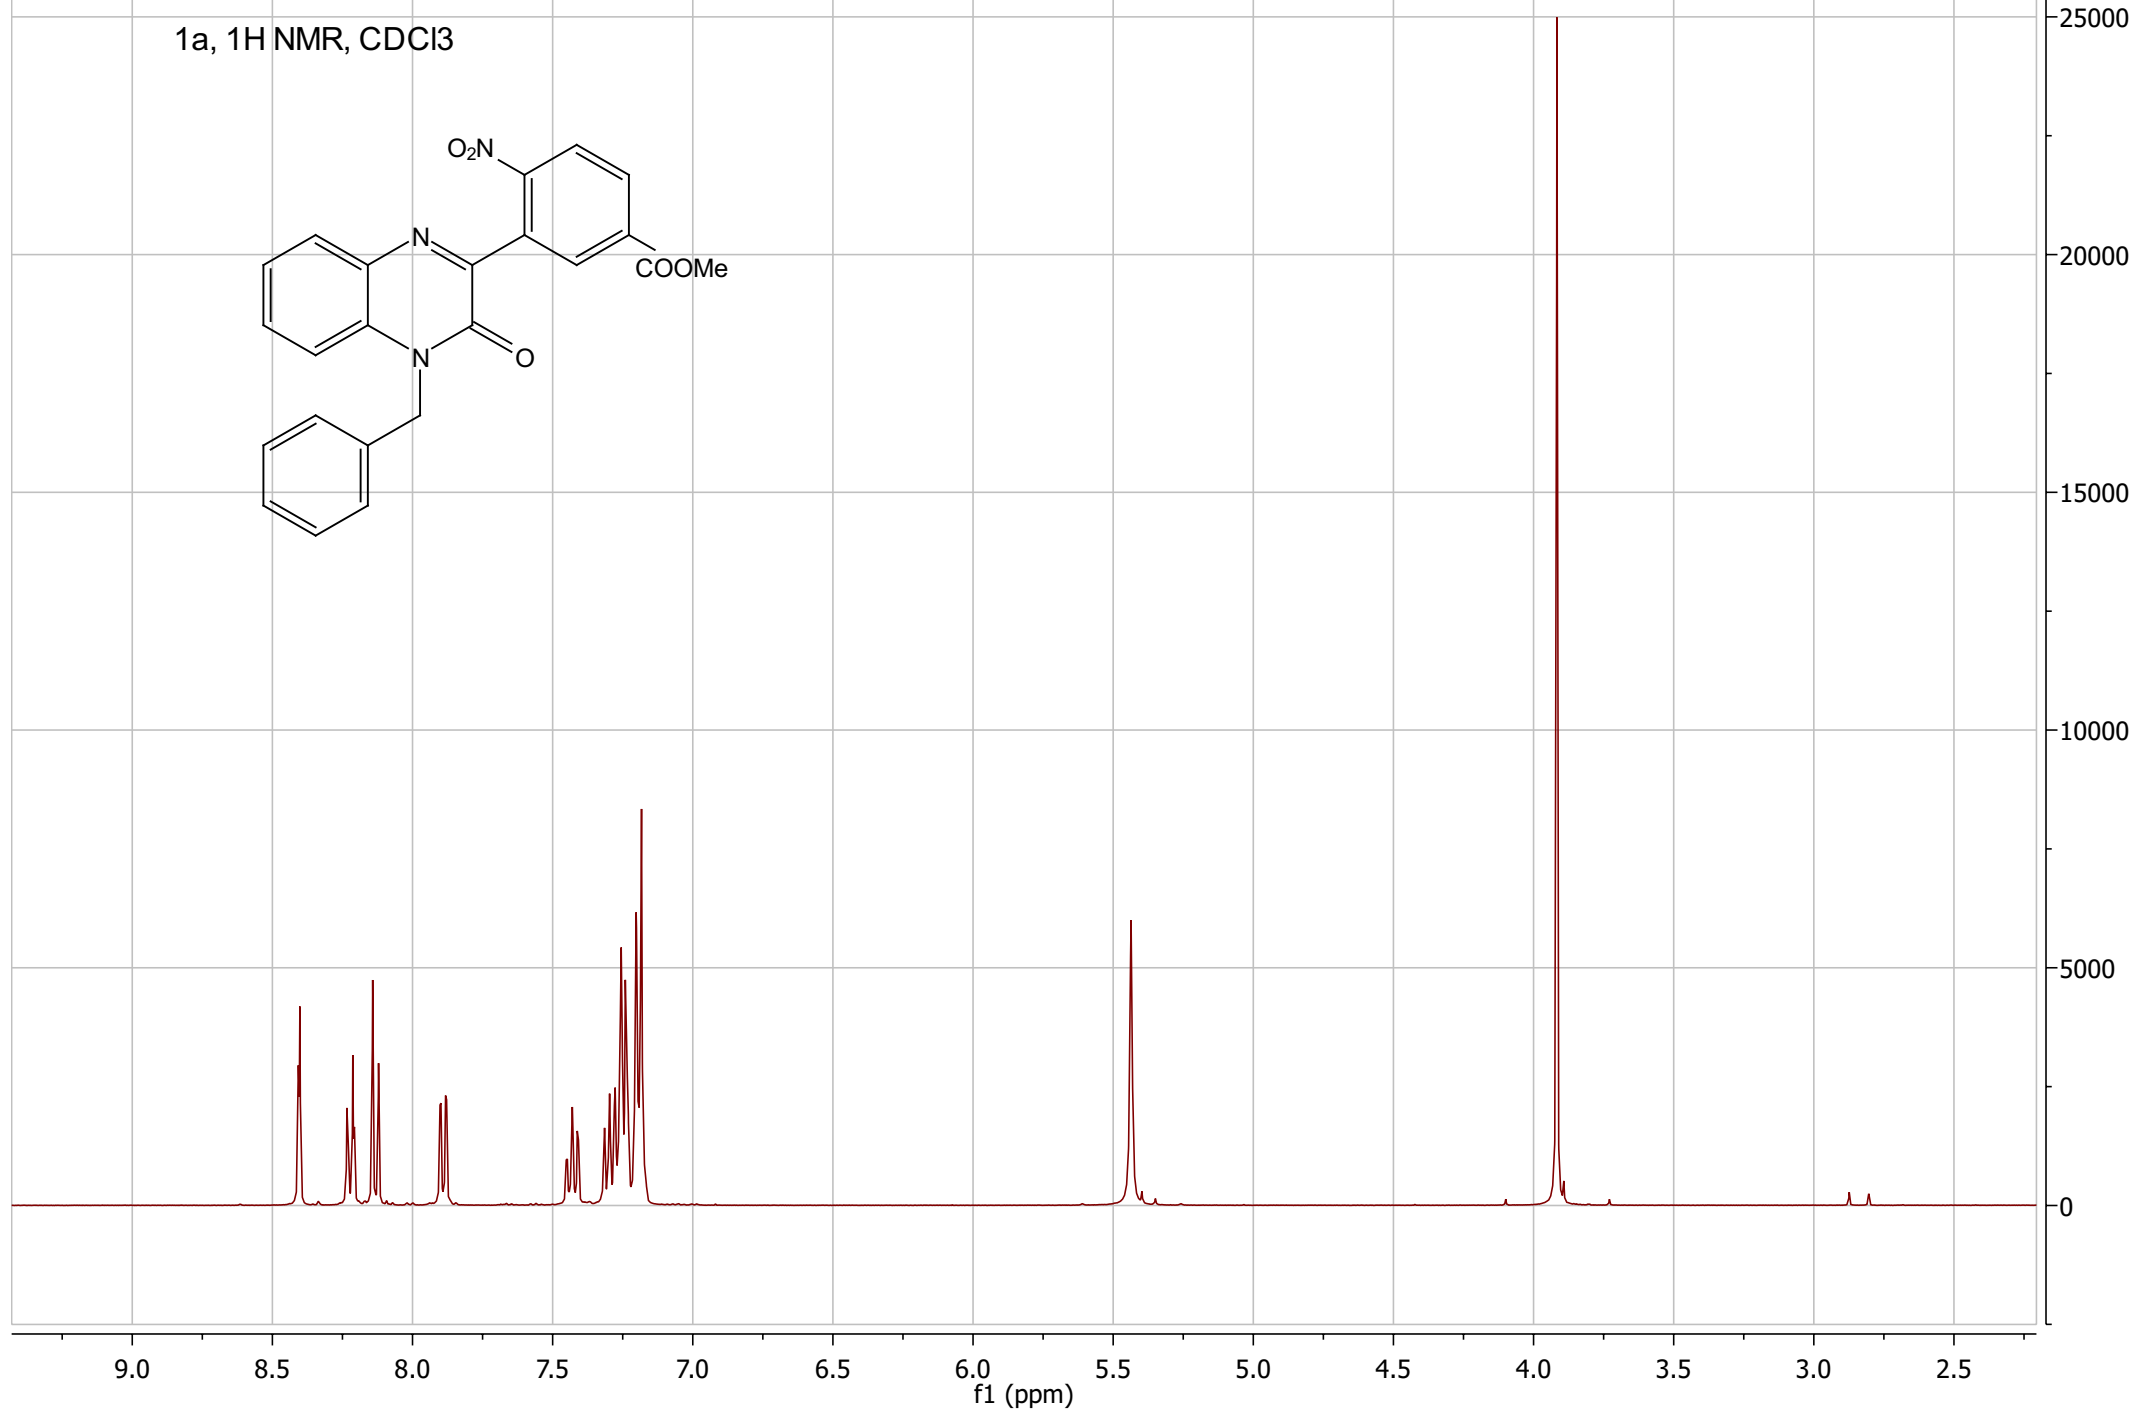

S3

1a, <sup>13</sup>C NMR, CDCl<sub>3</sub>

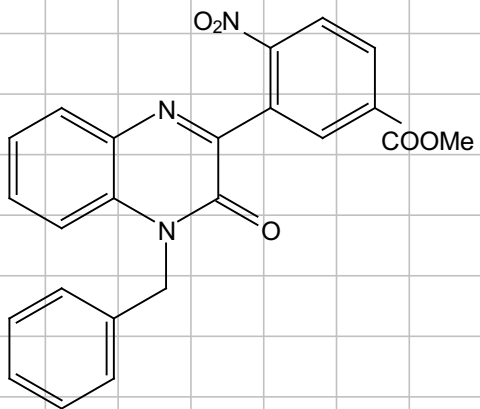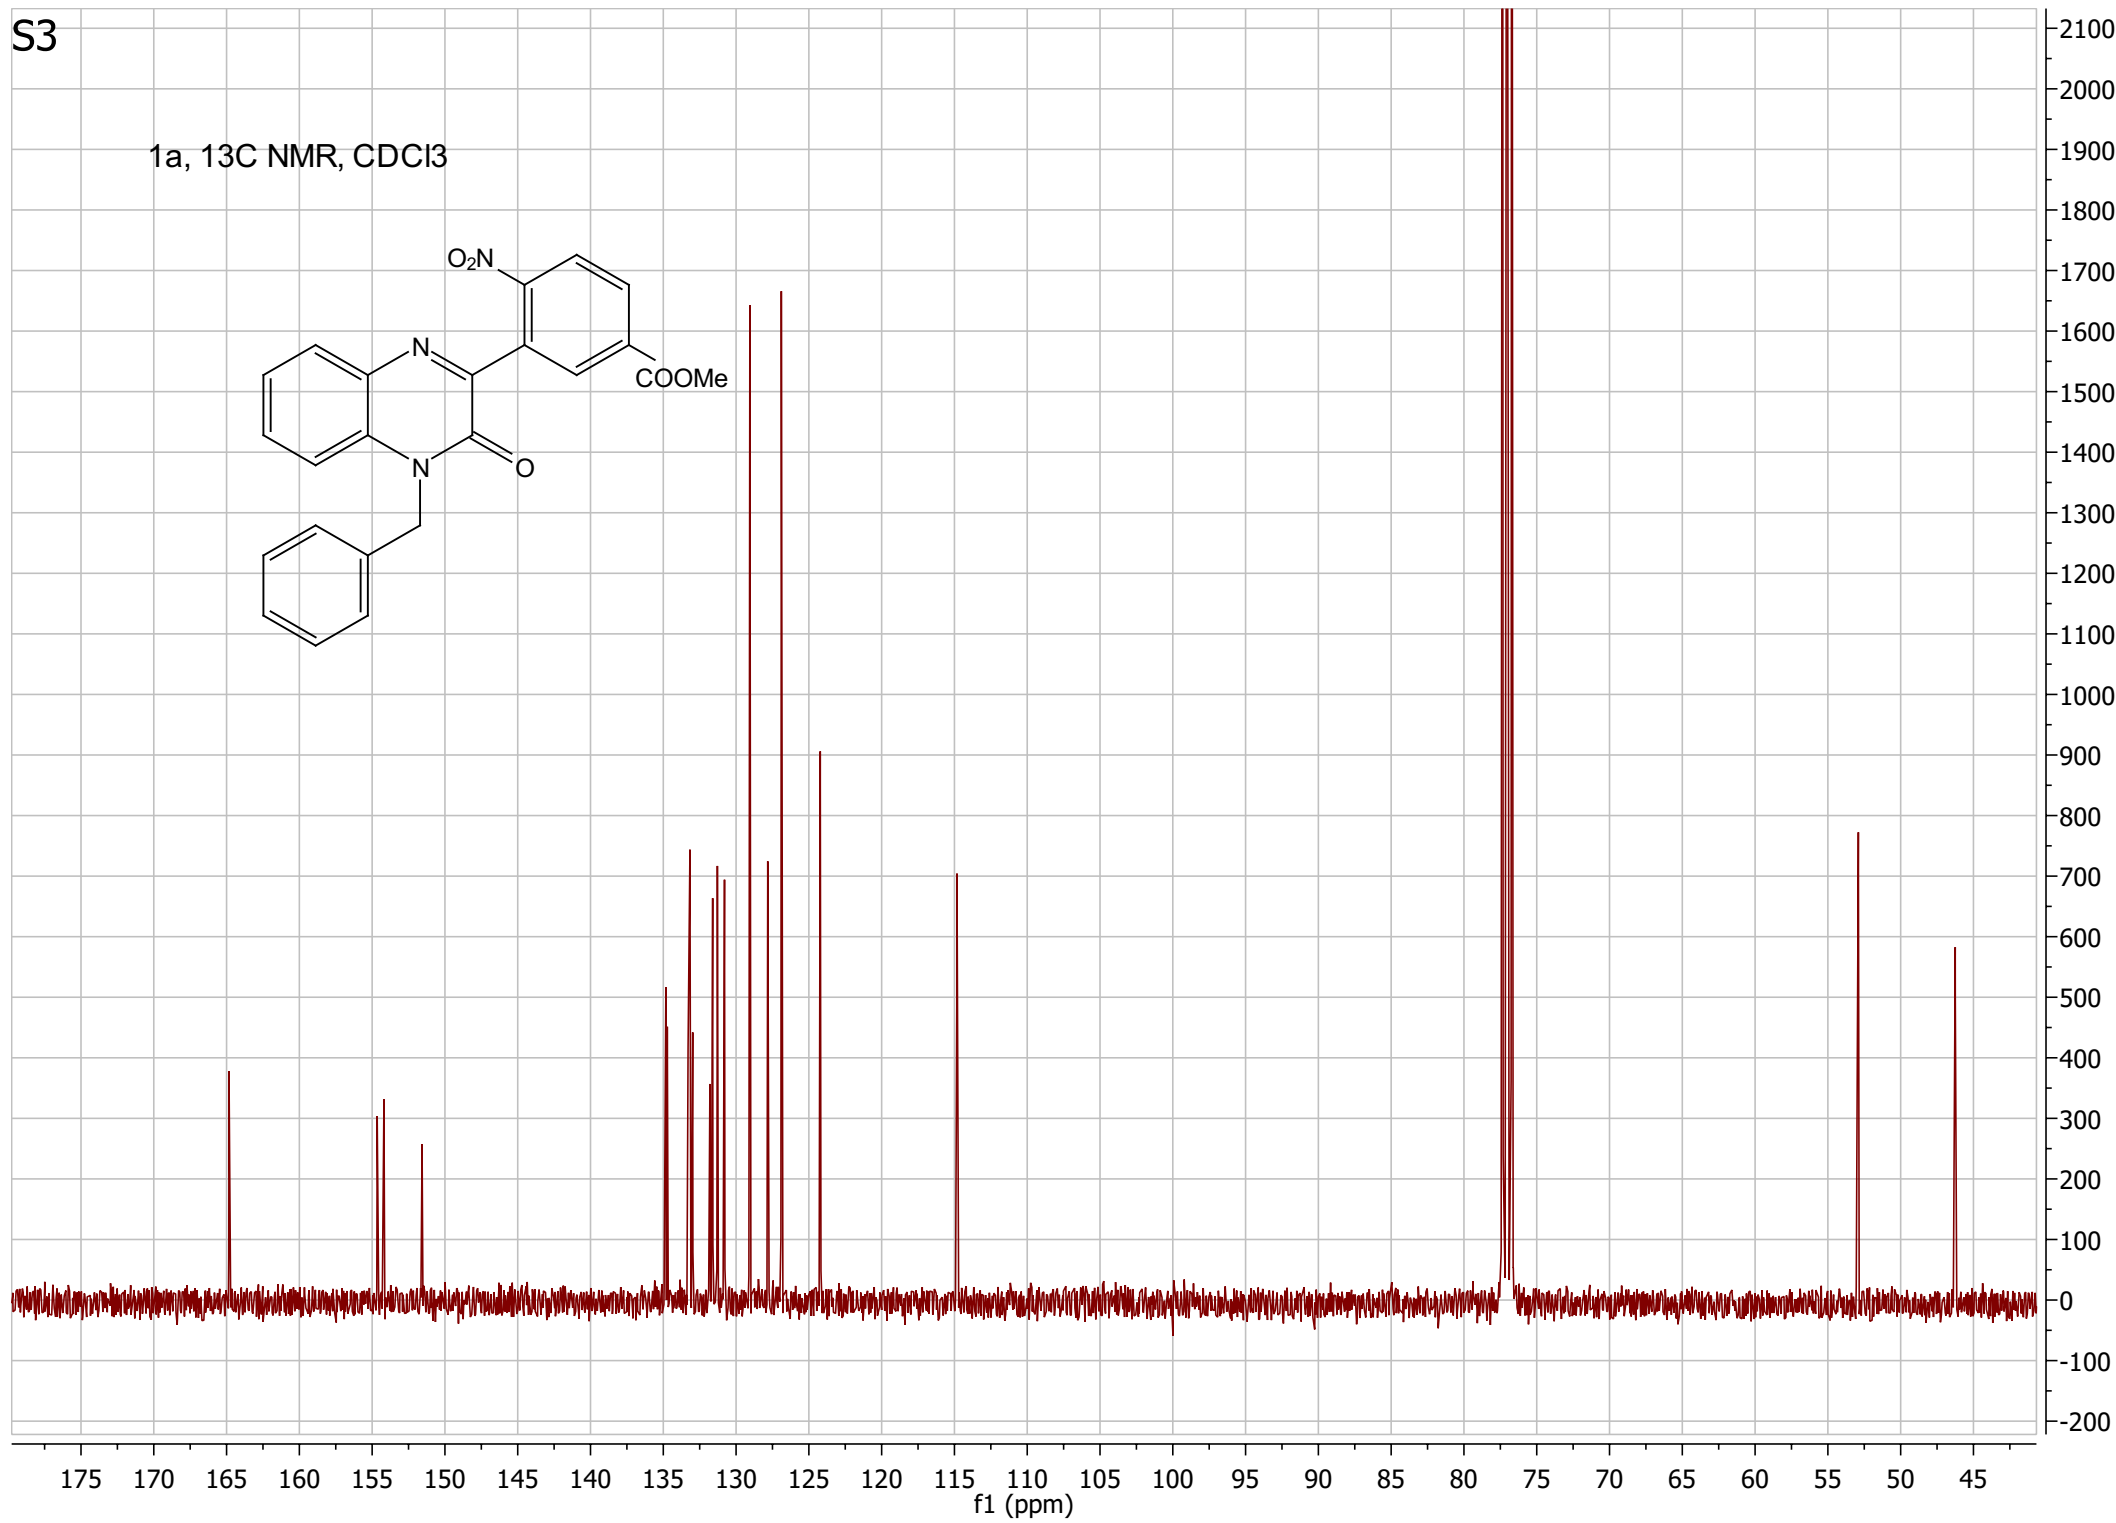

S4

1b, <sup>1</sup>H NMR, DMSO-d<sub>6</sub>

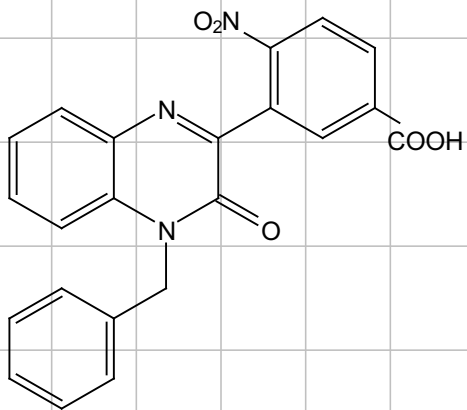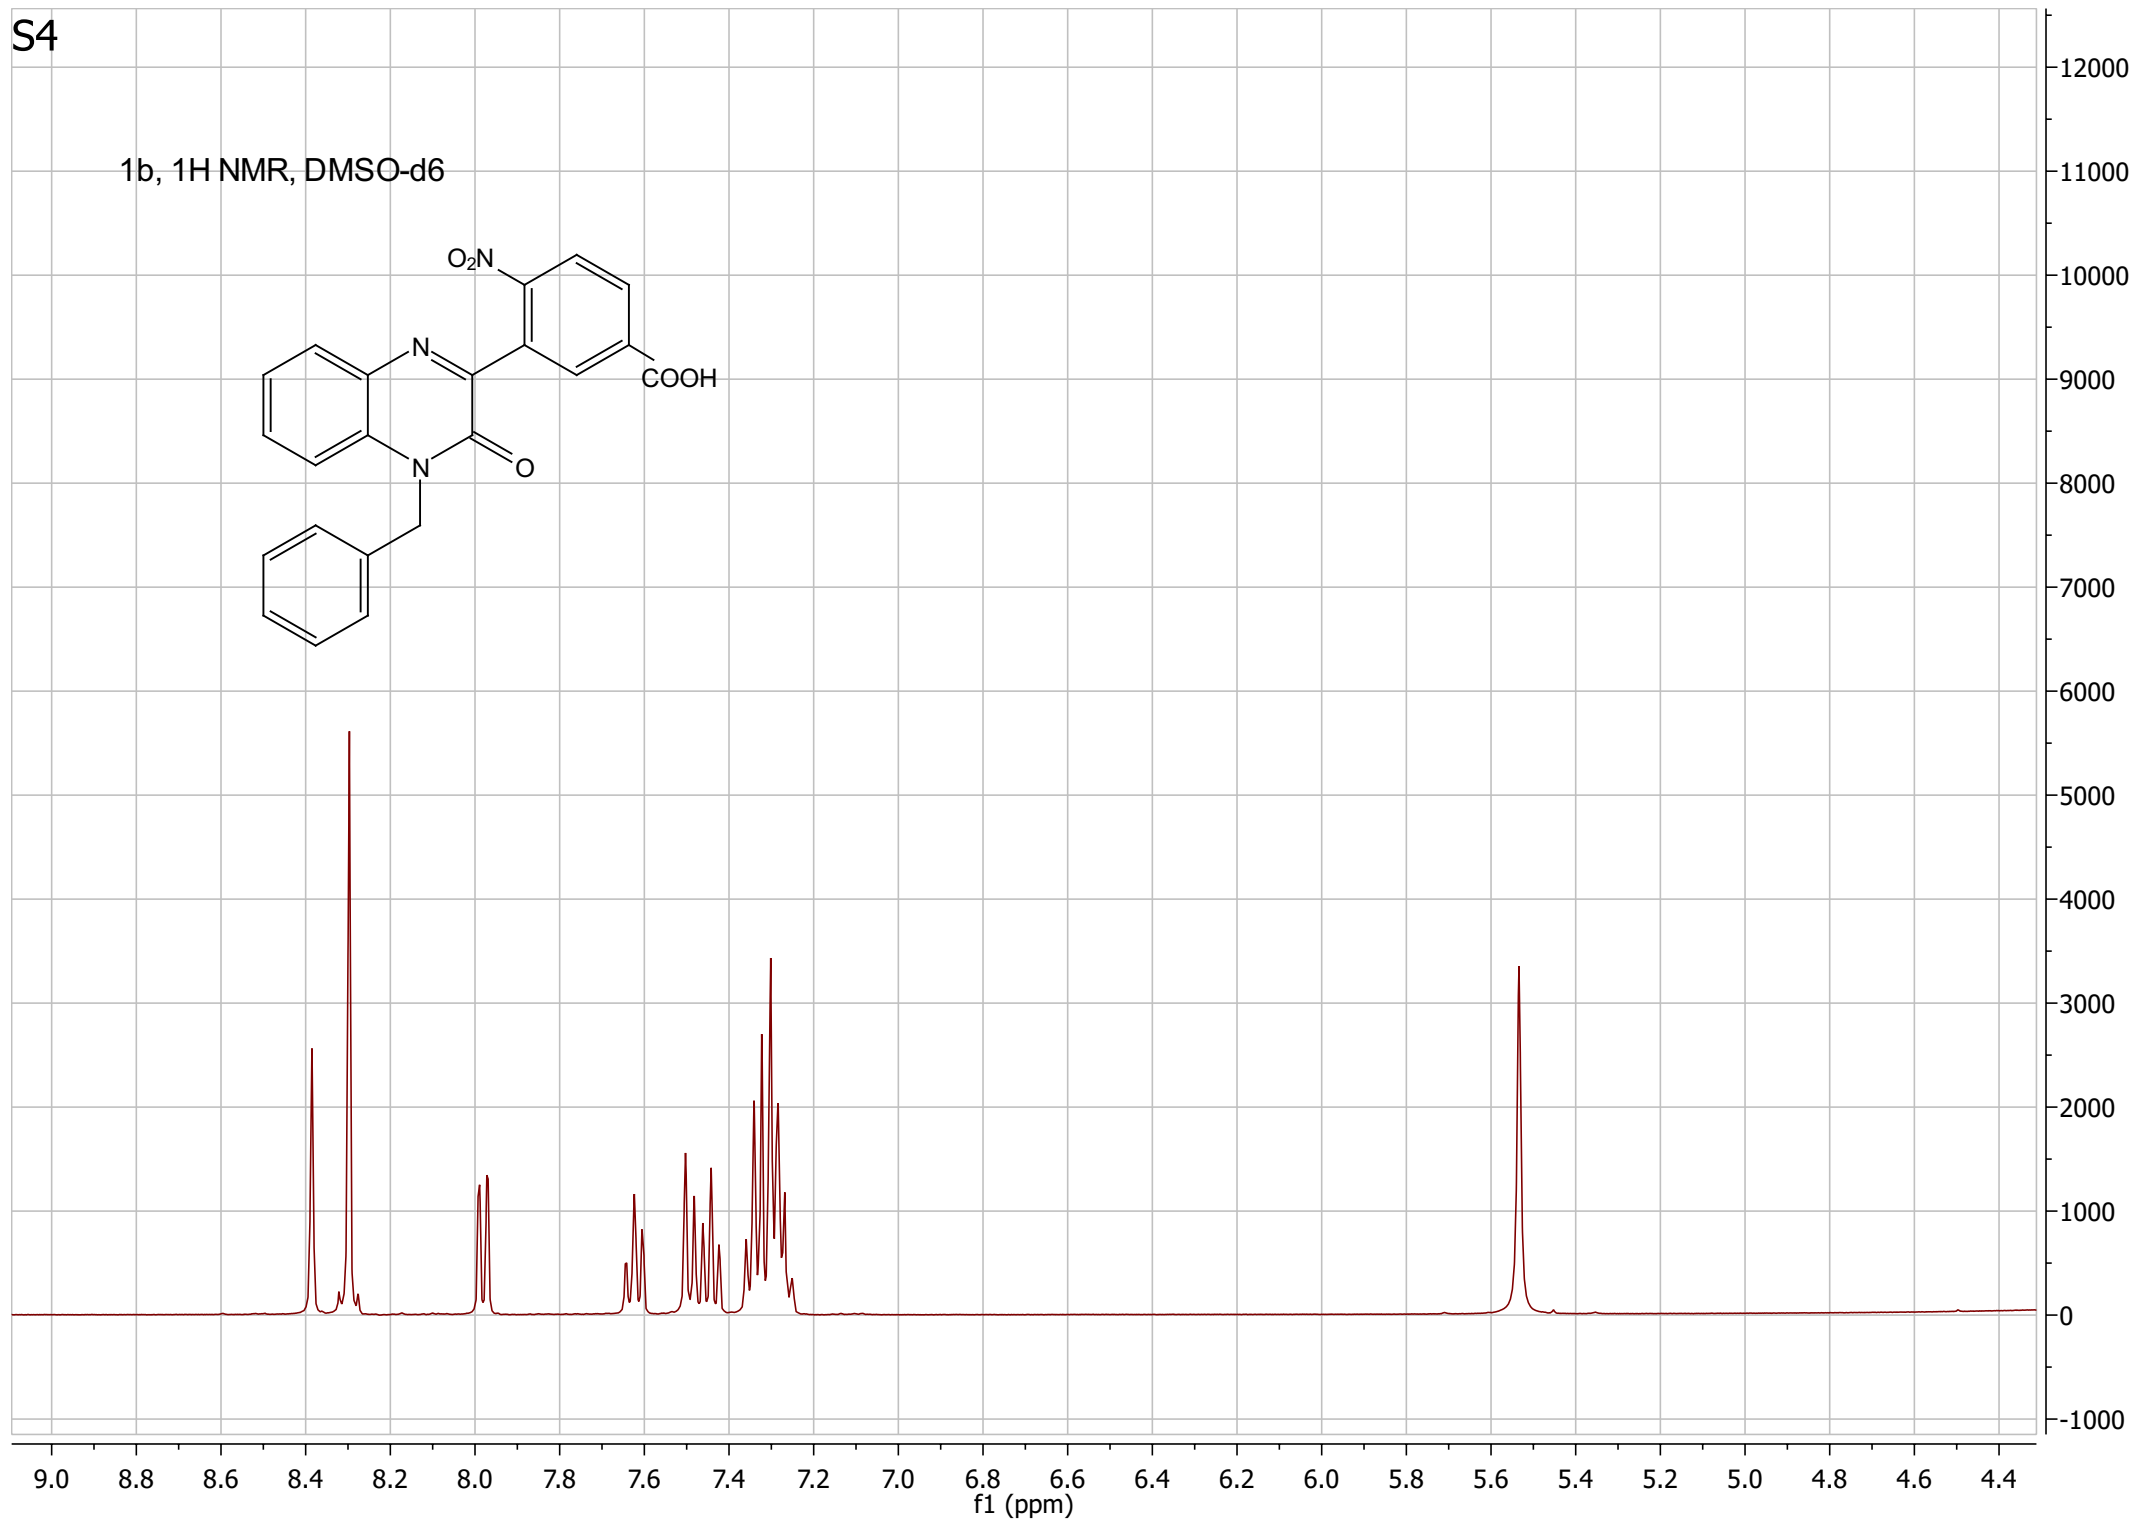

S5

1b, <sup>13</sup>C NMR, DMSO-d<sub>6</sub>

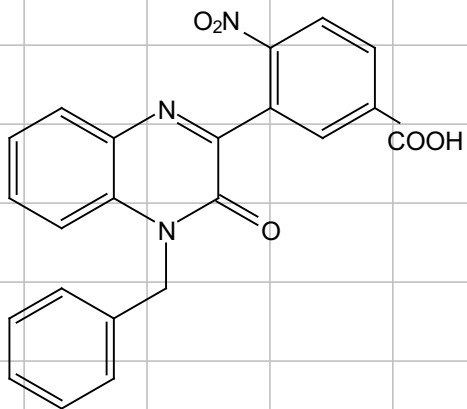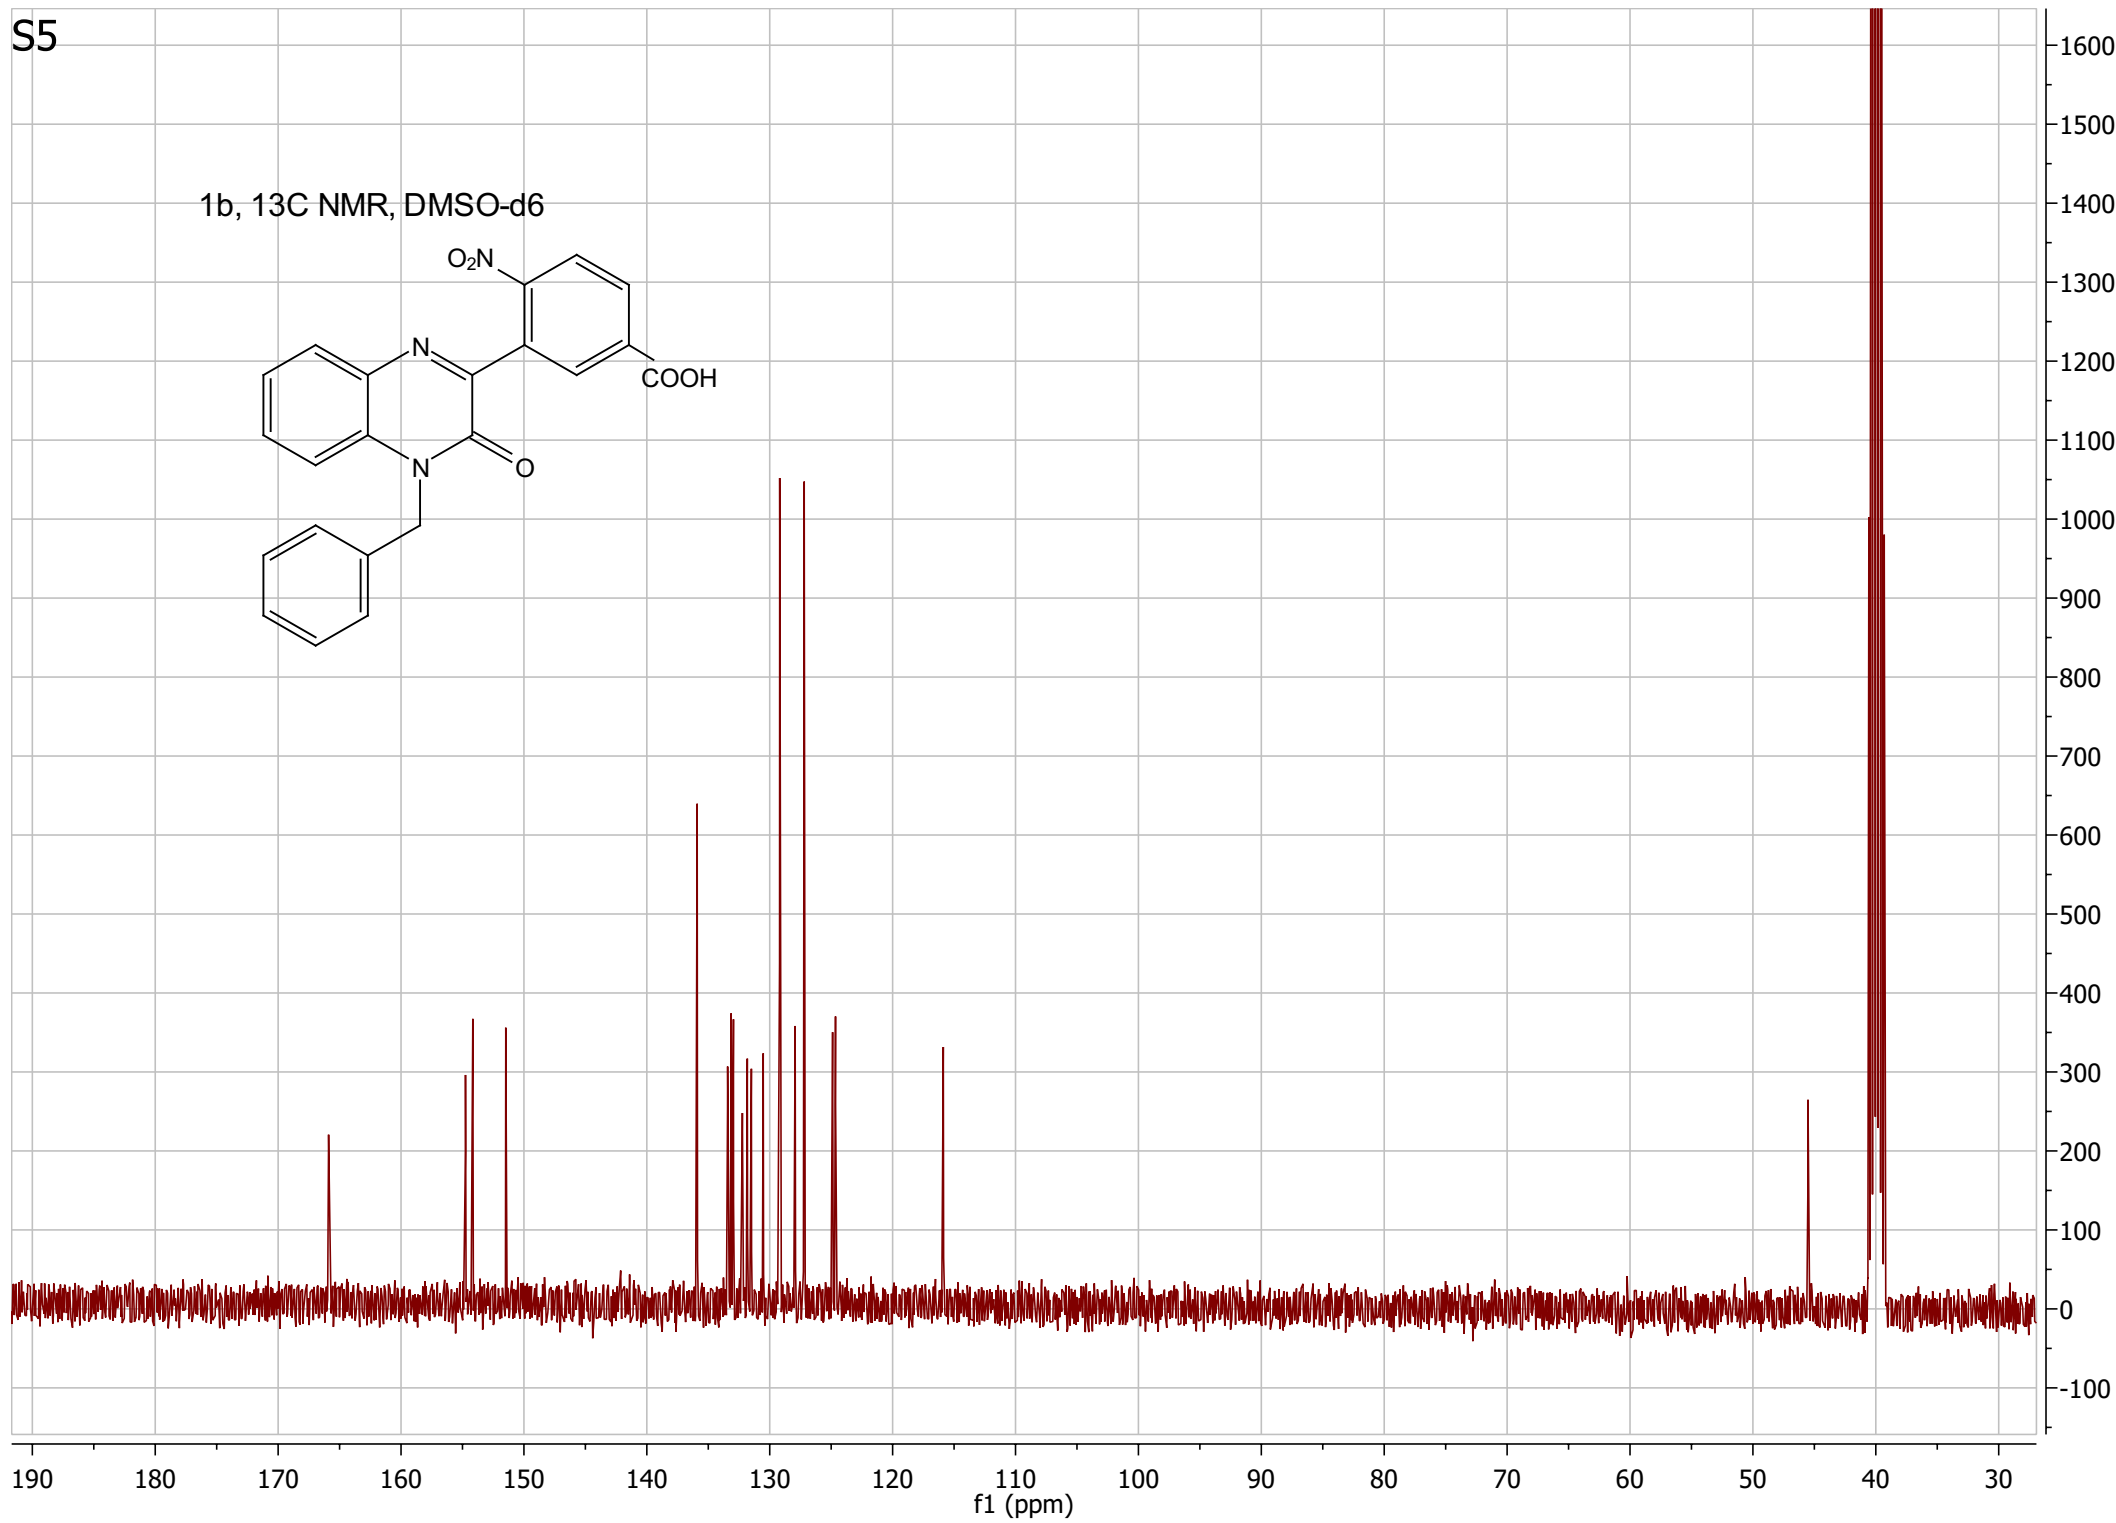

S6

1c, <sup>1</sup>H NMR, CDCl<sub>3</sub>

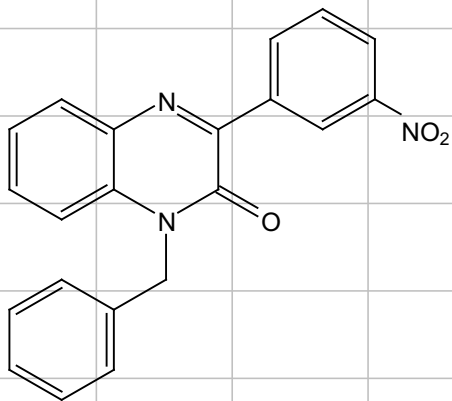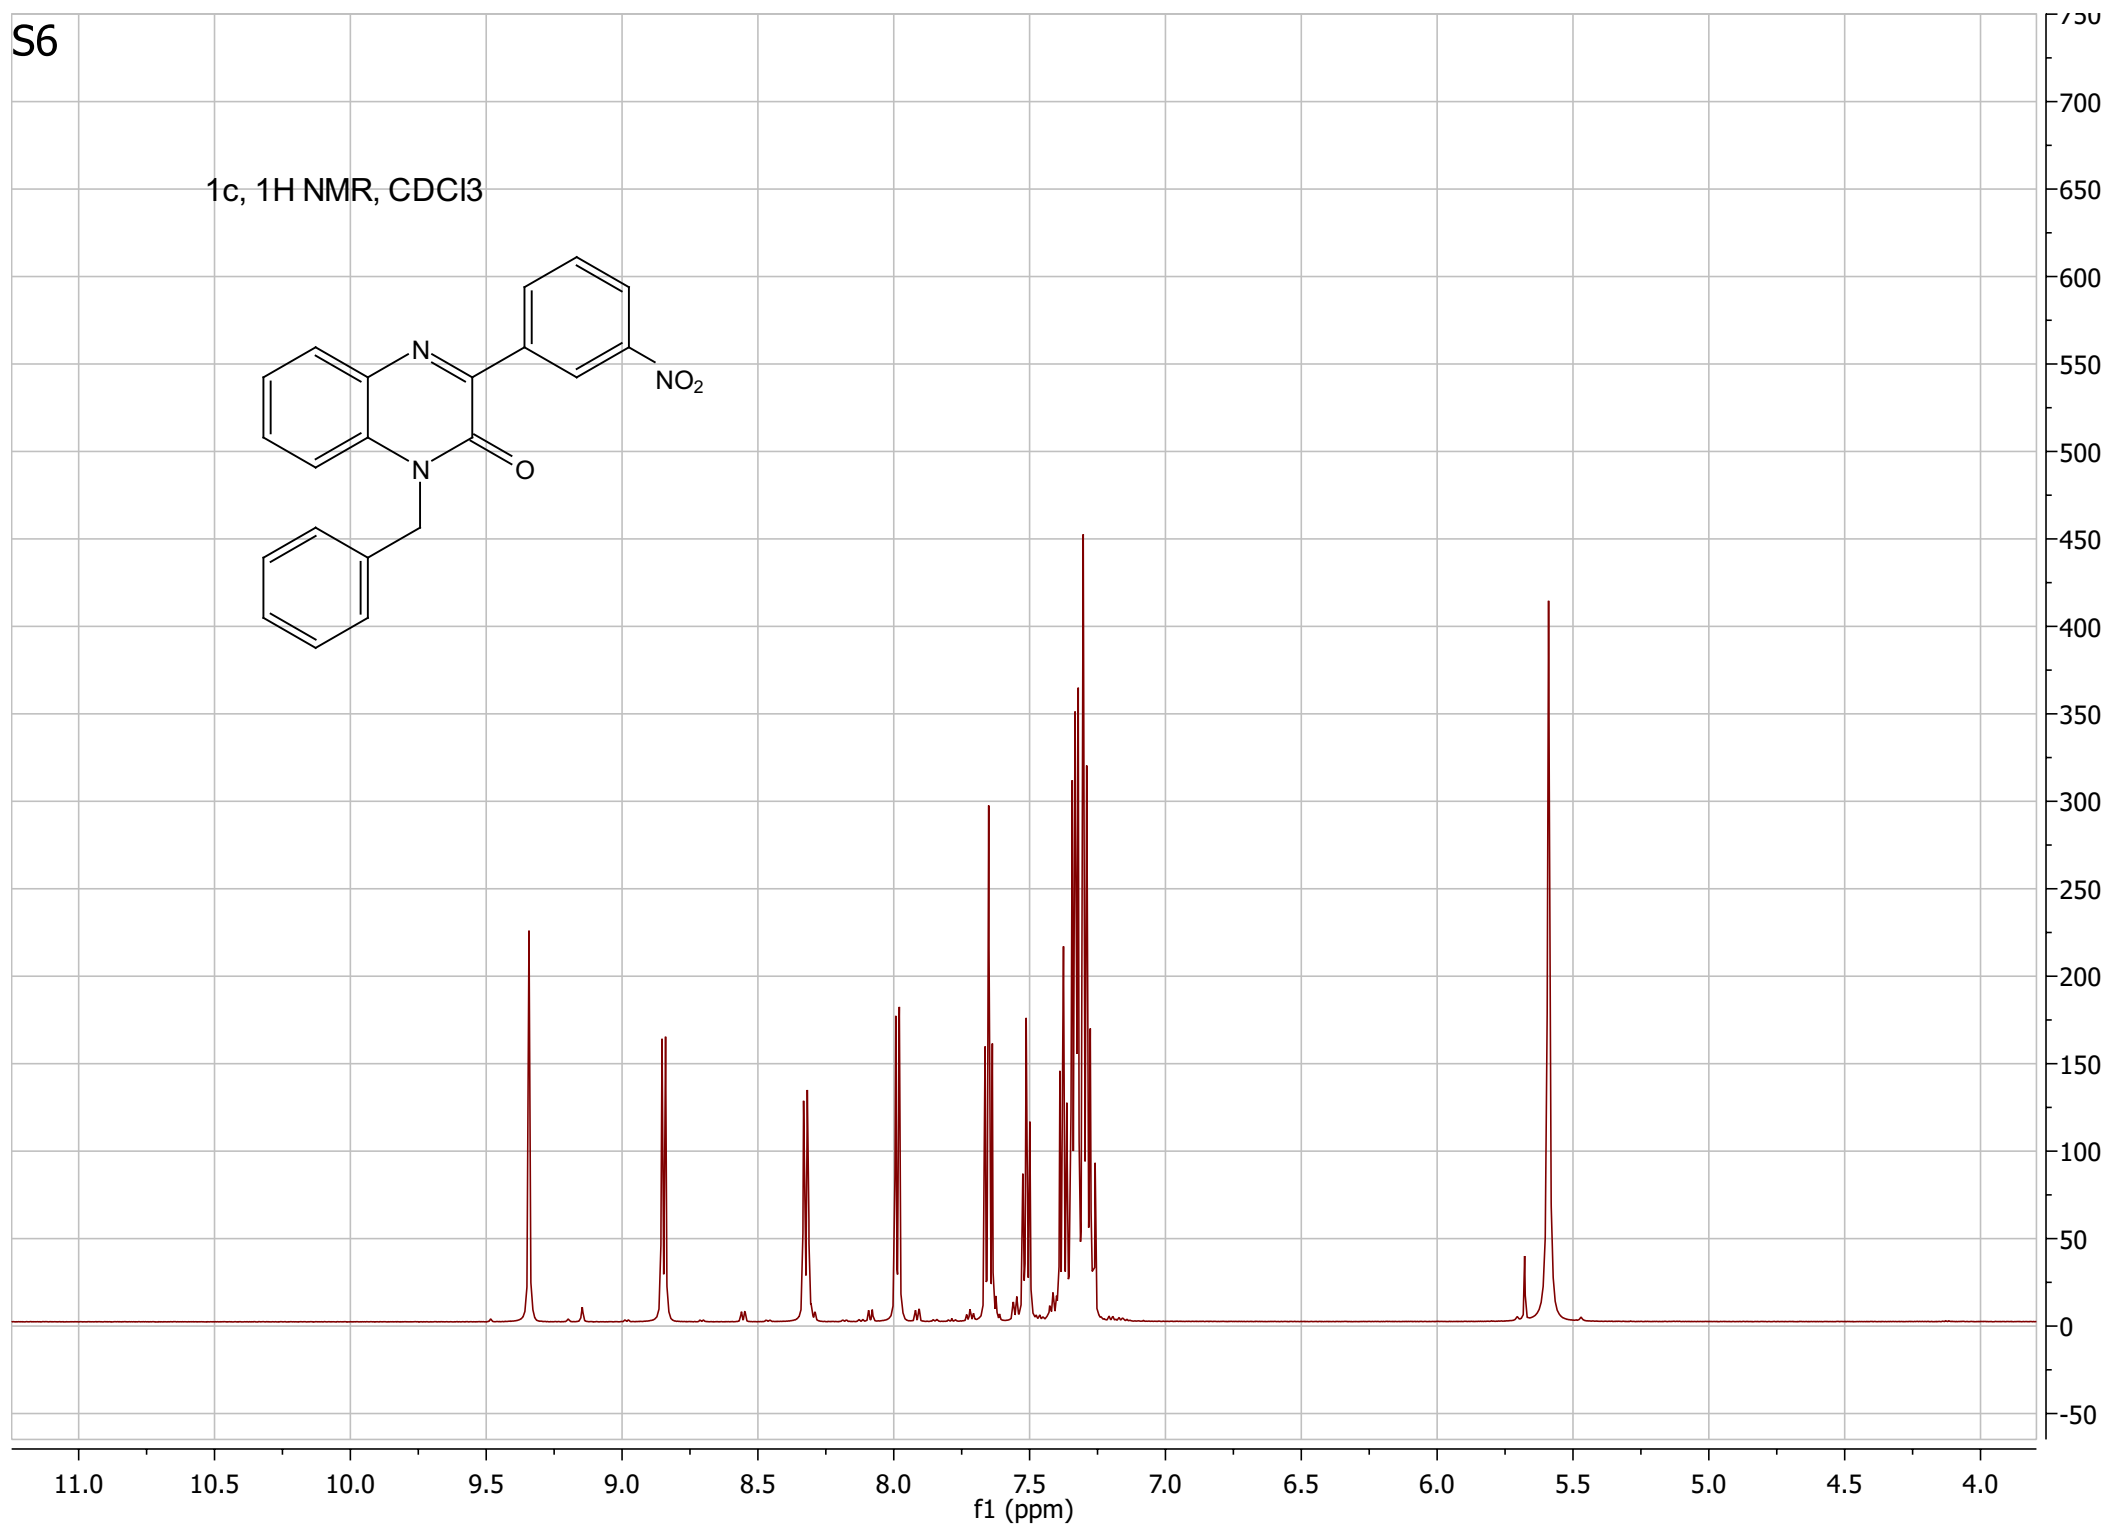

S7

1c, <sup>13</sup>C NMR, CDCl<sub>3</sub>

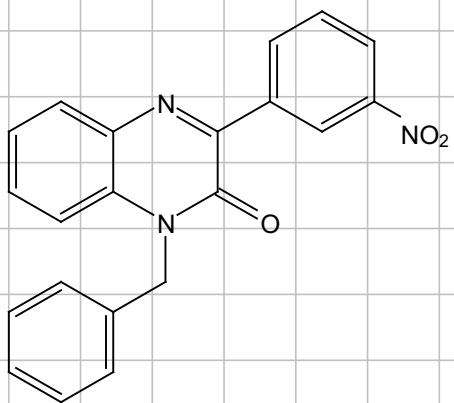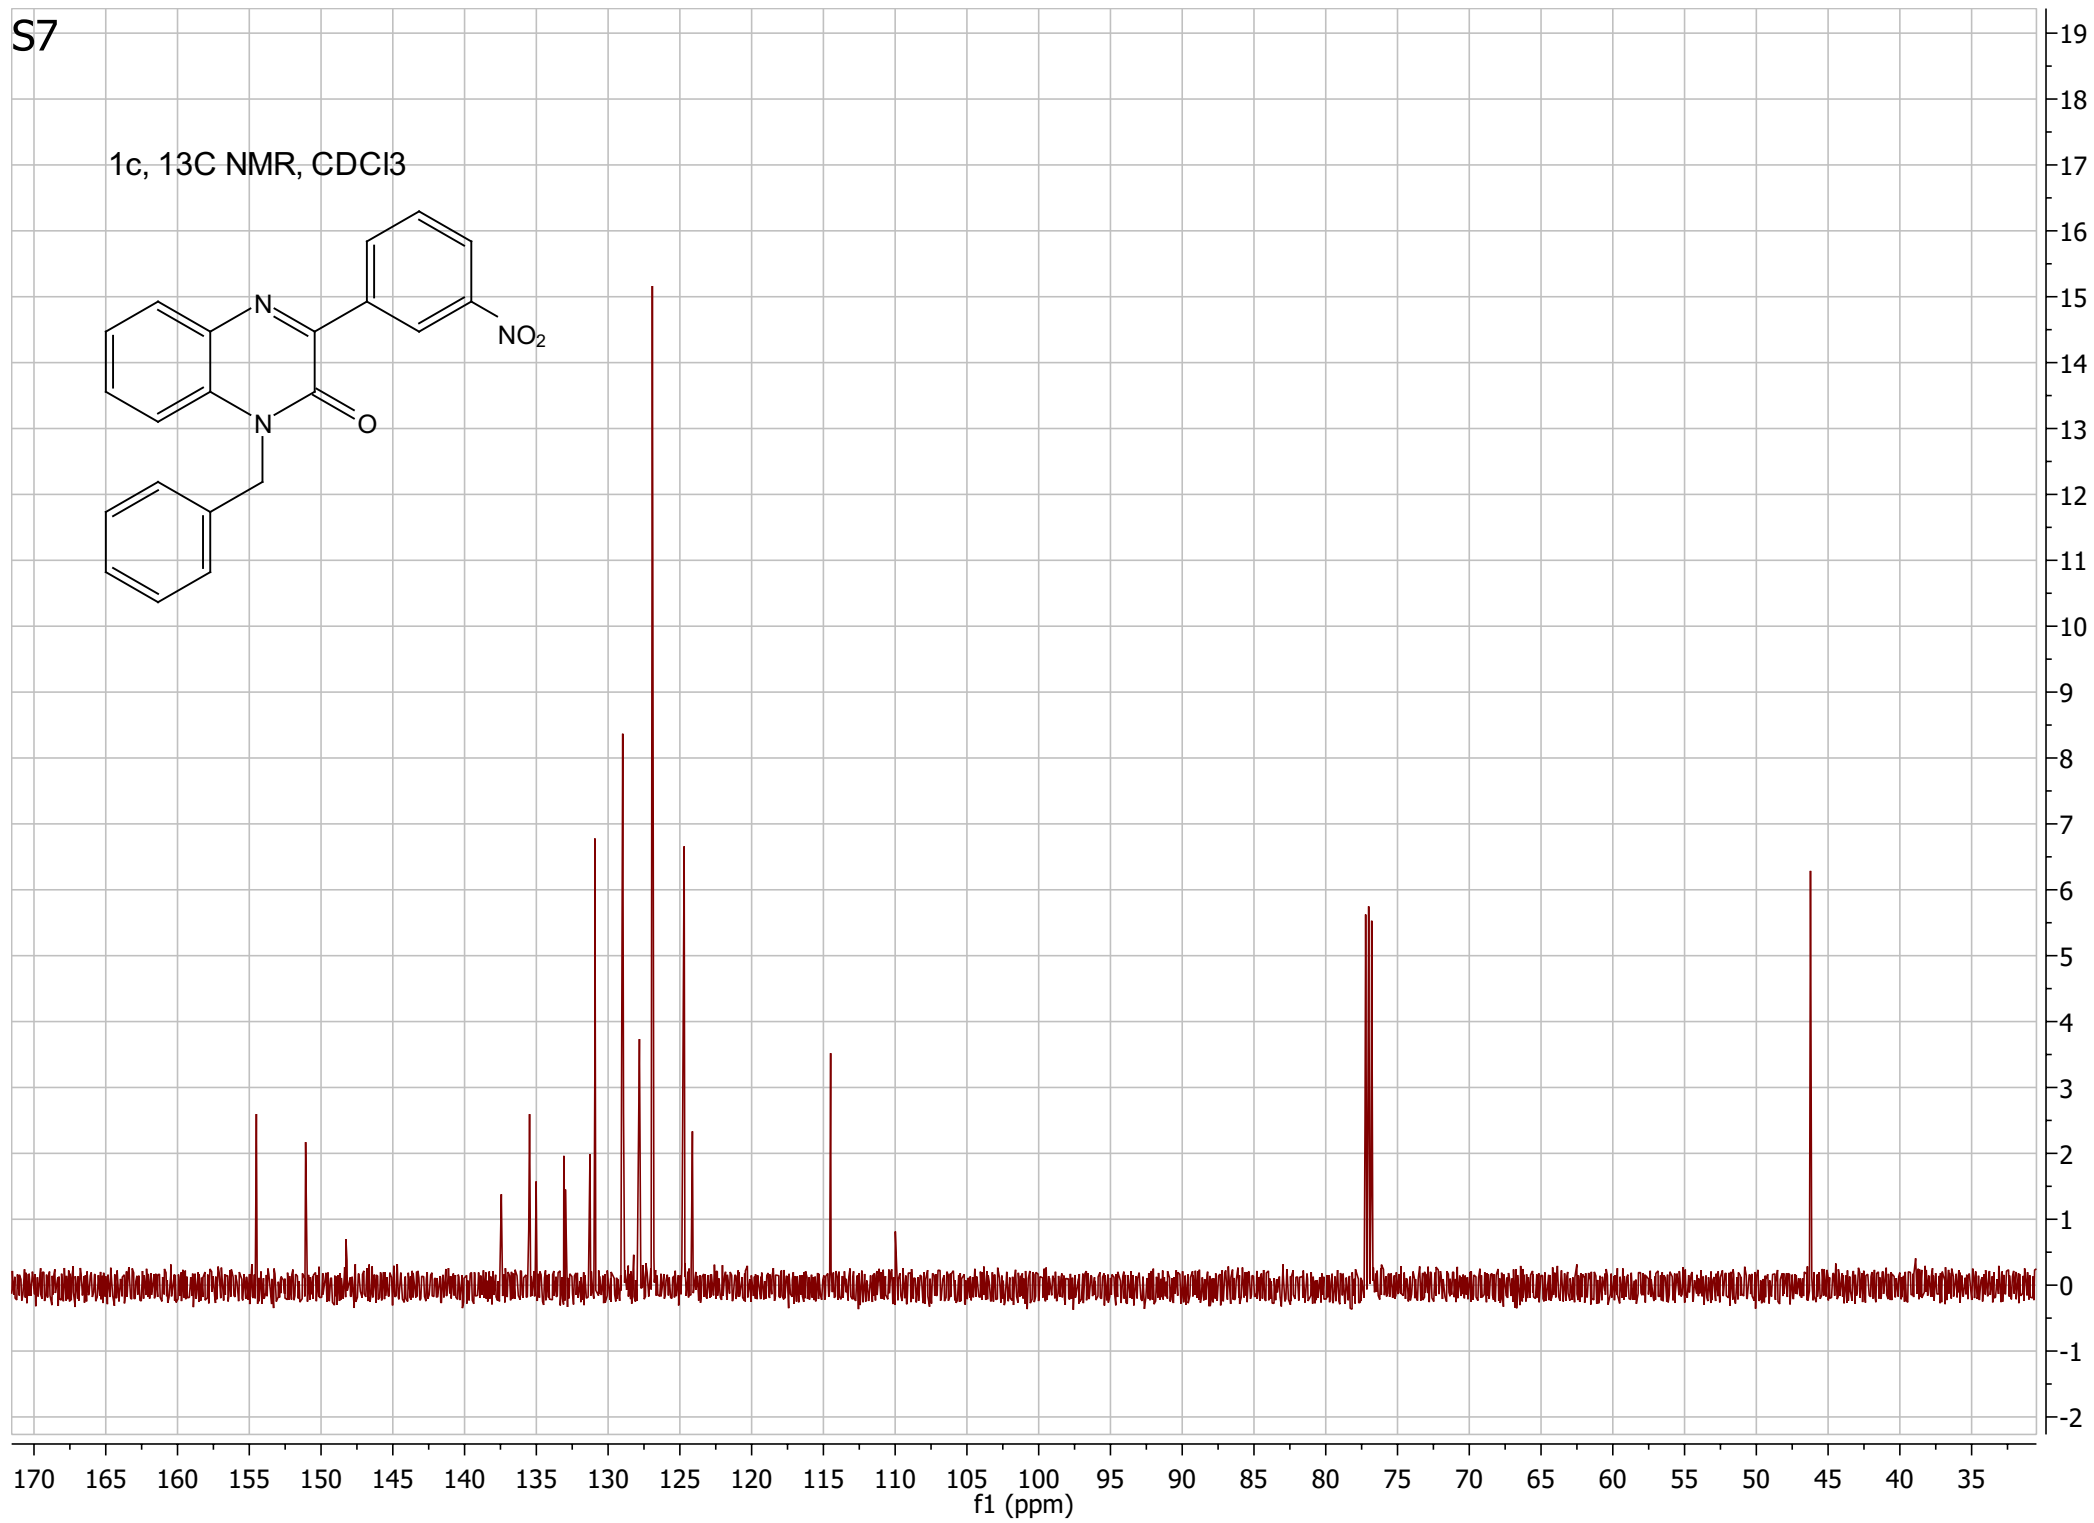

S8

1d, <sup>1</sup>H NMR, CDCl<sub>3</sub>

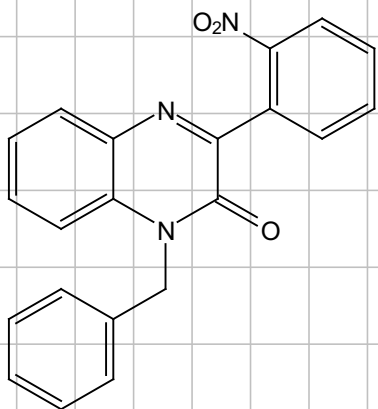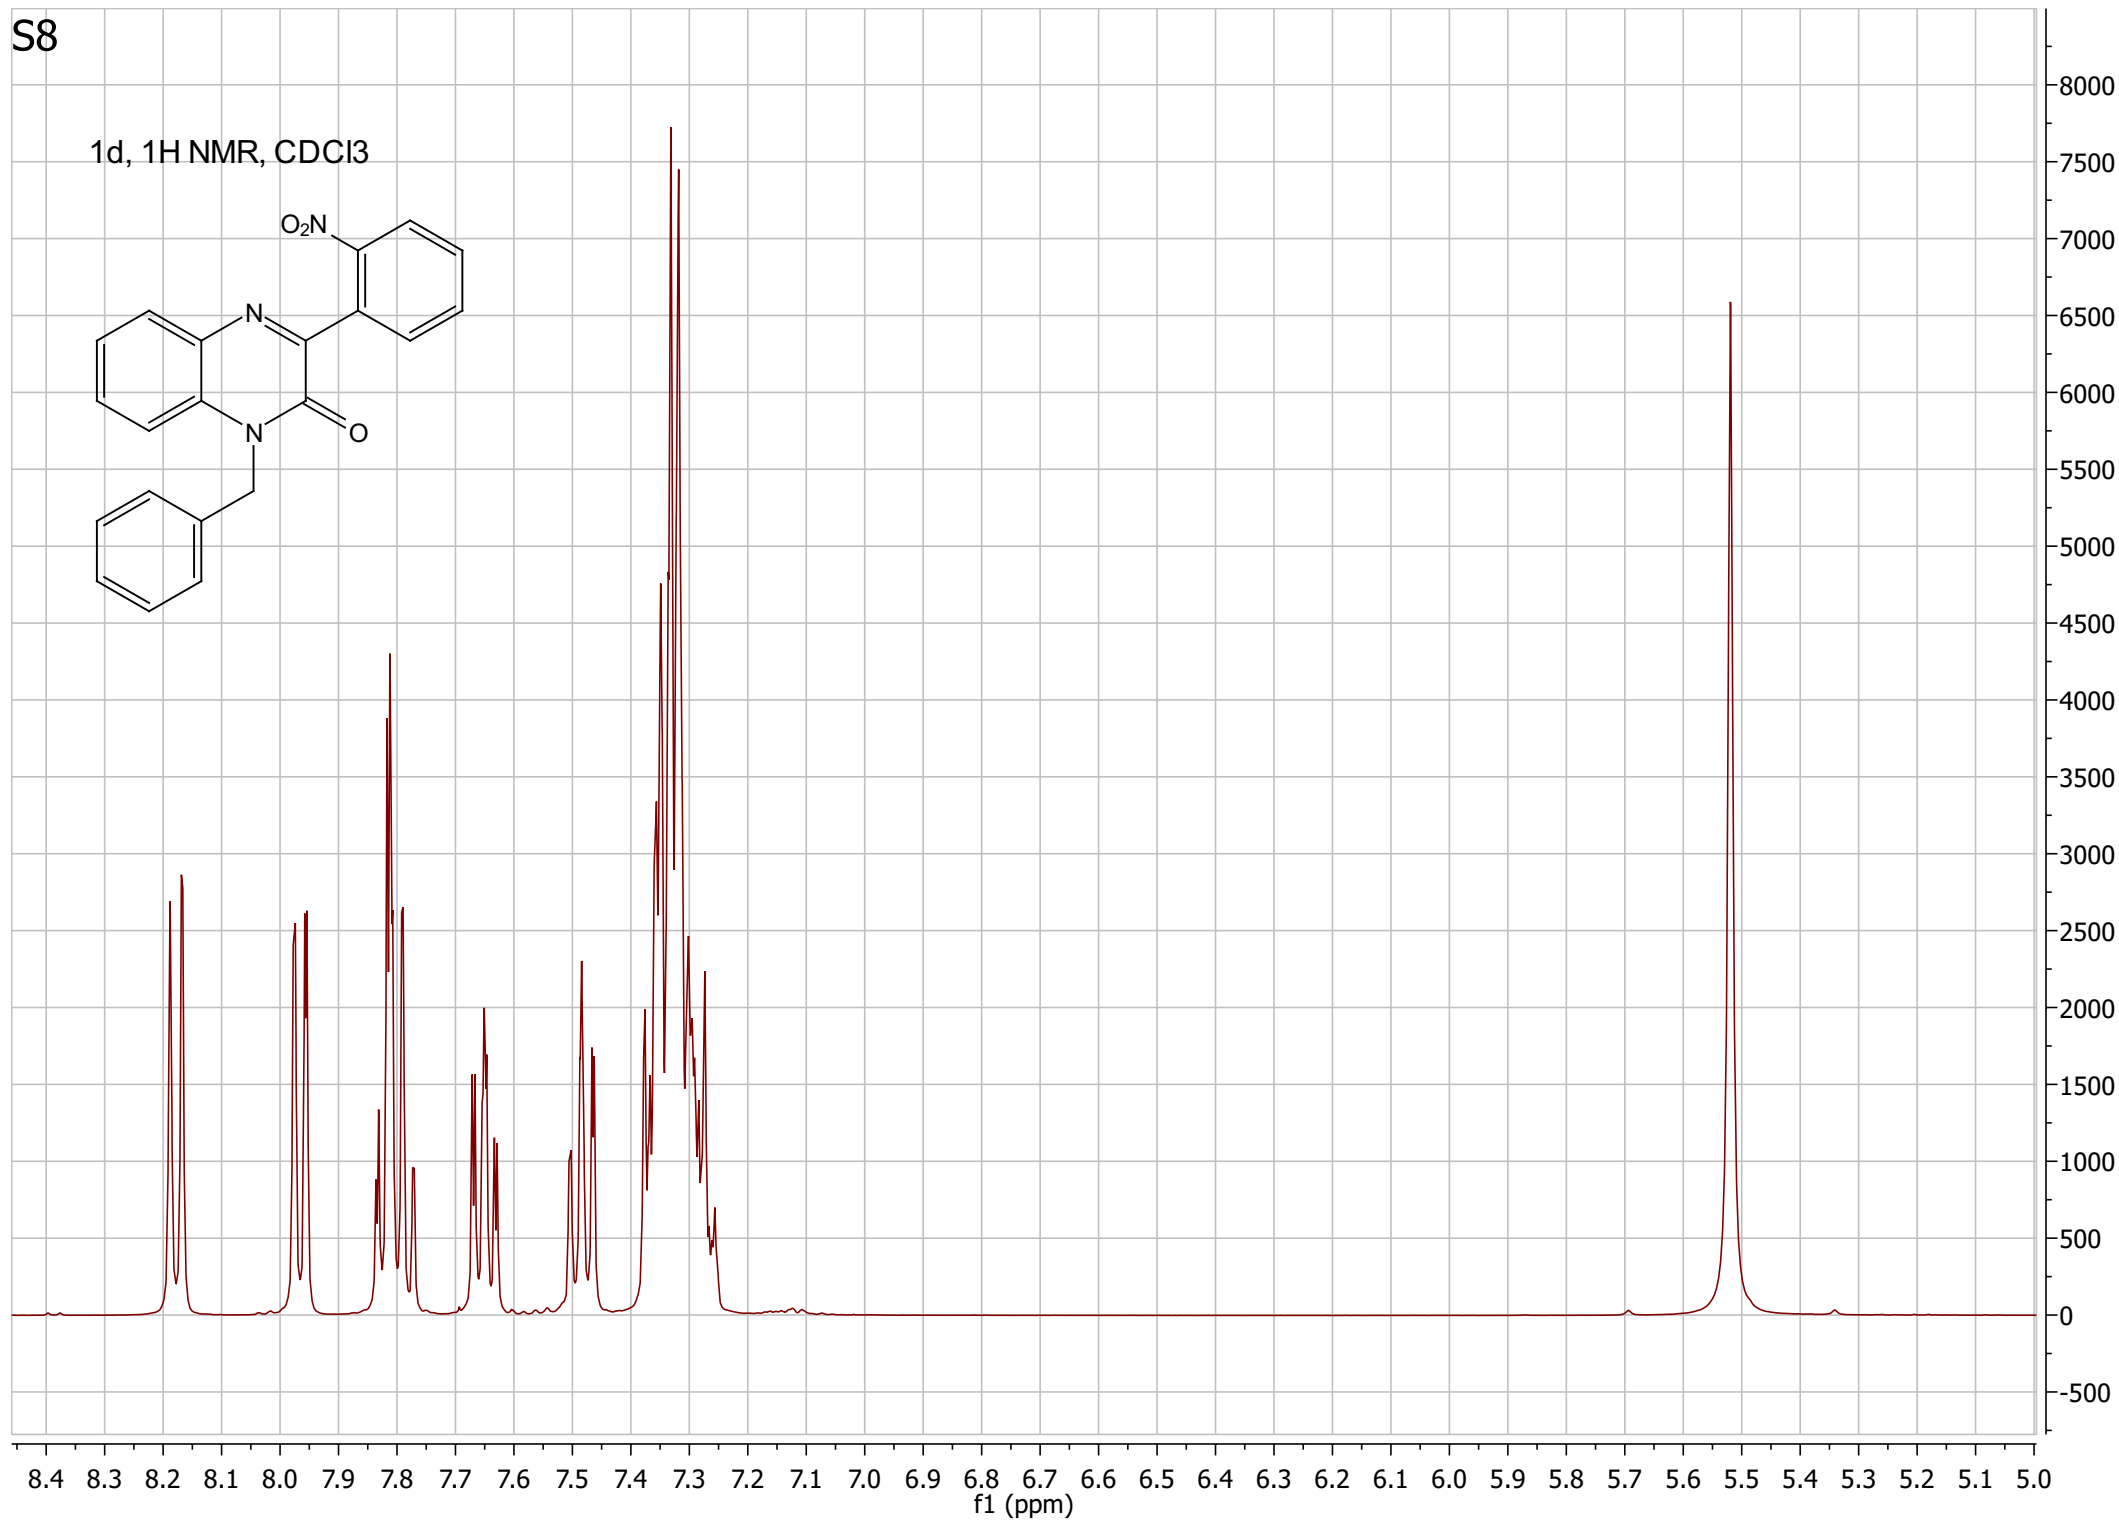



S9

1d, <sup>13</sup>C NMR, CDCl<sub>3</sub>

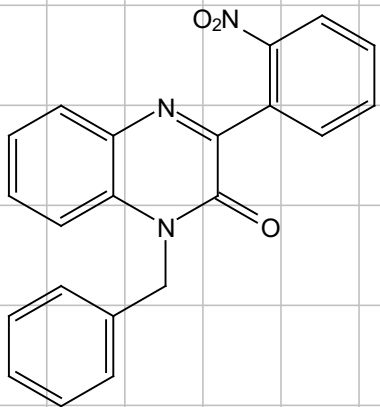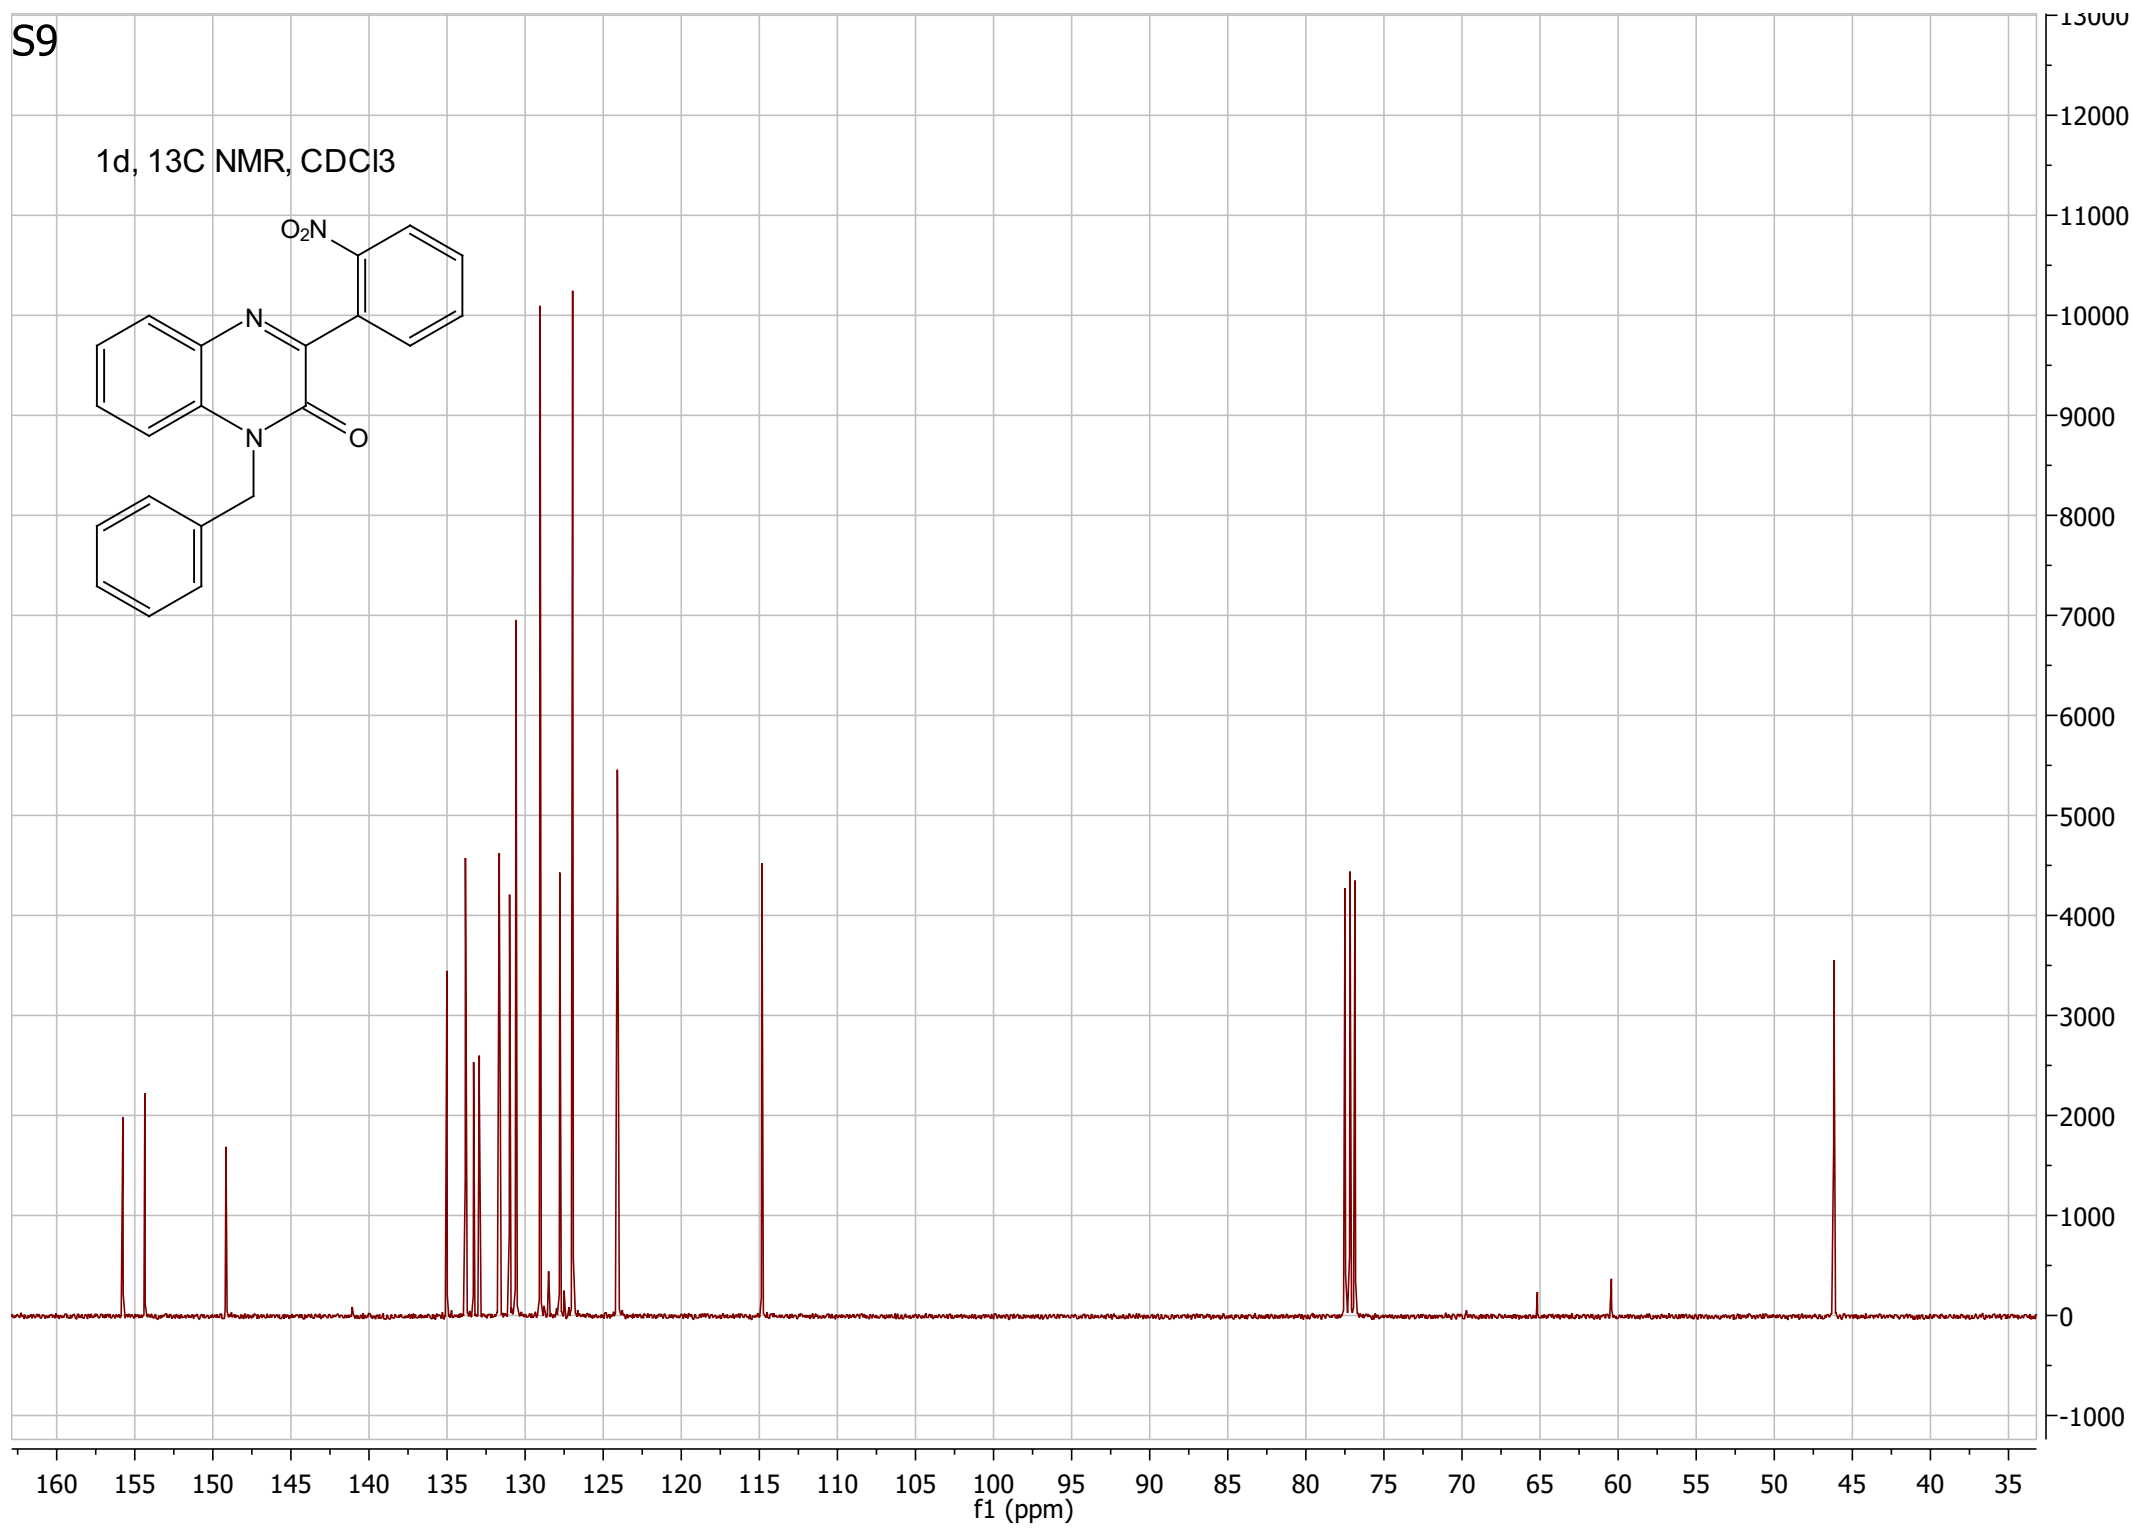

S10

1e, <sup>1</sup>H NMR, CDCl<sub>3</sub>

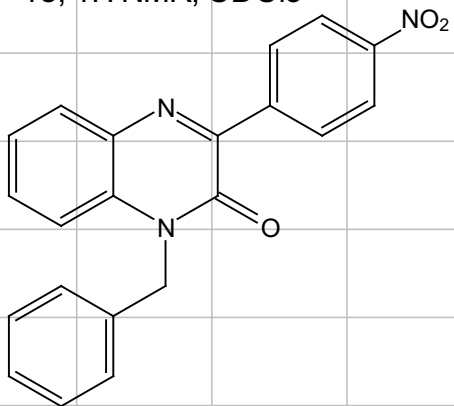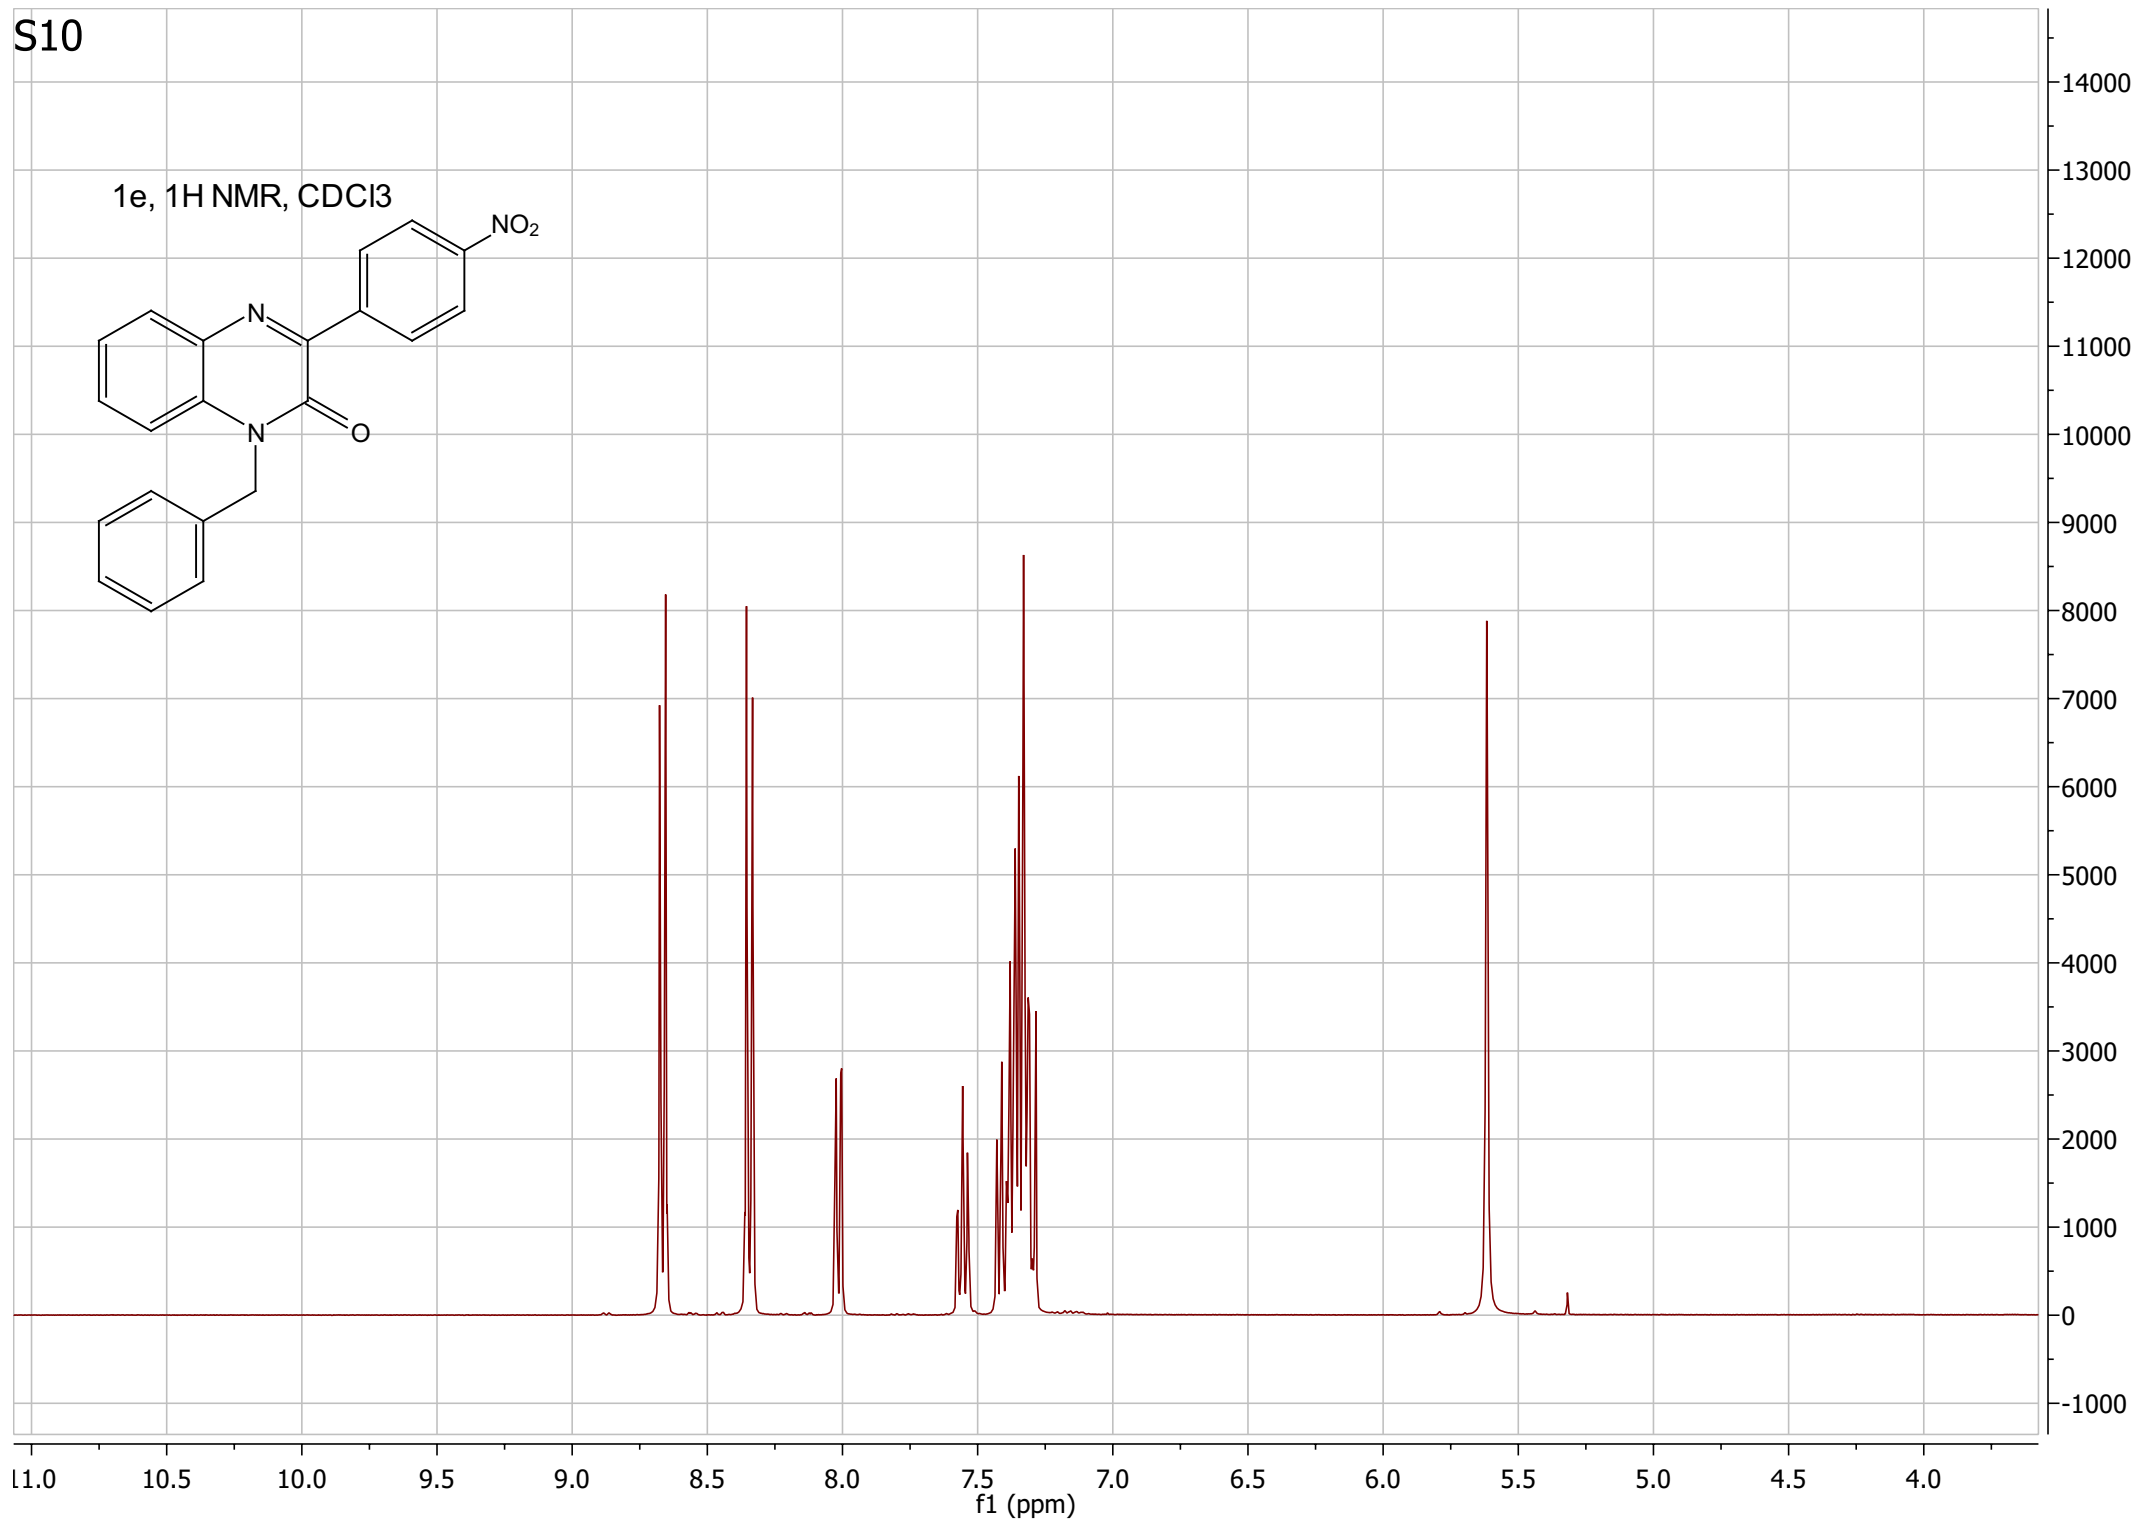

S11

1e, <sup>13</sup>C NMR, CDCl<sub>3</sub>

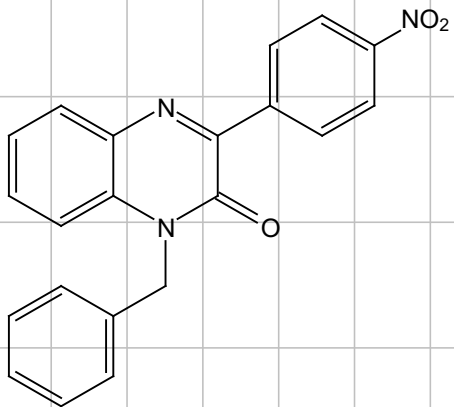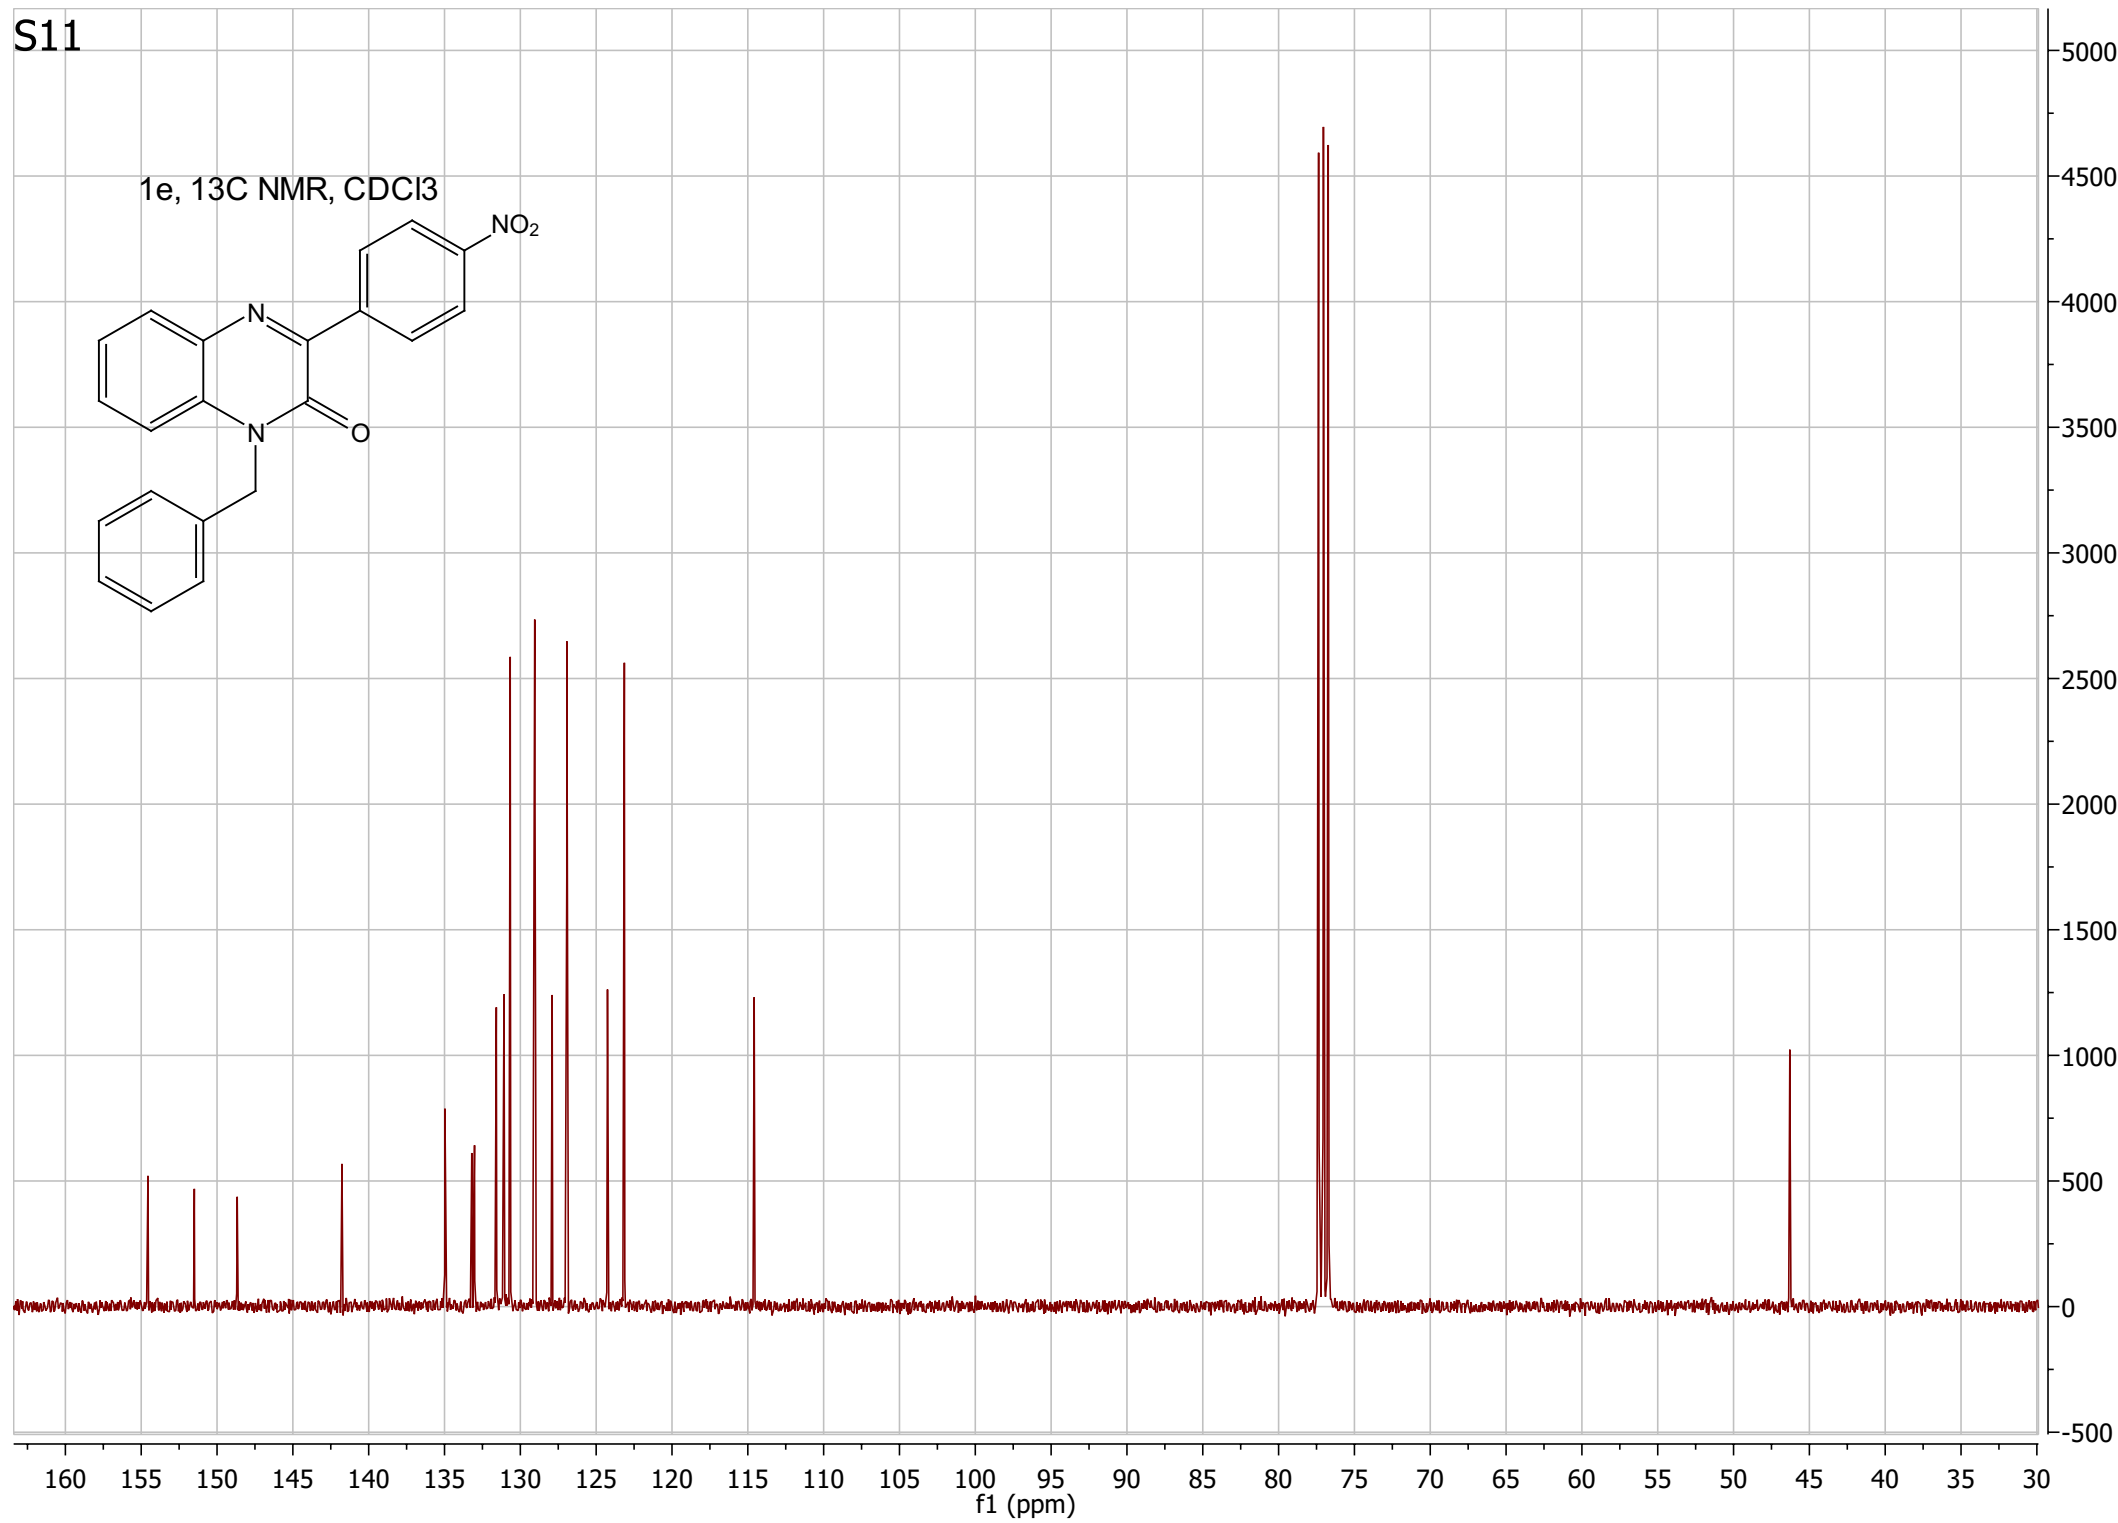

S12

1f, <sup>1</sup>H NMR, CDCl<sub>3</sub>

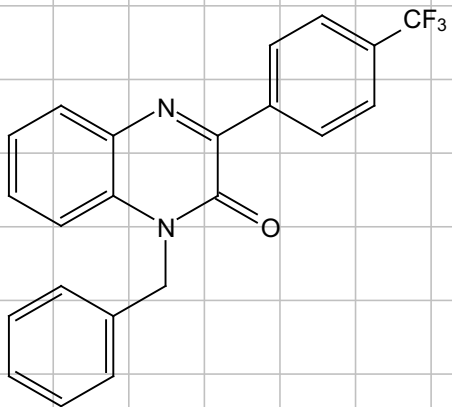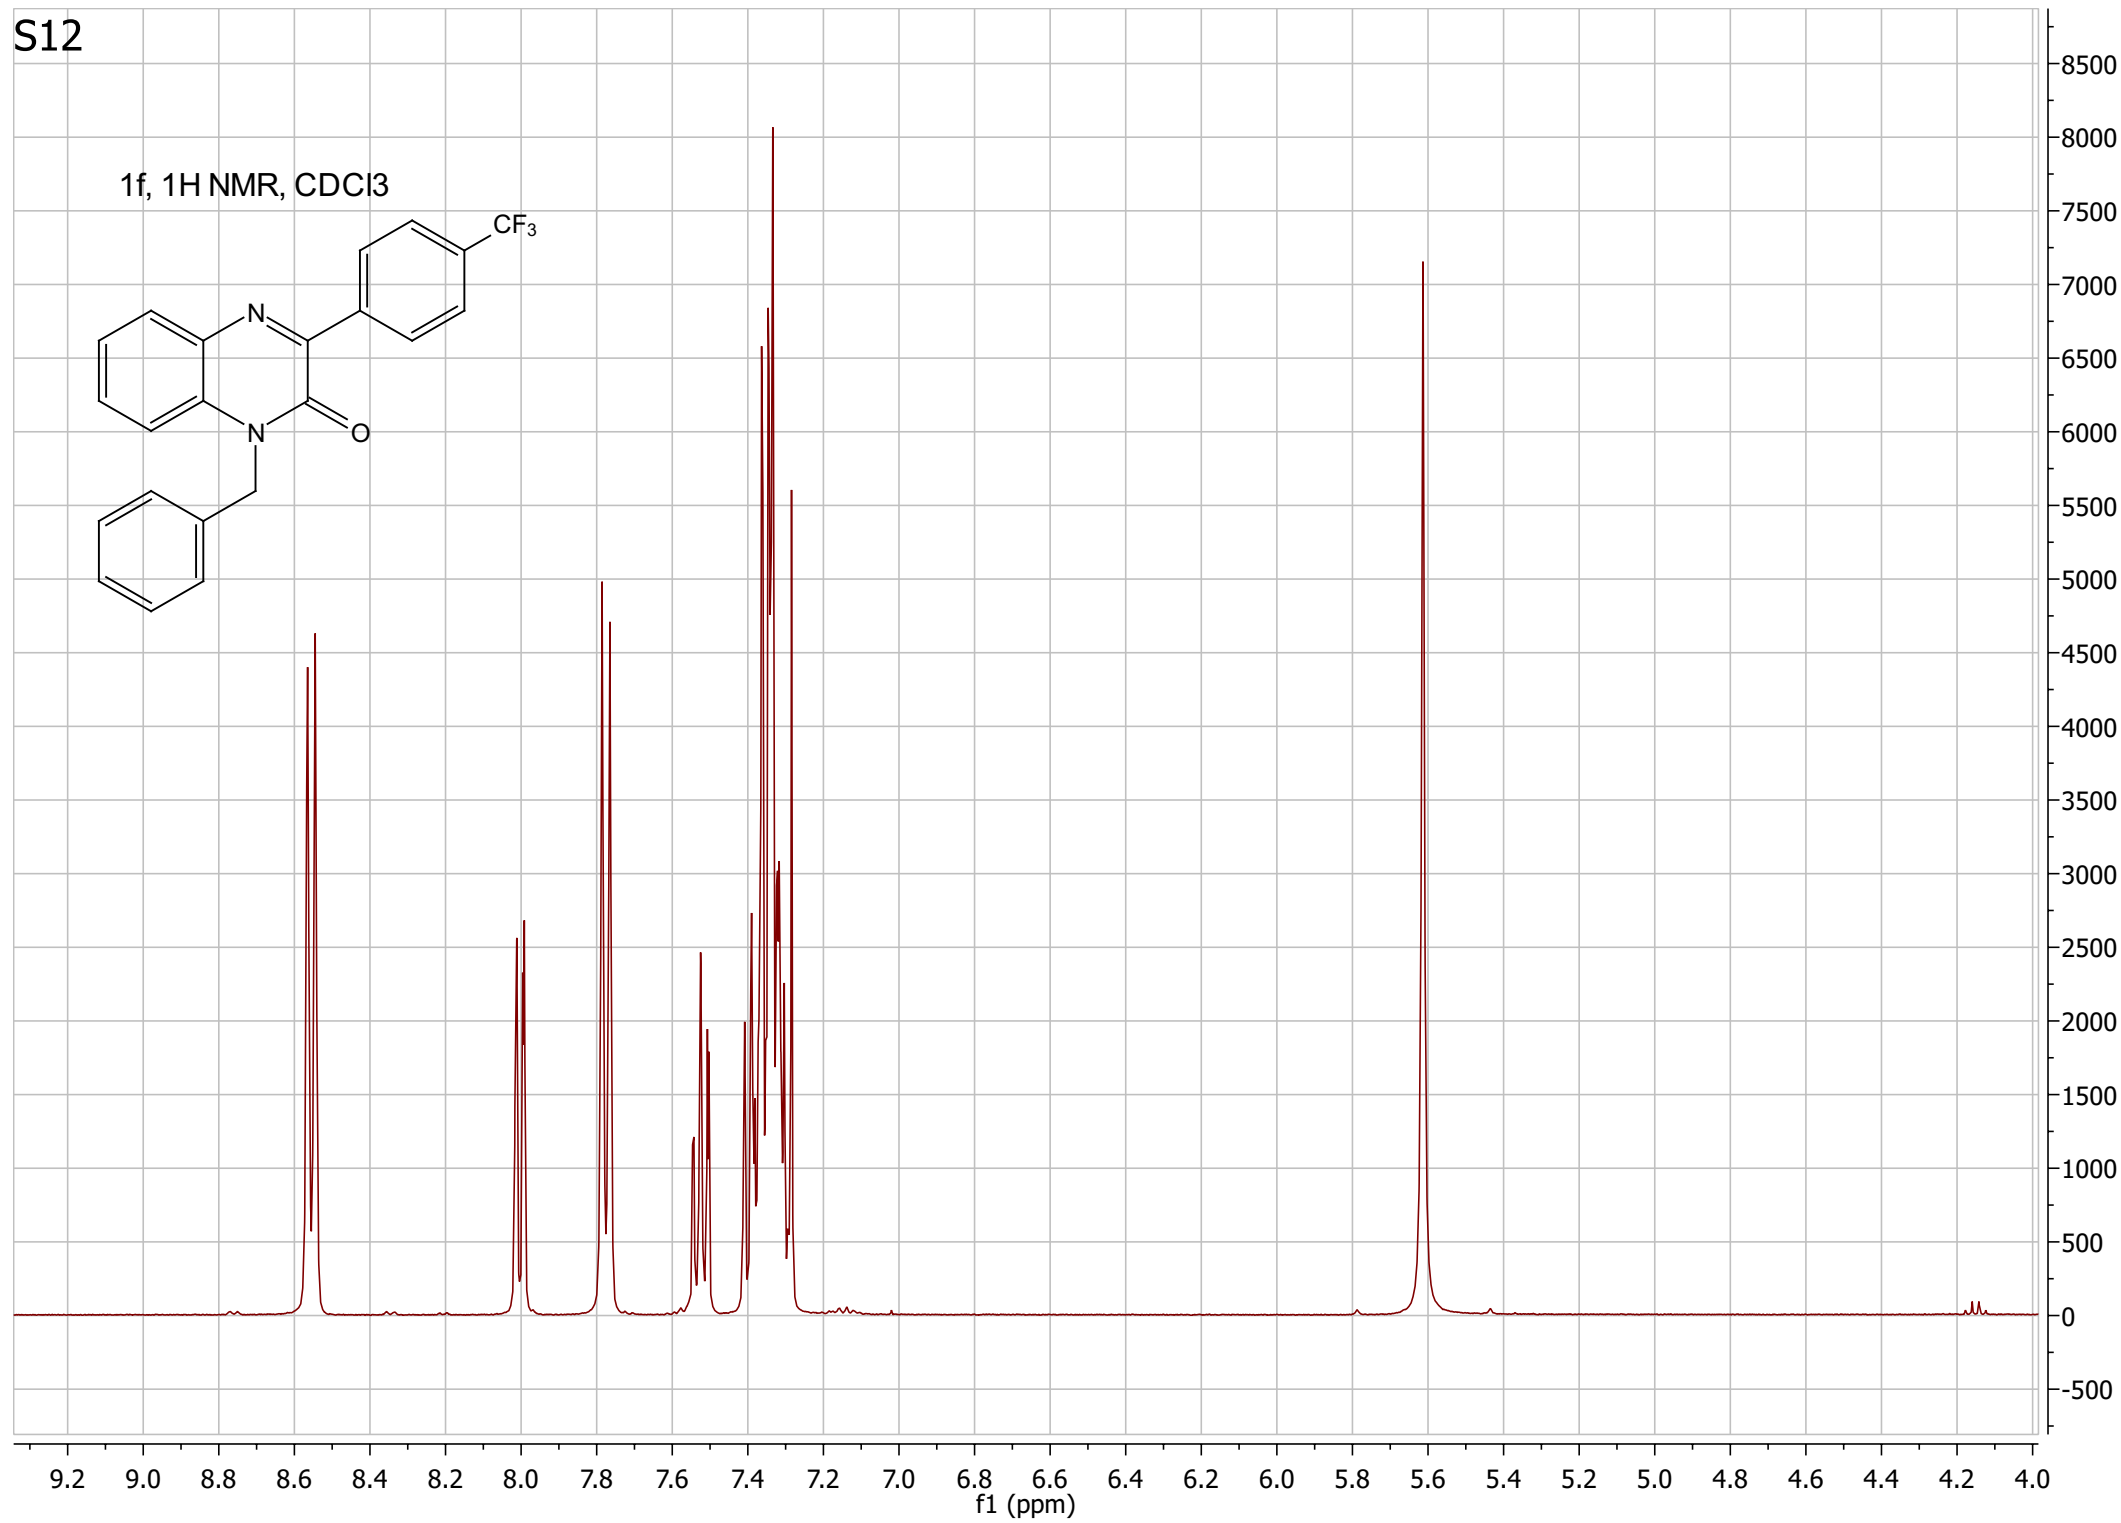

S13

1f, <sup>13</sup>C NMR, CDCl<sub>3</sub>

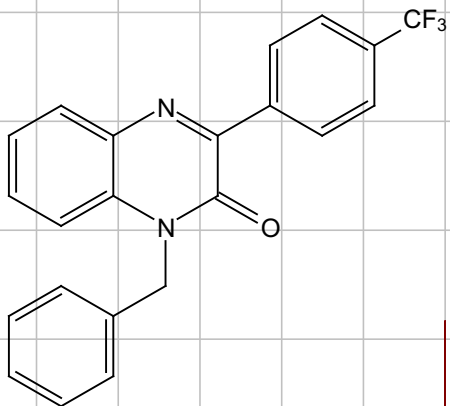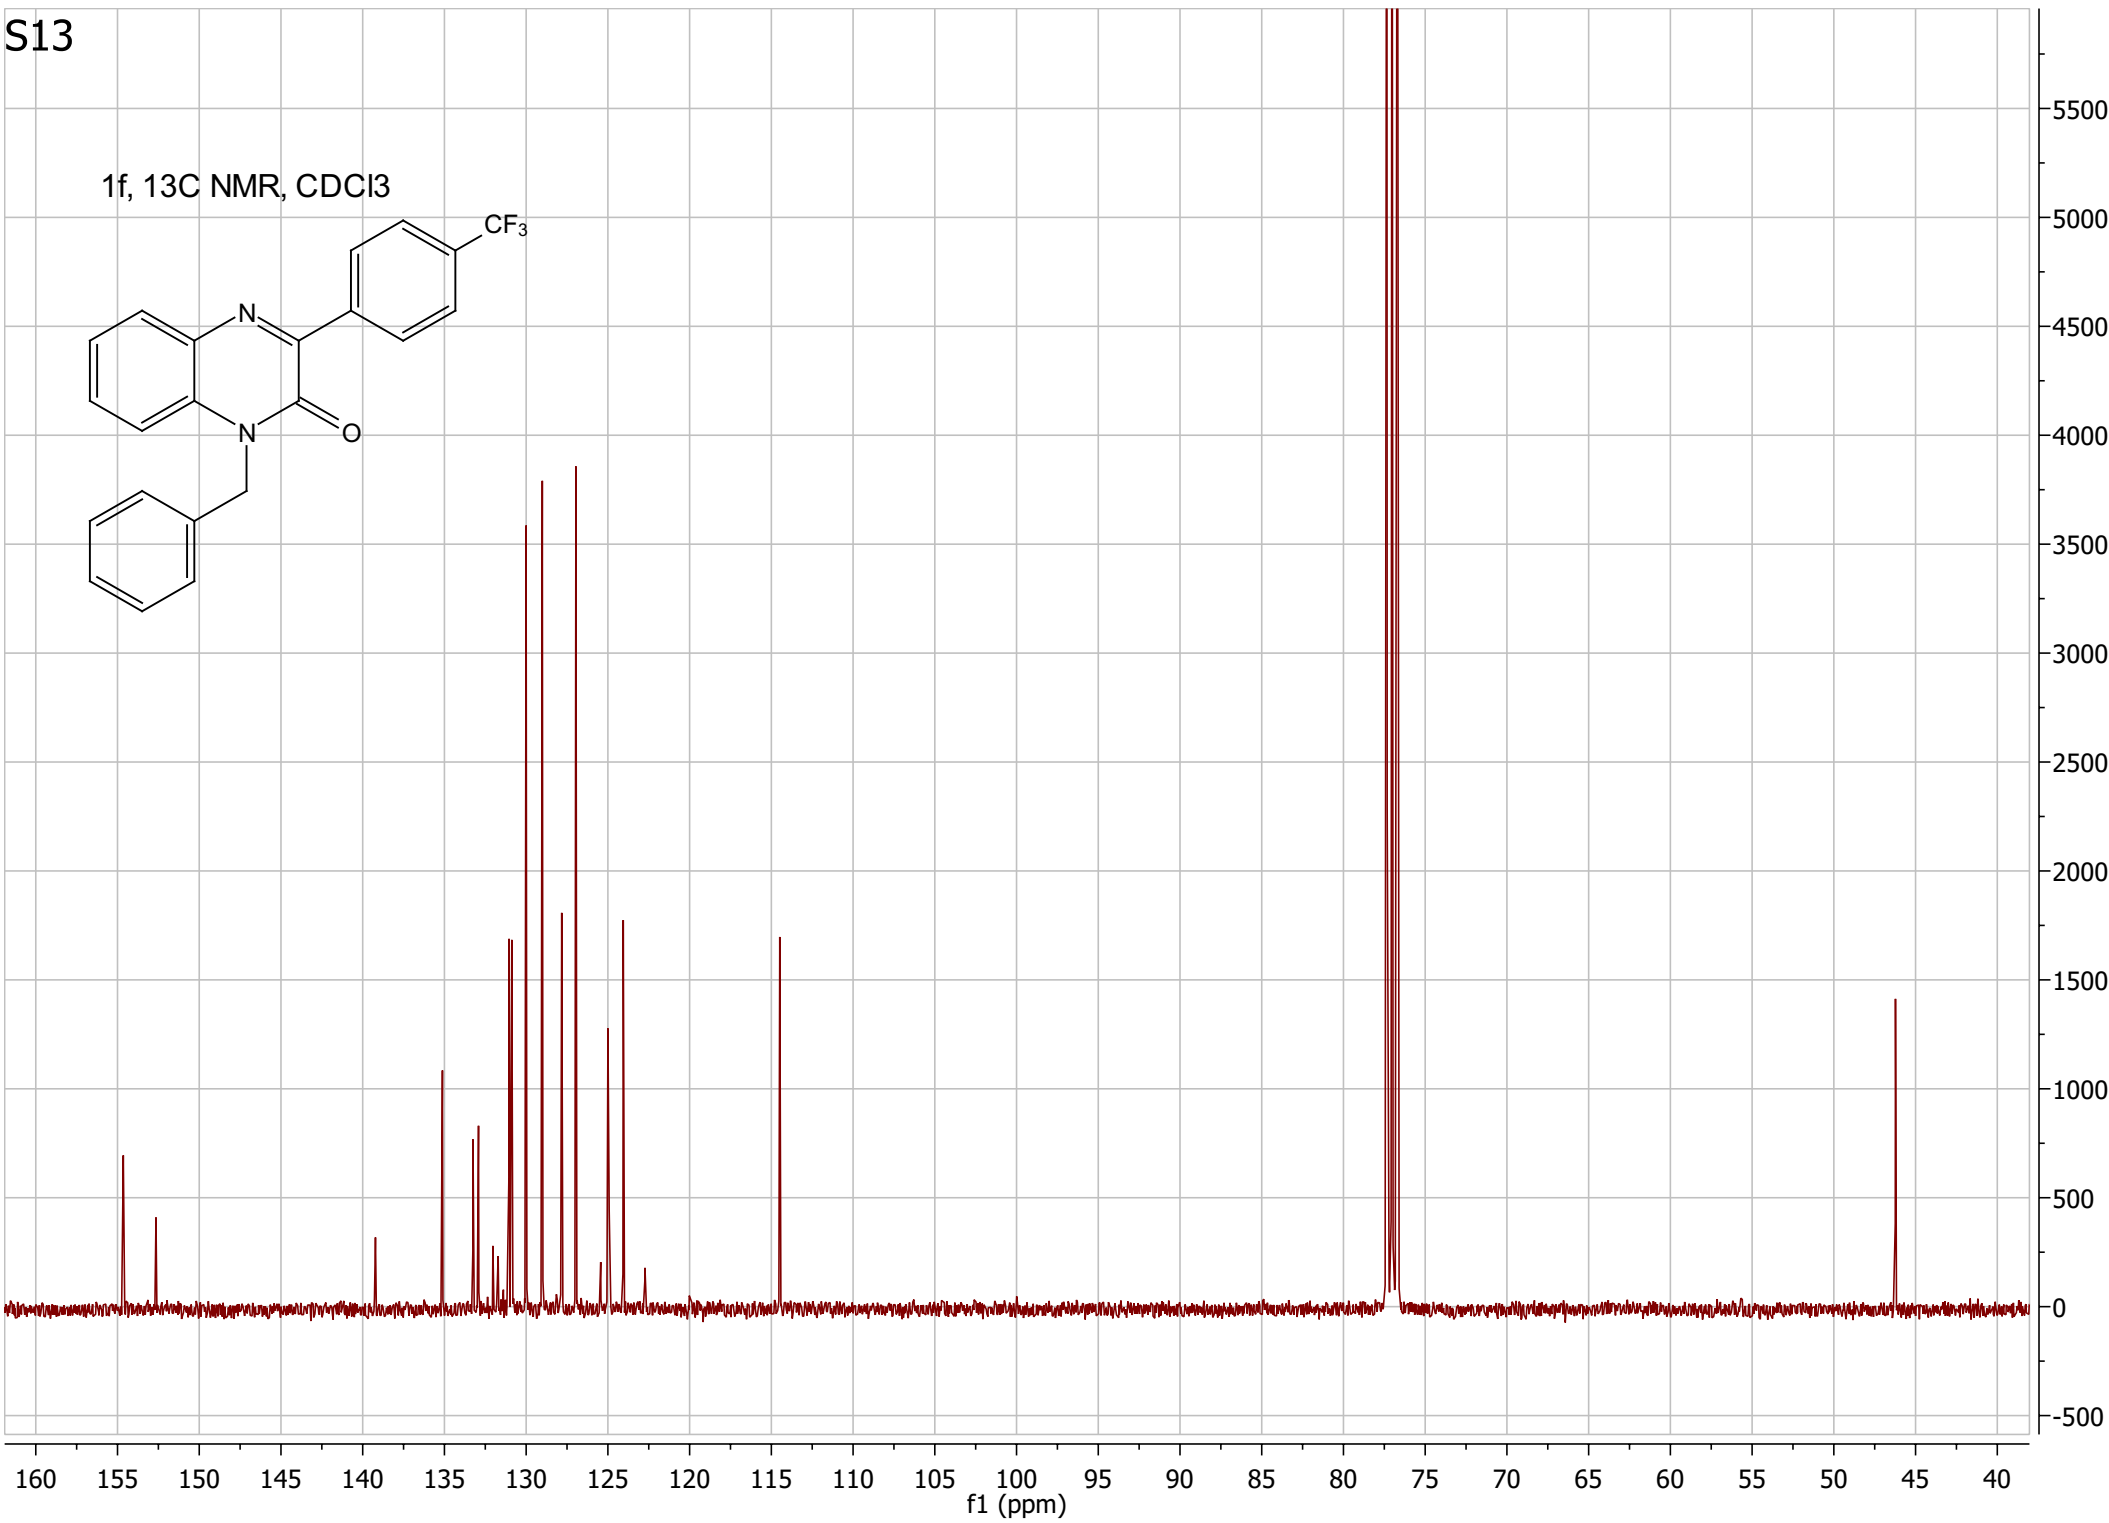

S14

1g, <sup>1</sup>H NMR, CDCl<sub>3</sub>

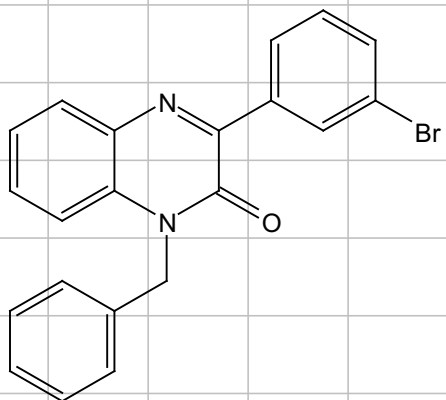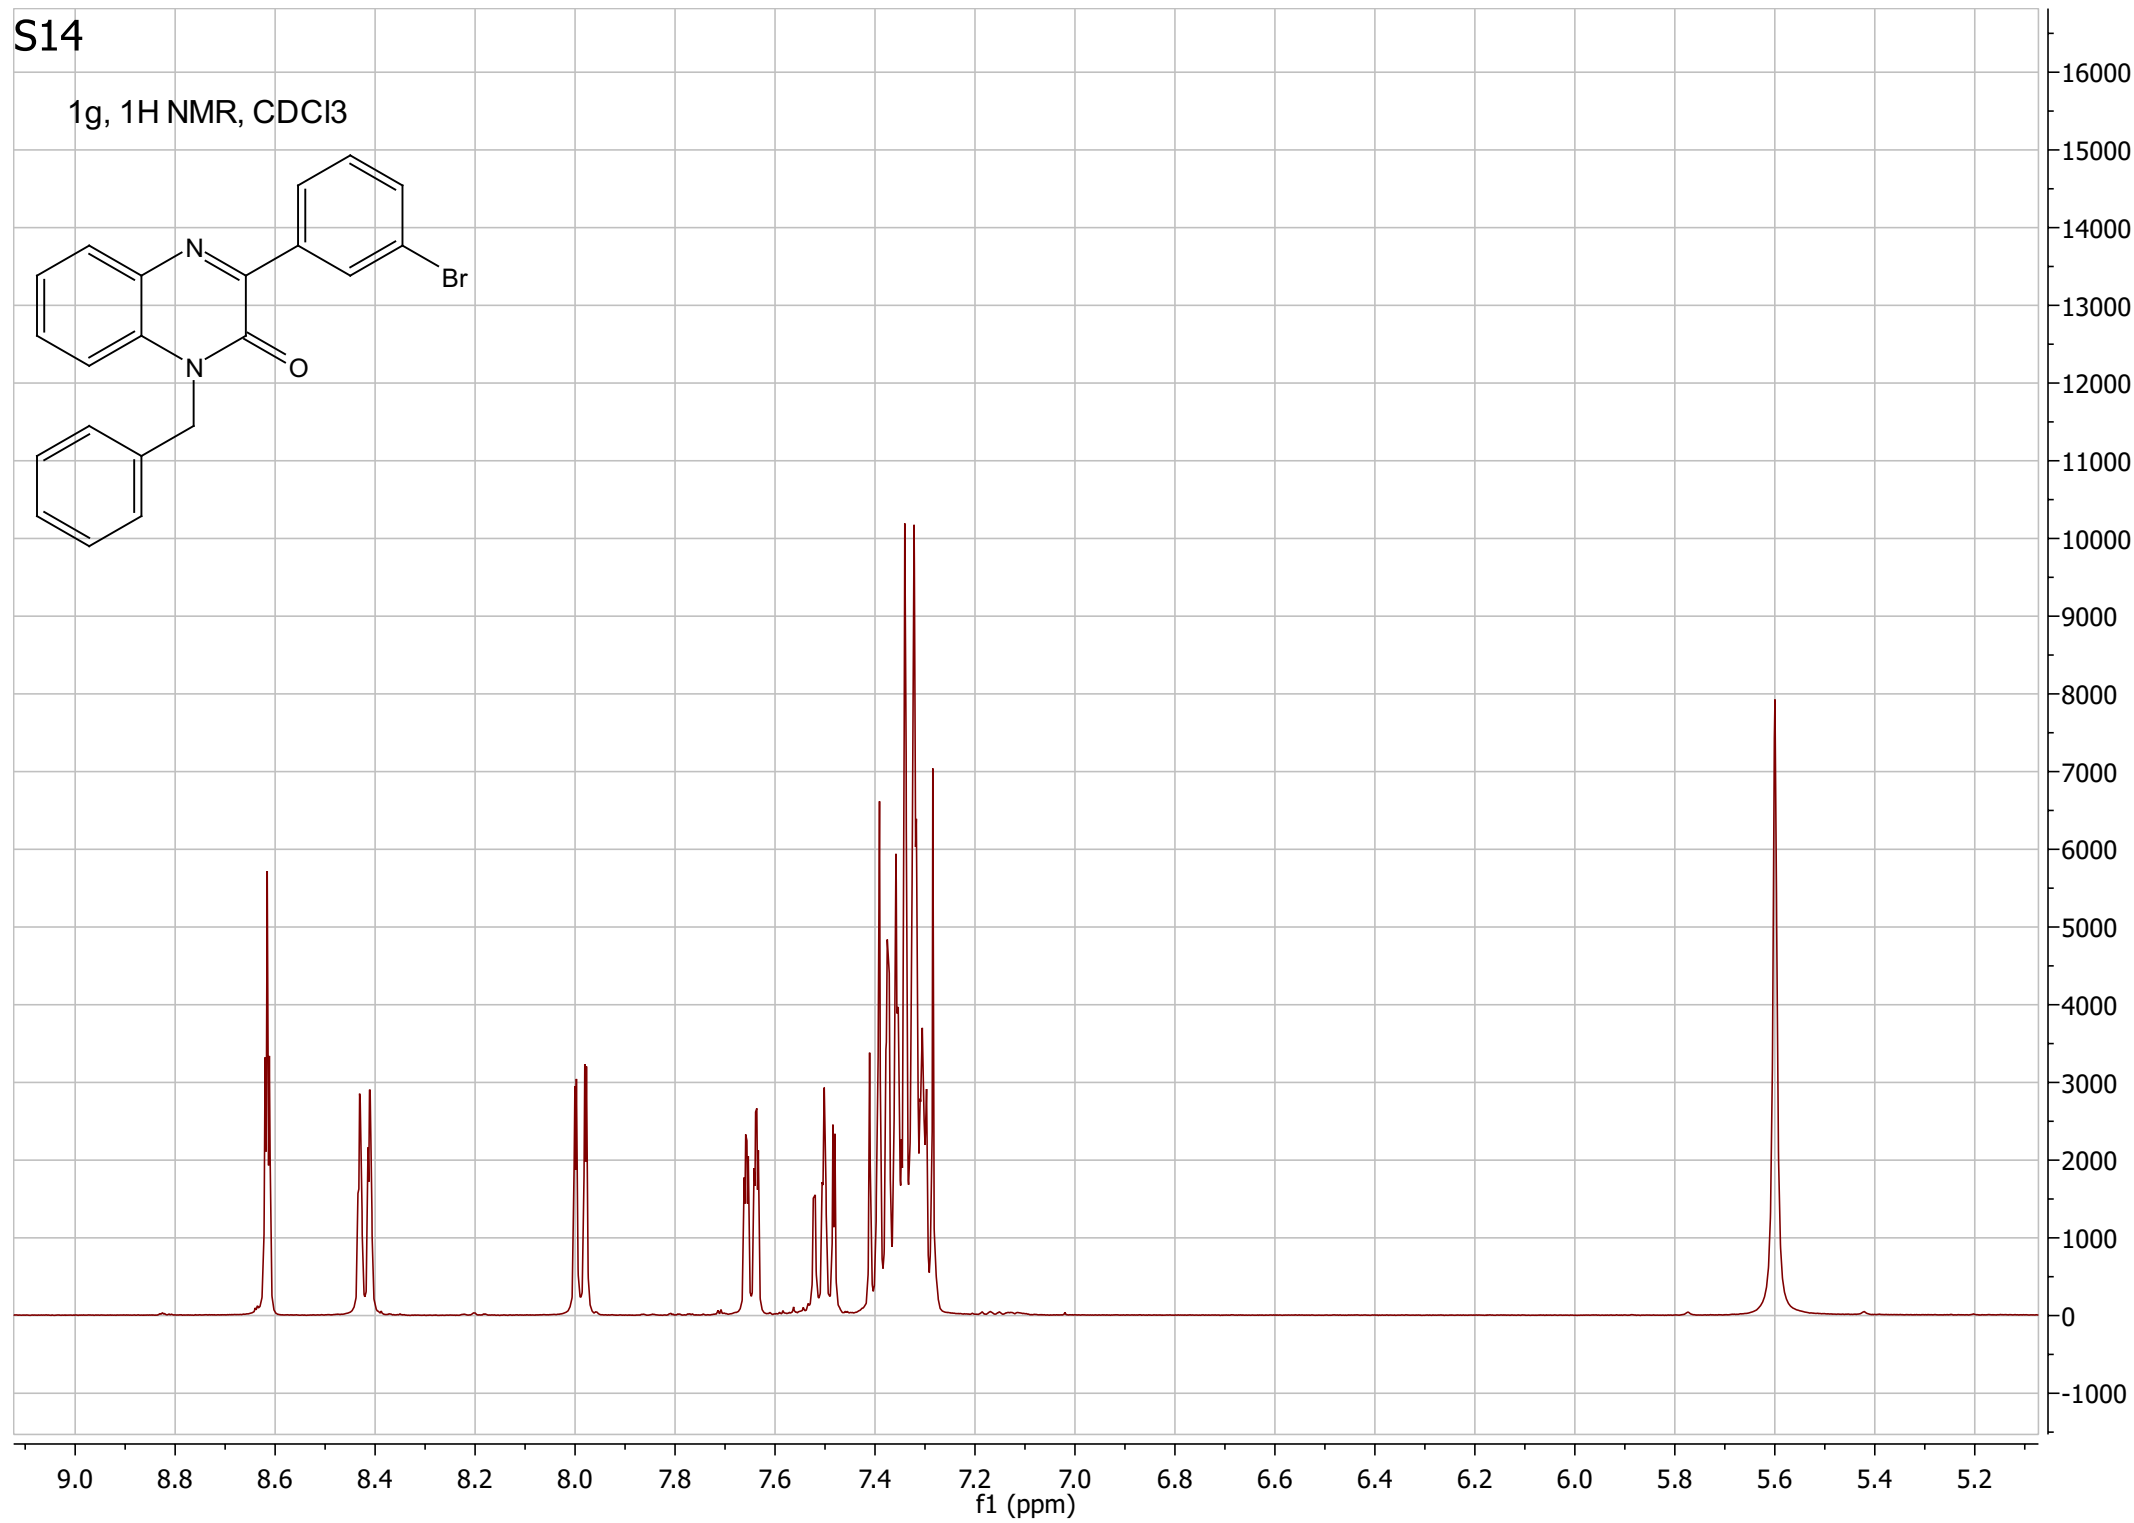

S15

1g, <sup>13</sup>C NMR, CDCl<sub>3</sub>

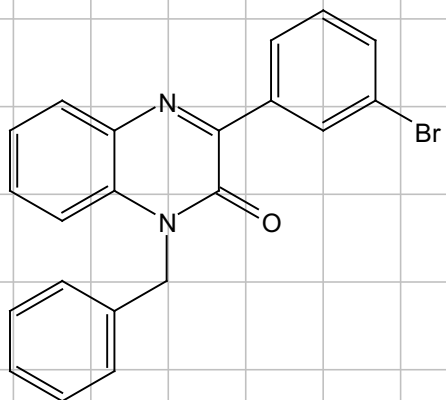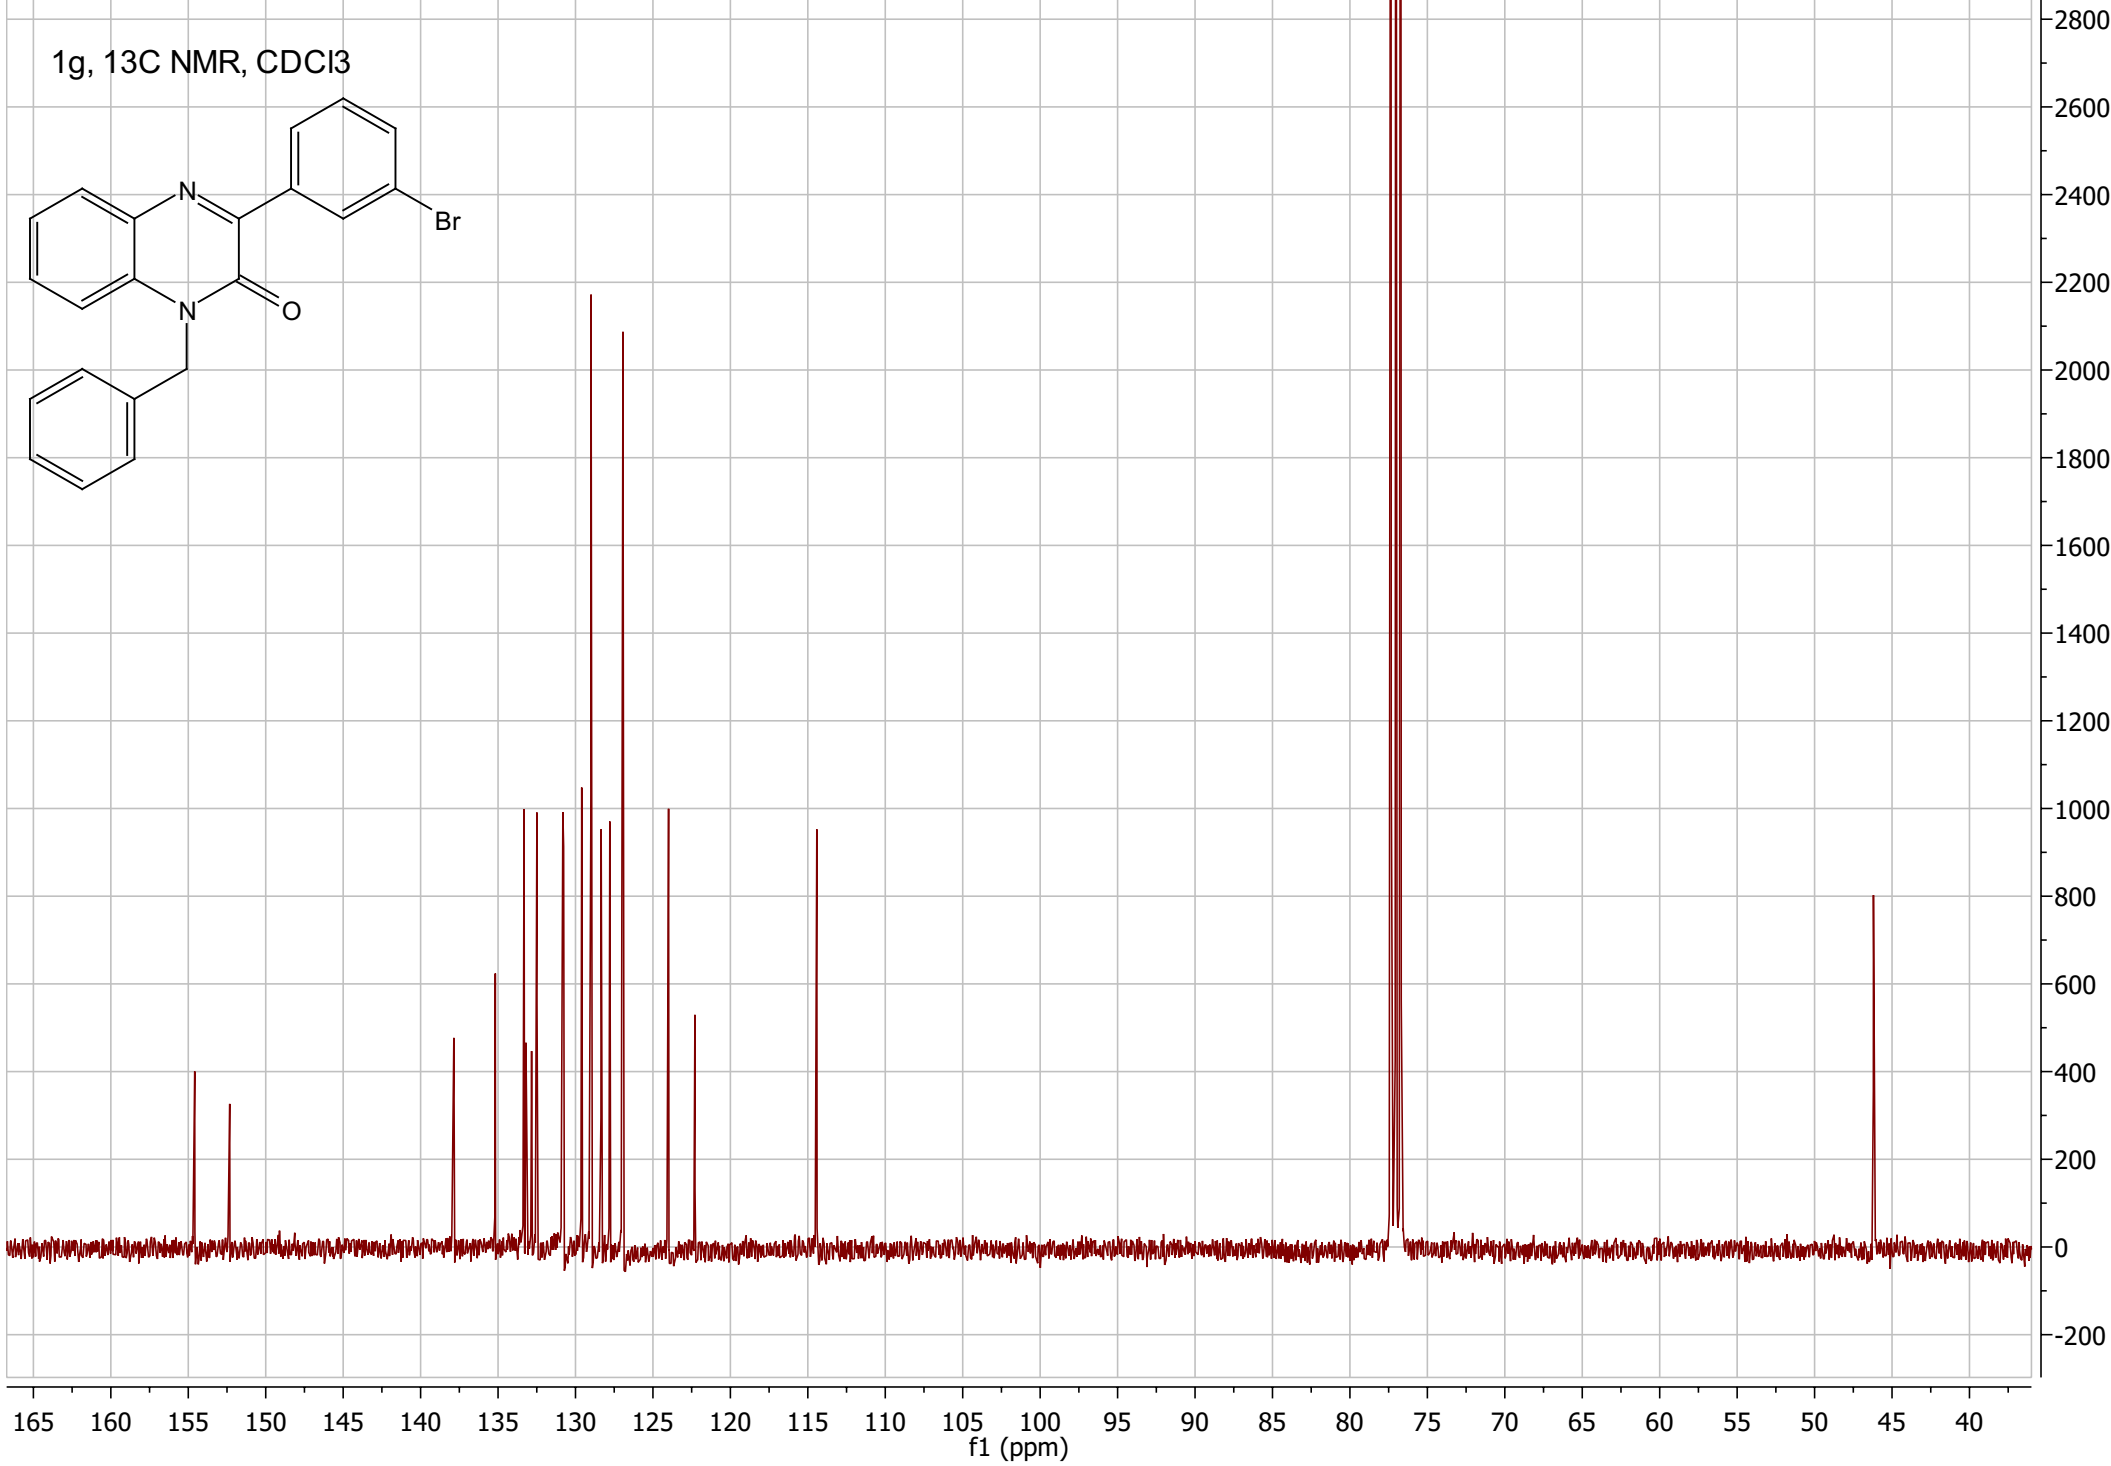

S16

1h, 1H NMR, CDCl3

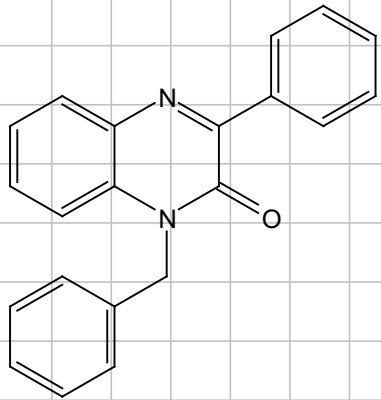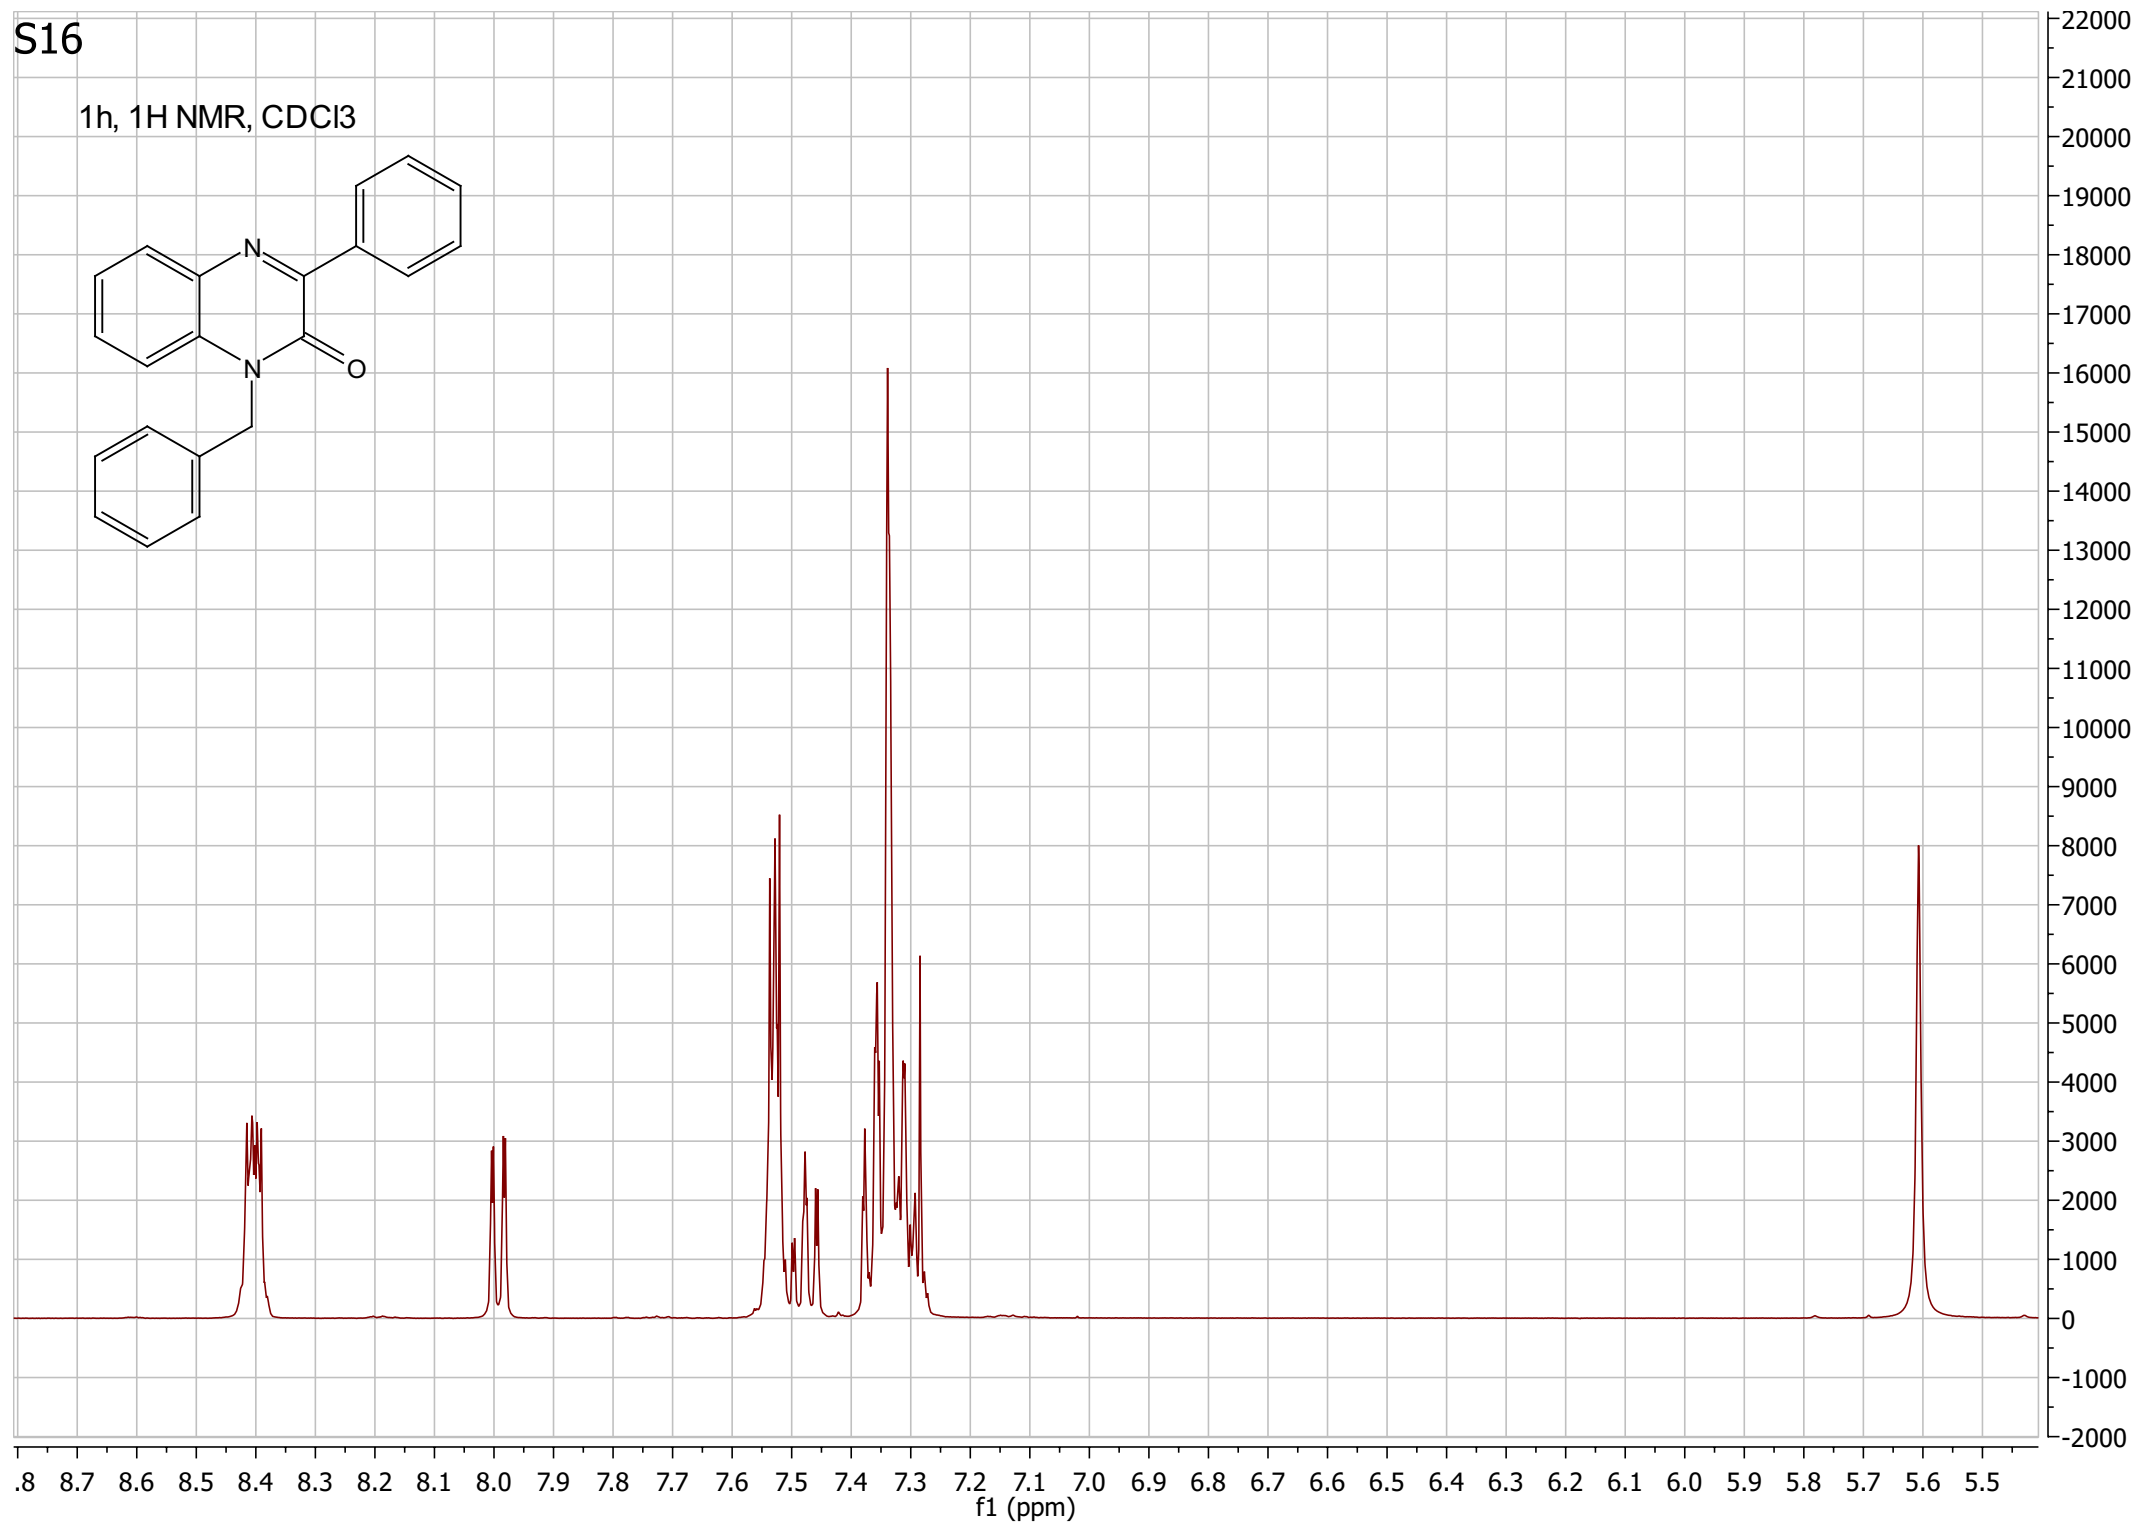



S17

1h, <sup>13</sup>C NMR, CDCl<sub>3</sub>

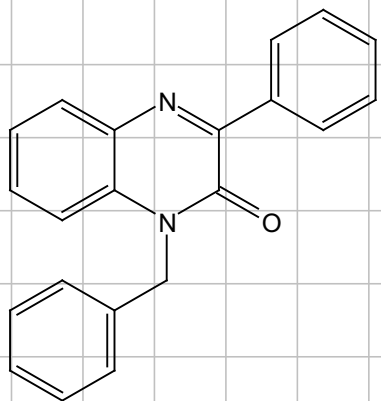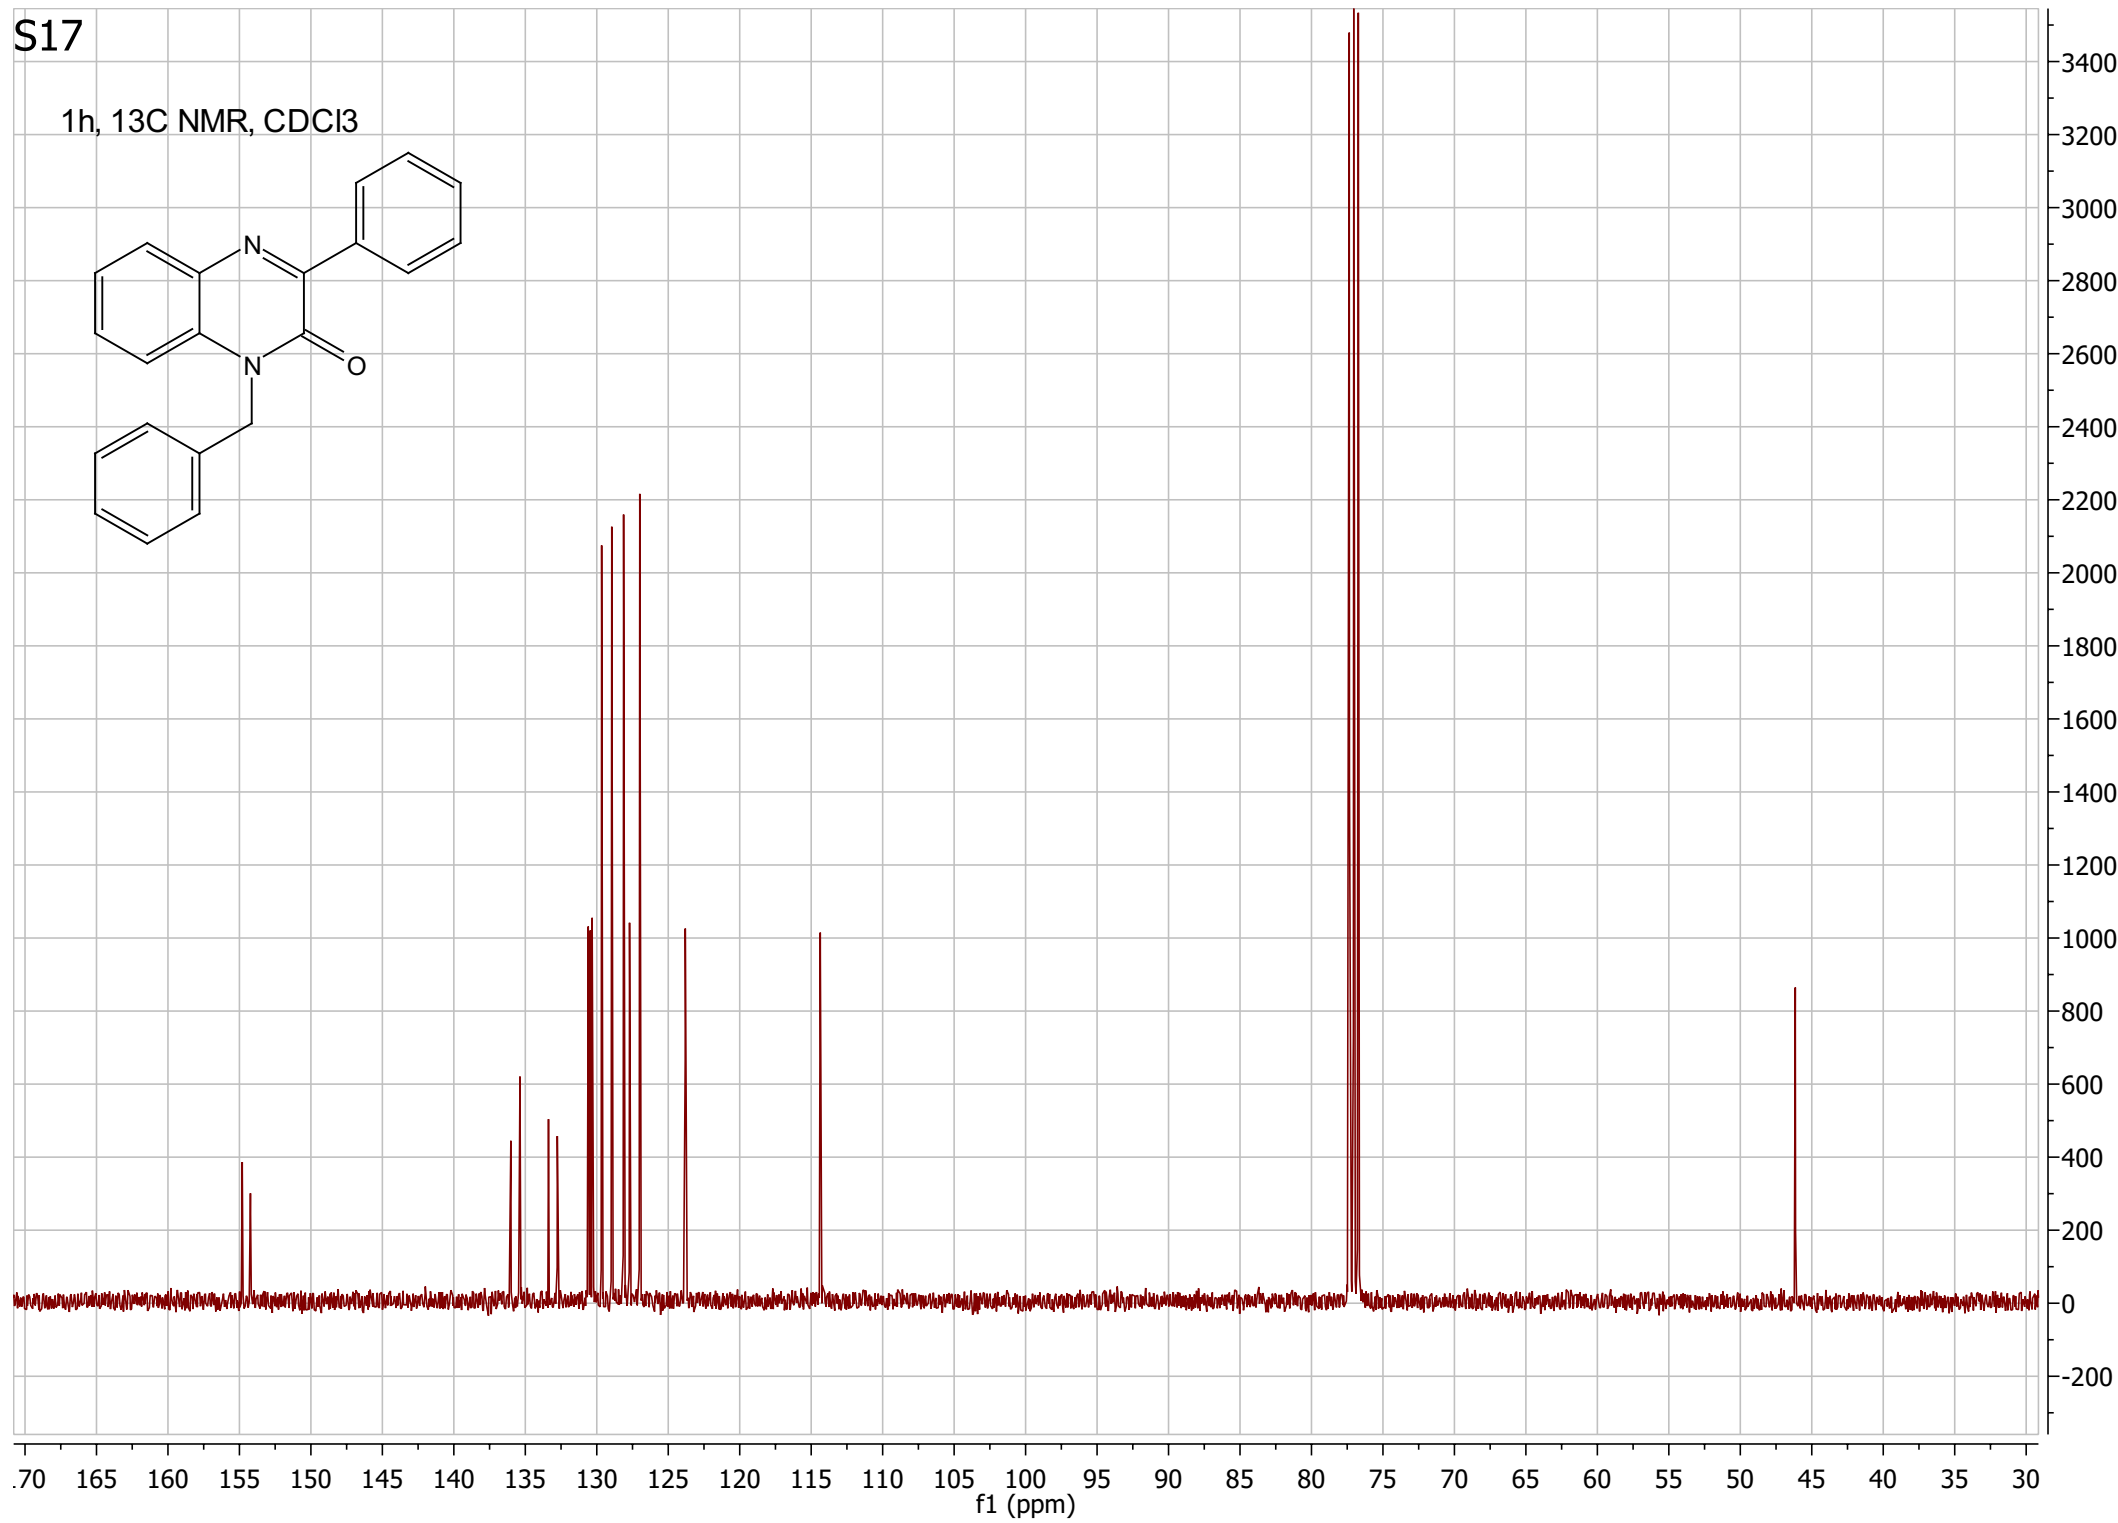

S18

1i, <sup>13</sup>C NMR, CDCl<sub>3</sub>

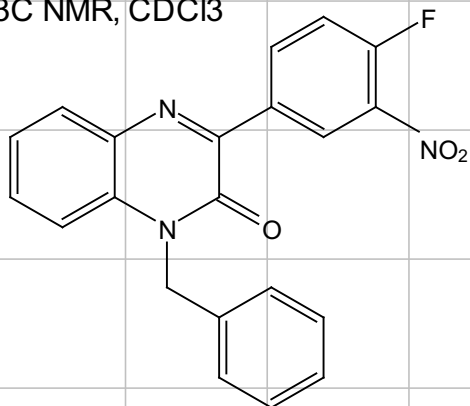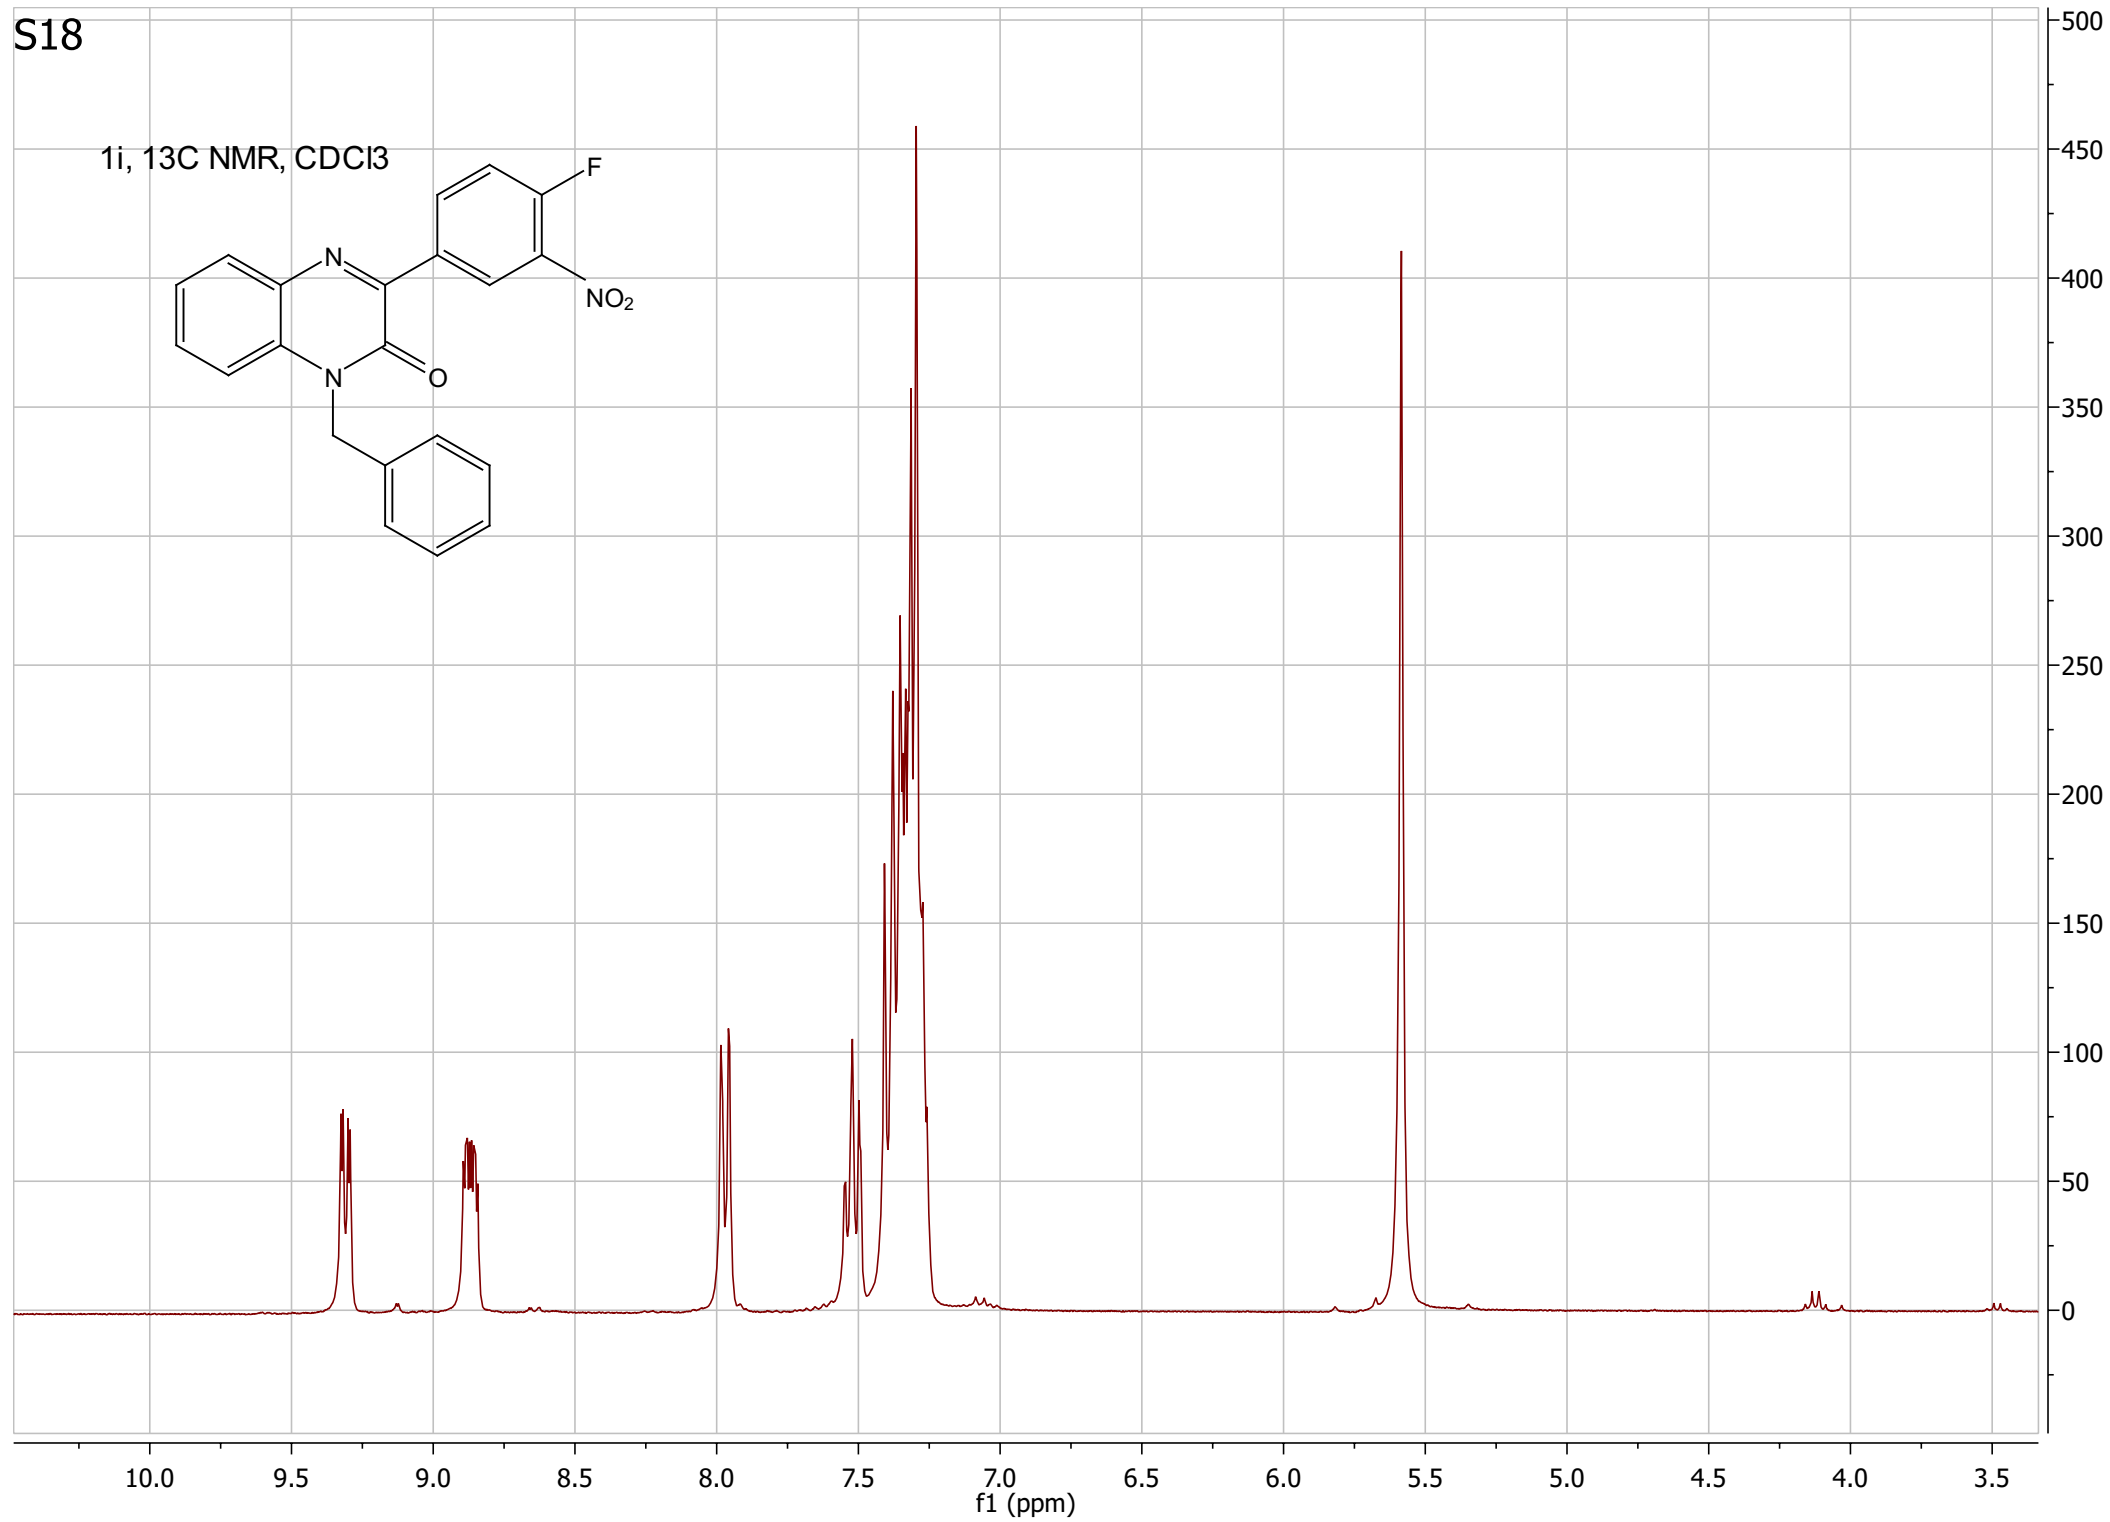

S19

1i, <sup>13</sup>C NMR, CDCl<sub>3</sub>

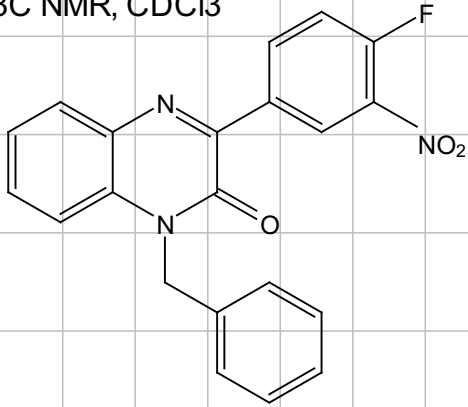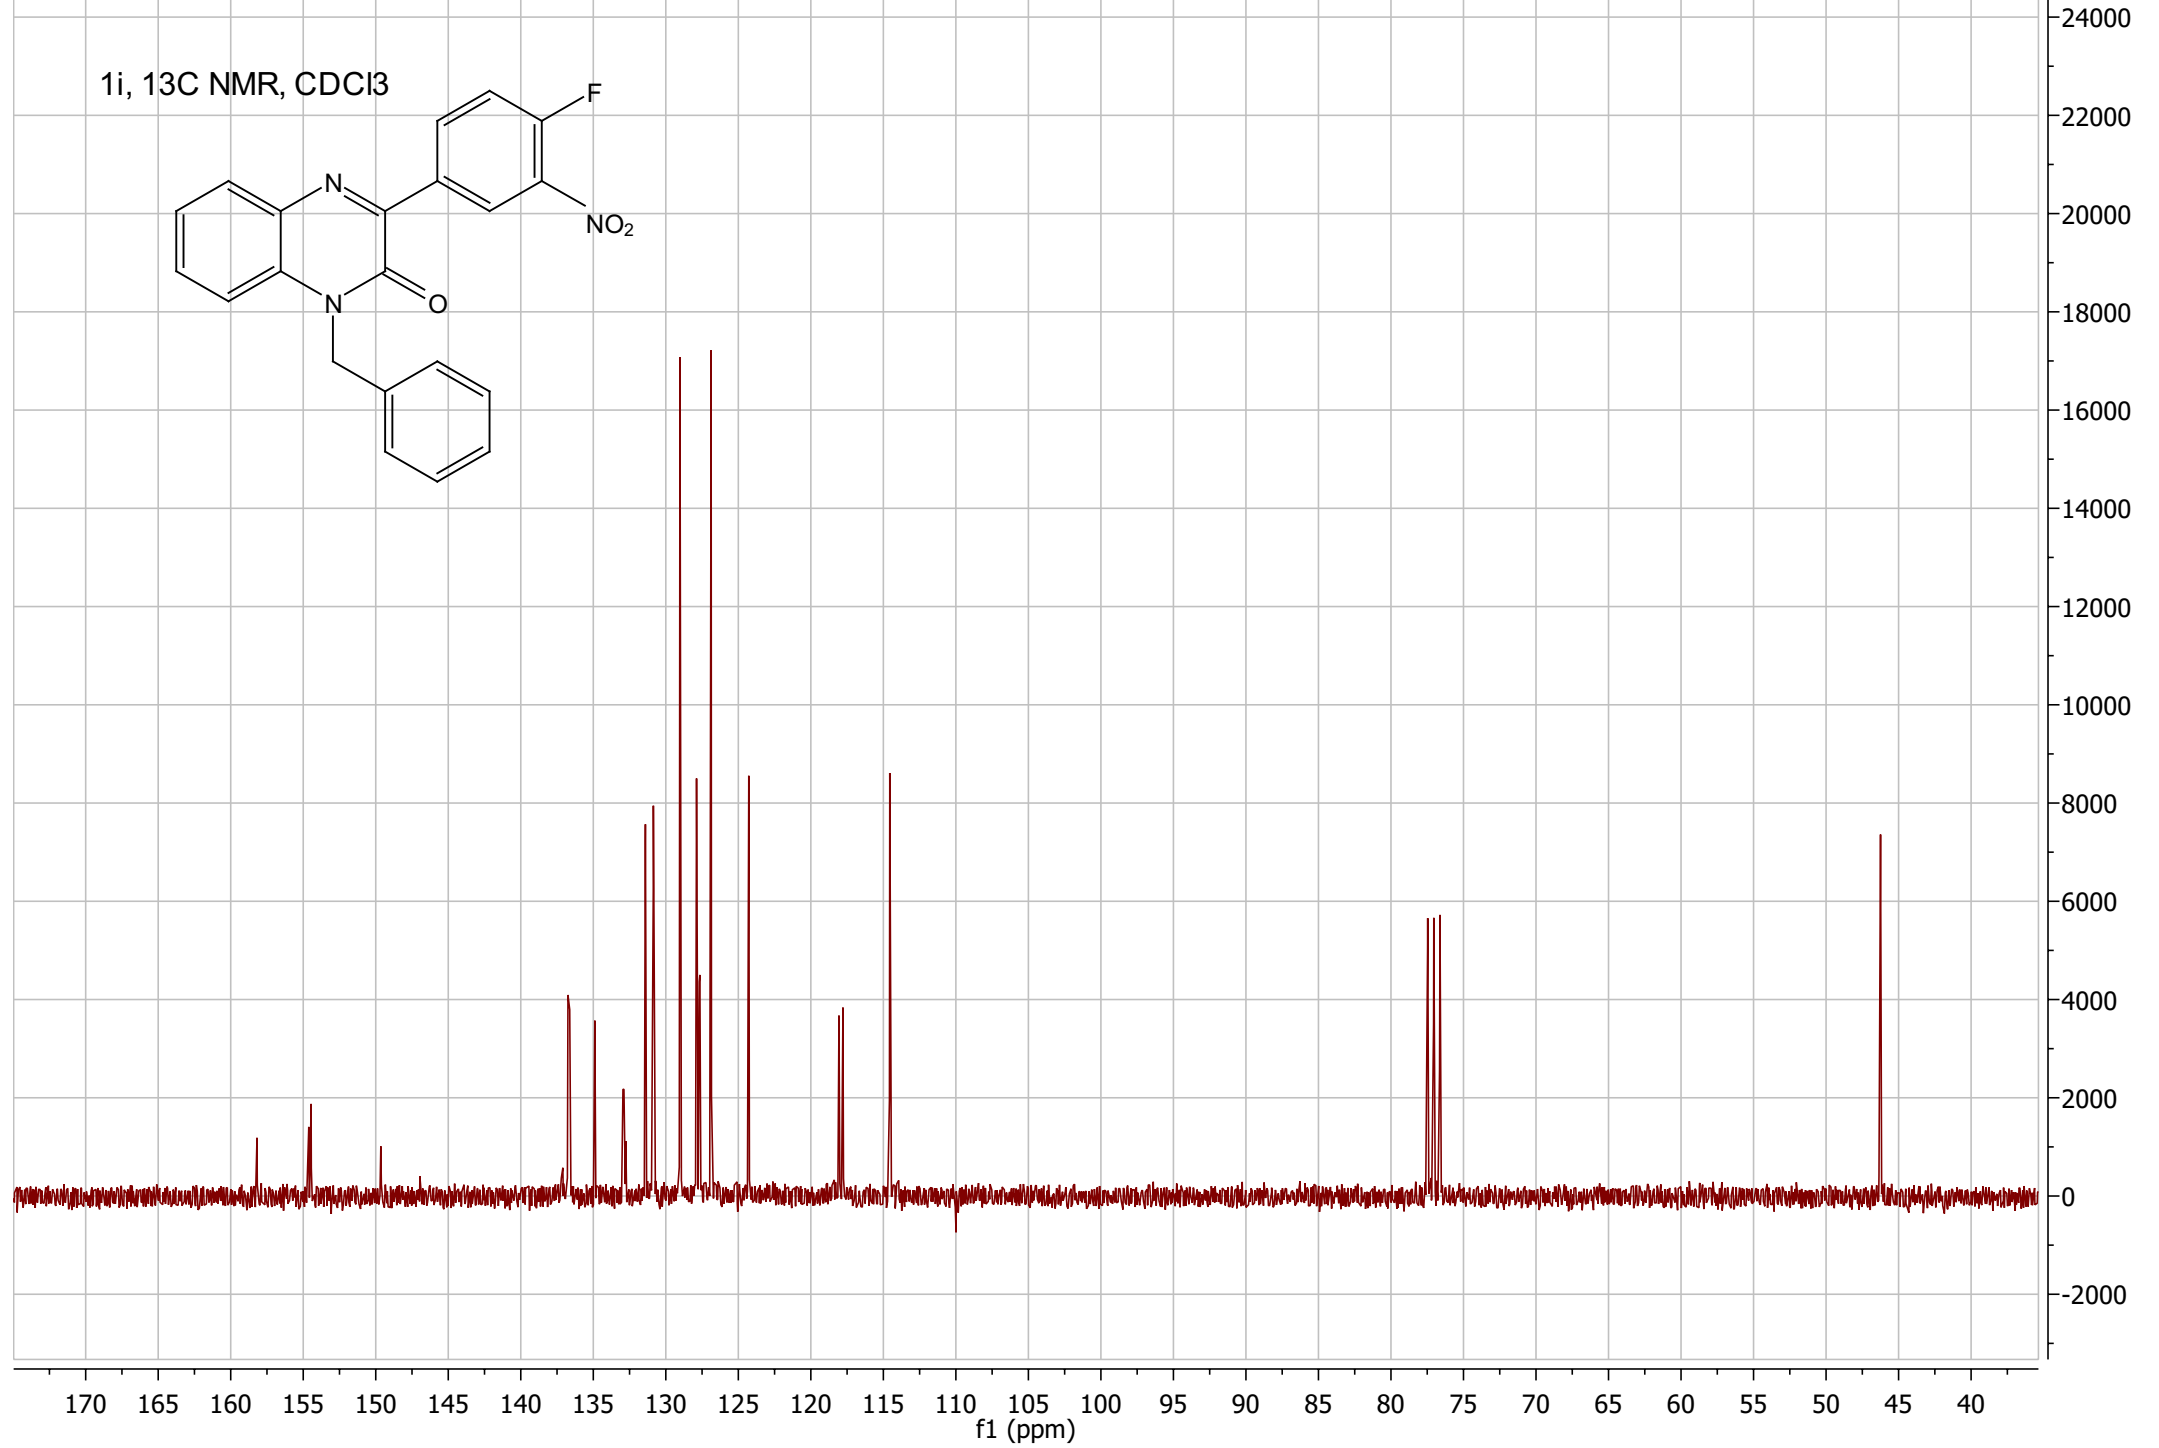

S20

1j, <sup>1</sup>H NMR, CDCl<sub>3</sub>

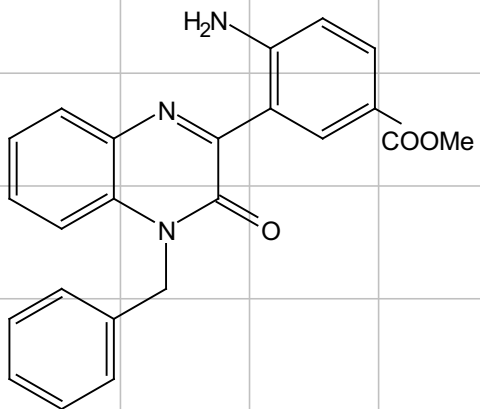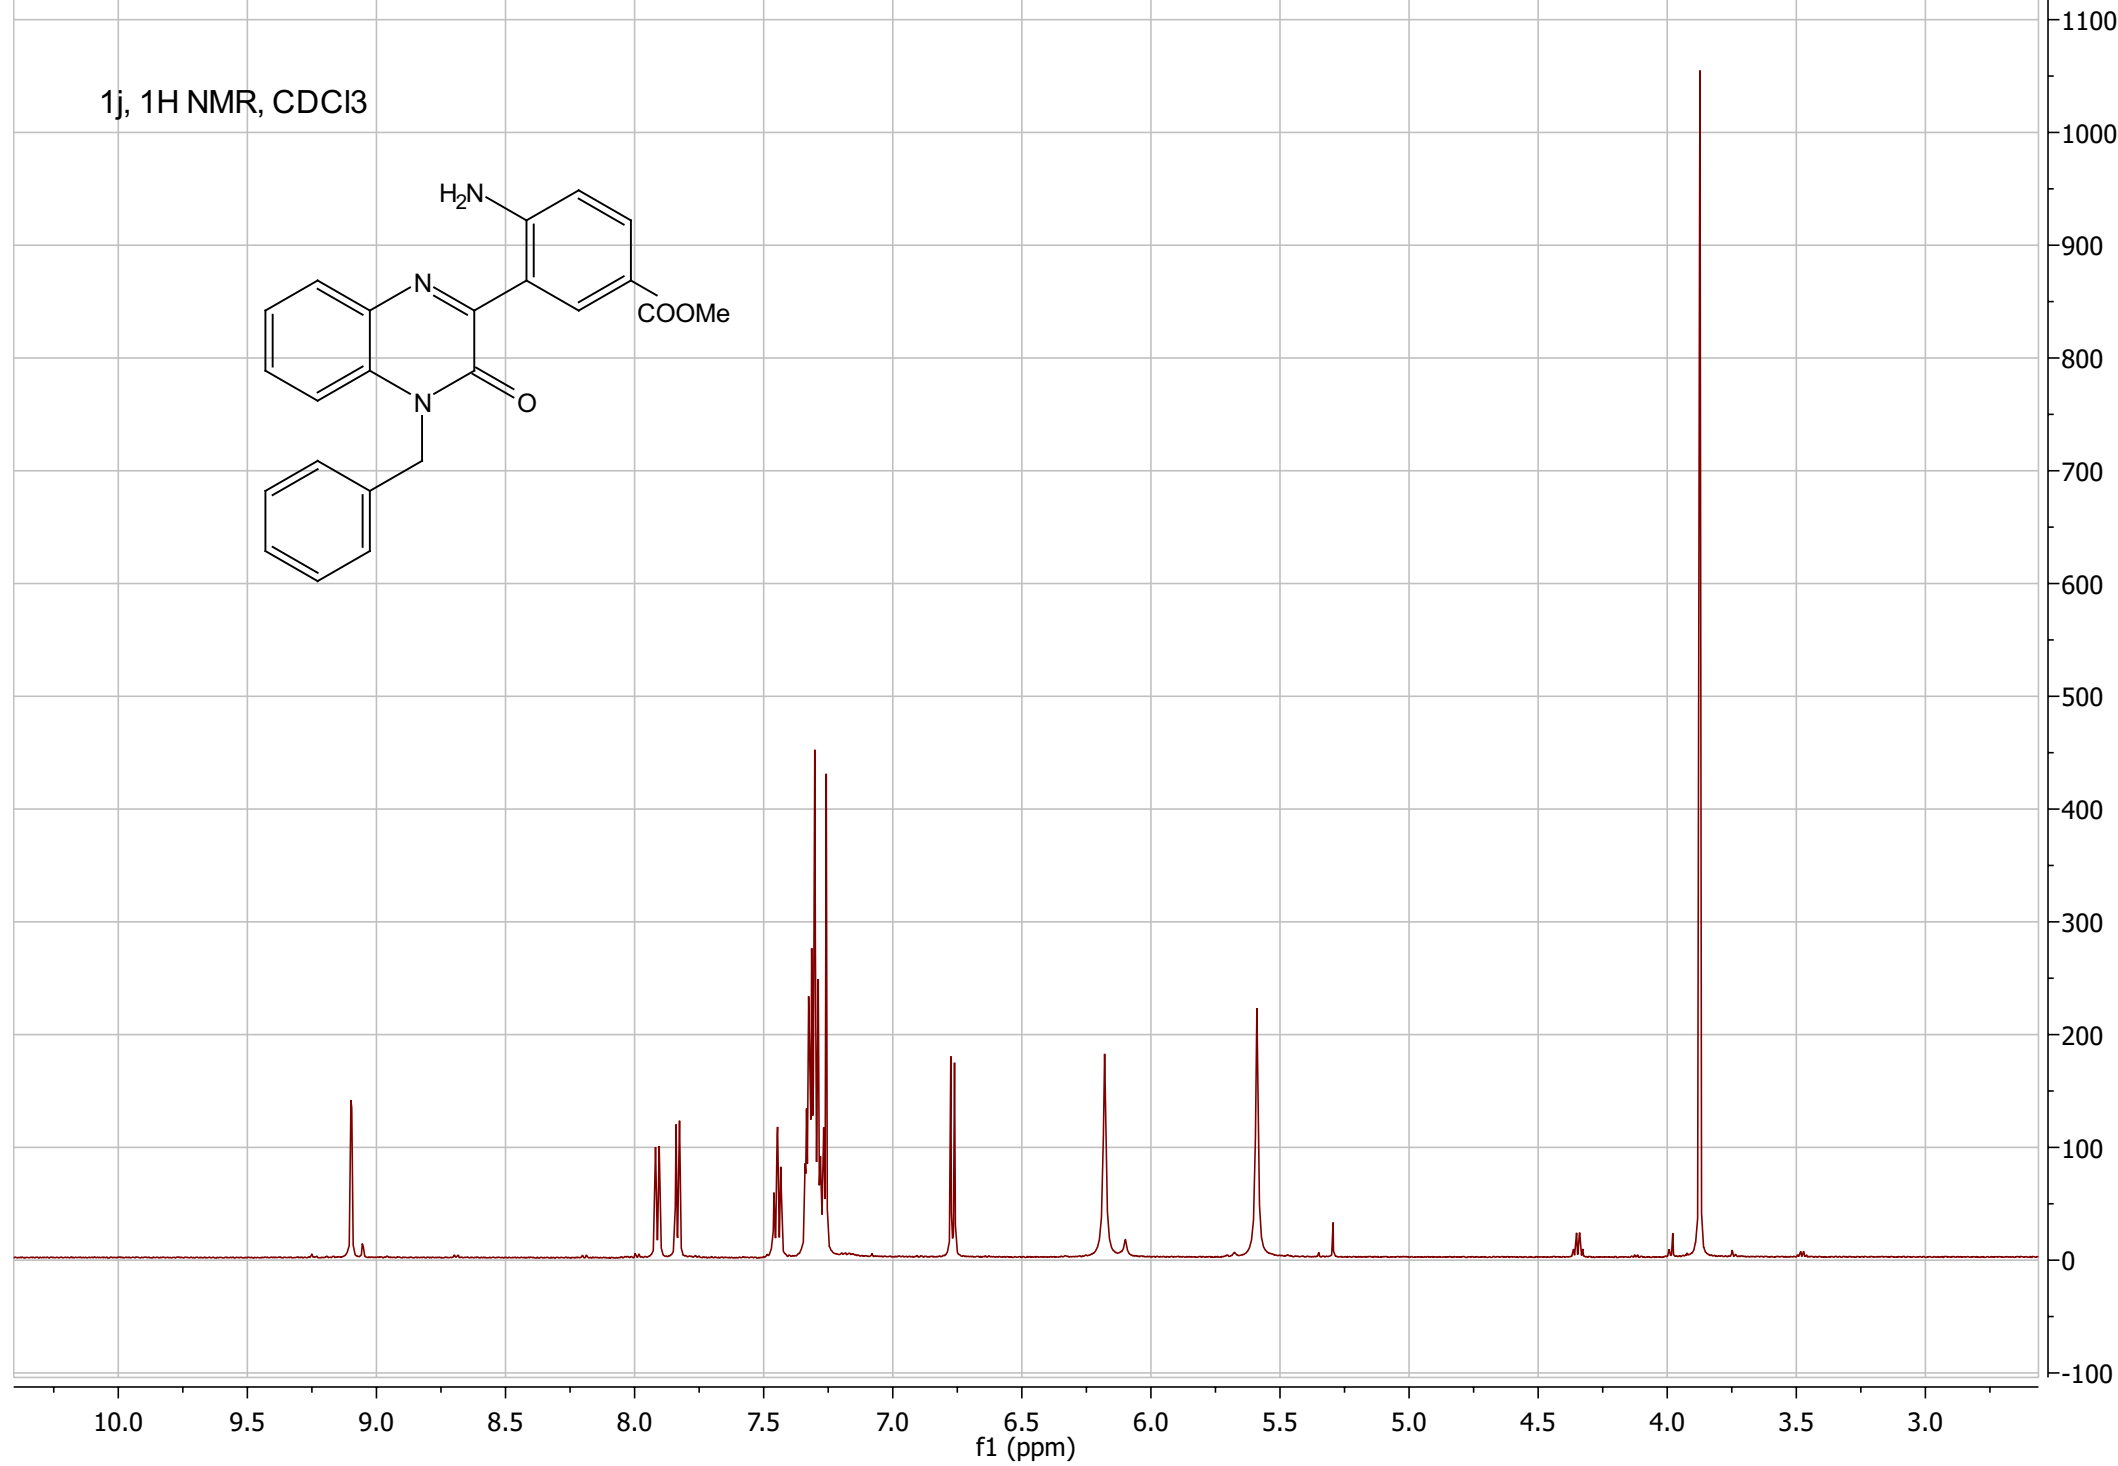

S21

1j, <sup>13</sup>C NMR, CDCl<sub>3</sub>

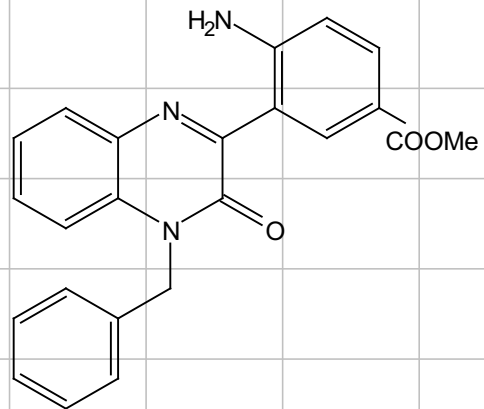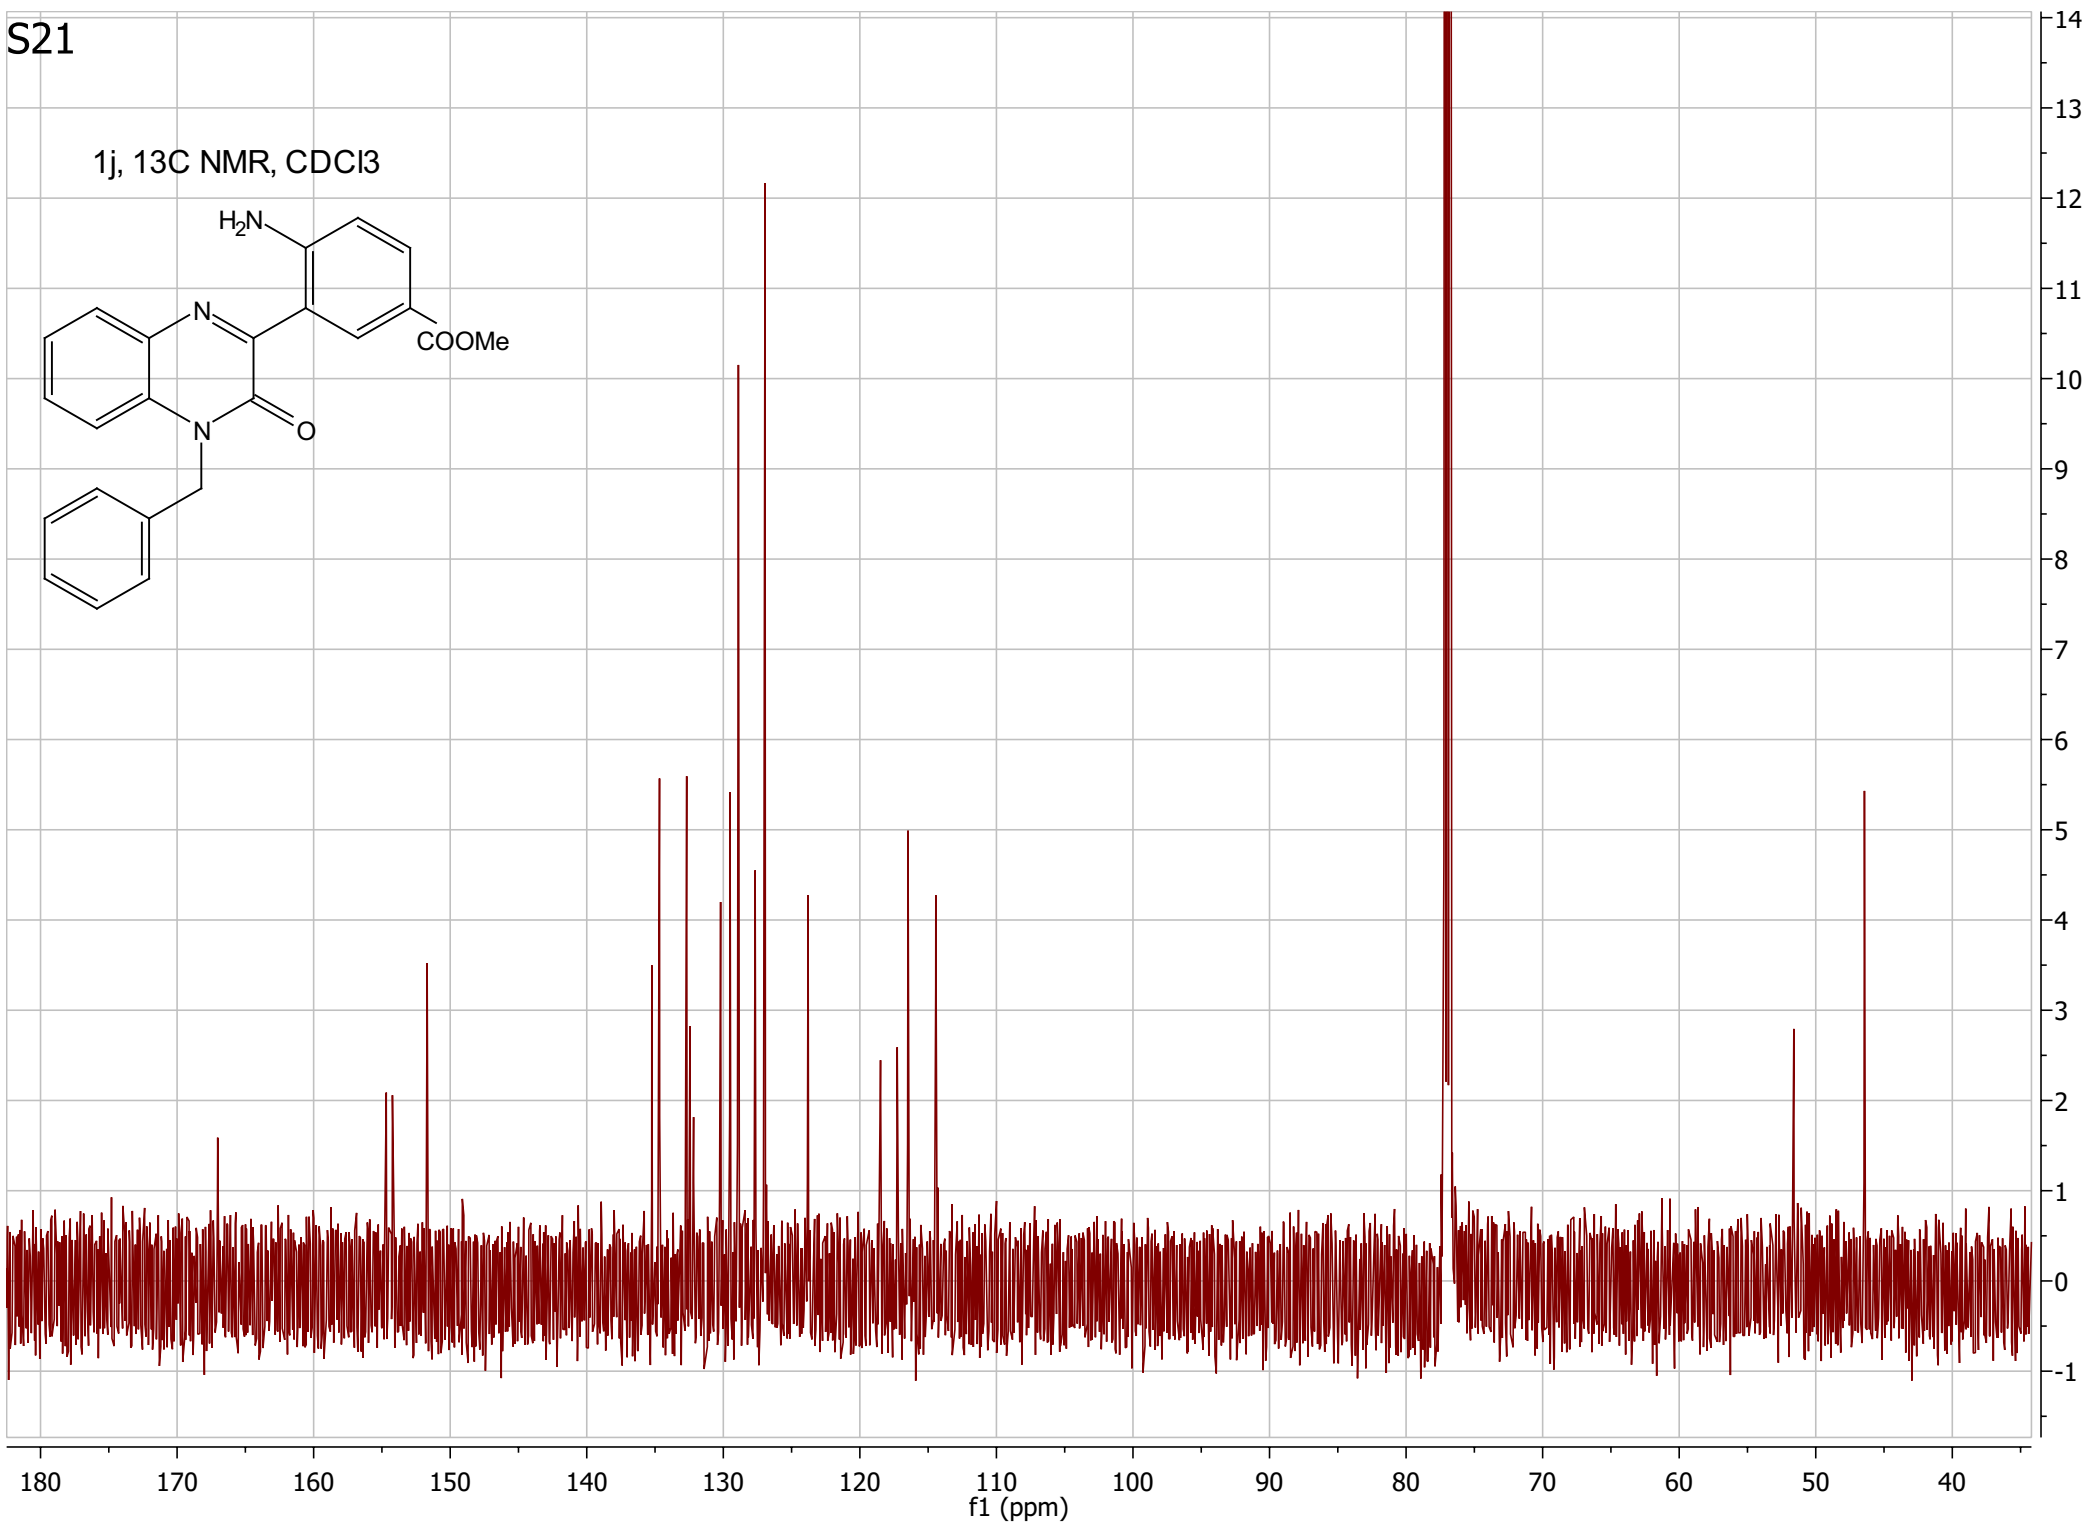

S22

1k, 1H NMR, acetone-d6

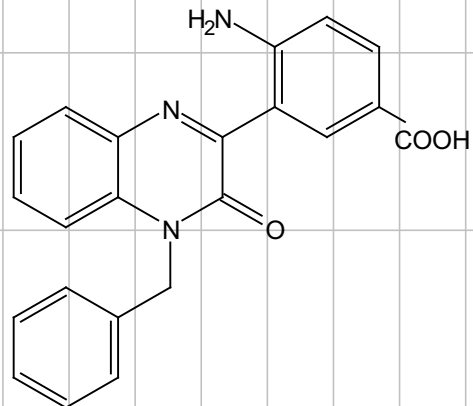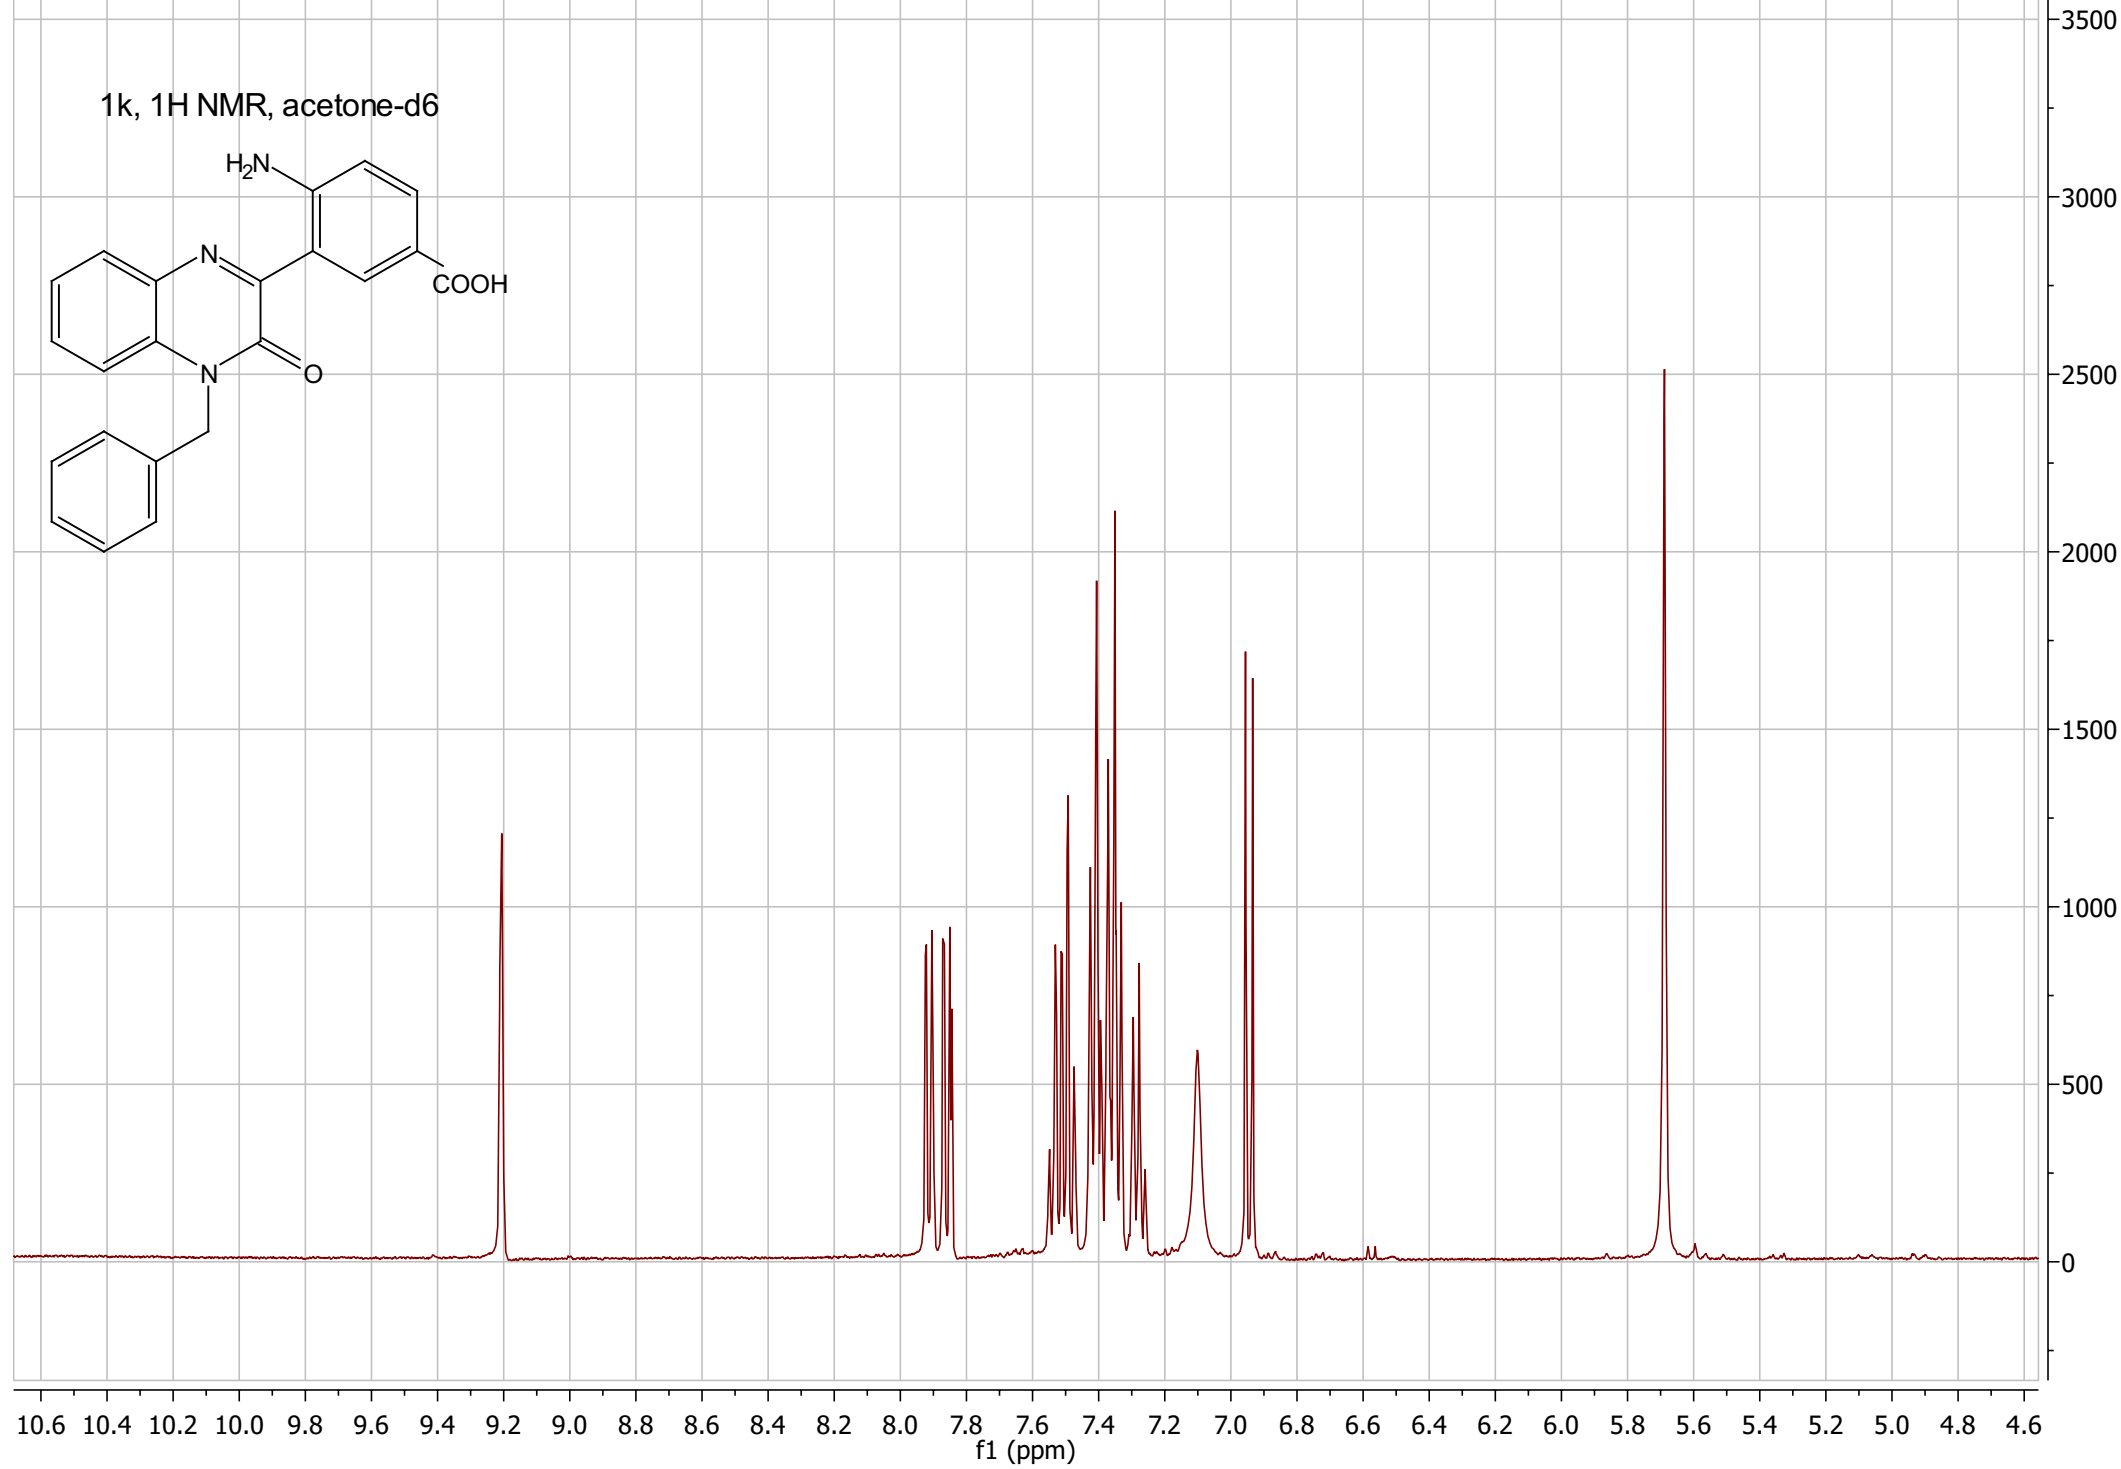

S23

1k, <sup>13</sup>C NMR, acetone-d<sub>6</sub>

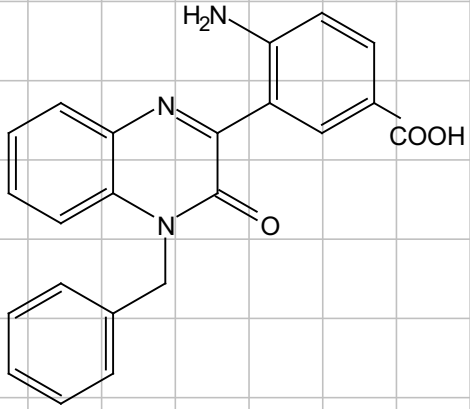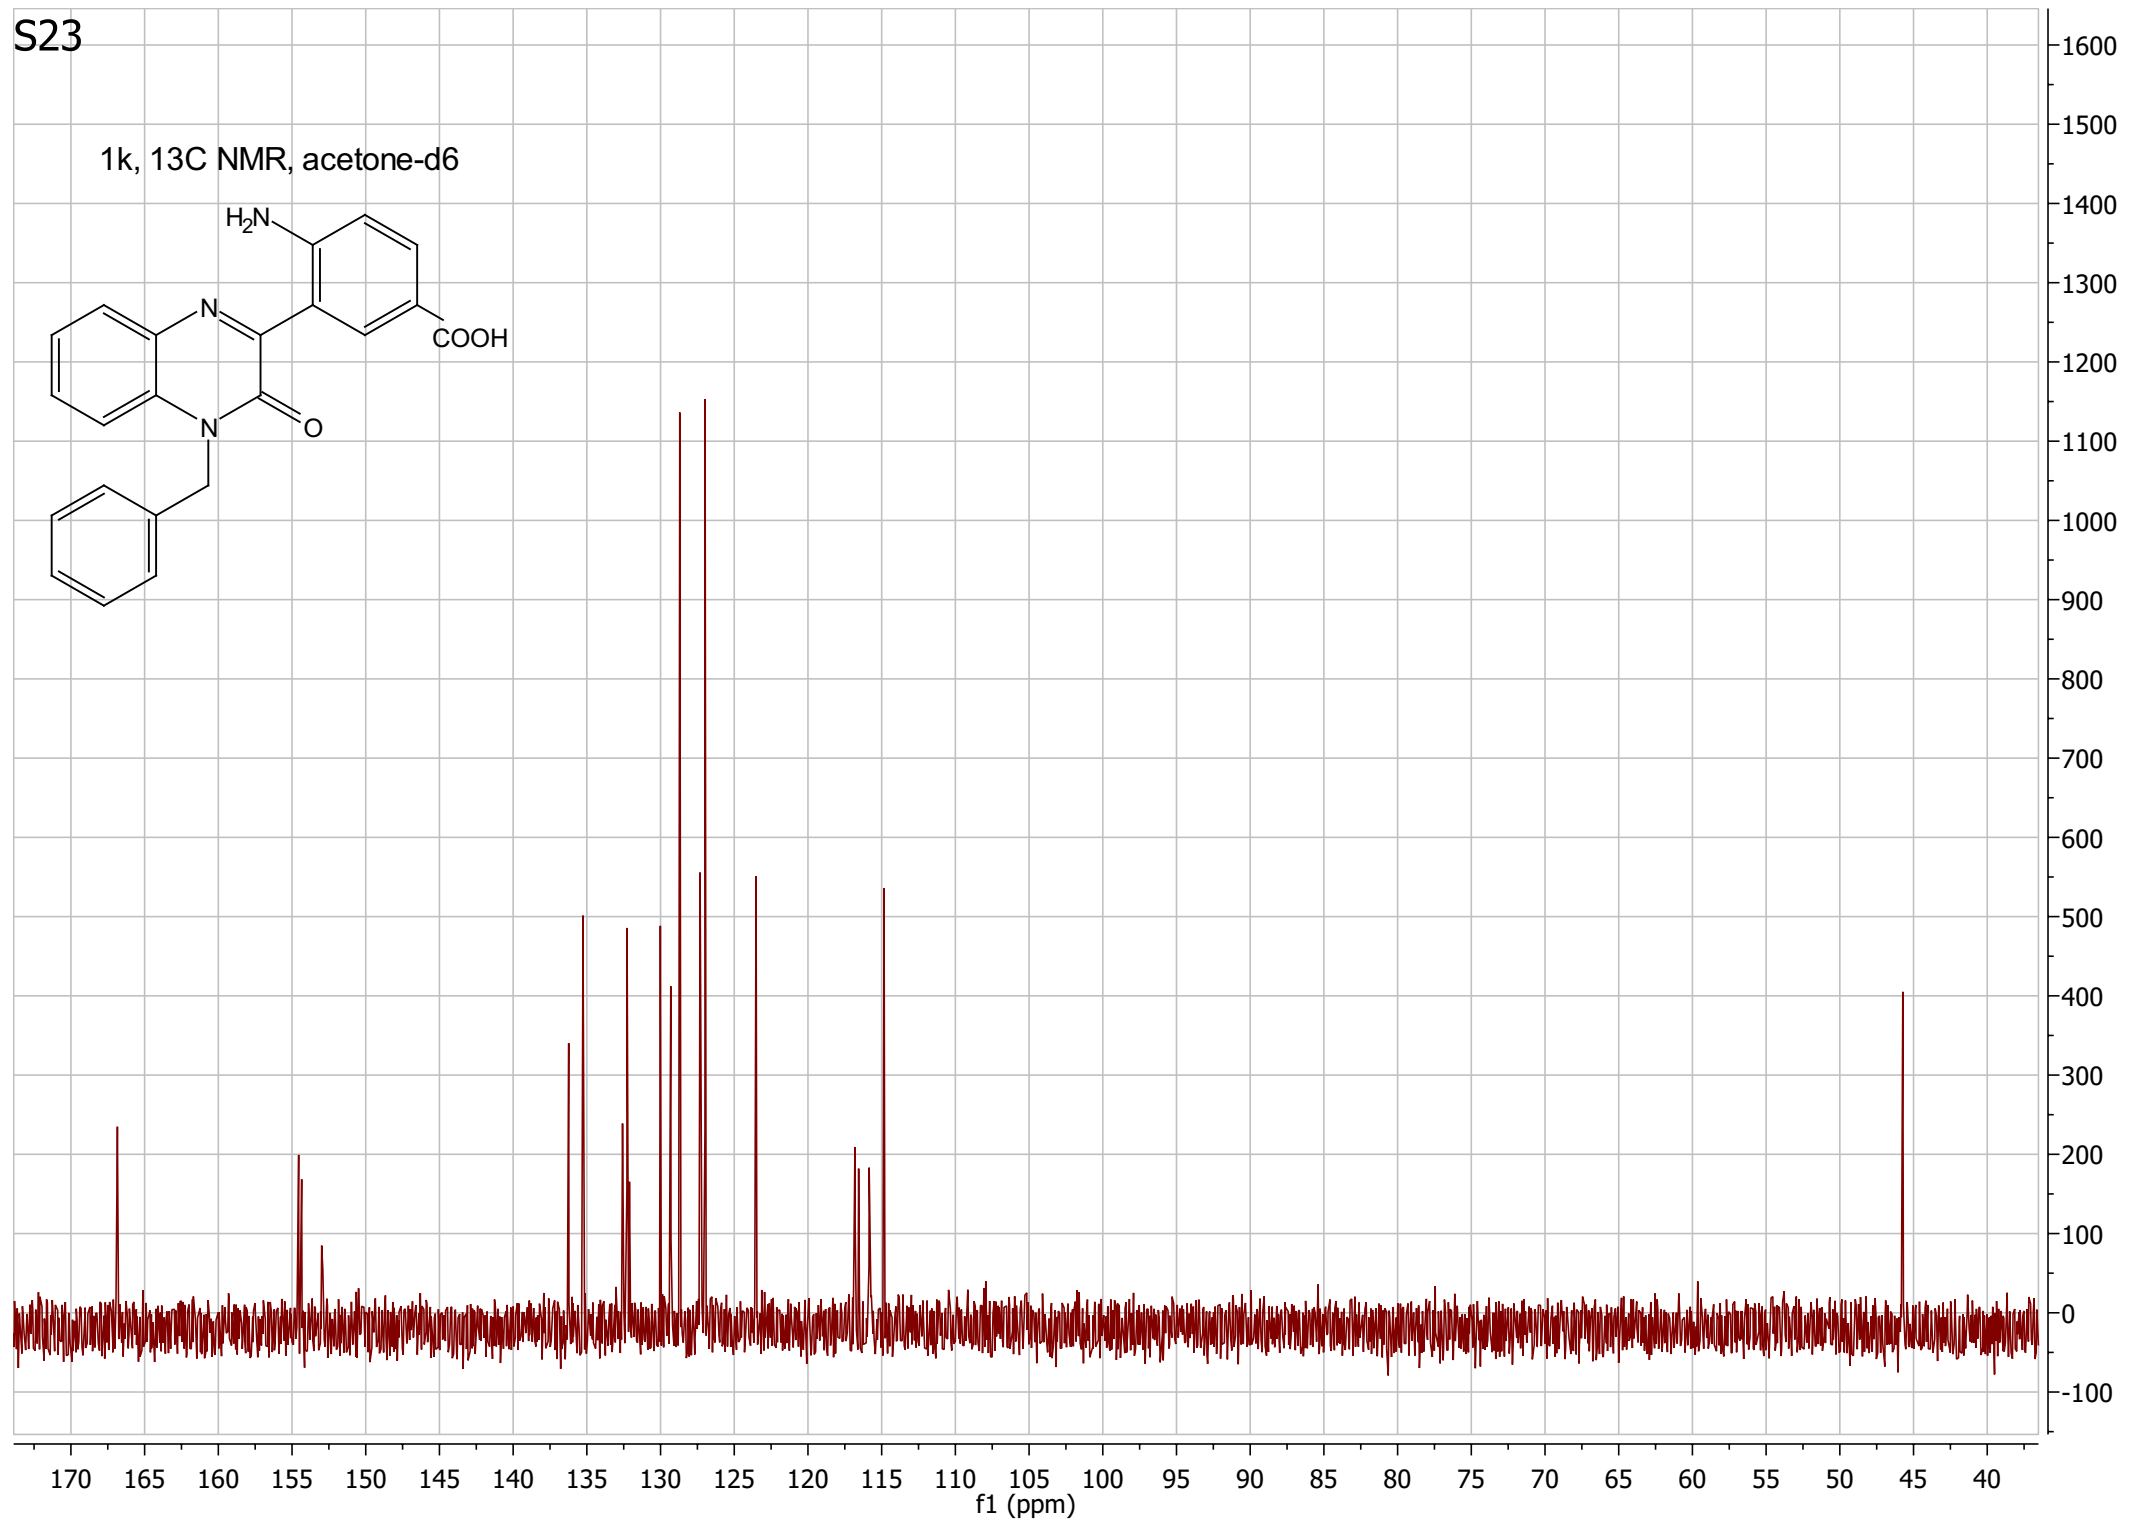

S24

11, <sup>1</sup>H NMR, CDCl<sub>3</sub>

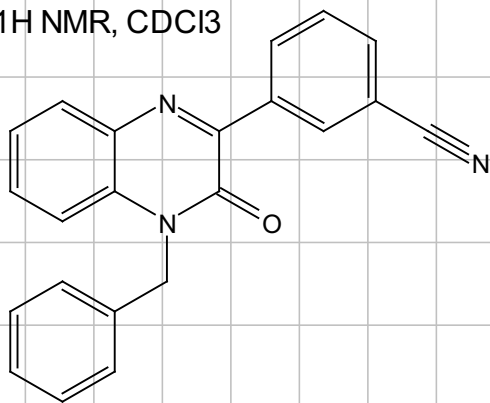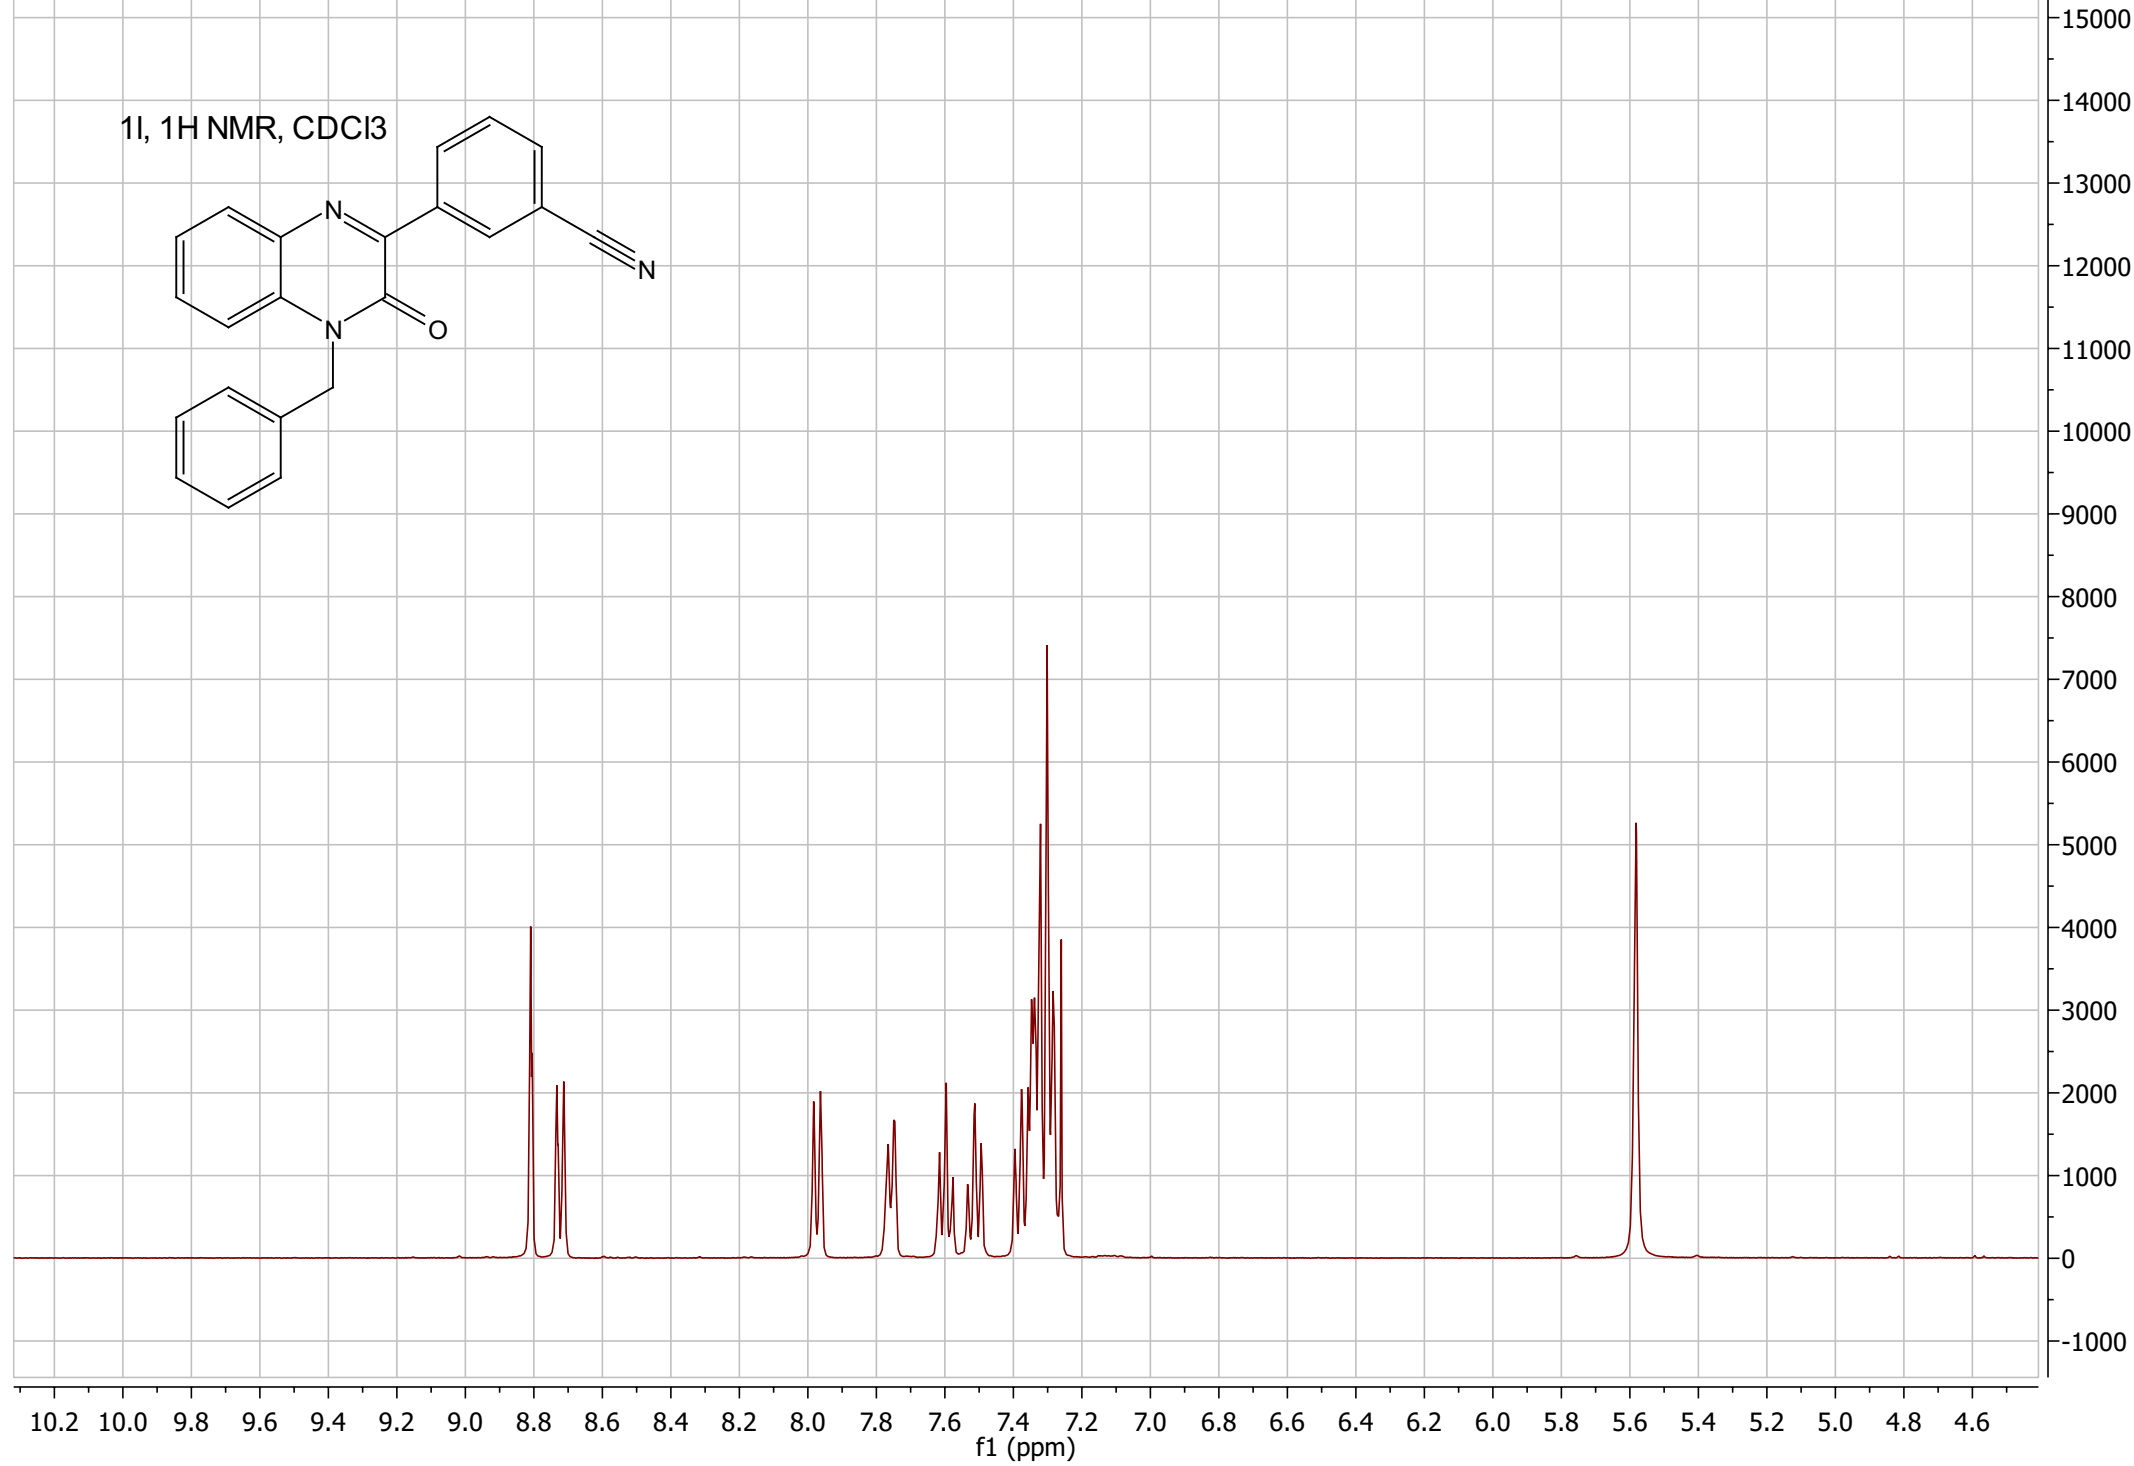



S25

1I, <sup>13</sup>C NMR, CDCl<sub>3</sub>

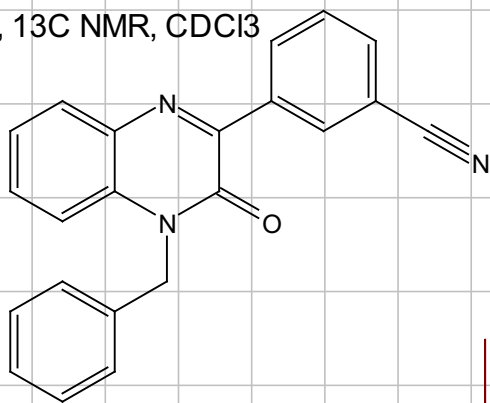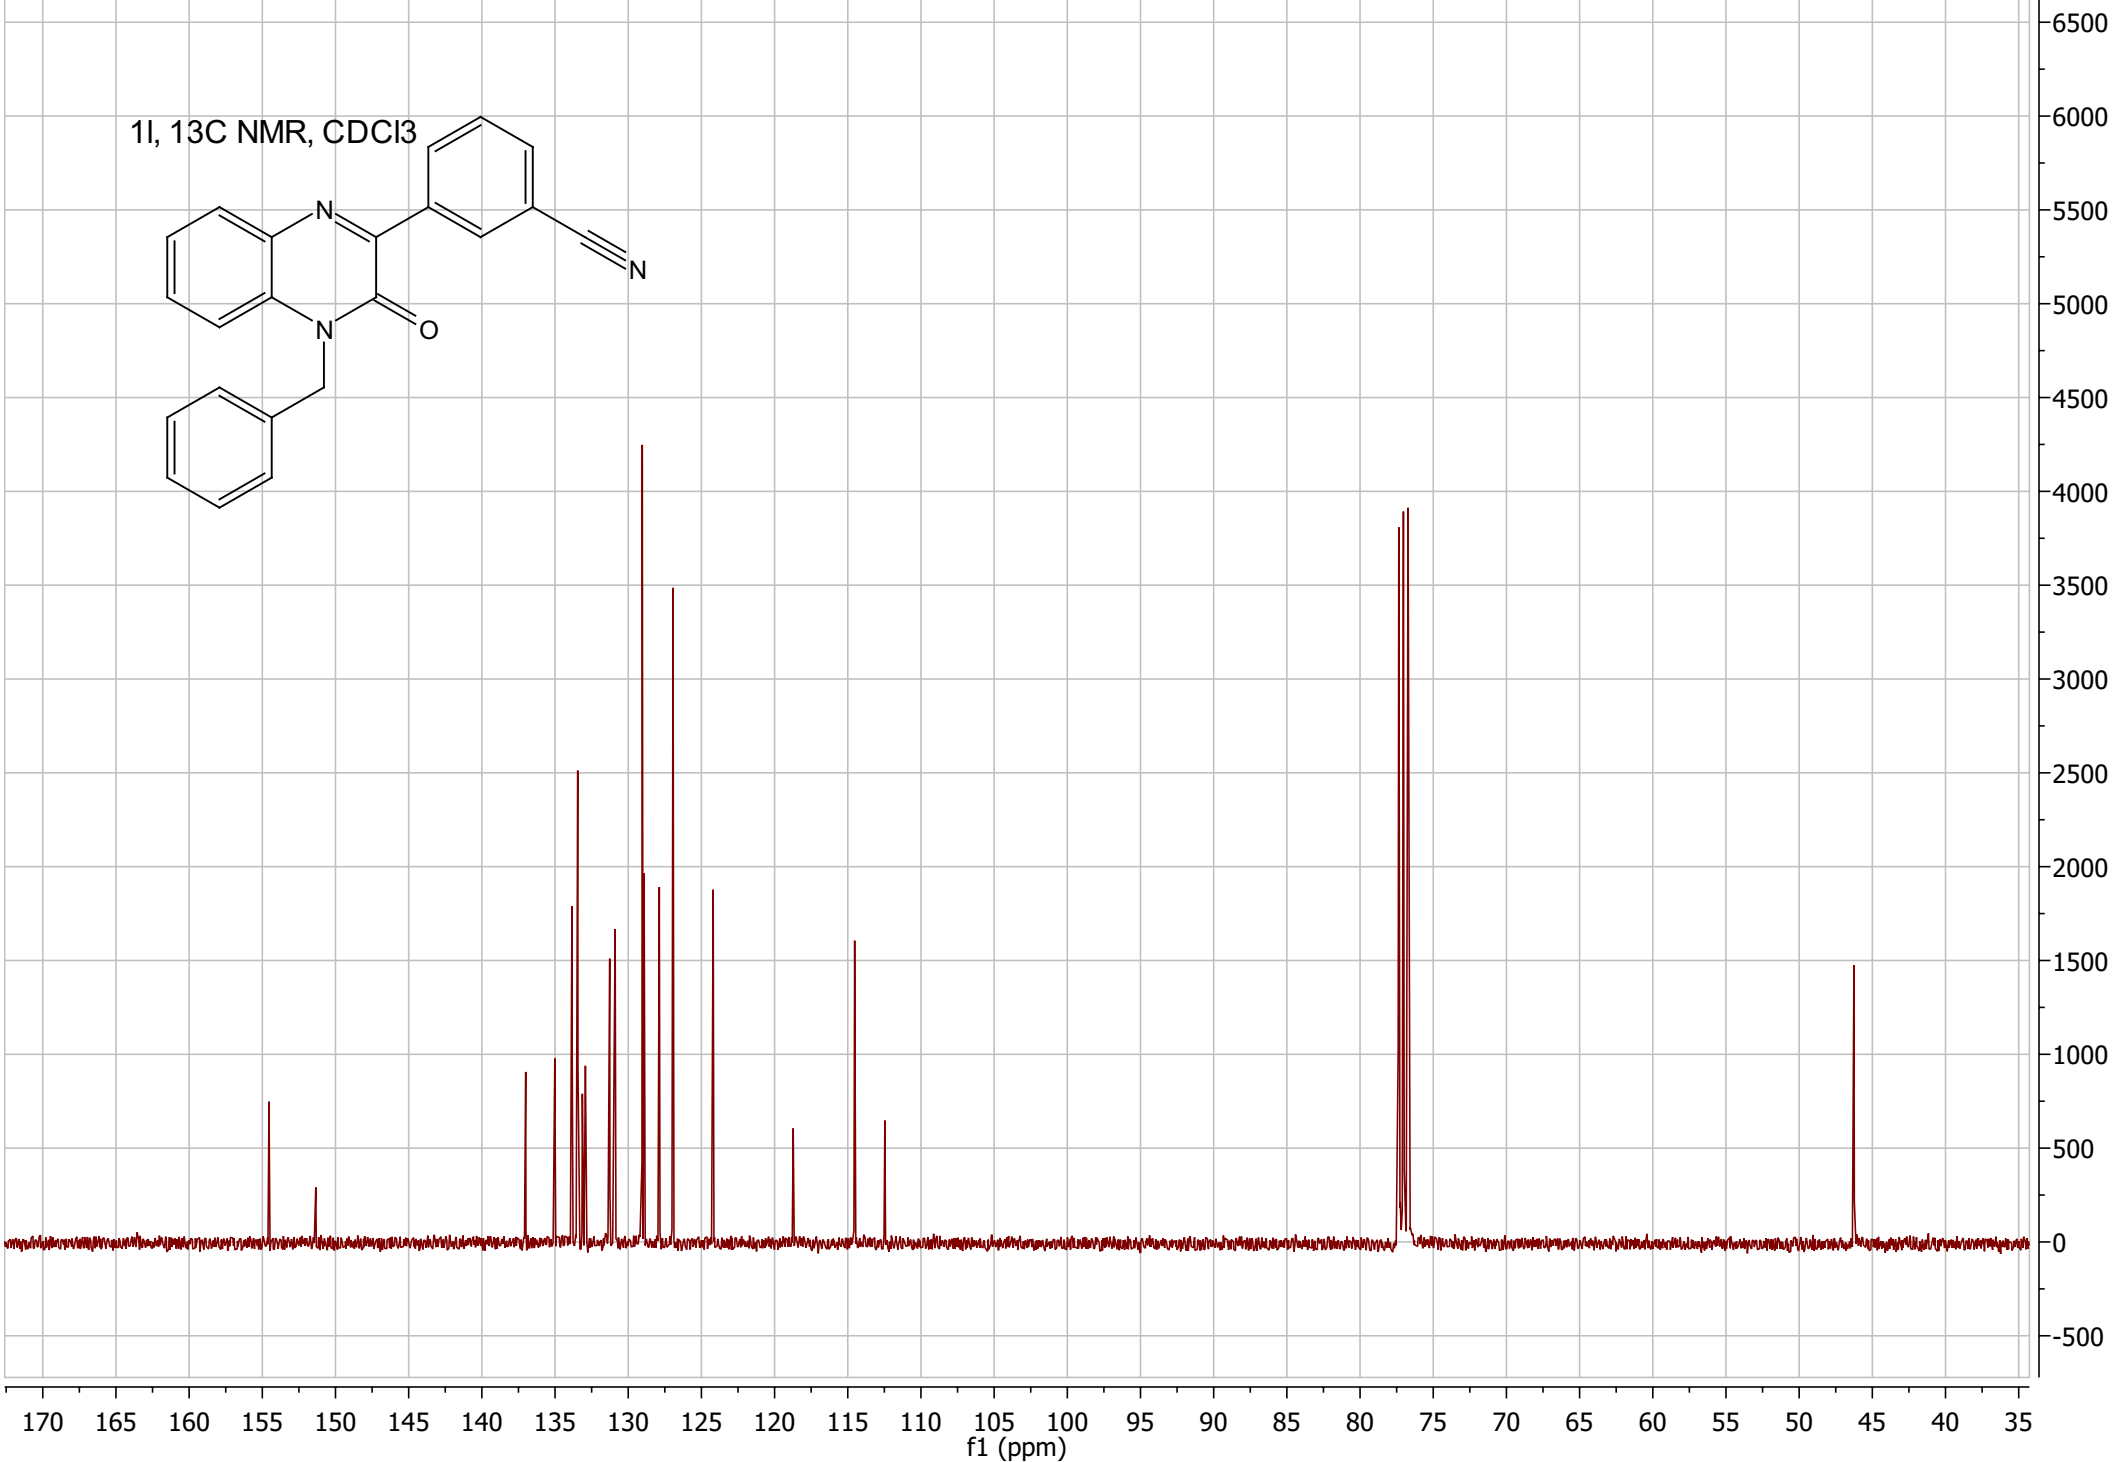

S26

1m,  $^1\text{H}$  NMR,  $\text{CDCl}_3$

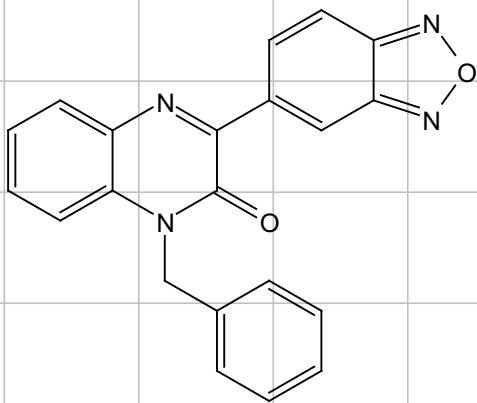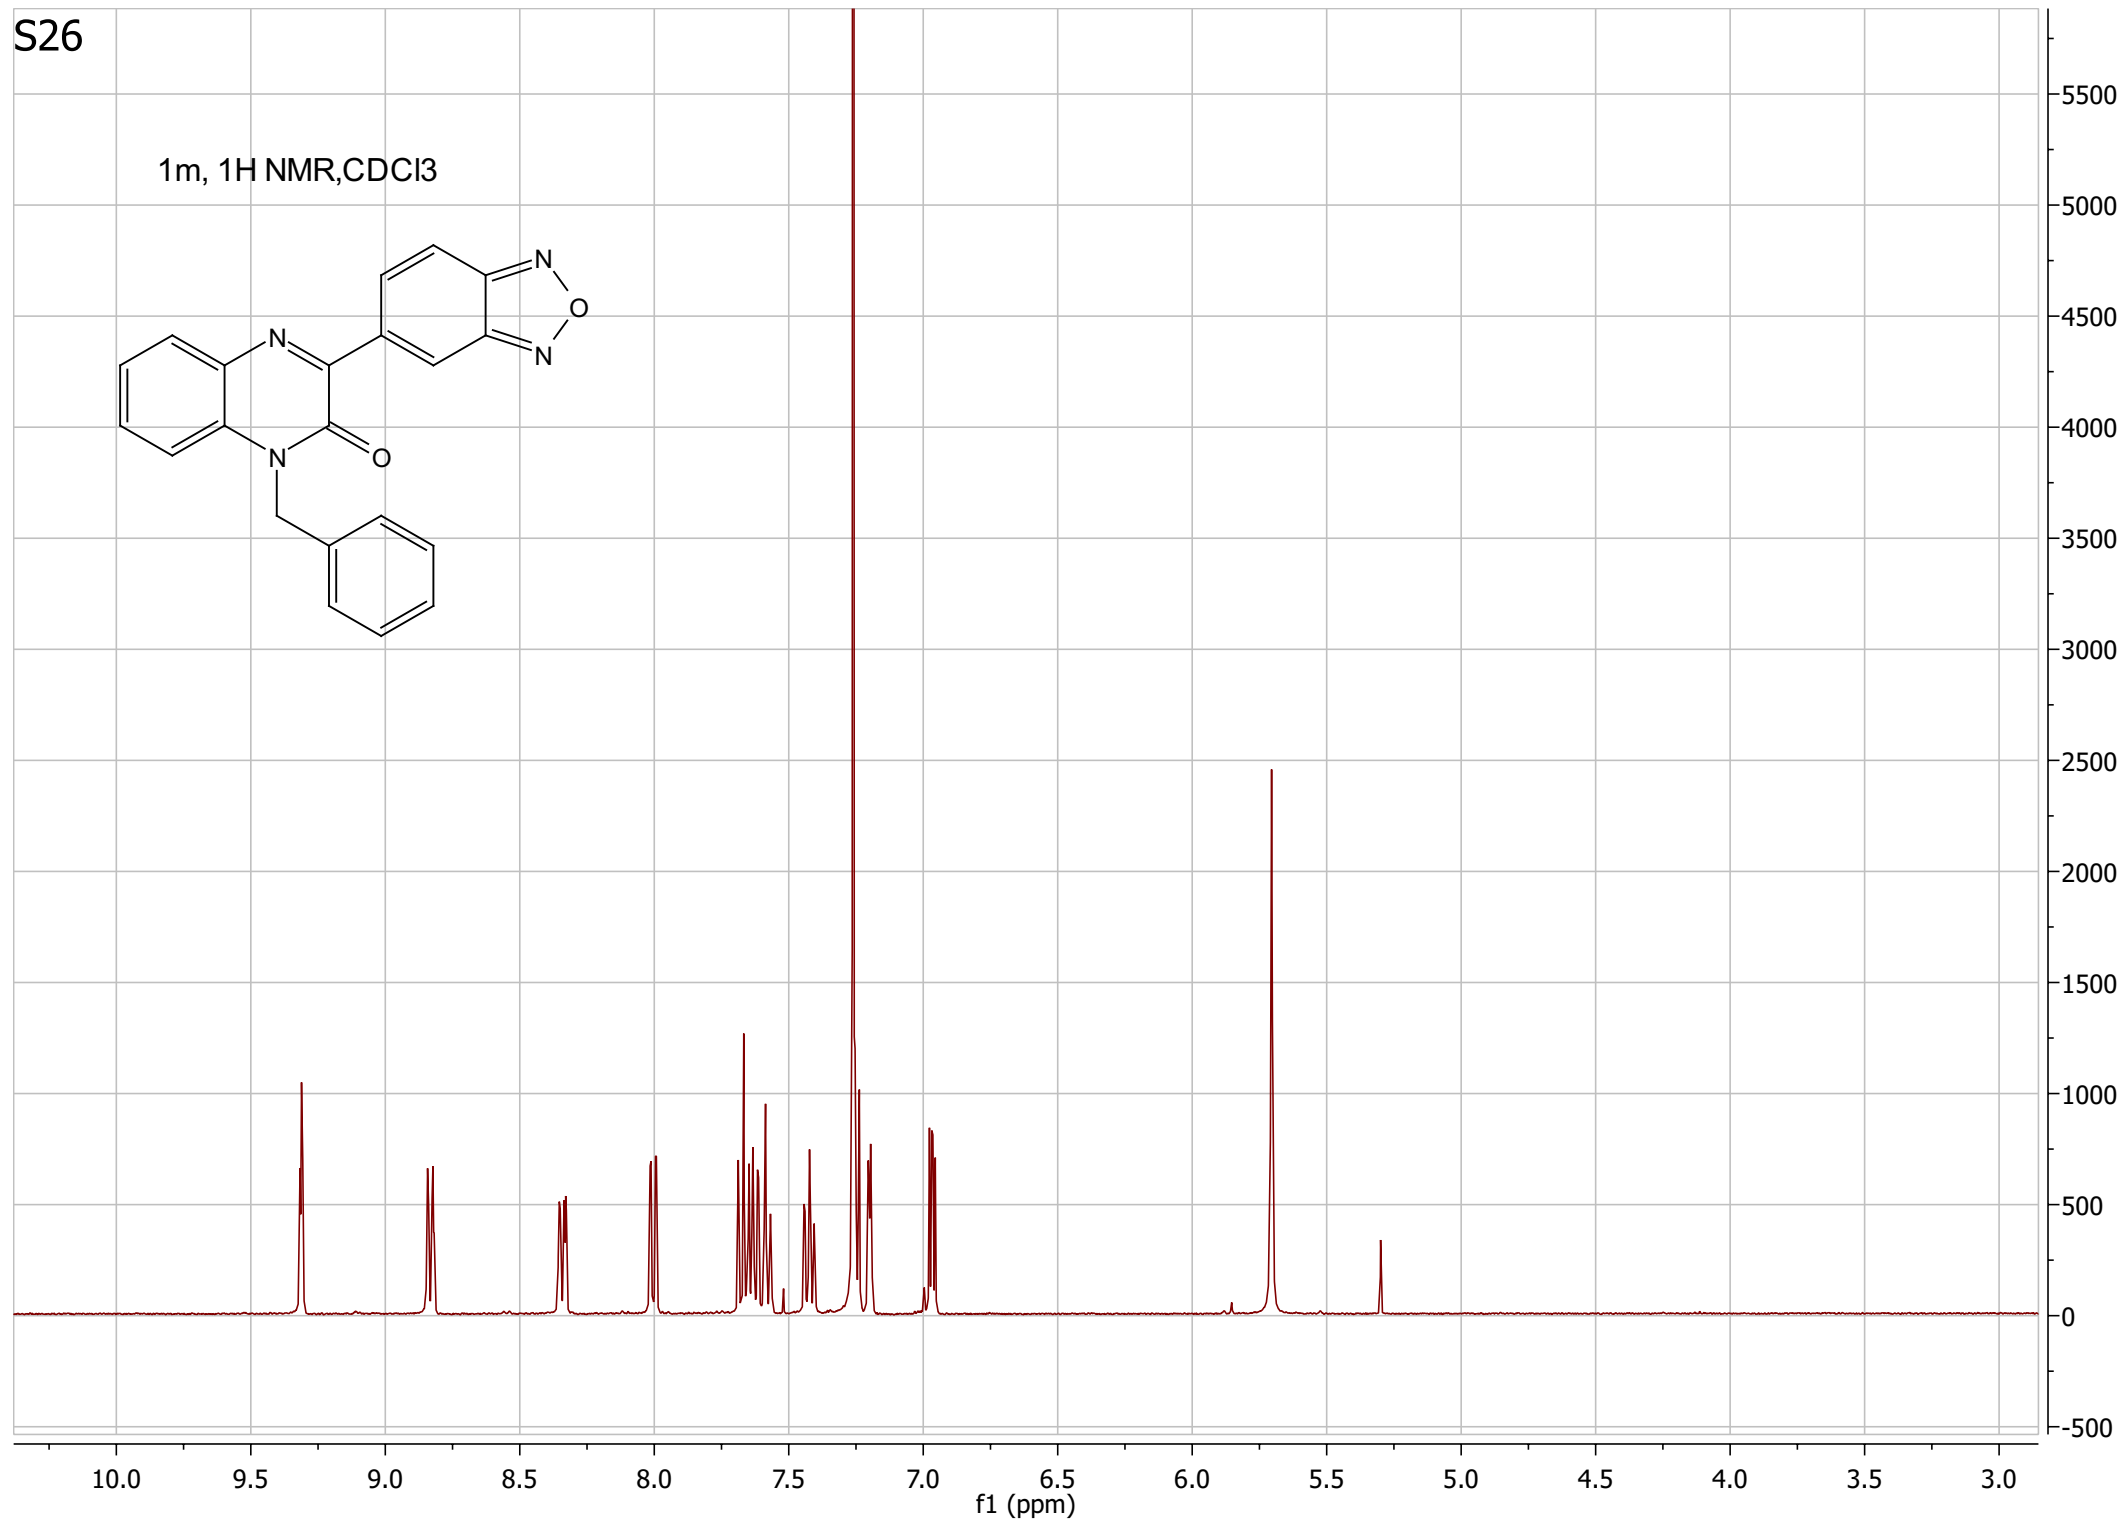

S27

1m, <sup>13</sup>C NMR, CDCl<sub>3</sub>

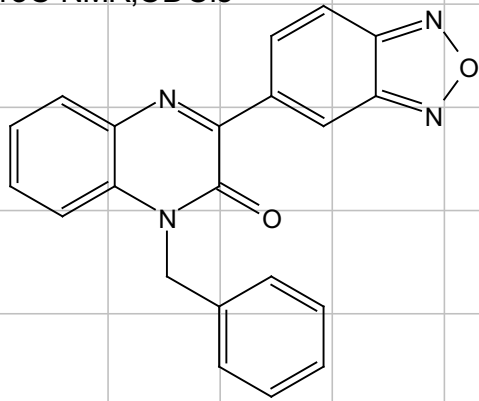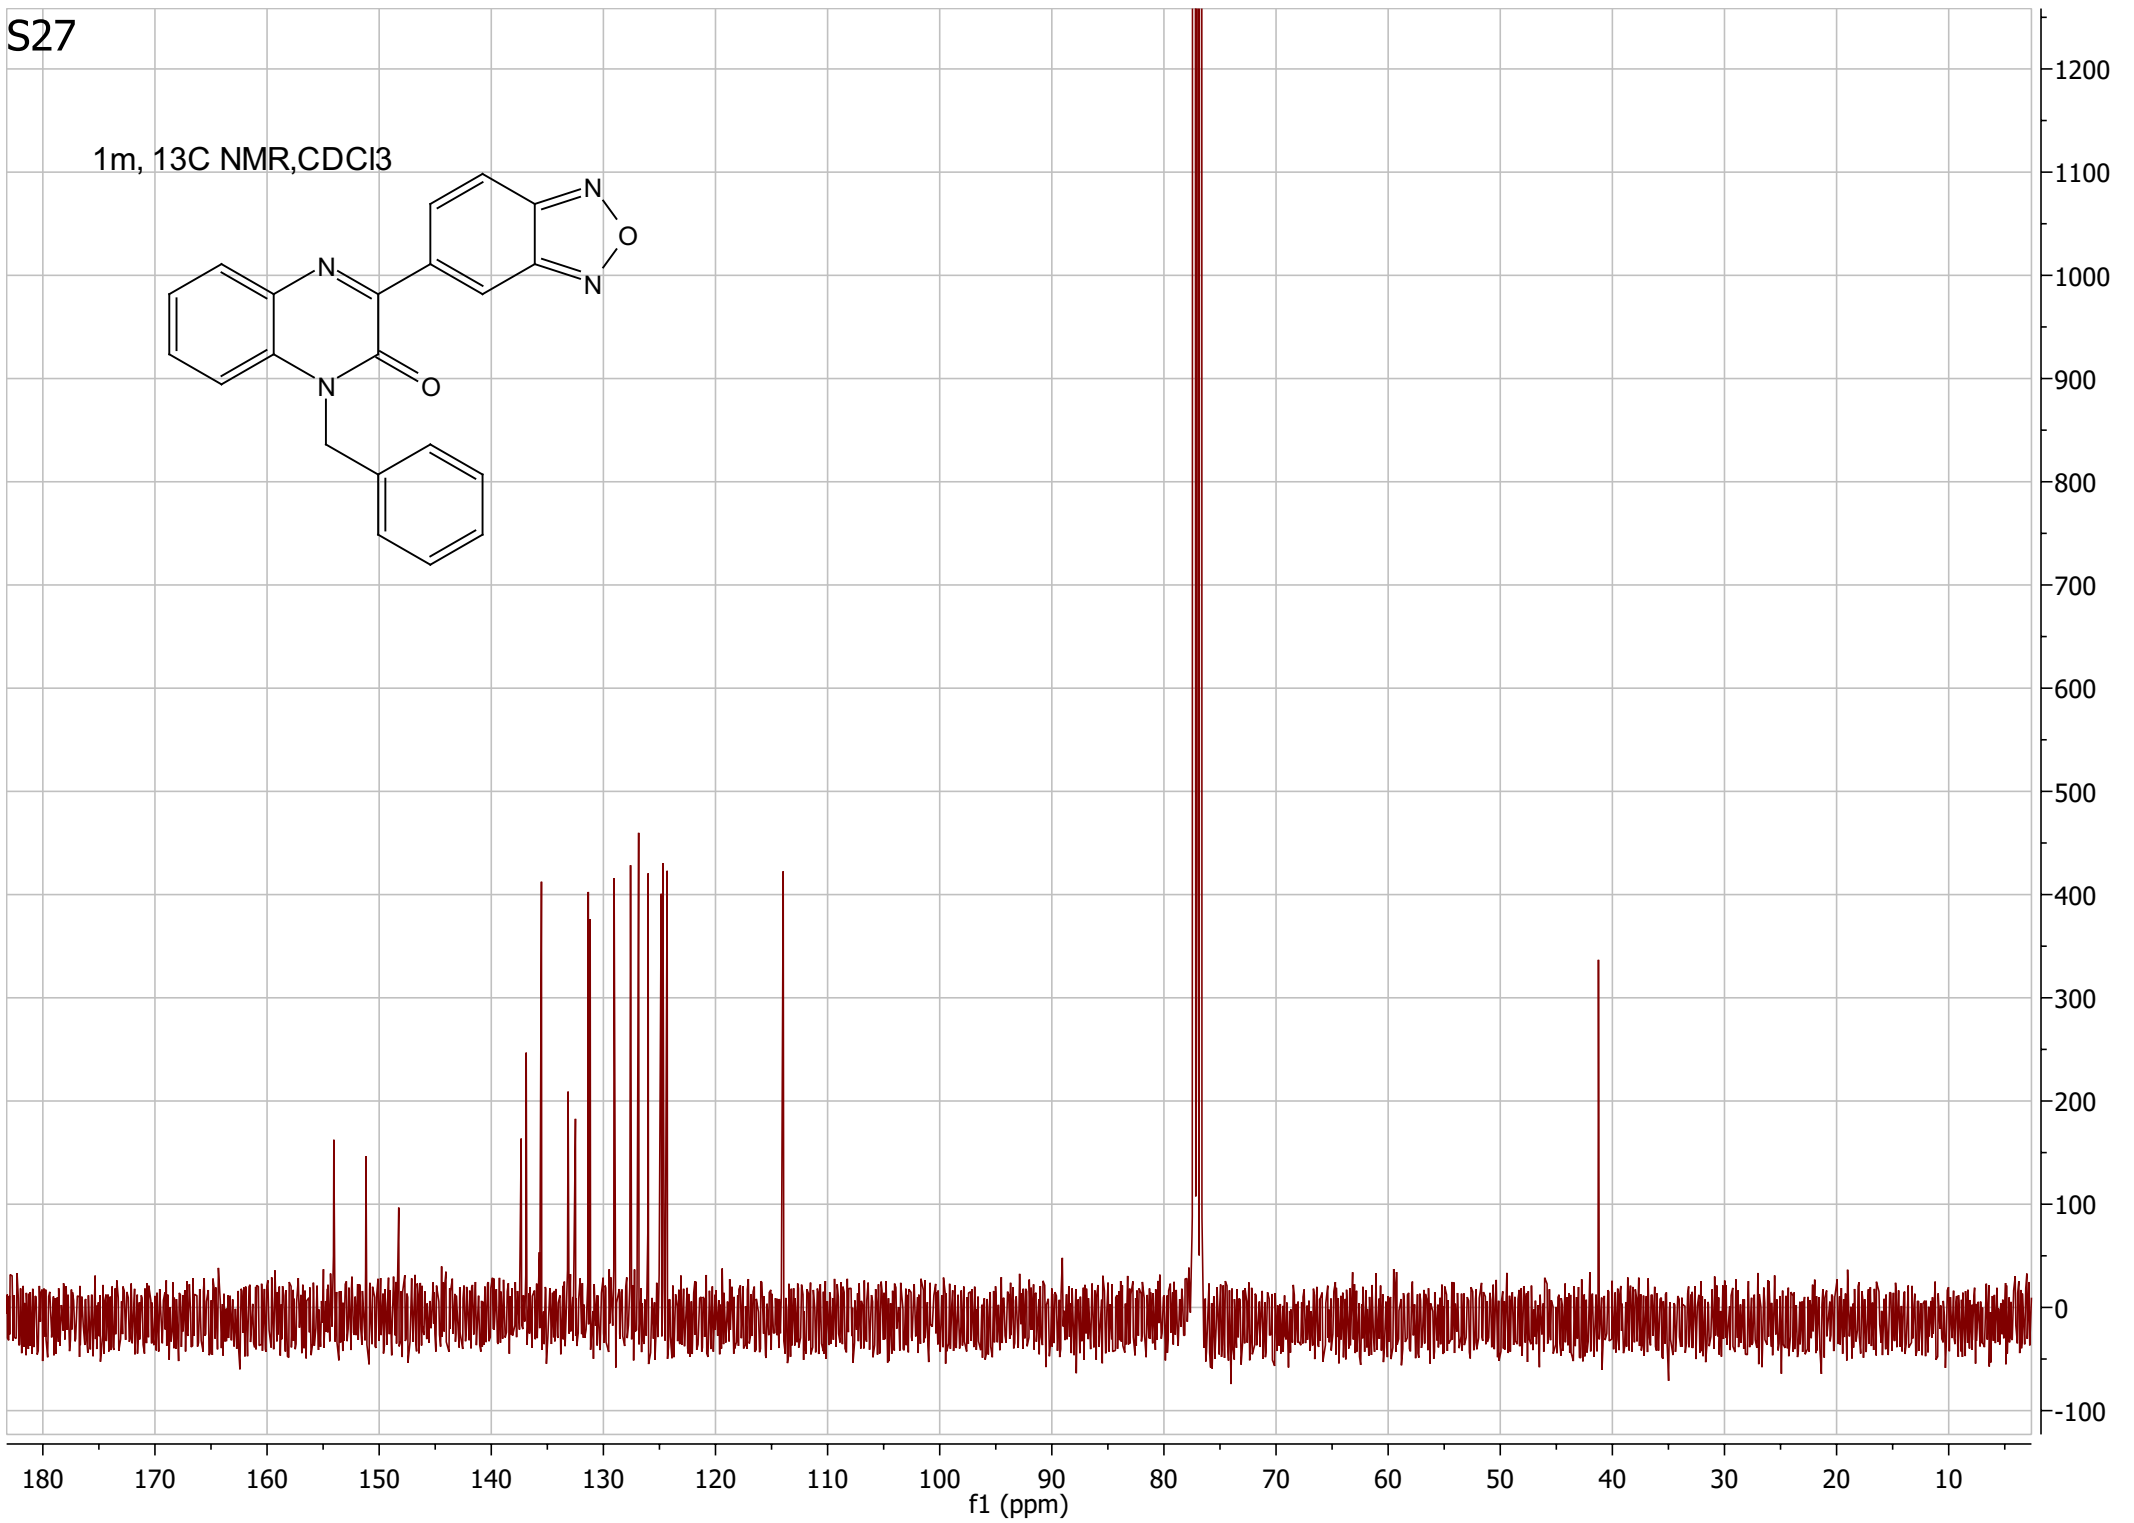

S28

2a, <sup>1</sup>H NMR, CDCl<sub>3</sub>

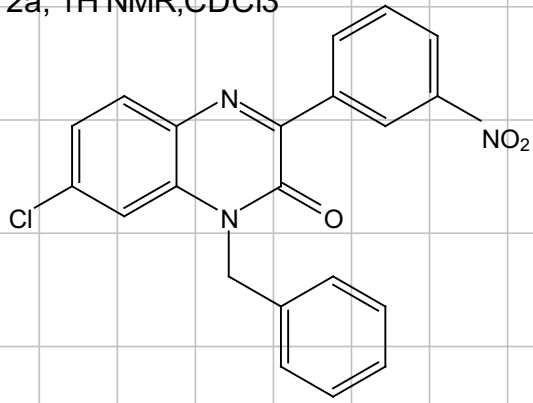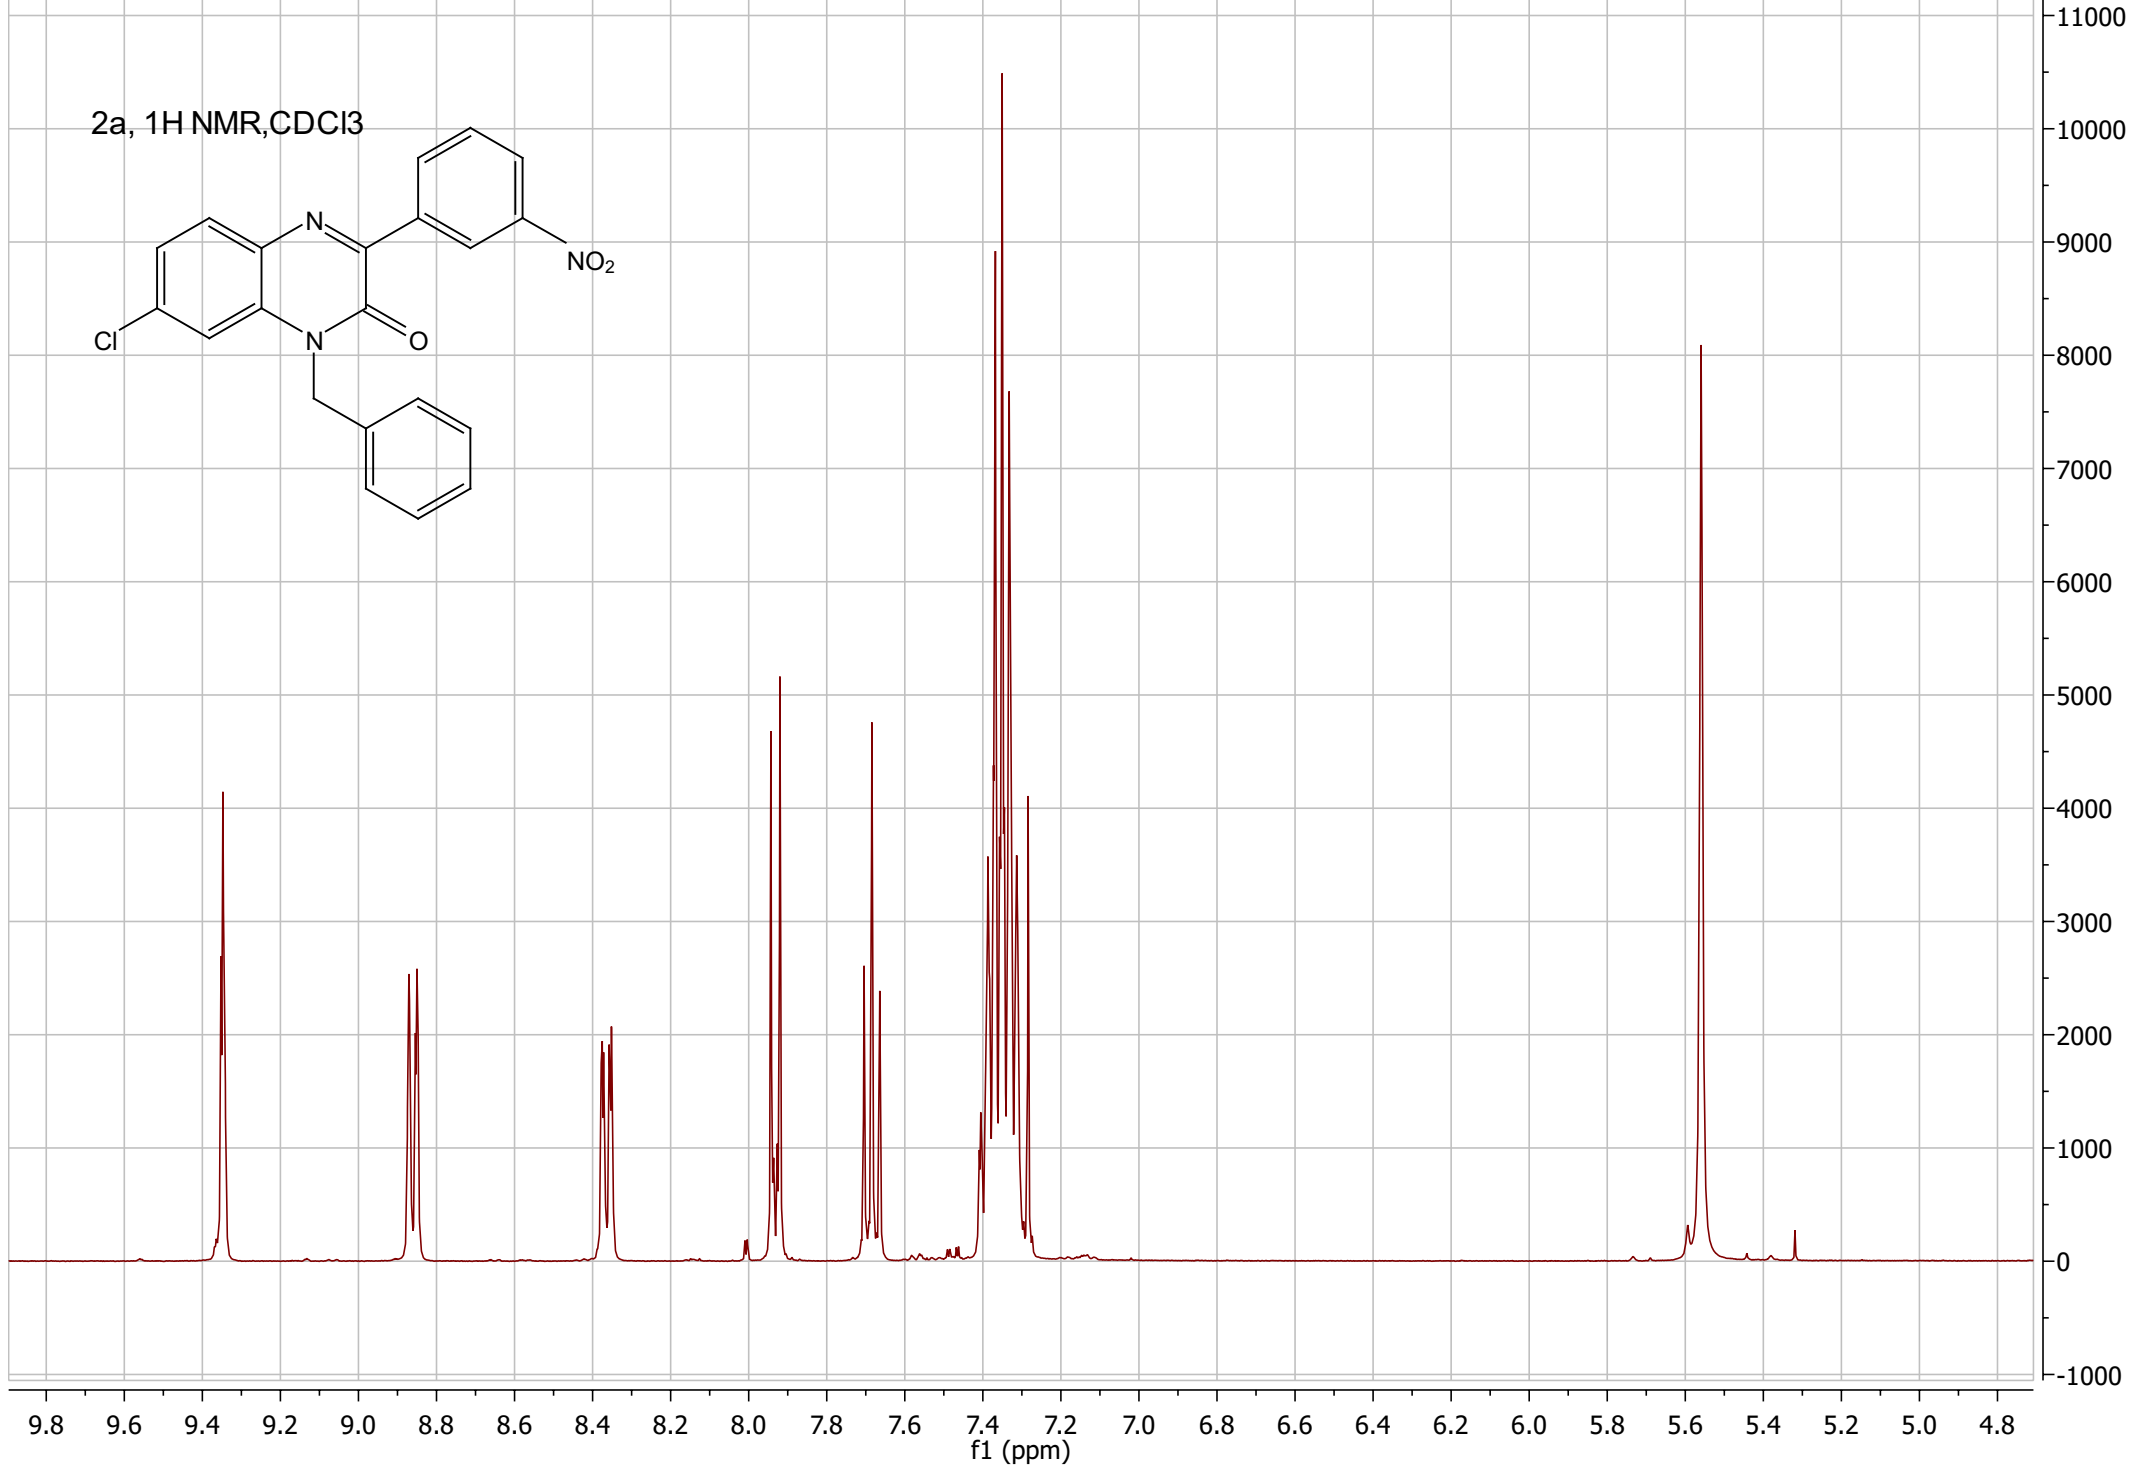

S29

2a, <sup>13</sup>C NMR, CDCl<sub>3</sub>

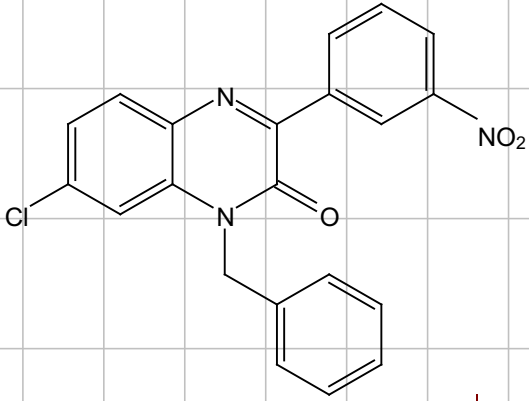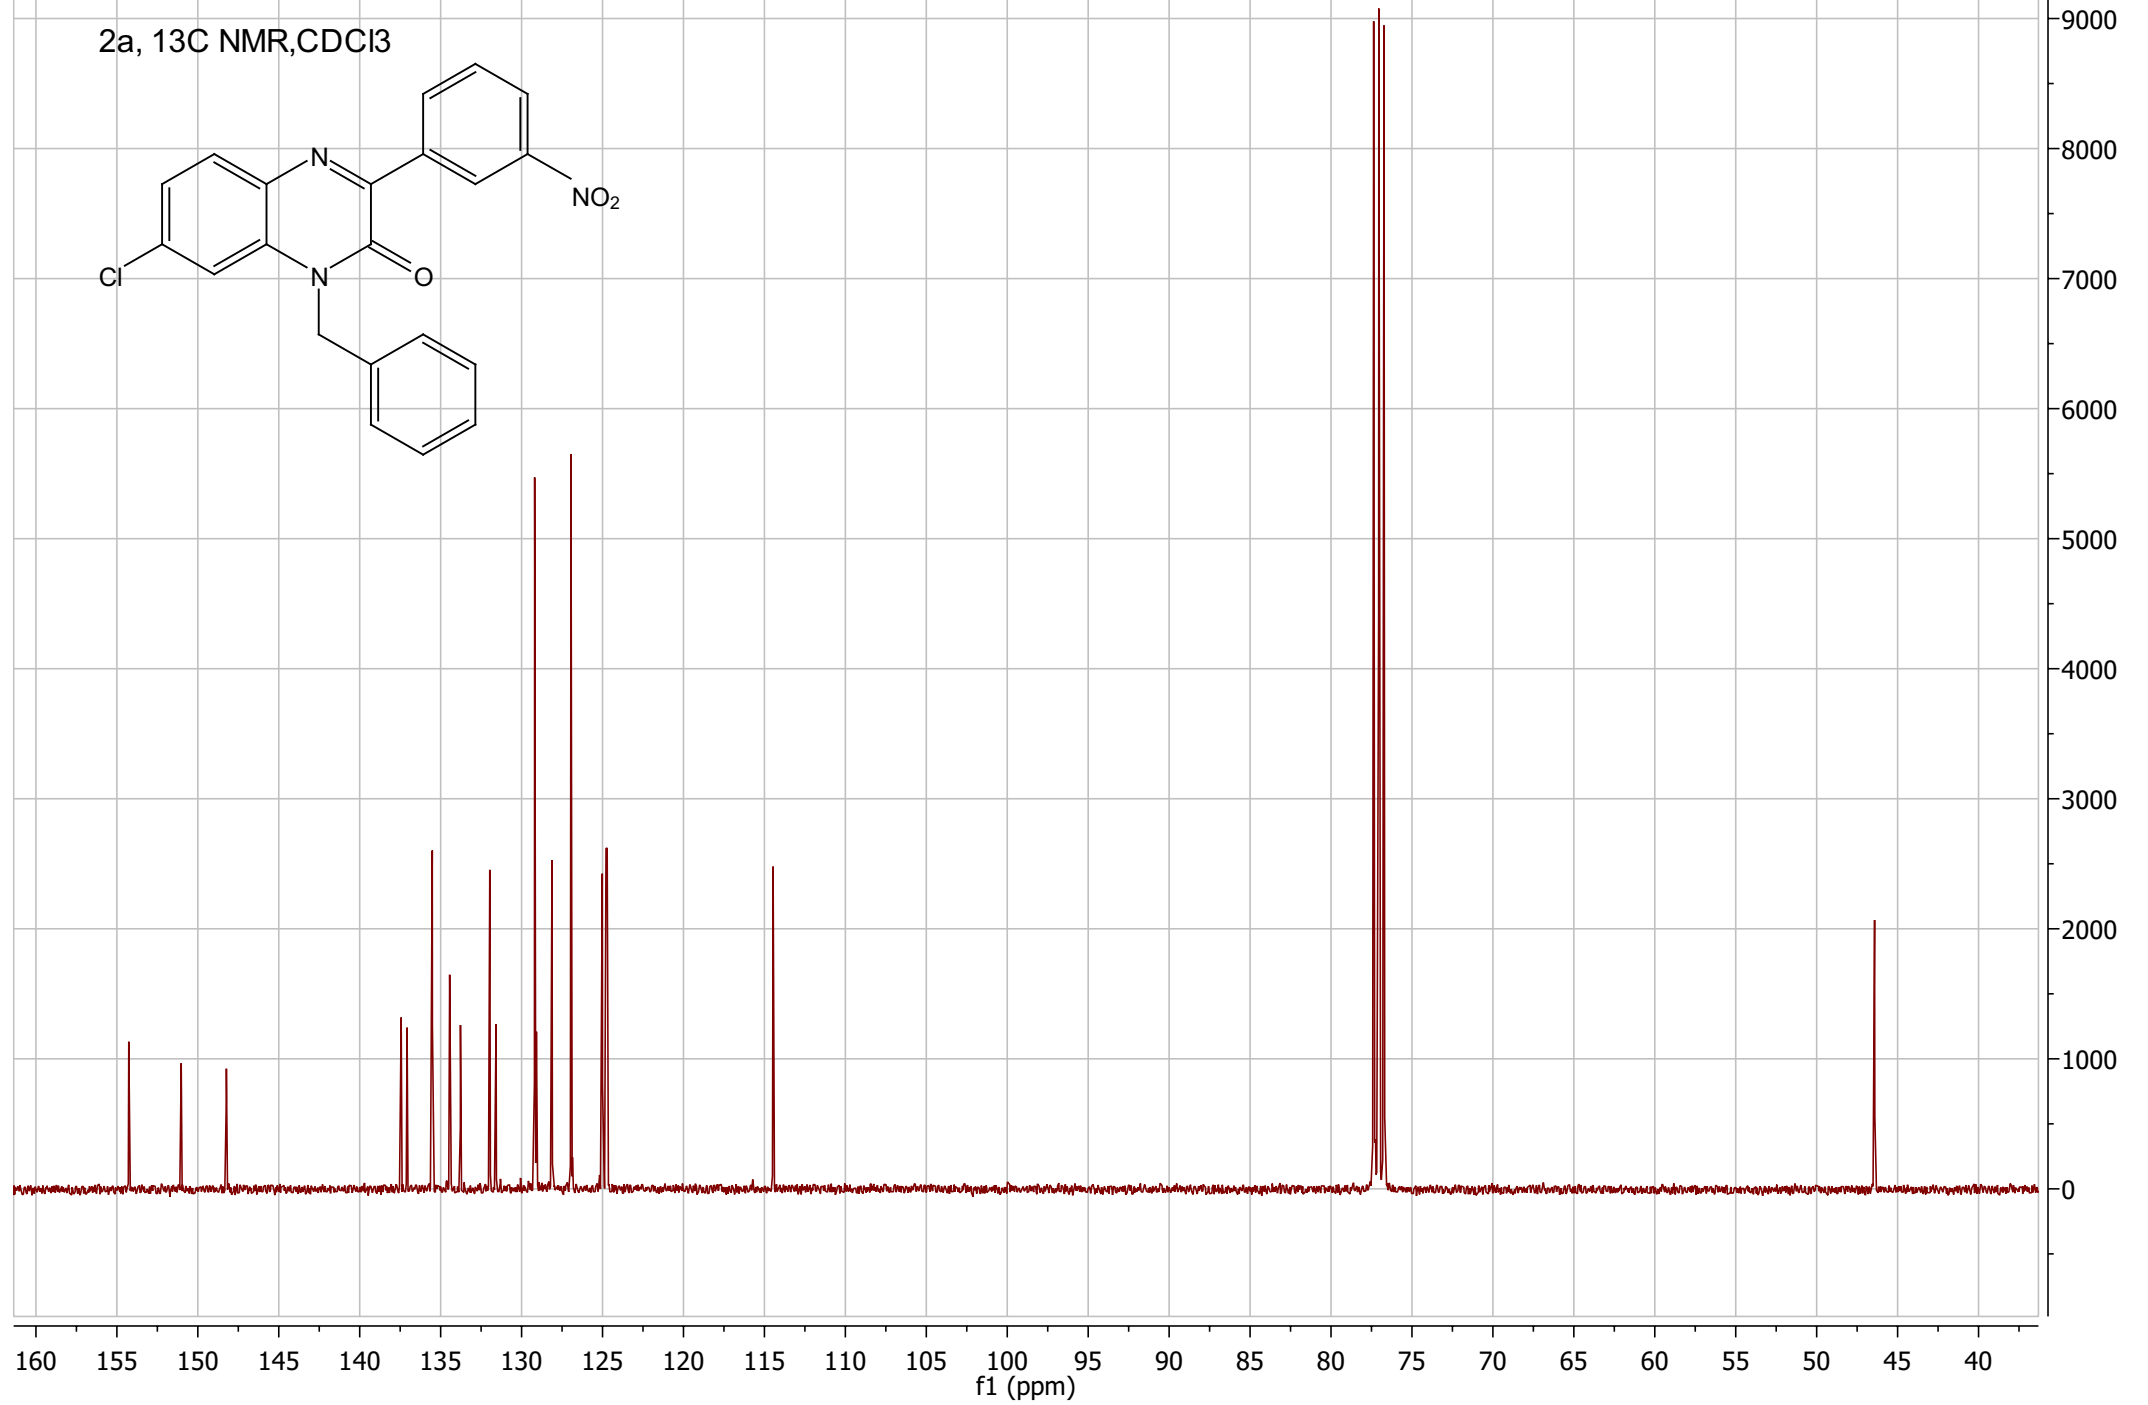

S30

2b, <sup>1</sup>H NMR, CDCl<sub>3</sub>

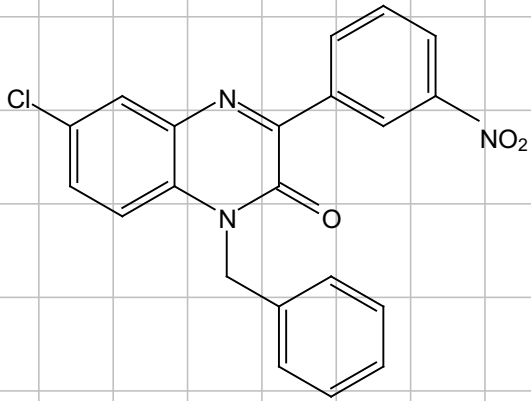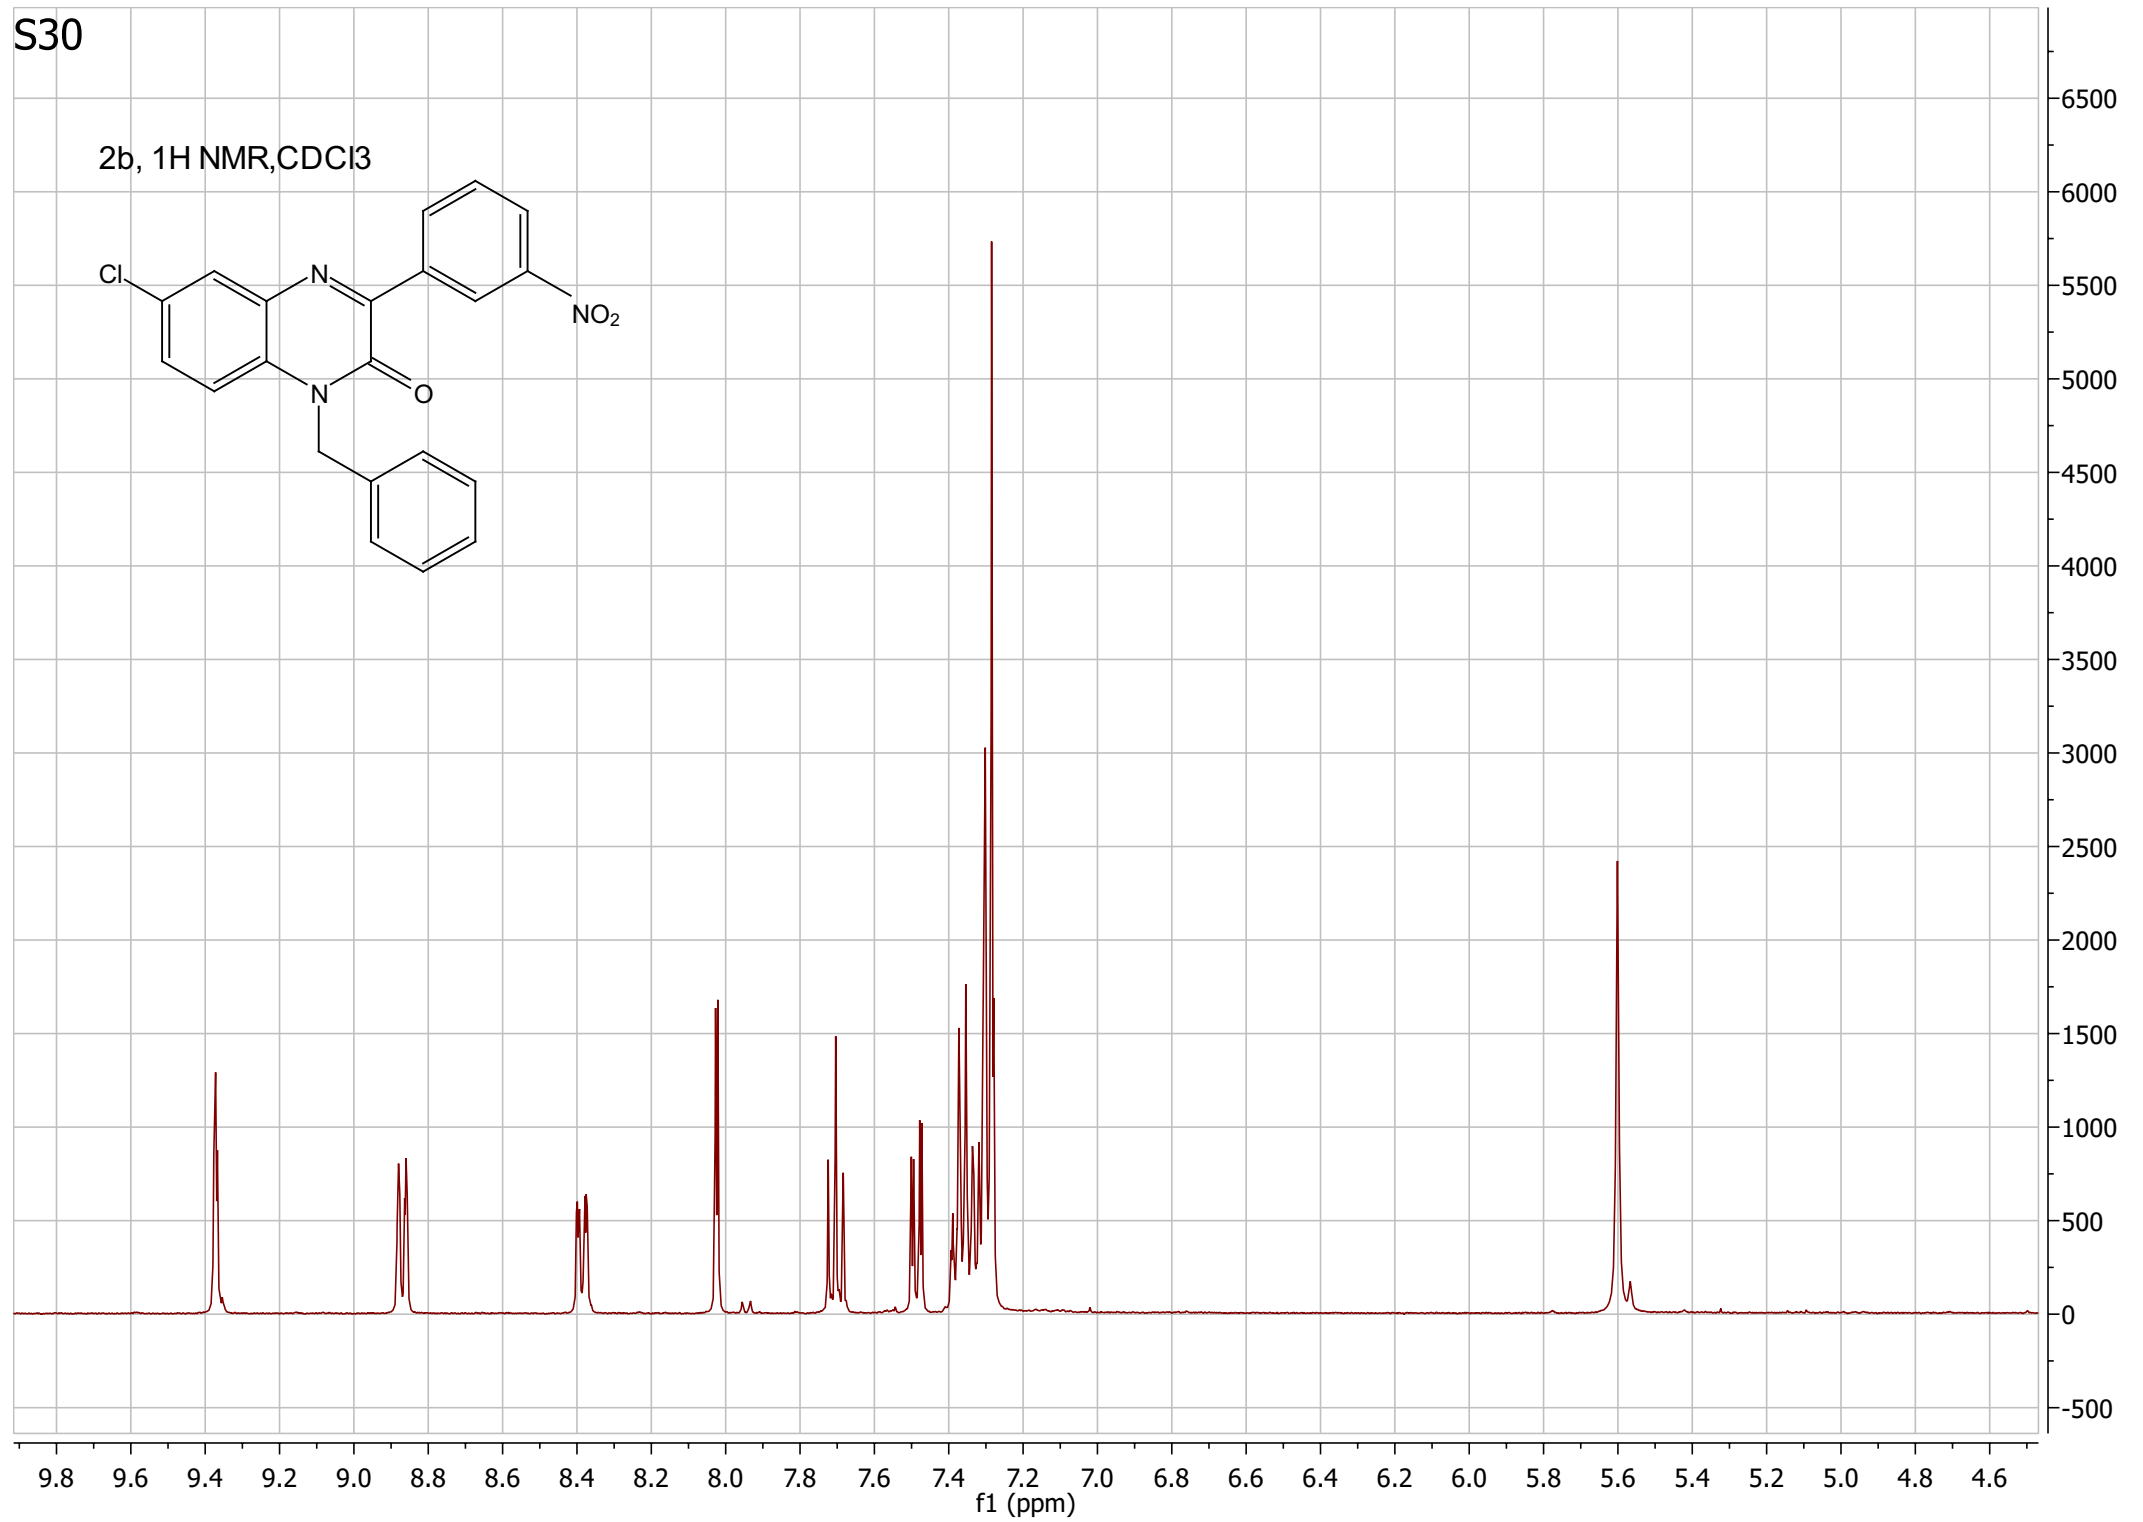

S31

2b, <sup>13</sup>C NMR, CDCl<sub>3</sub>

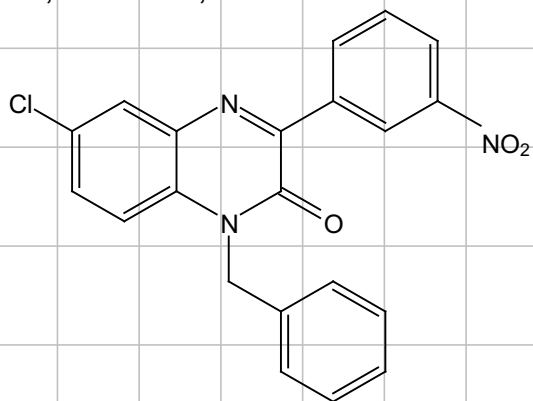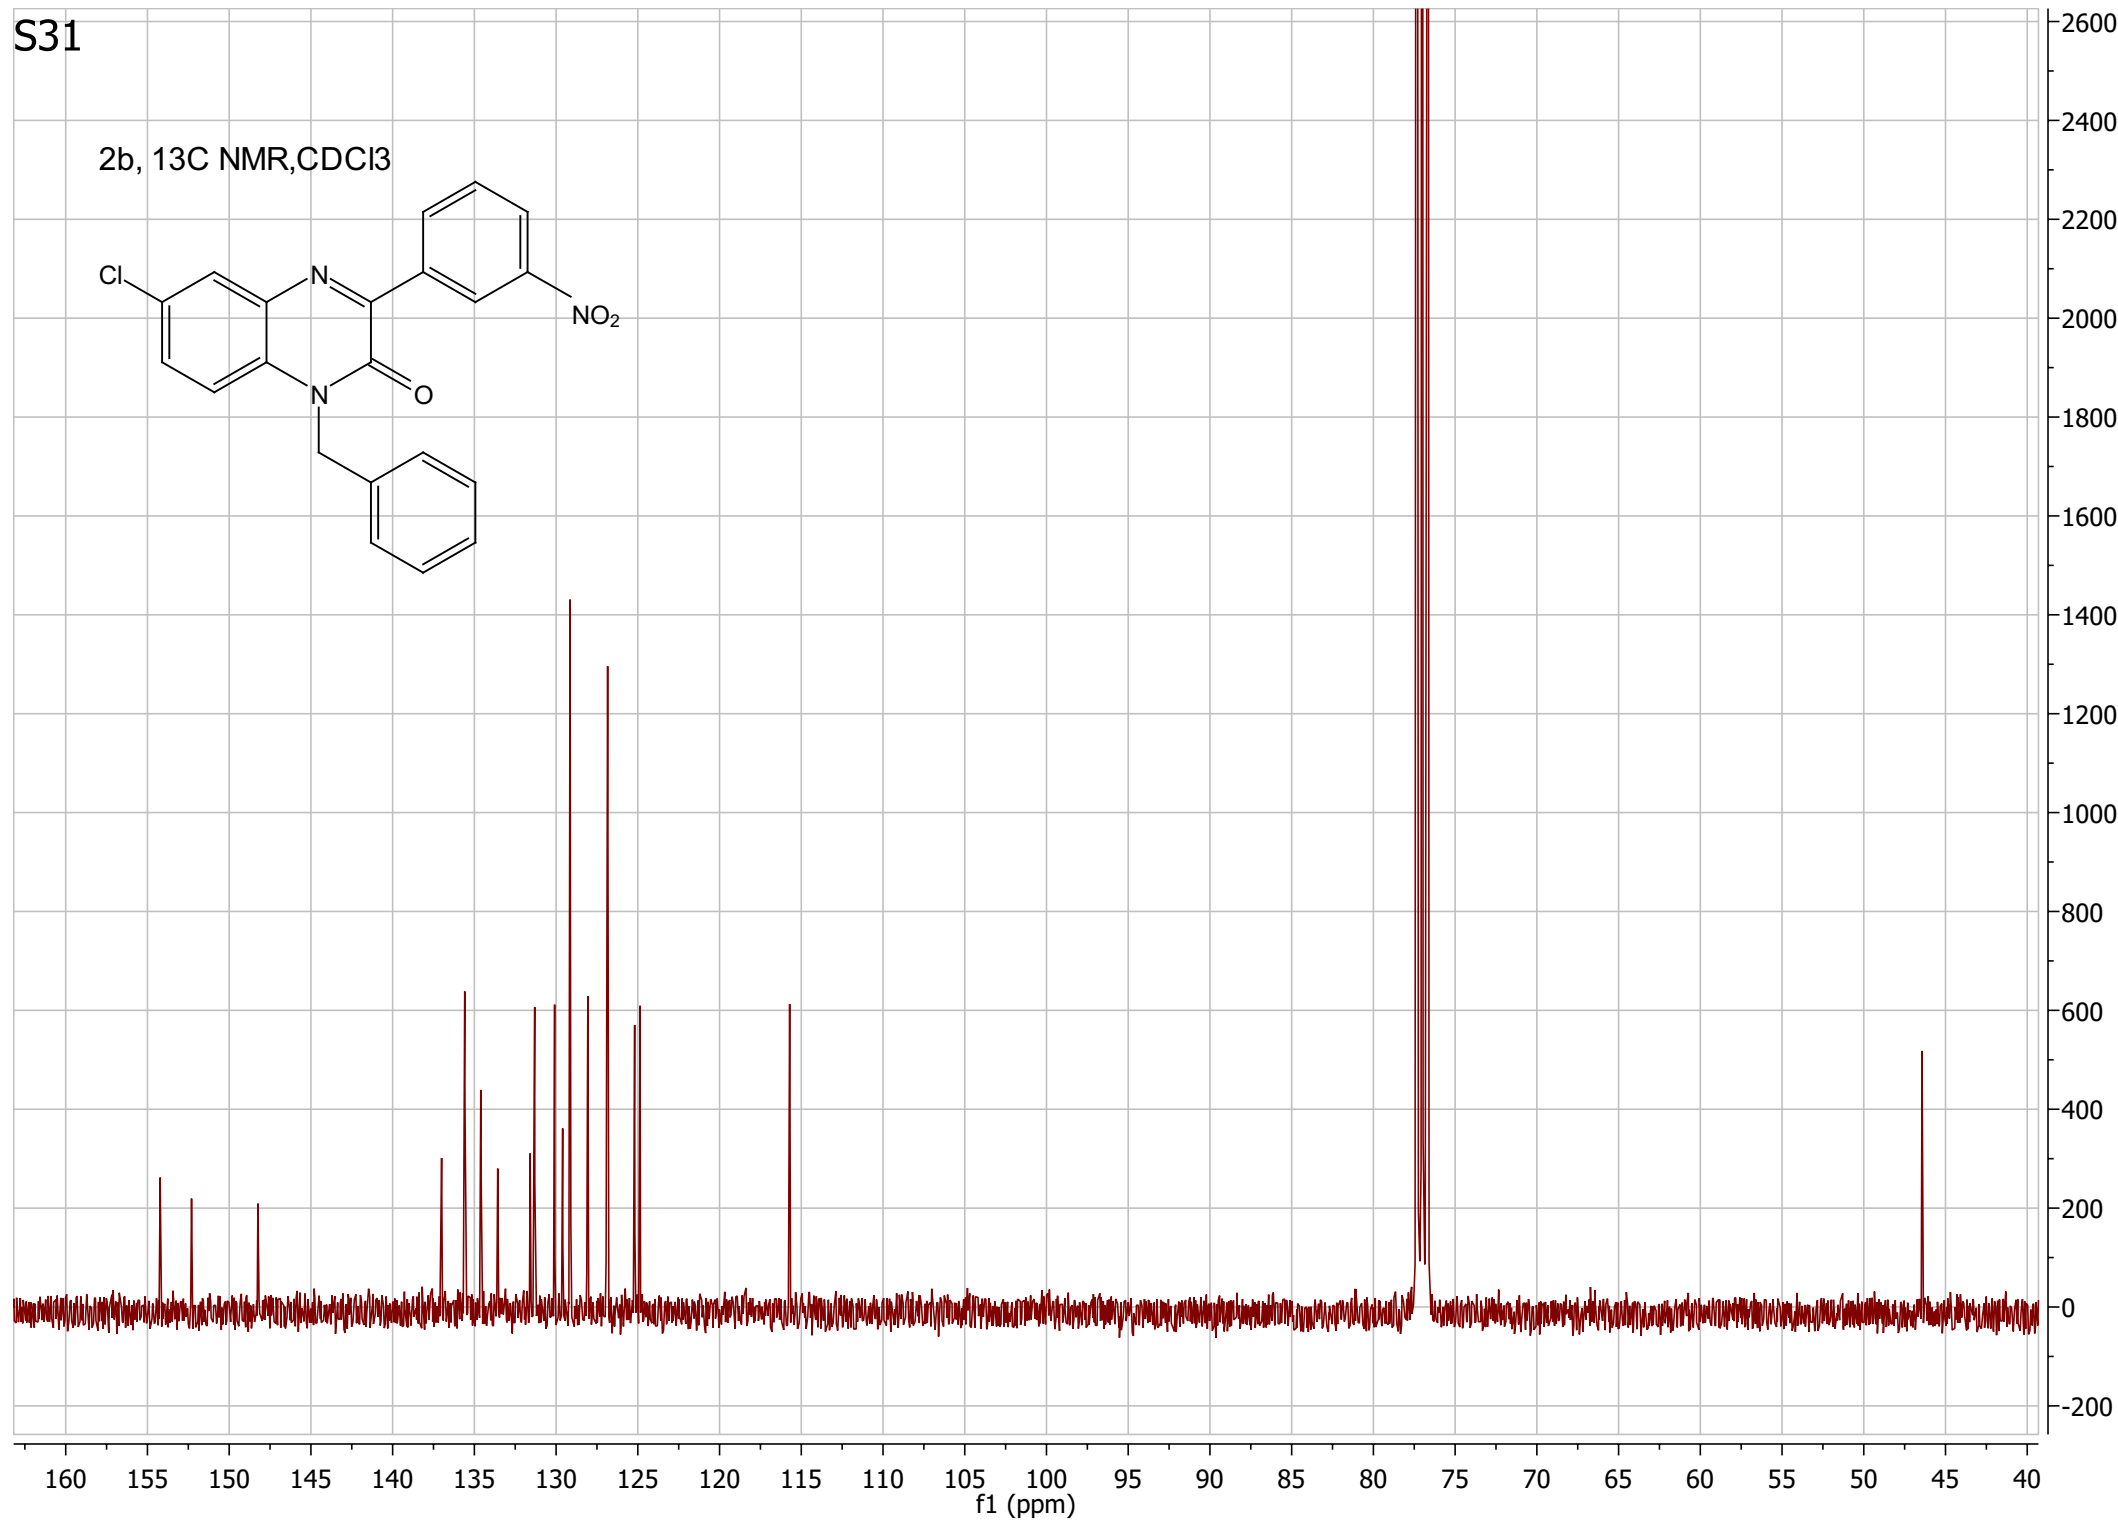

S32

2c, <sup>1</sup>H NMR, CDCl<sub>3</sub>

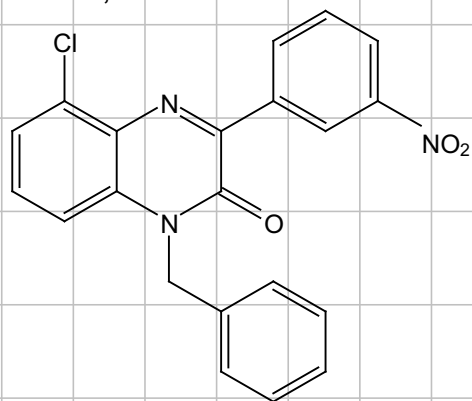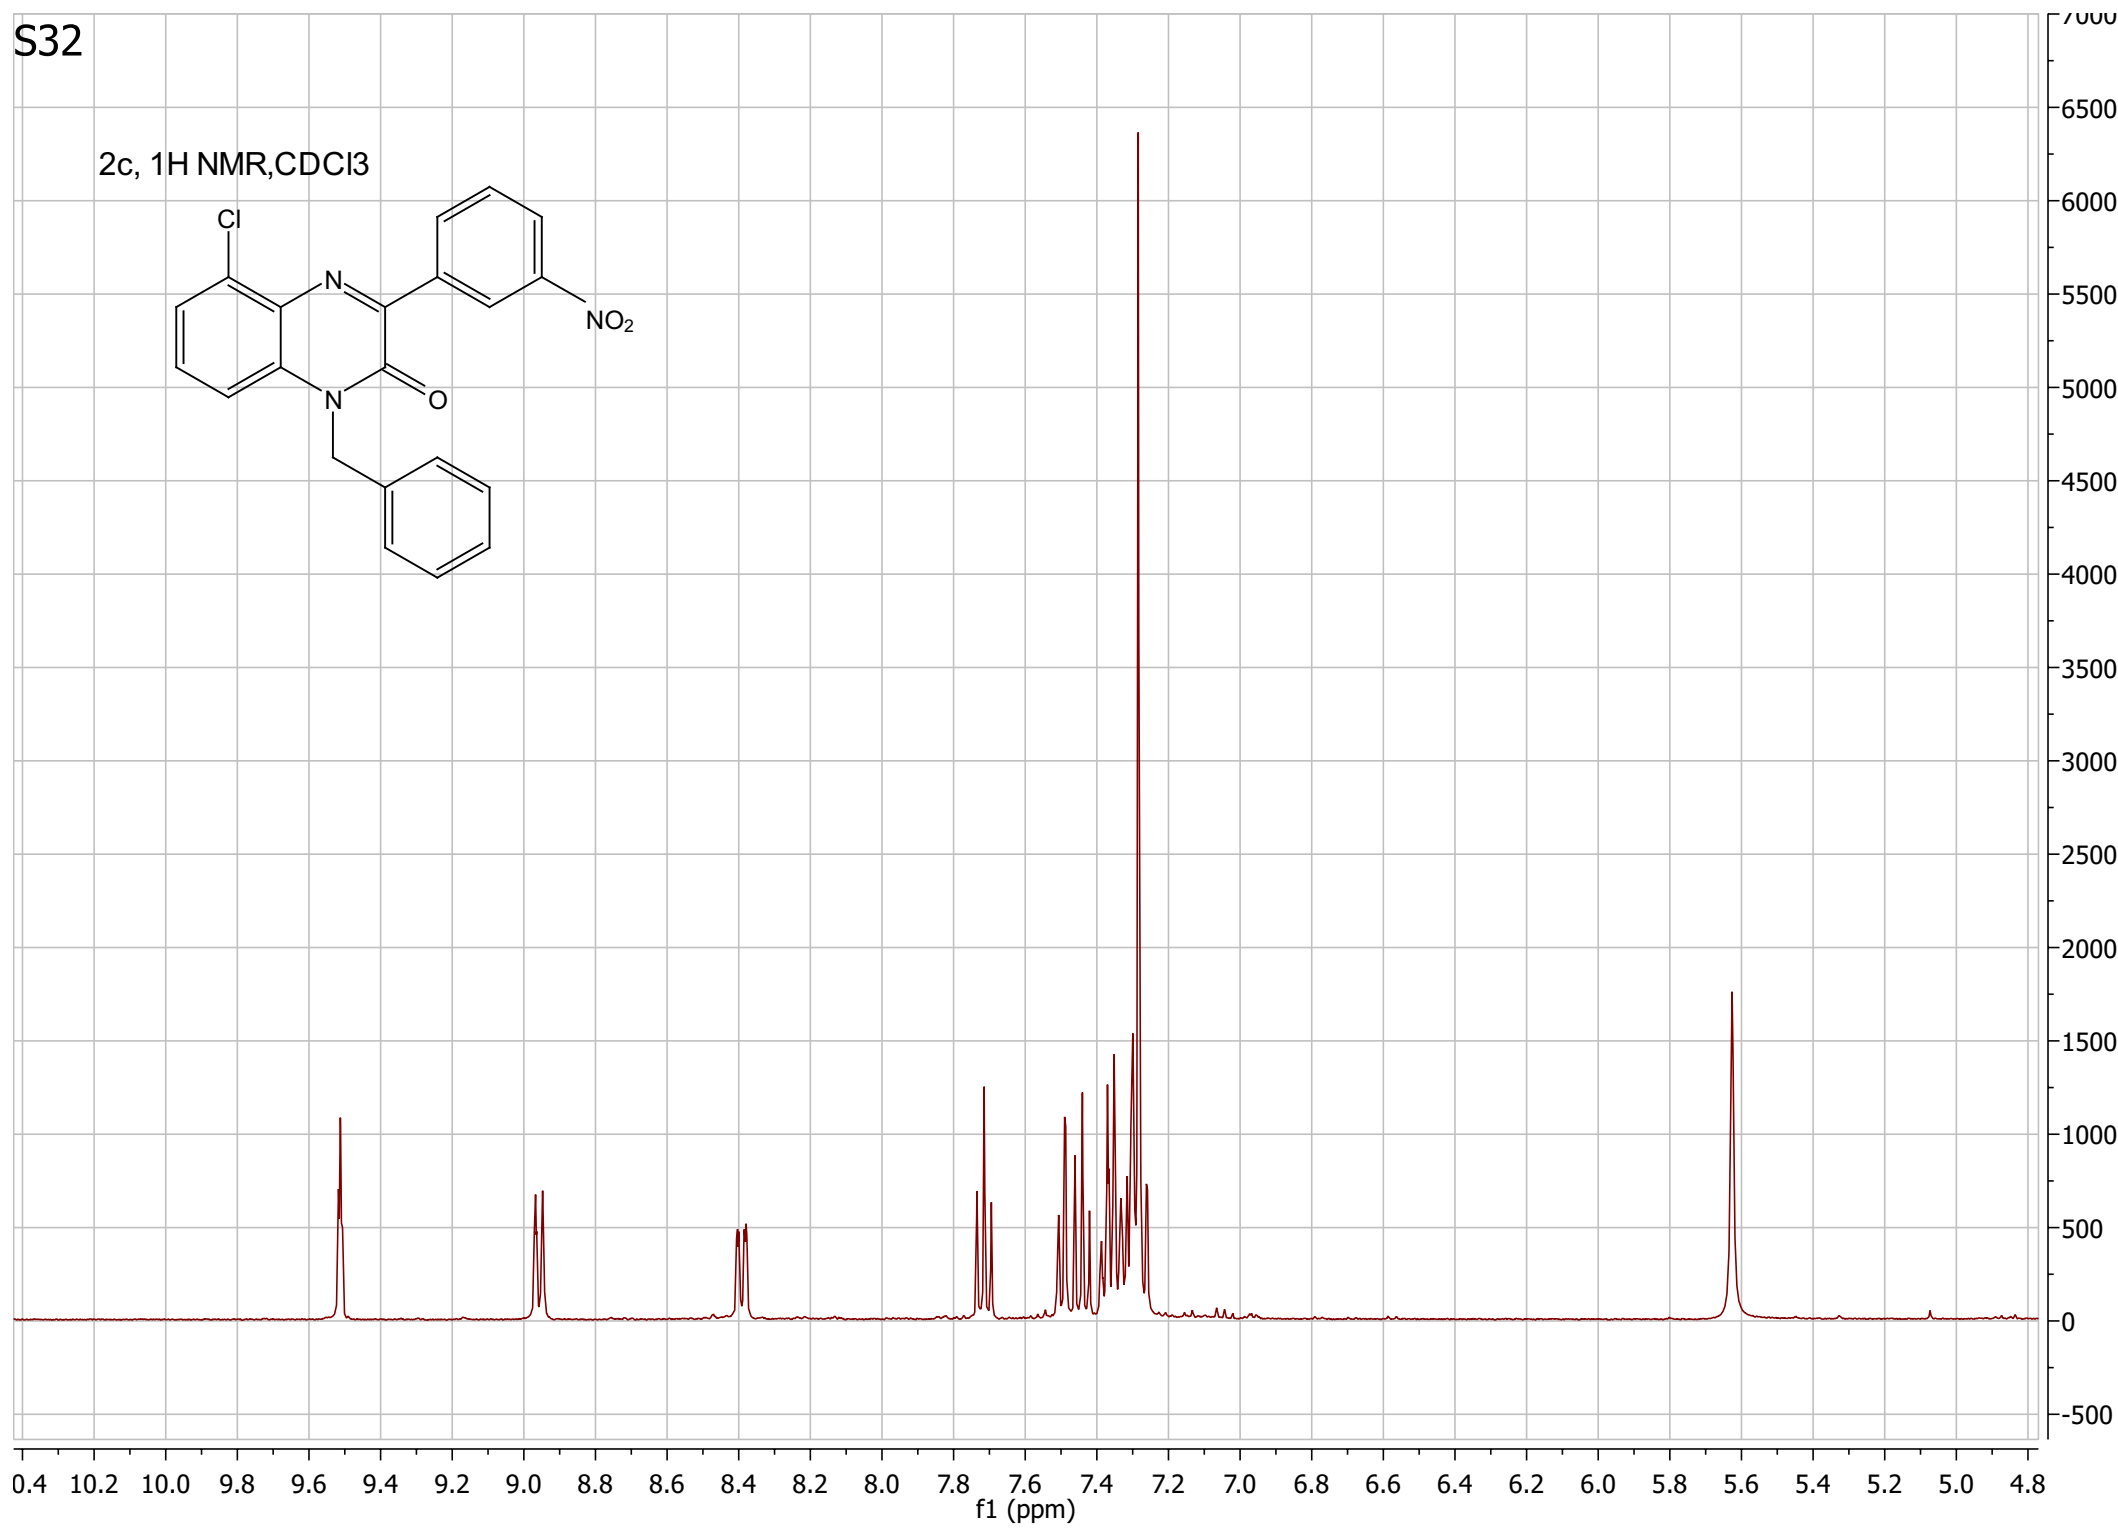



S33

2c, <sup>13</sup>C NMR, CDCl<sub>3</sub>

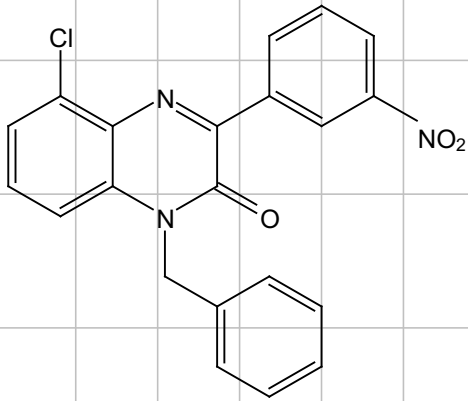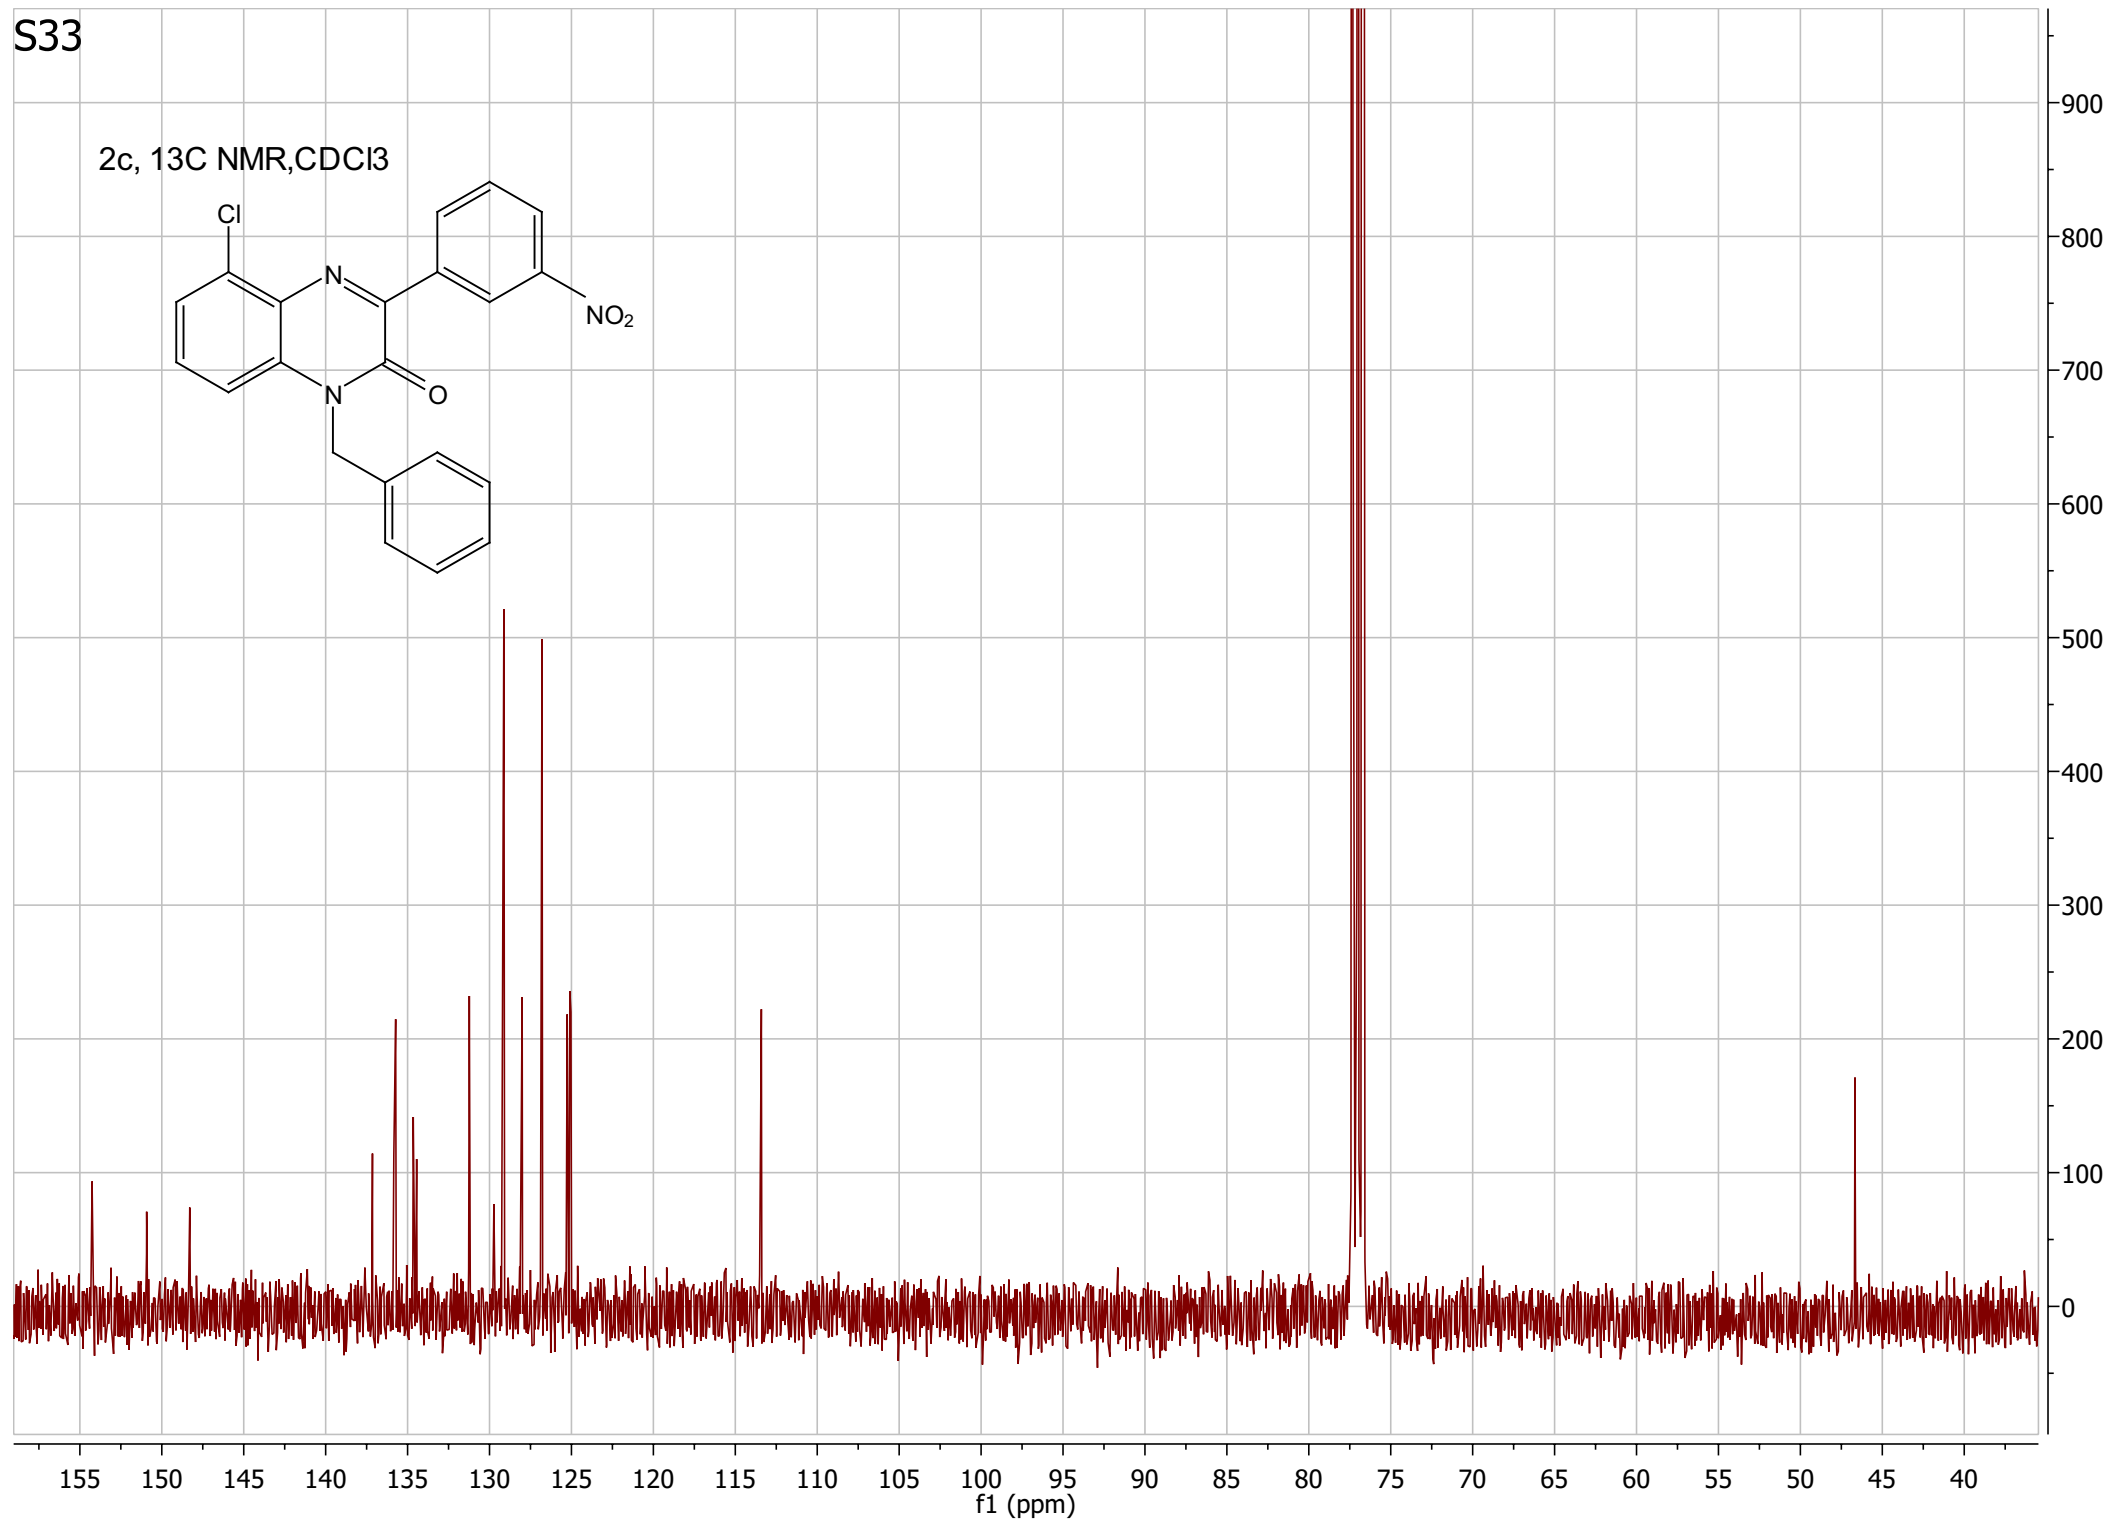

S34

2d, <sup>1</sup>H NMR, CDCl<sub>3</sub>

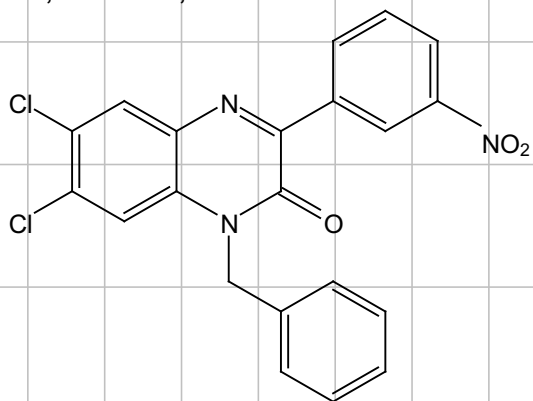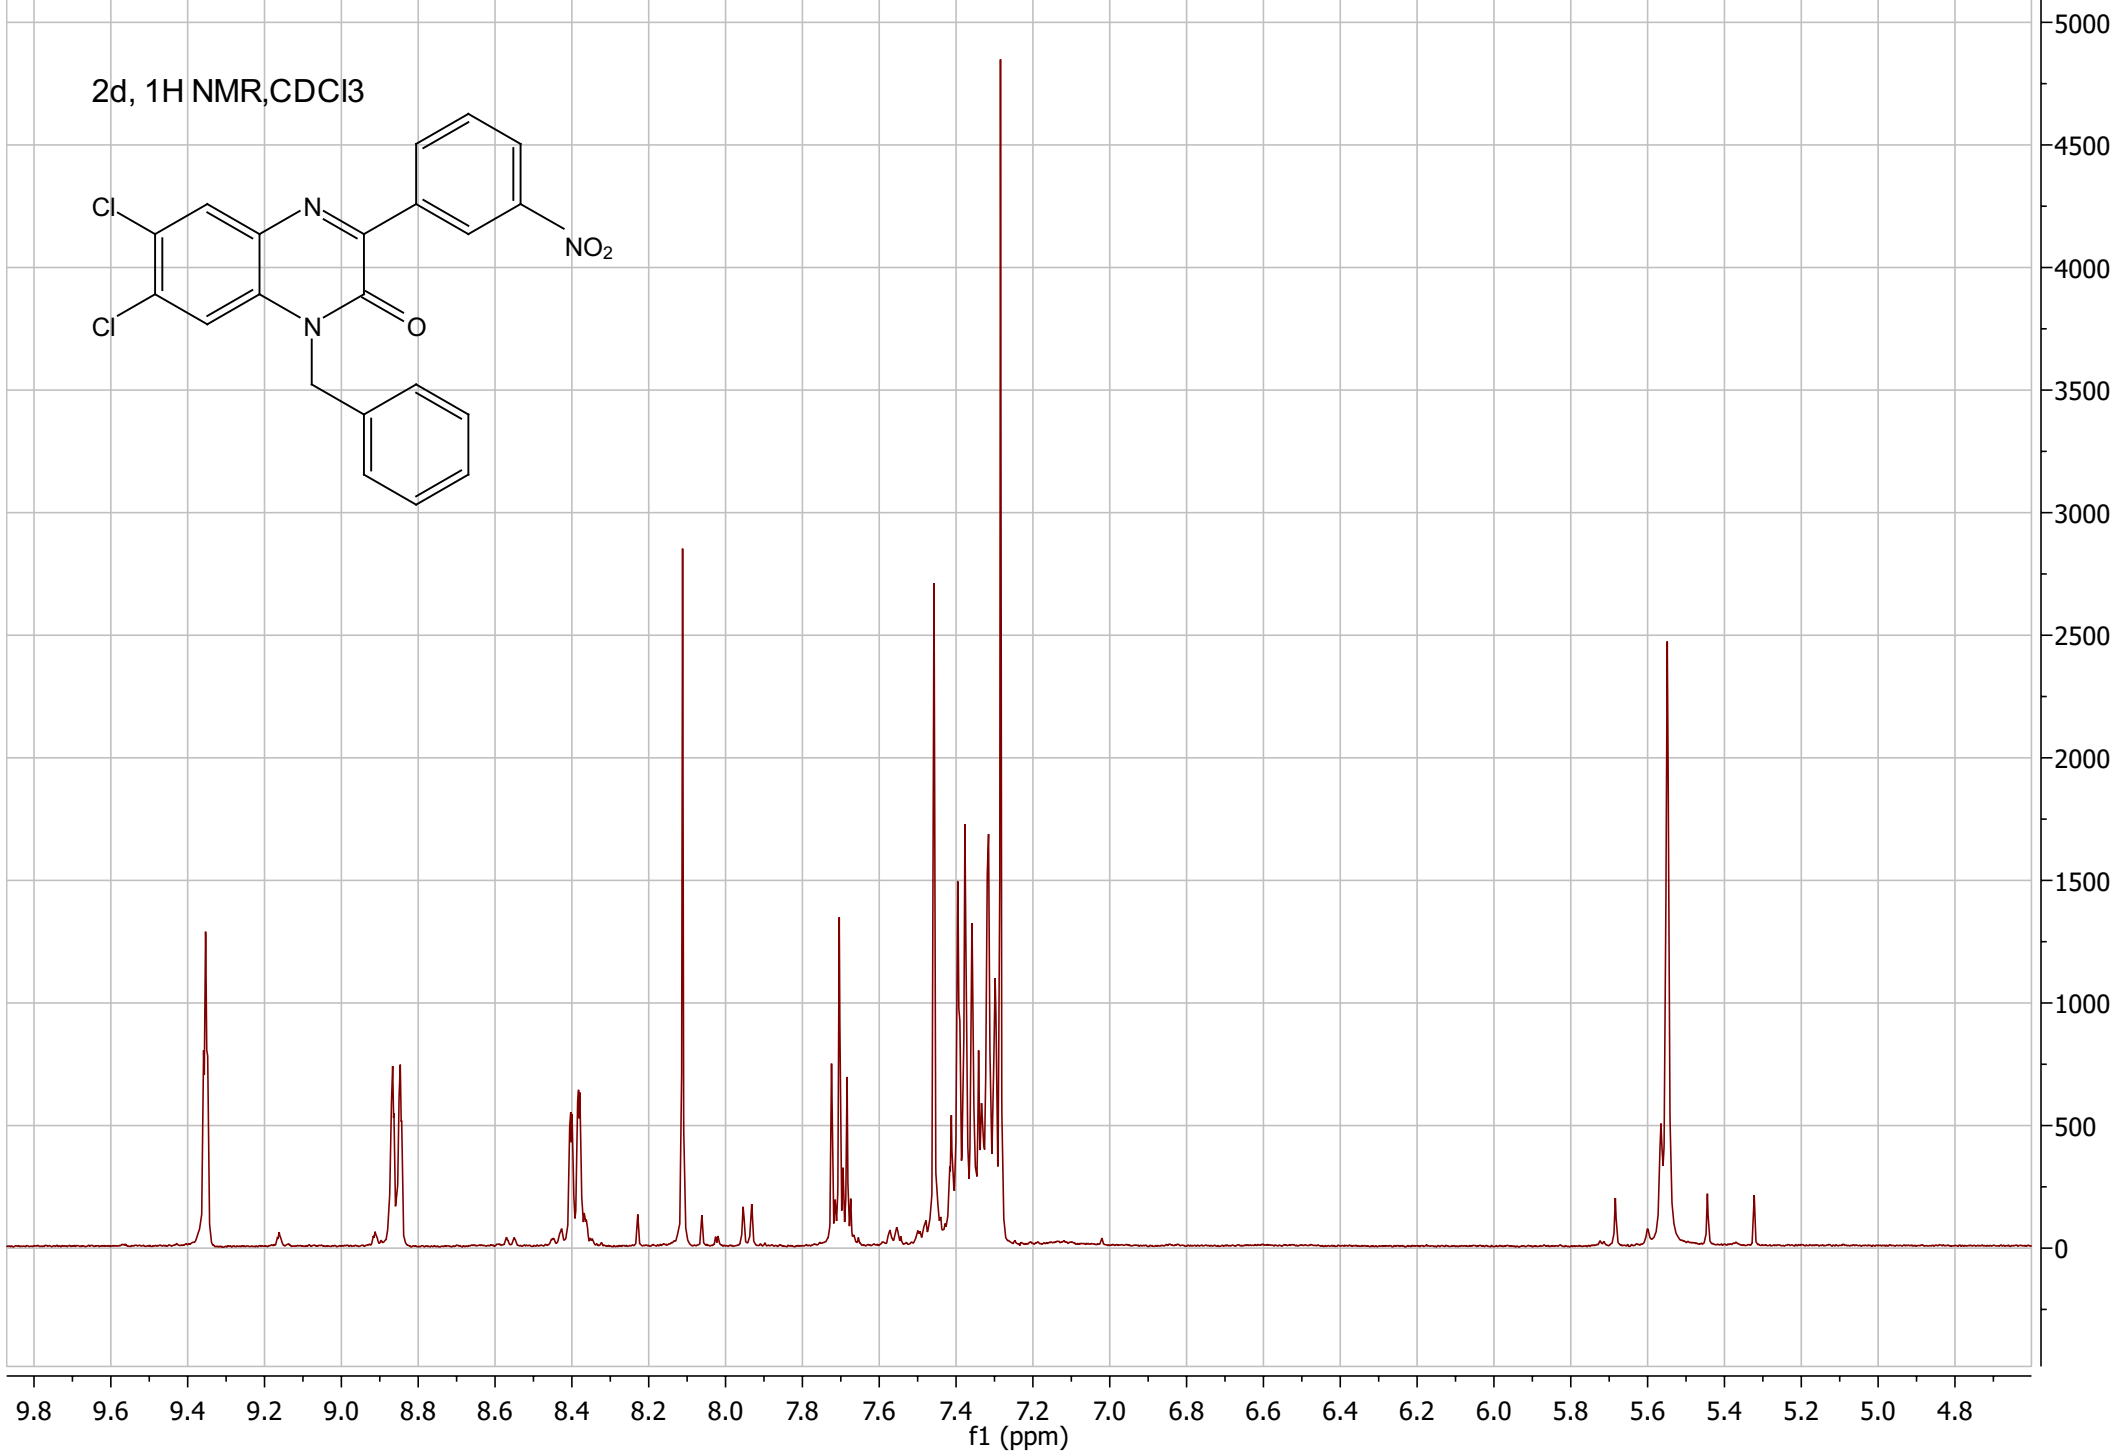

S35

2d, <sup>13</sup>C NMR, CDCl<sub>3</sub>

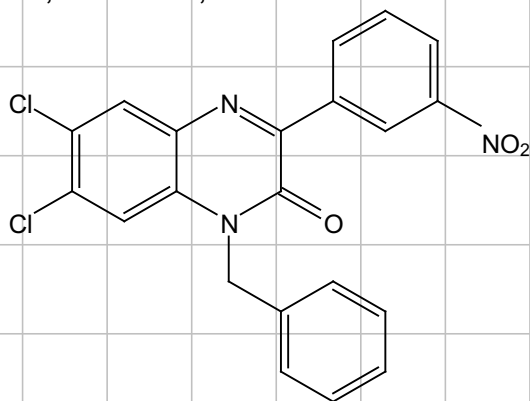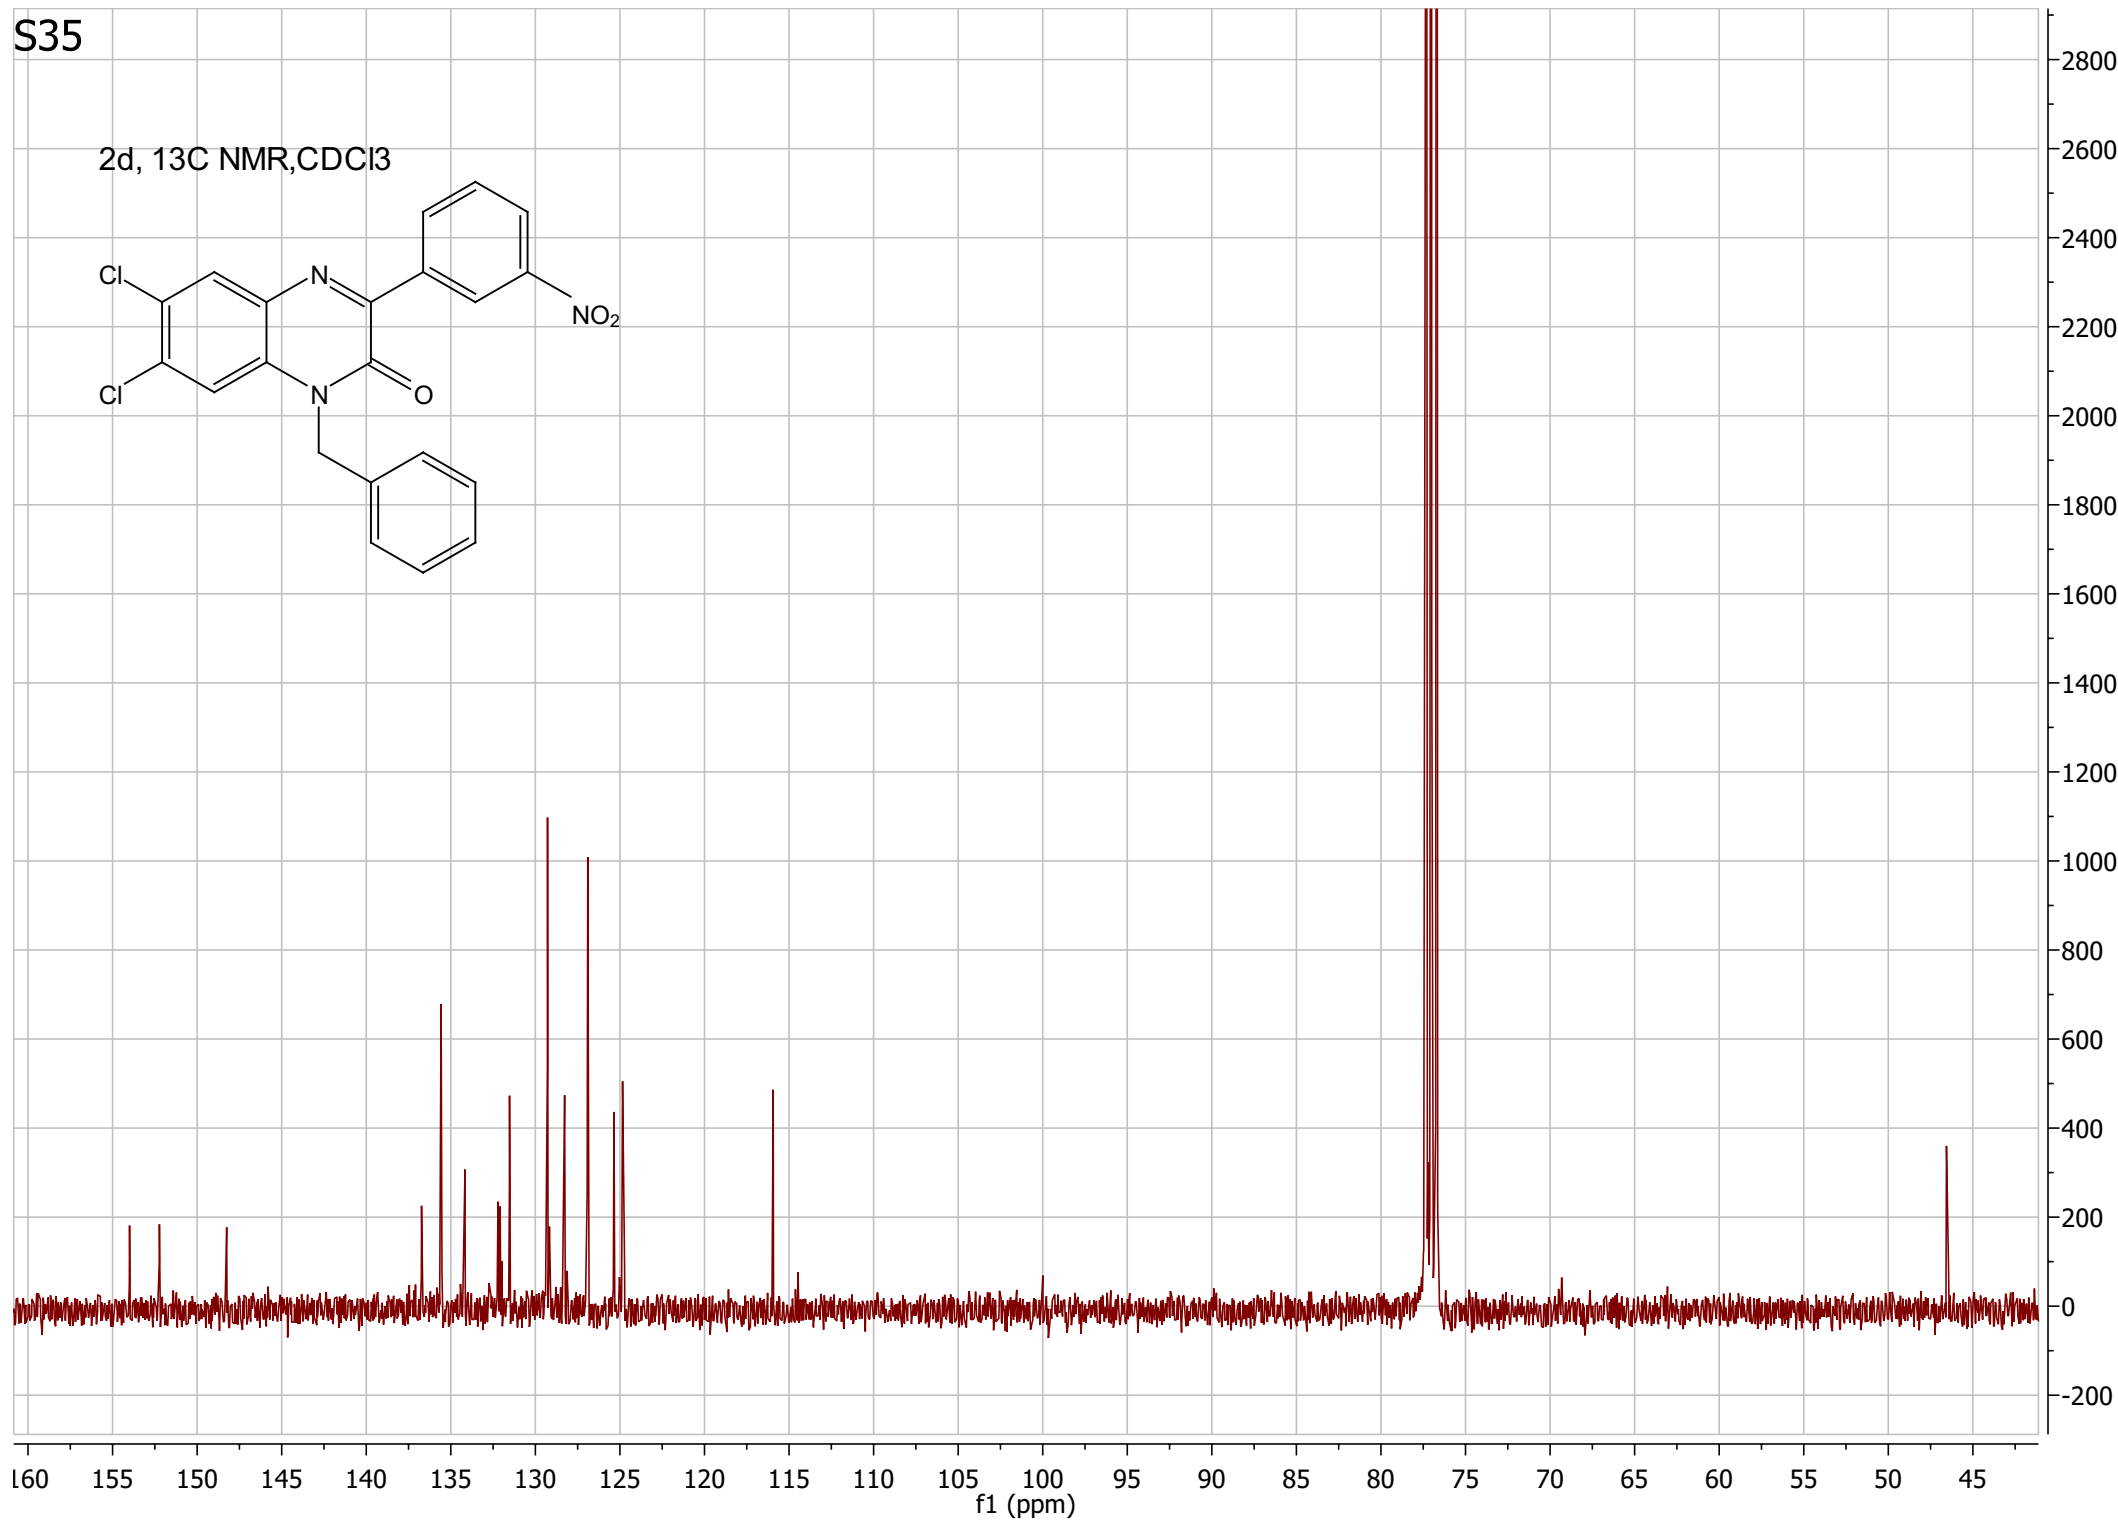

S36

2e, <sup>1</sup>H NMR, CDCl<sub>3</sub>

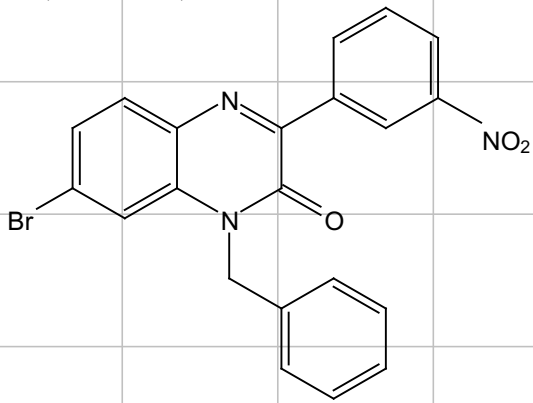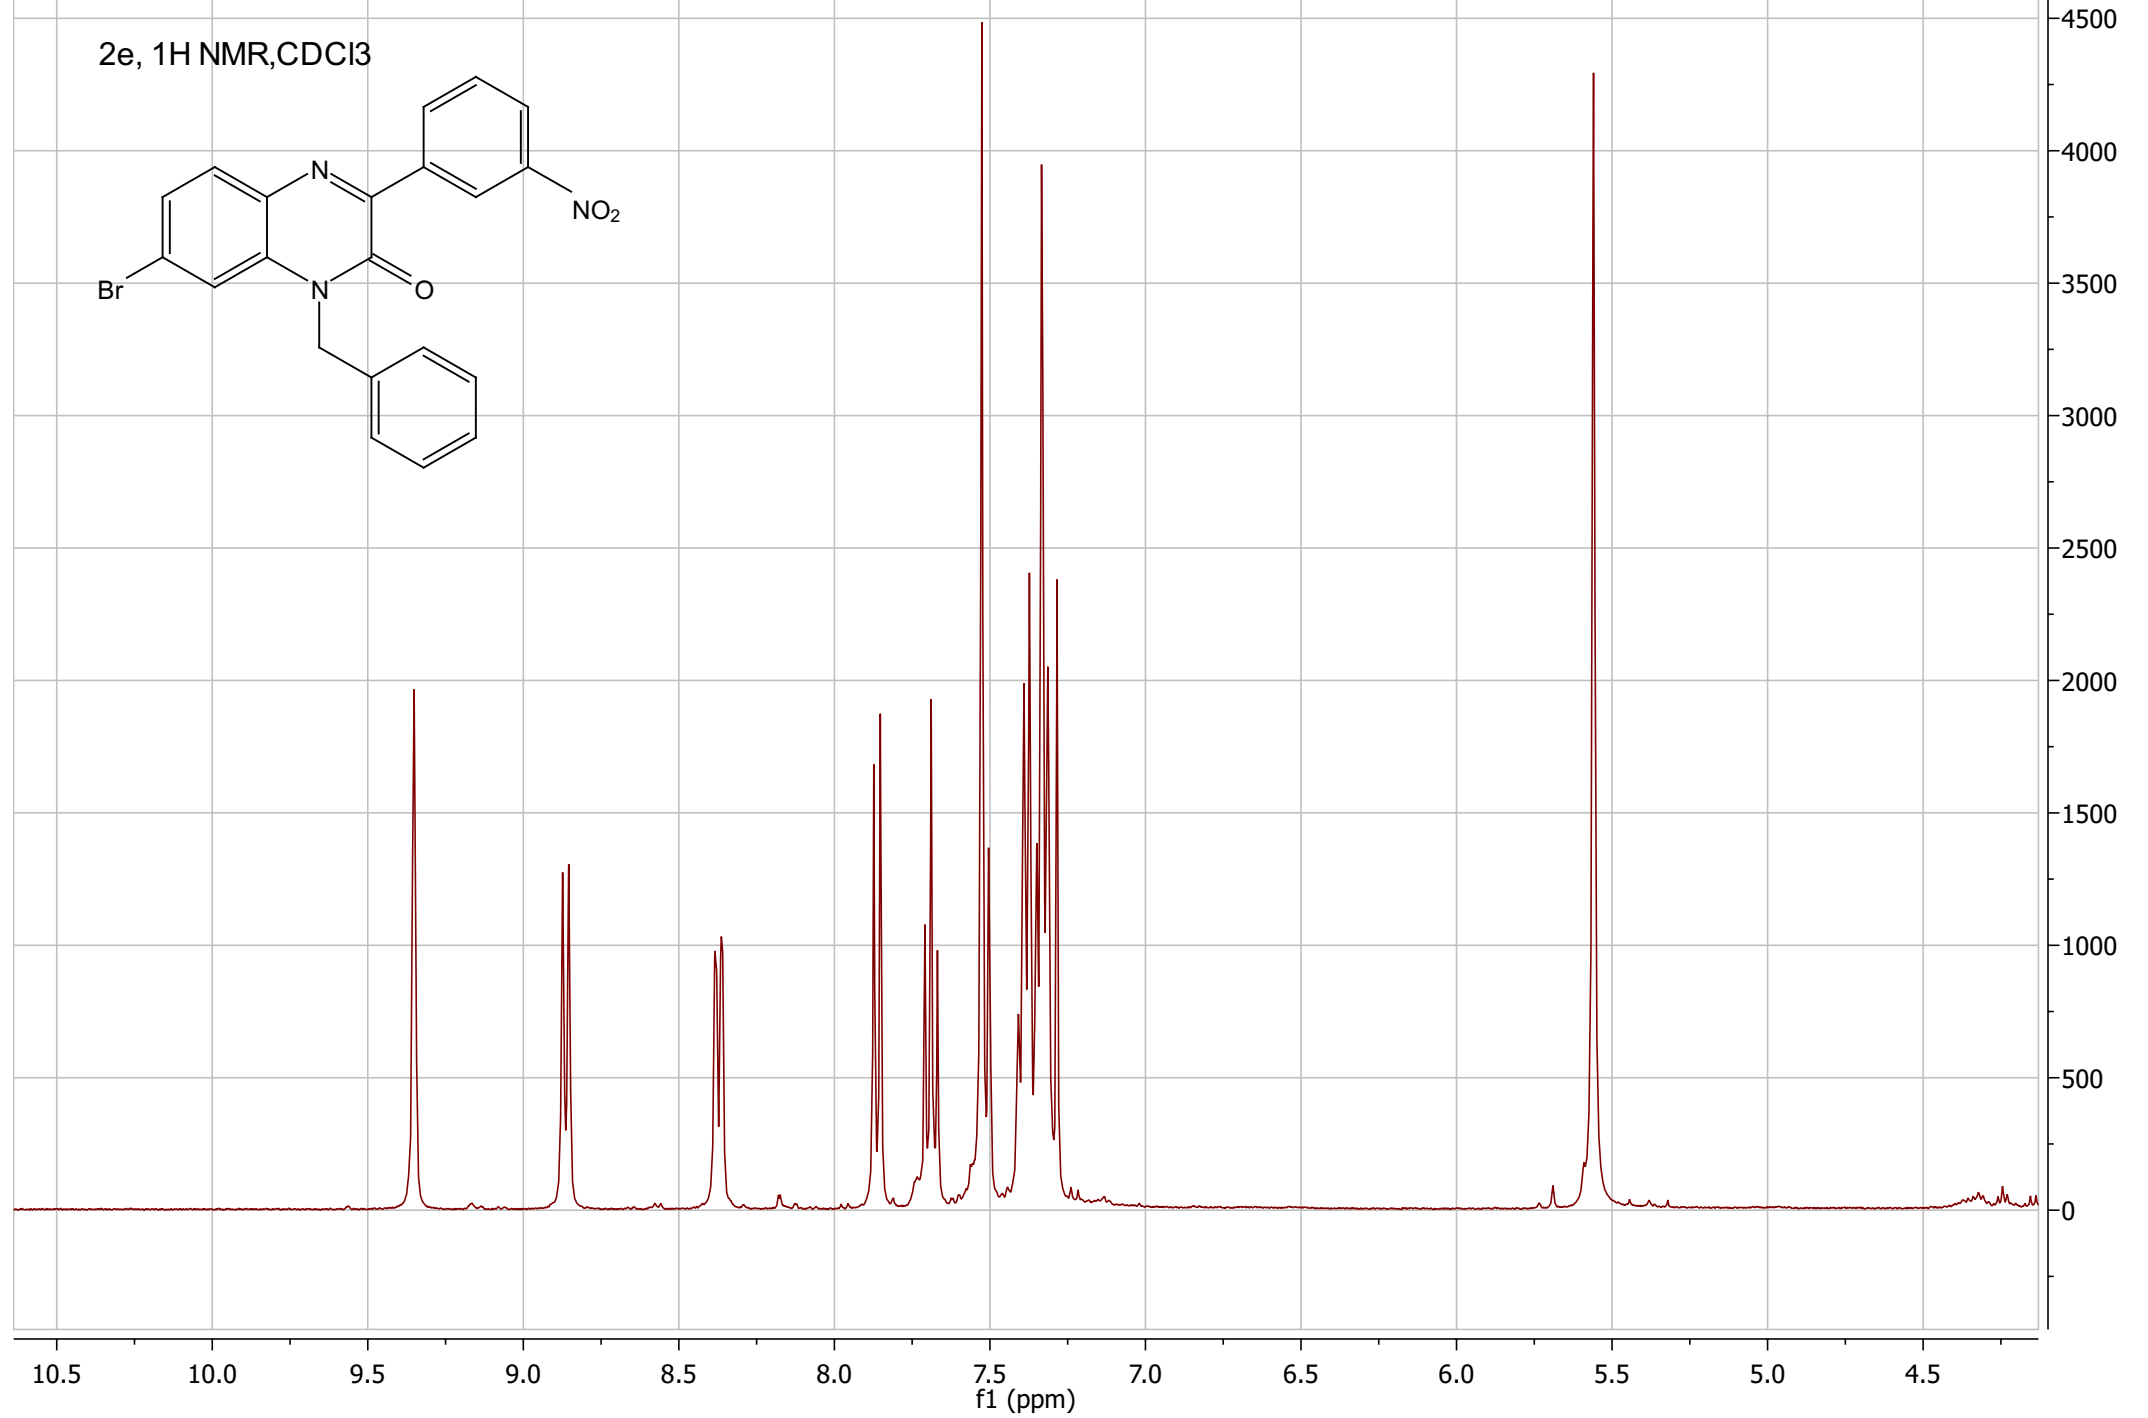

S37

2e, <sup>13</sup>C NMR, CDCl<sub>3</sub>

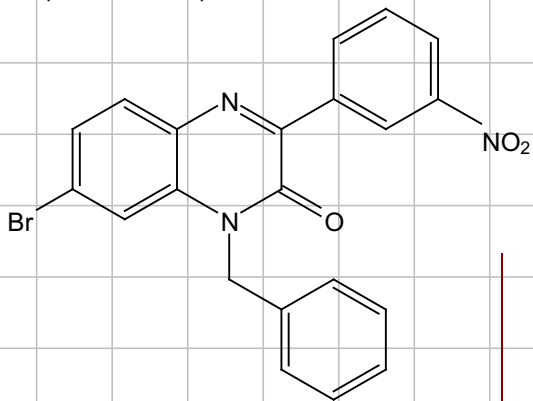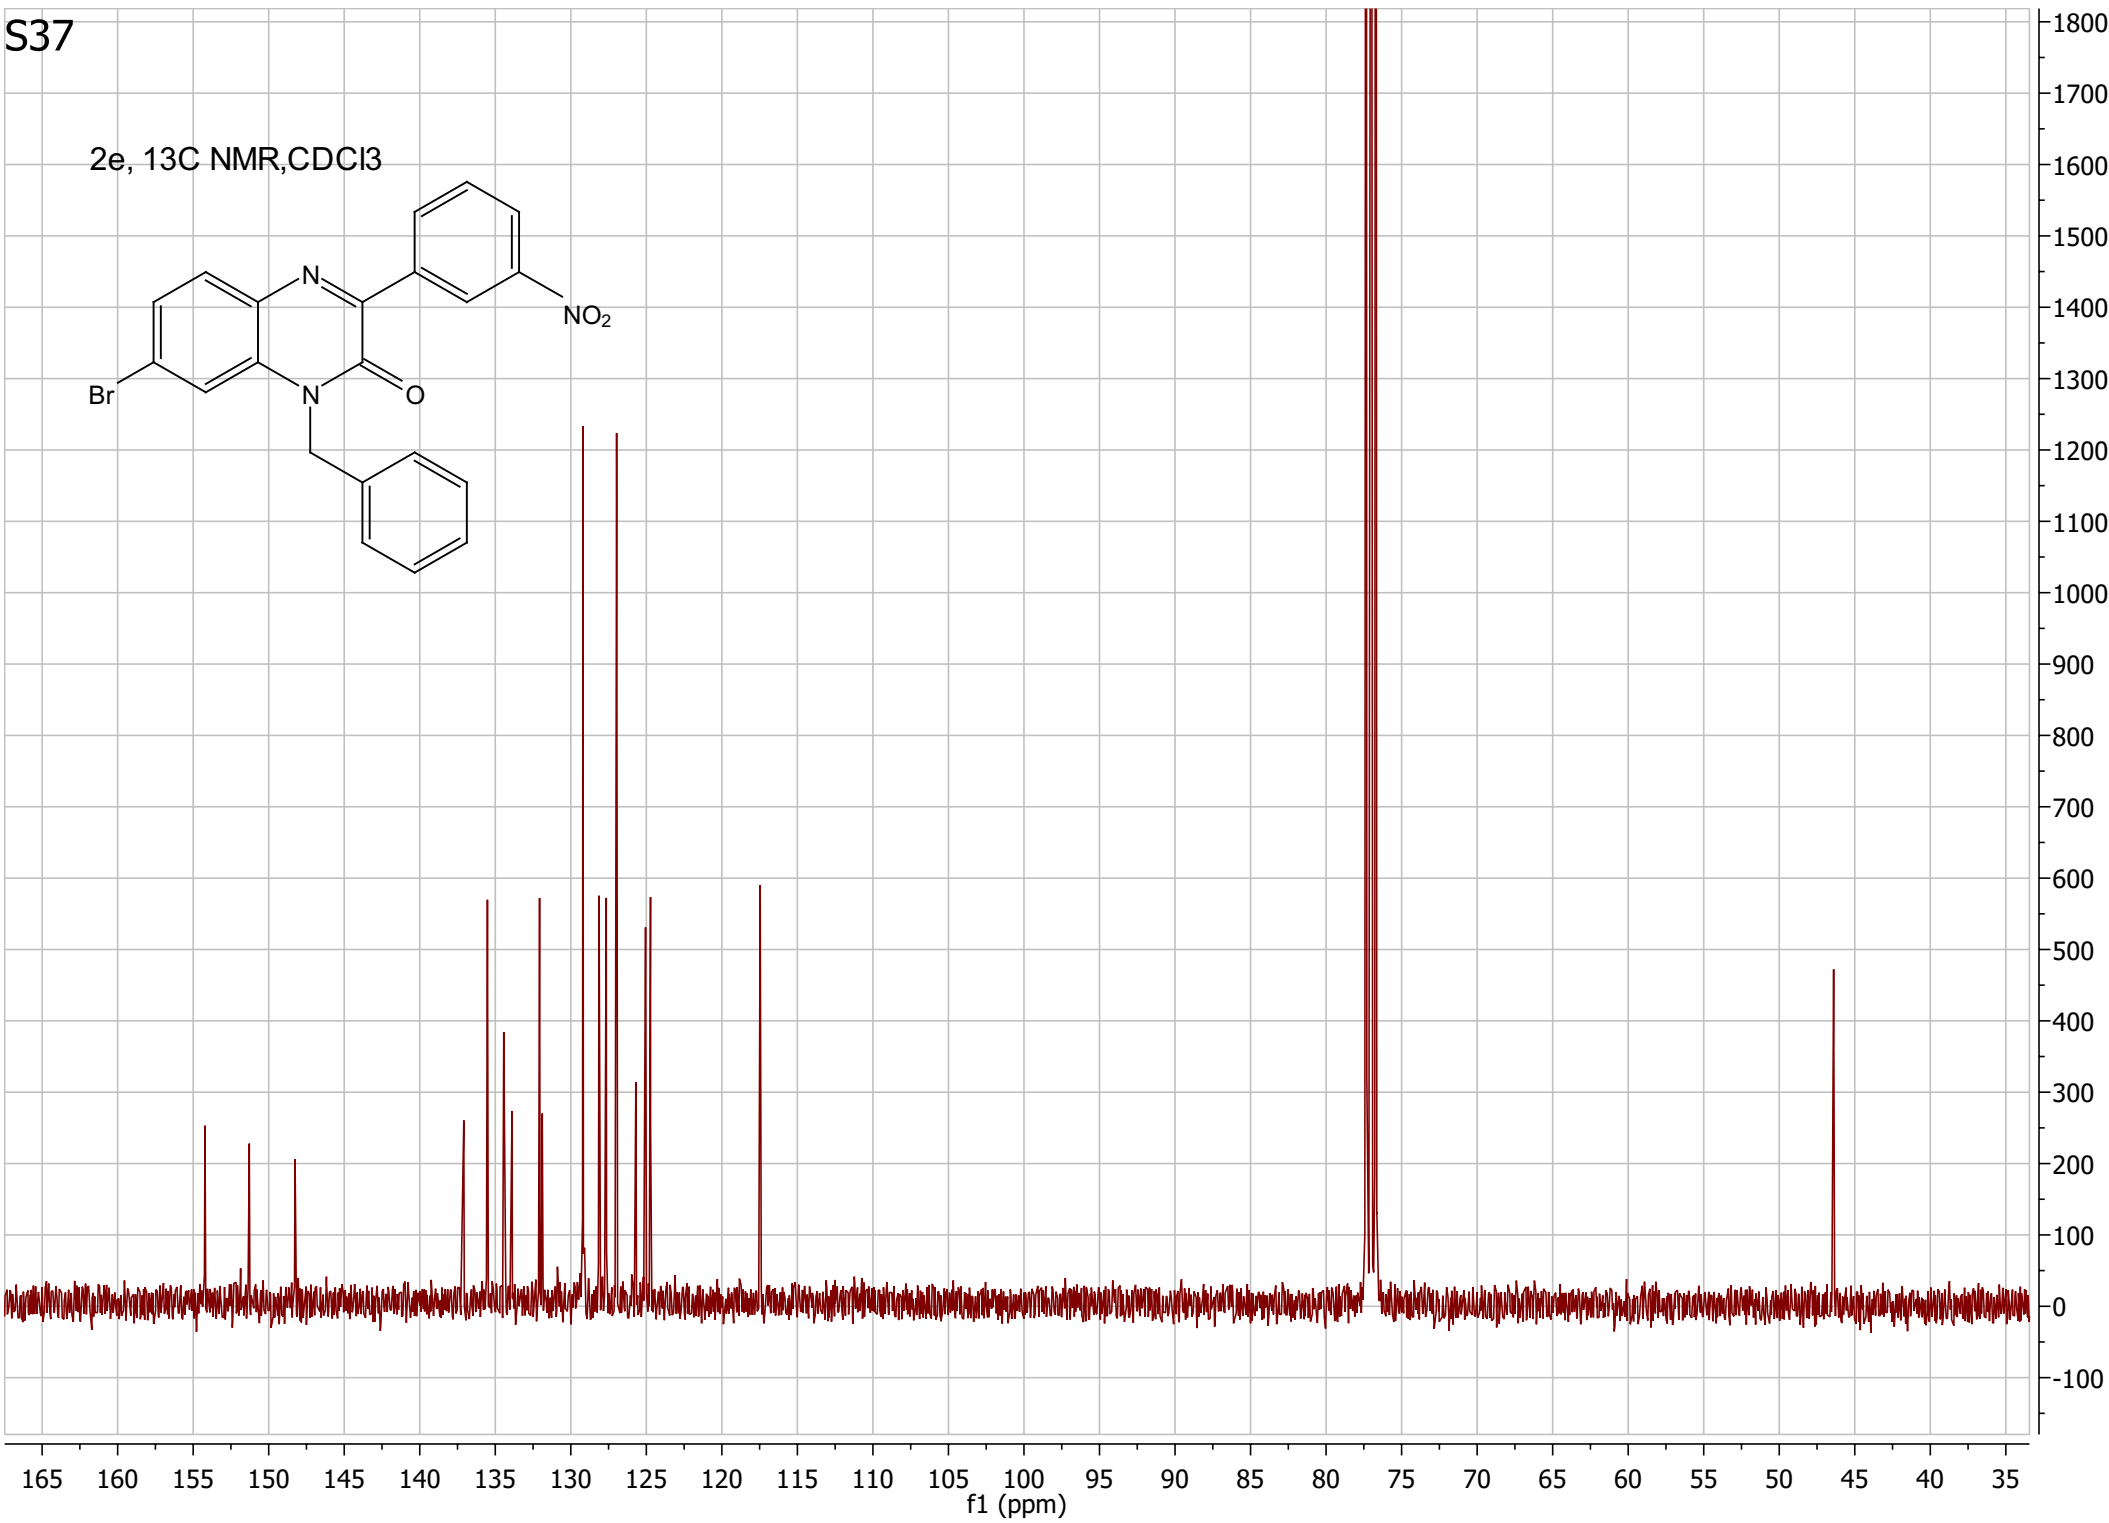

S38

2f, 1H NMR, CDCl3

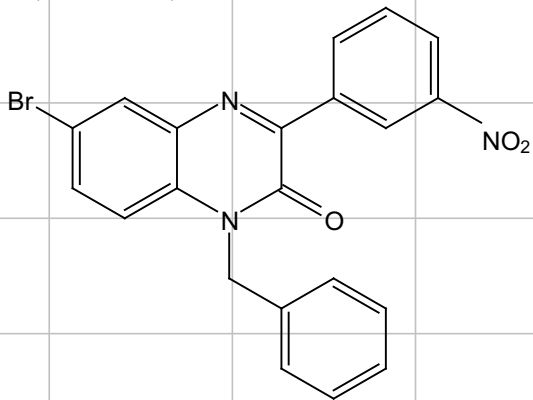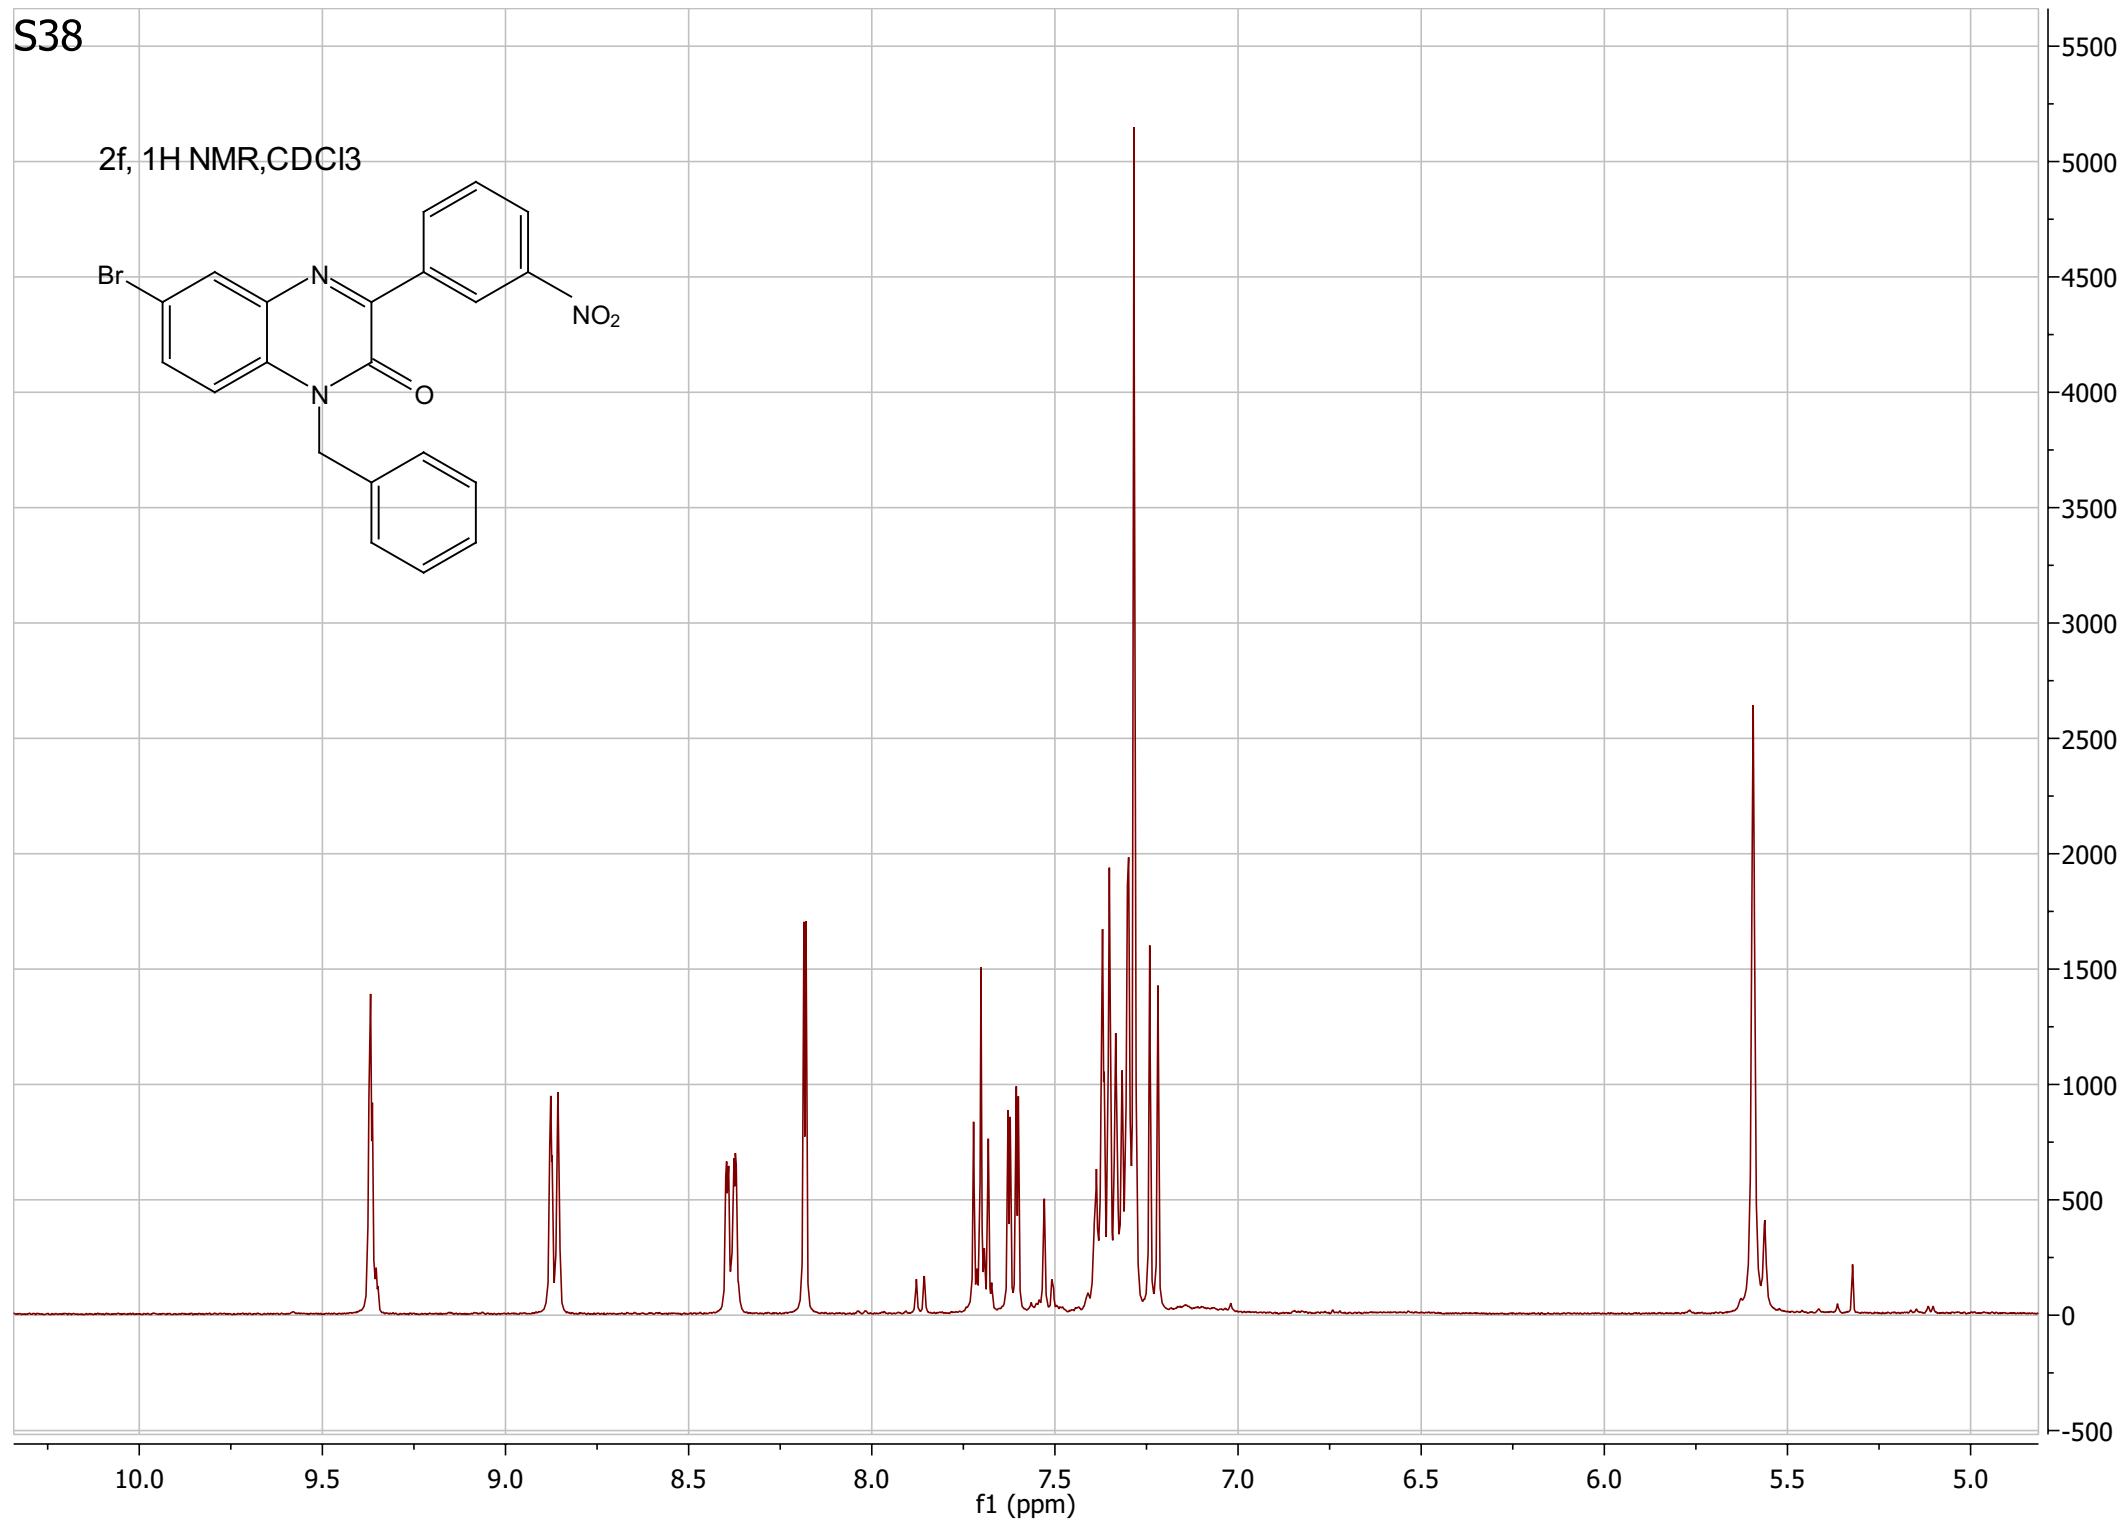

S39

2f, <sup>13</sup>C NMR, CDCl<sub>3</sub>

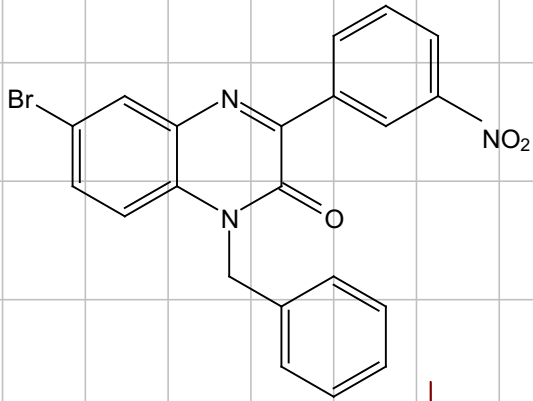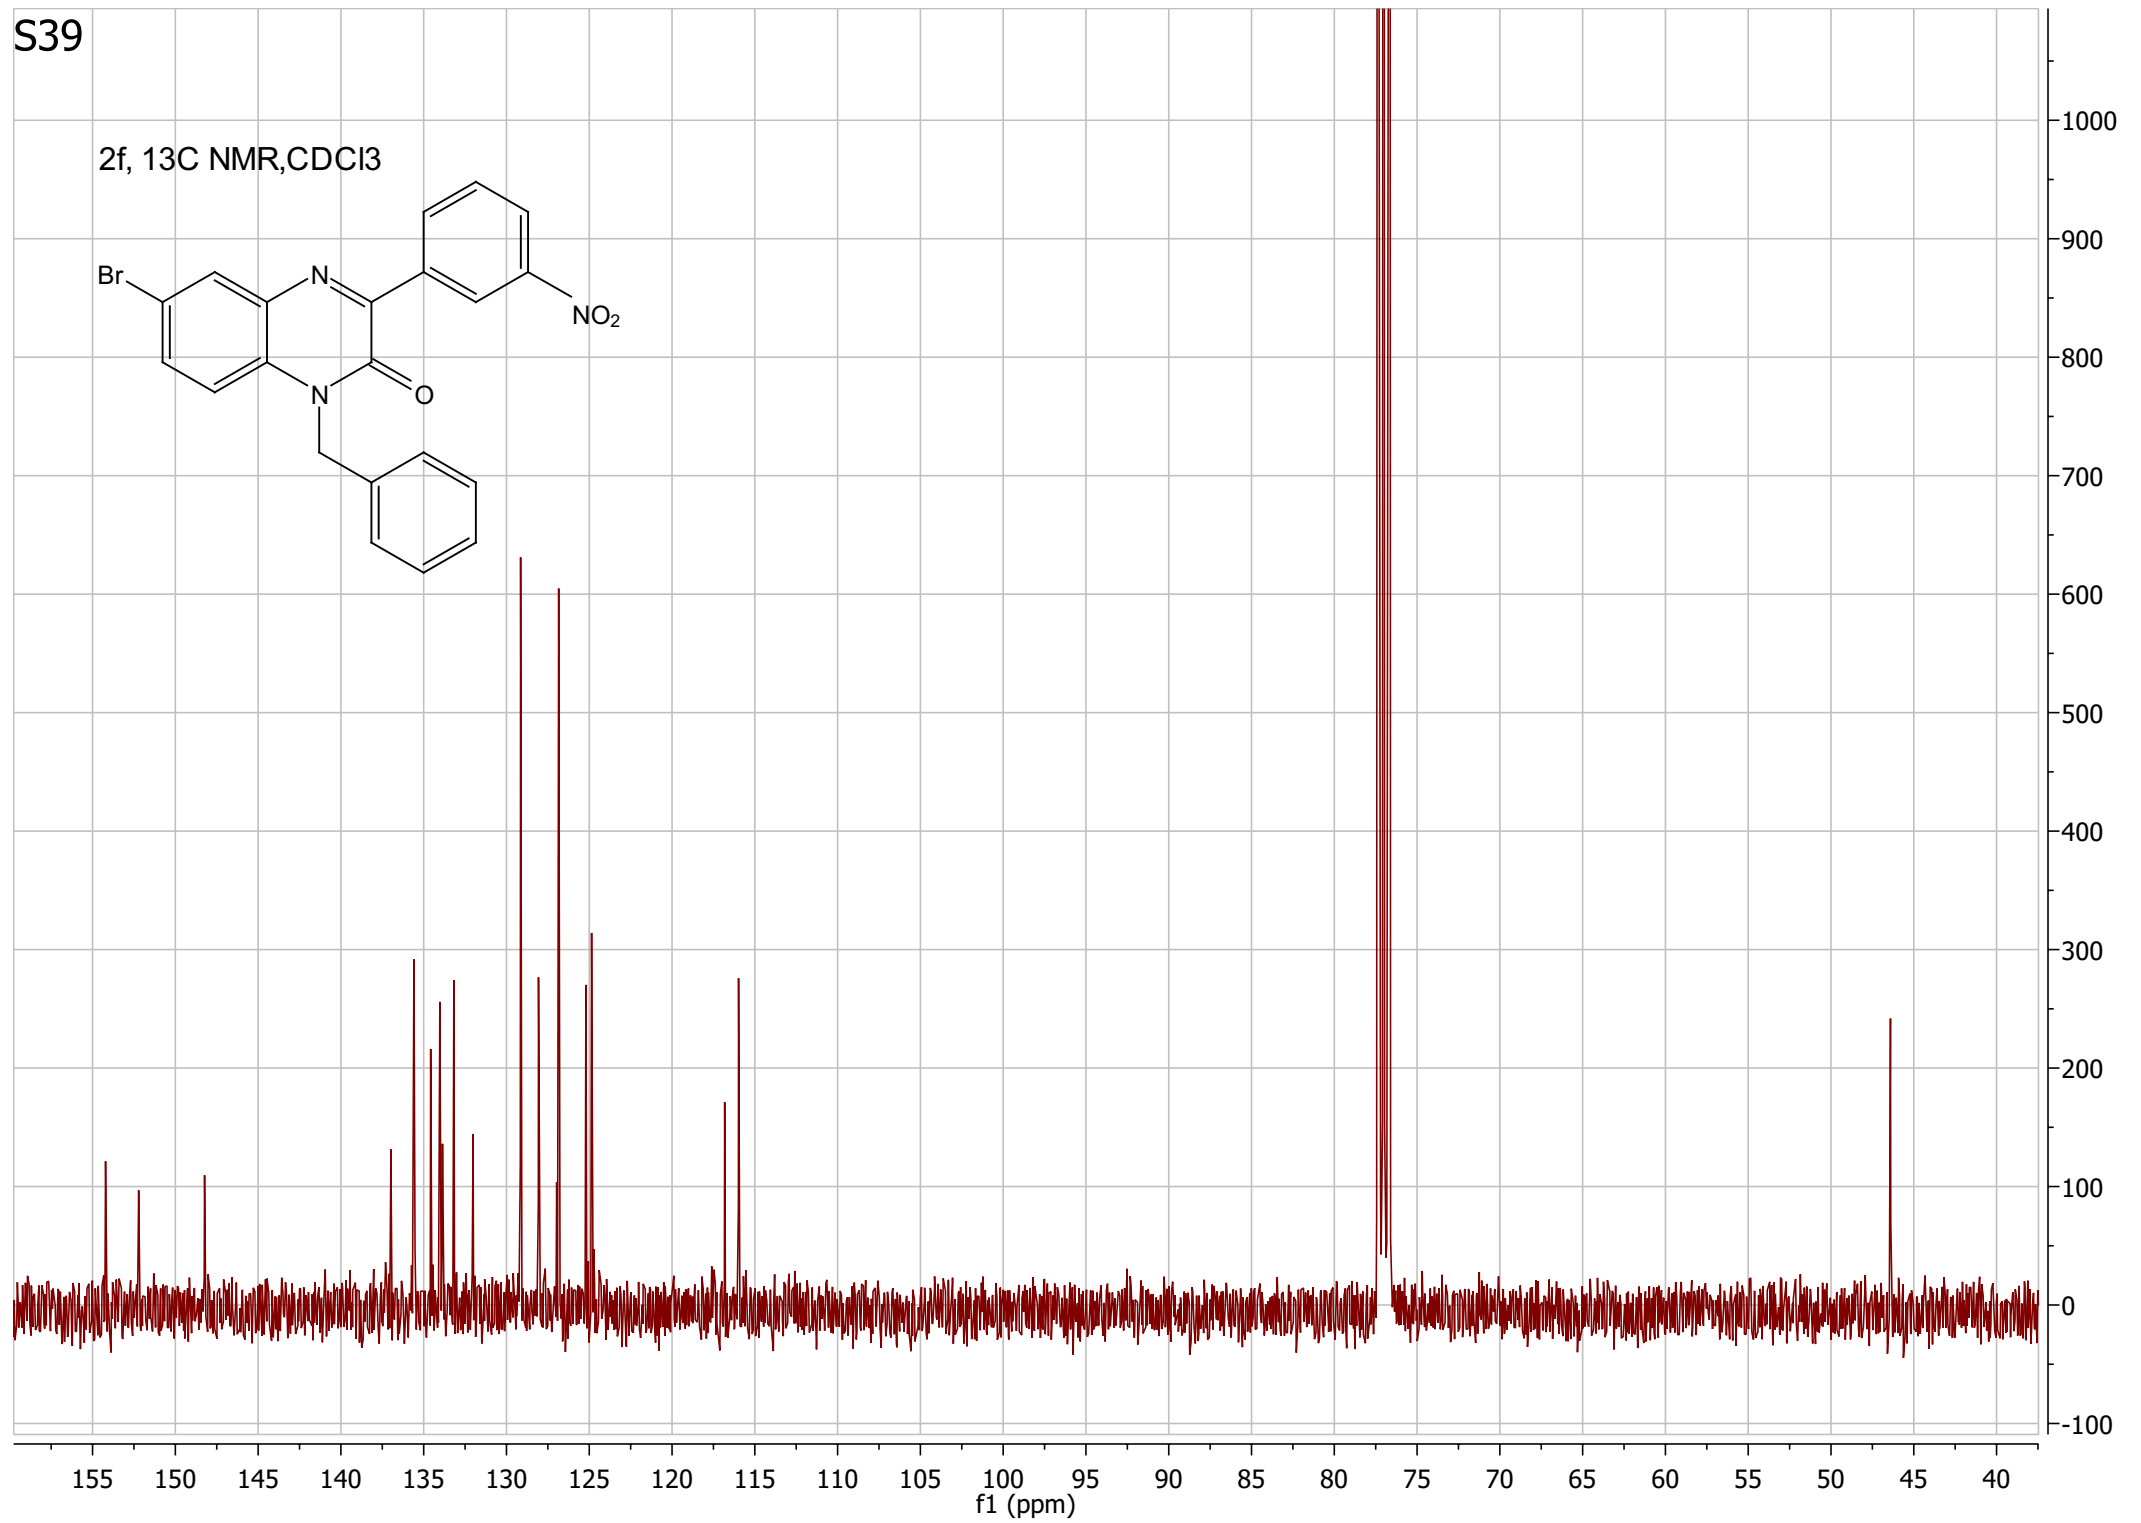

S40

2g, <sup>1</sup>H NMR, CDCl<sub>3</sub>

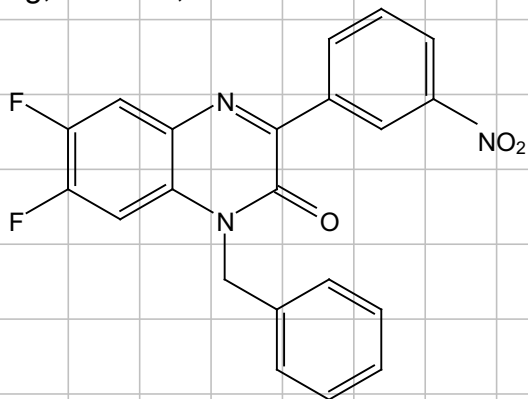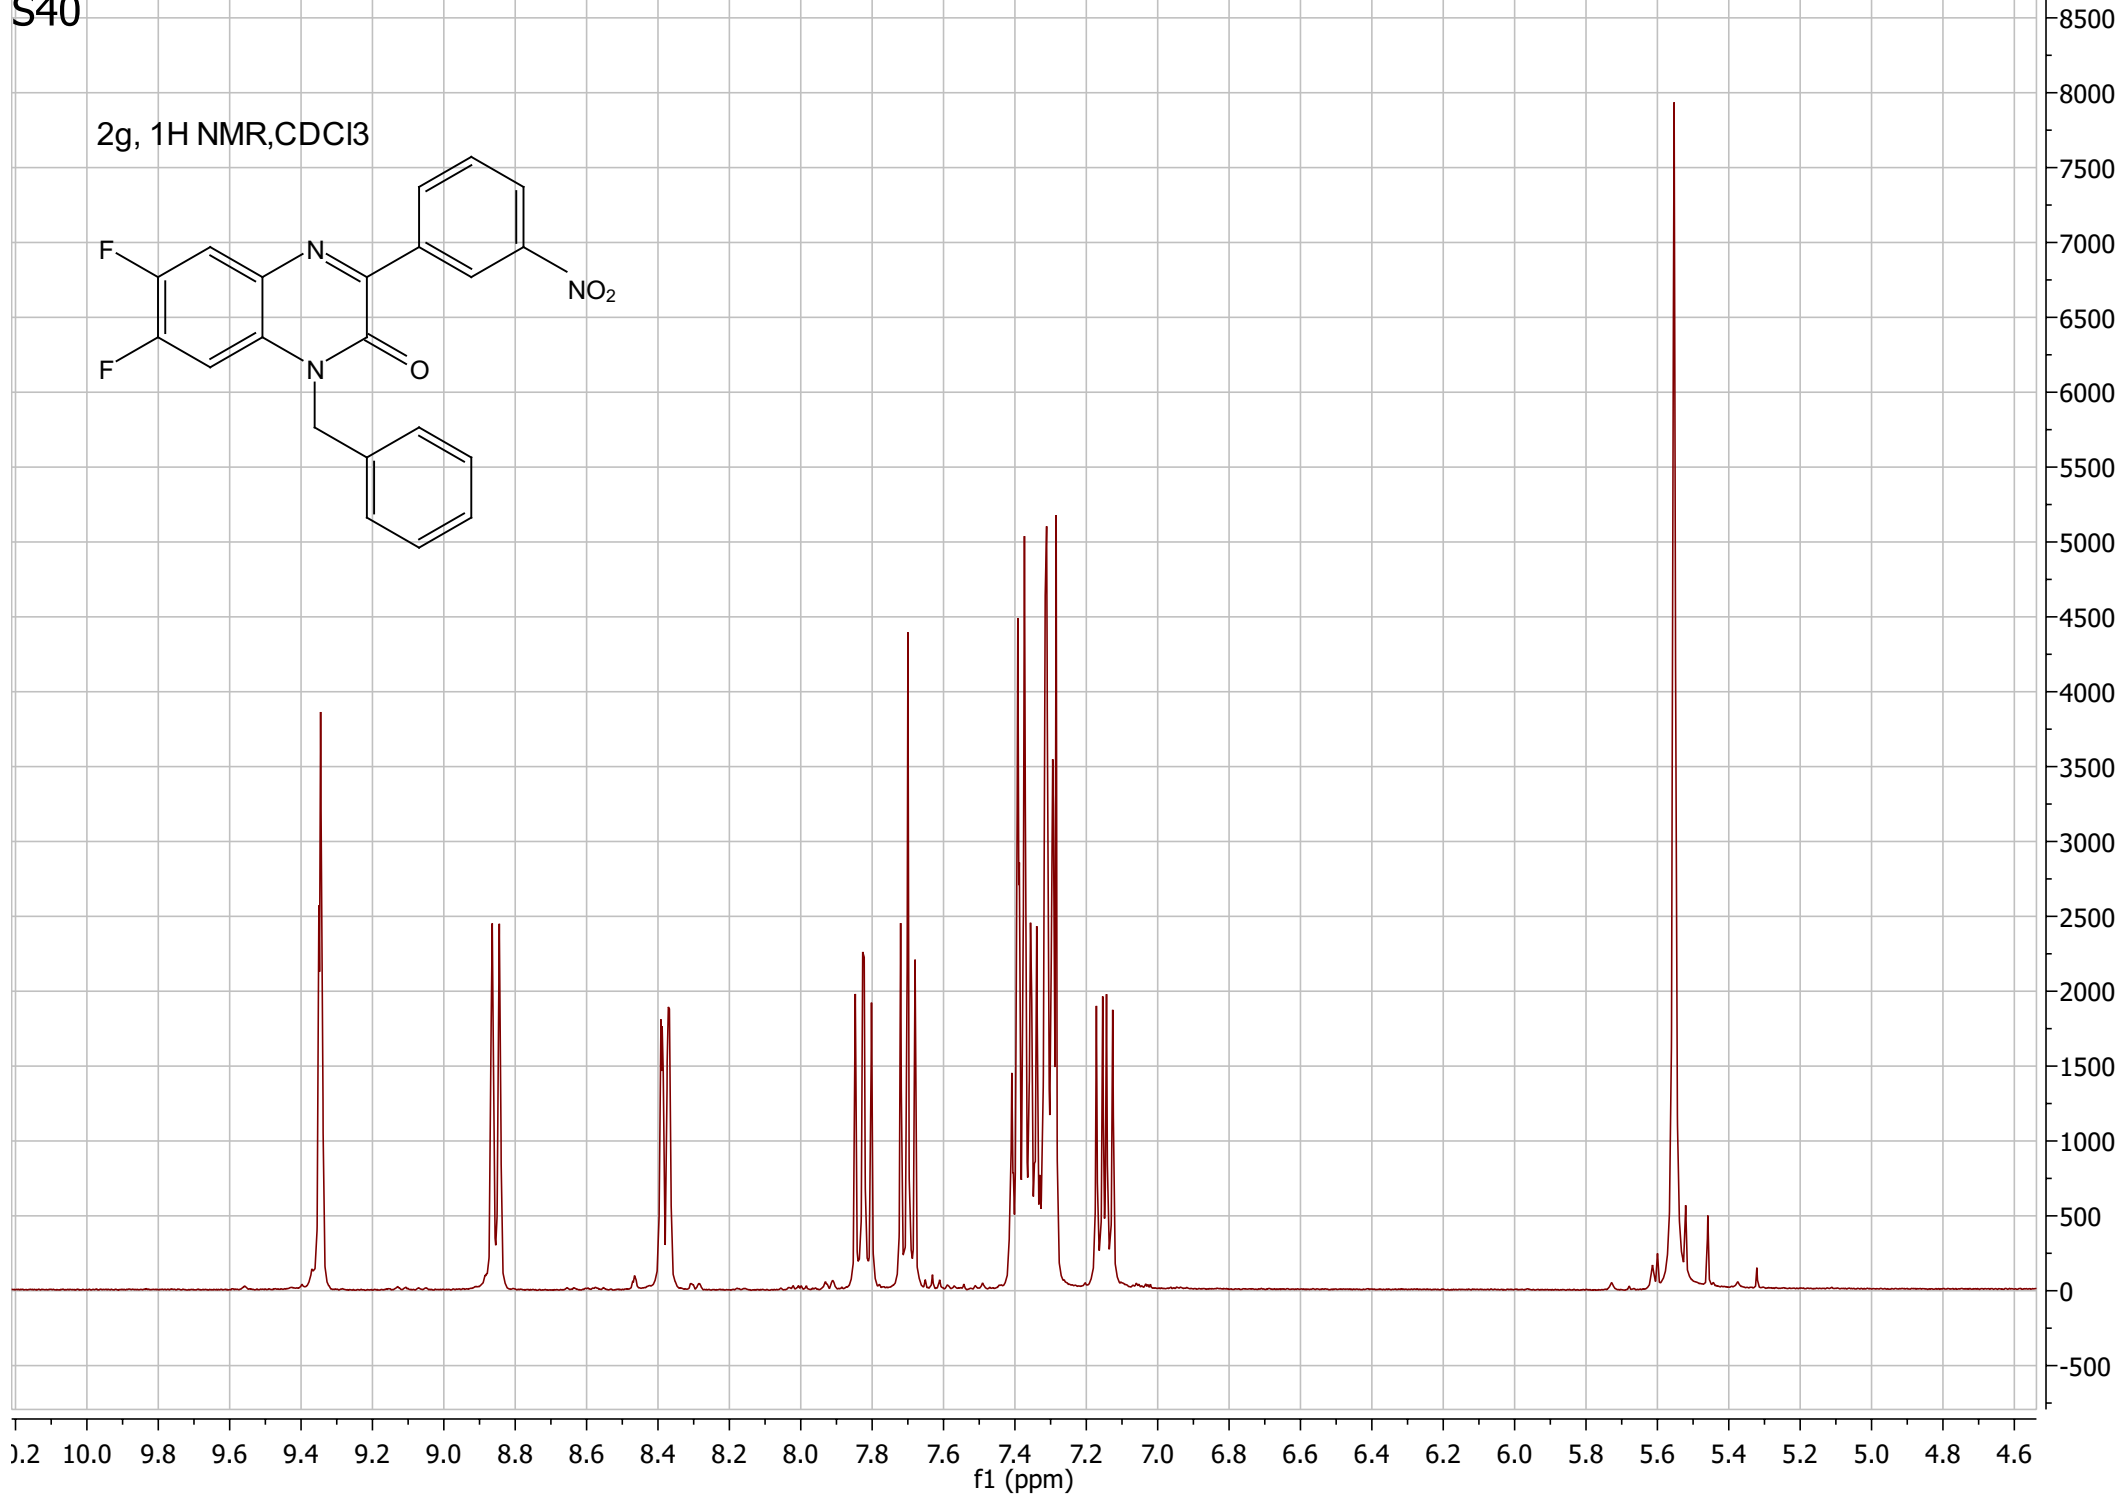



S41

2g, <sup>13</sup>C NMR, CDCl<sub>3</sub>

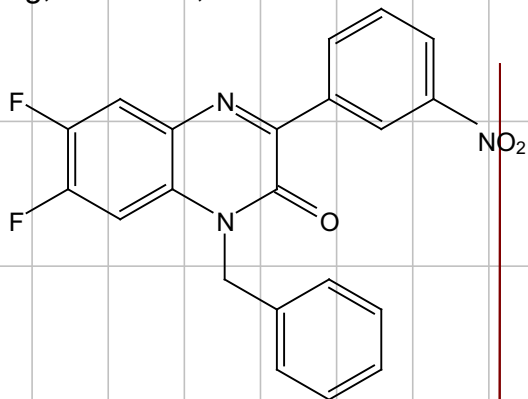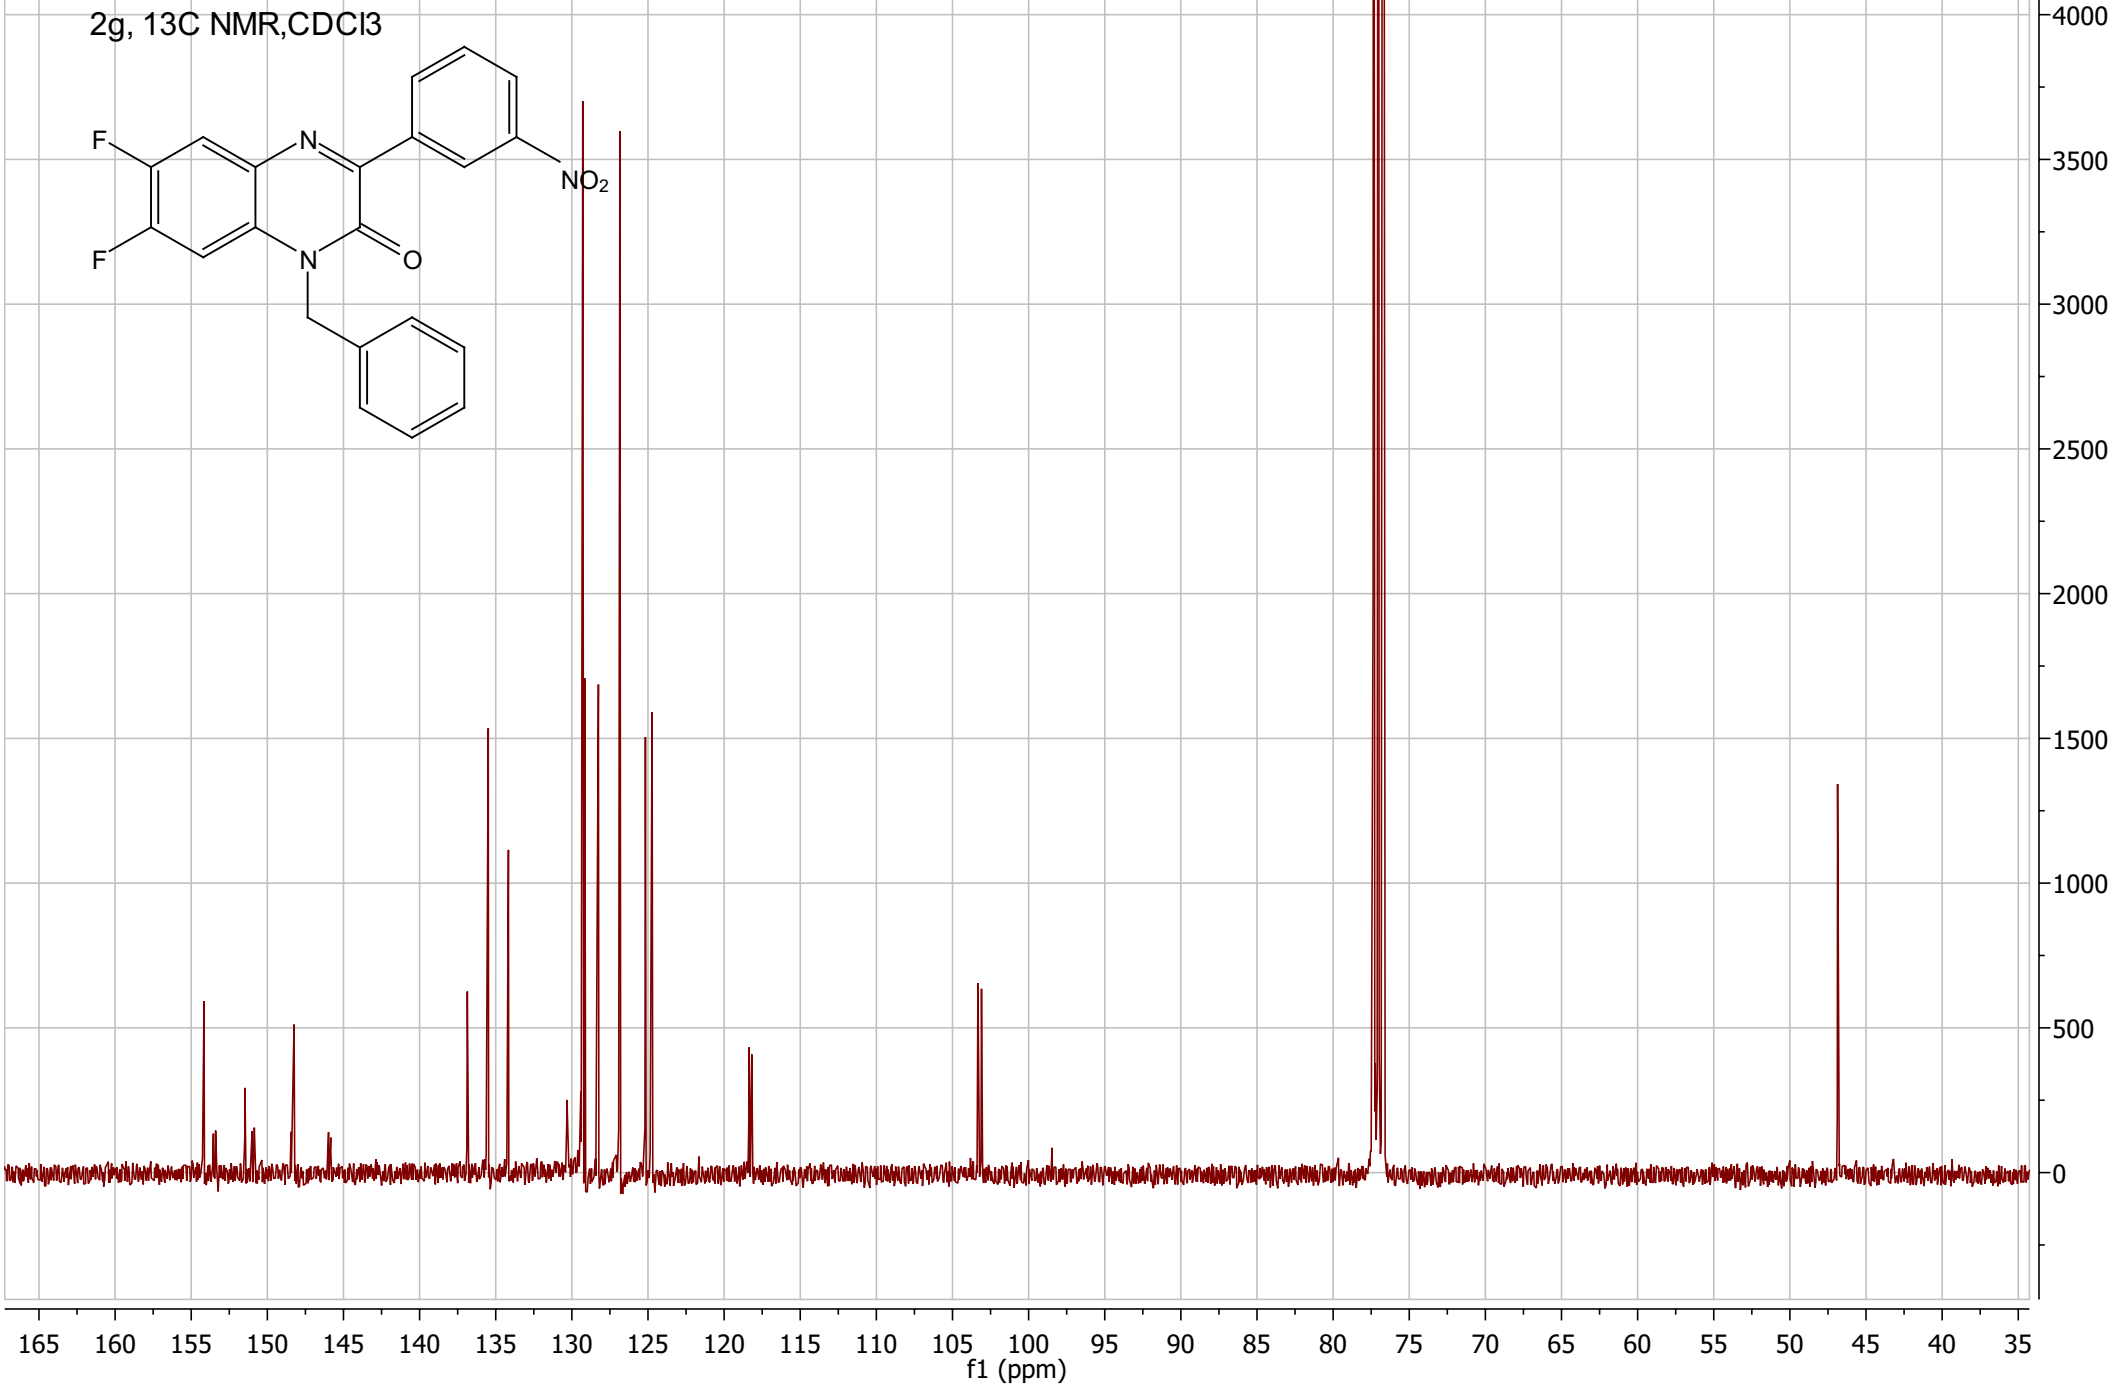

S42

2h, 1H NMR, CDCl3

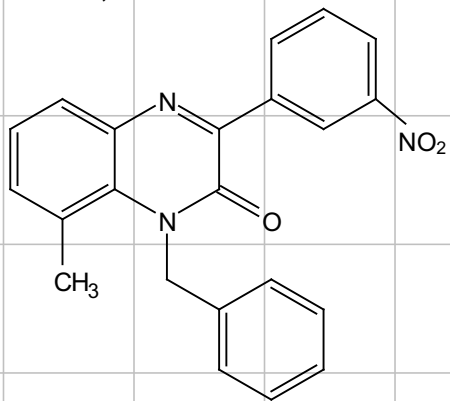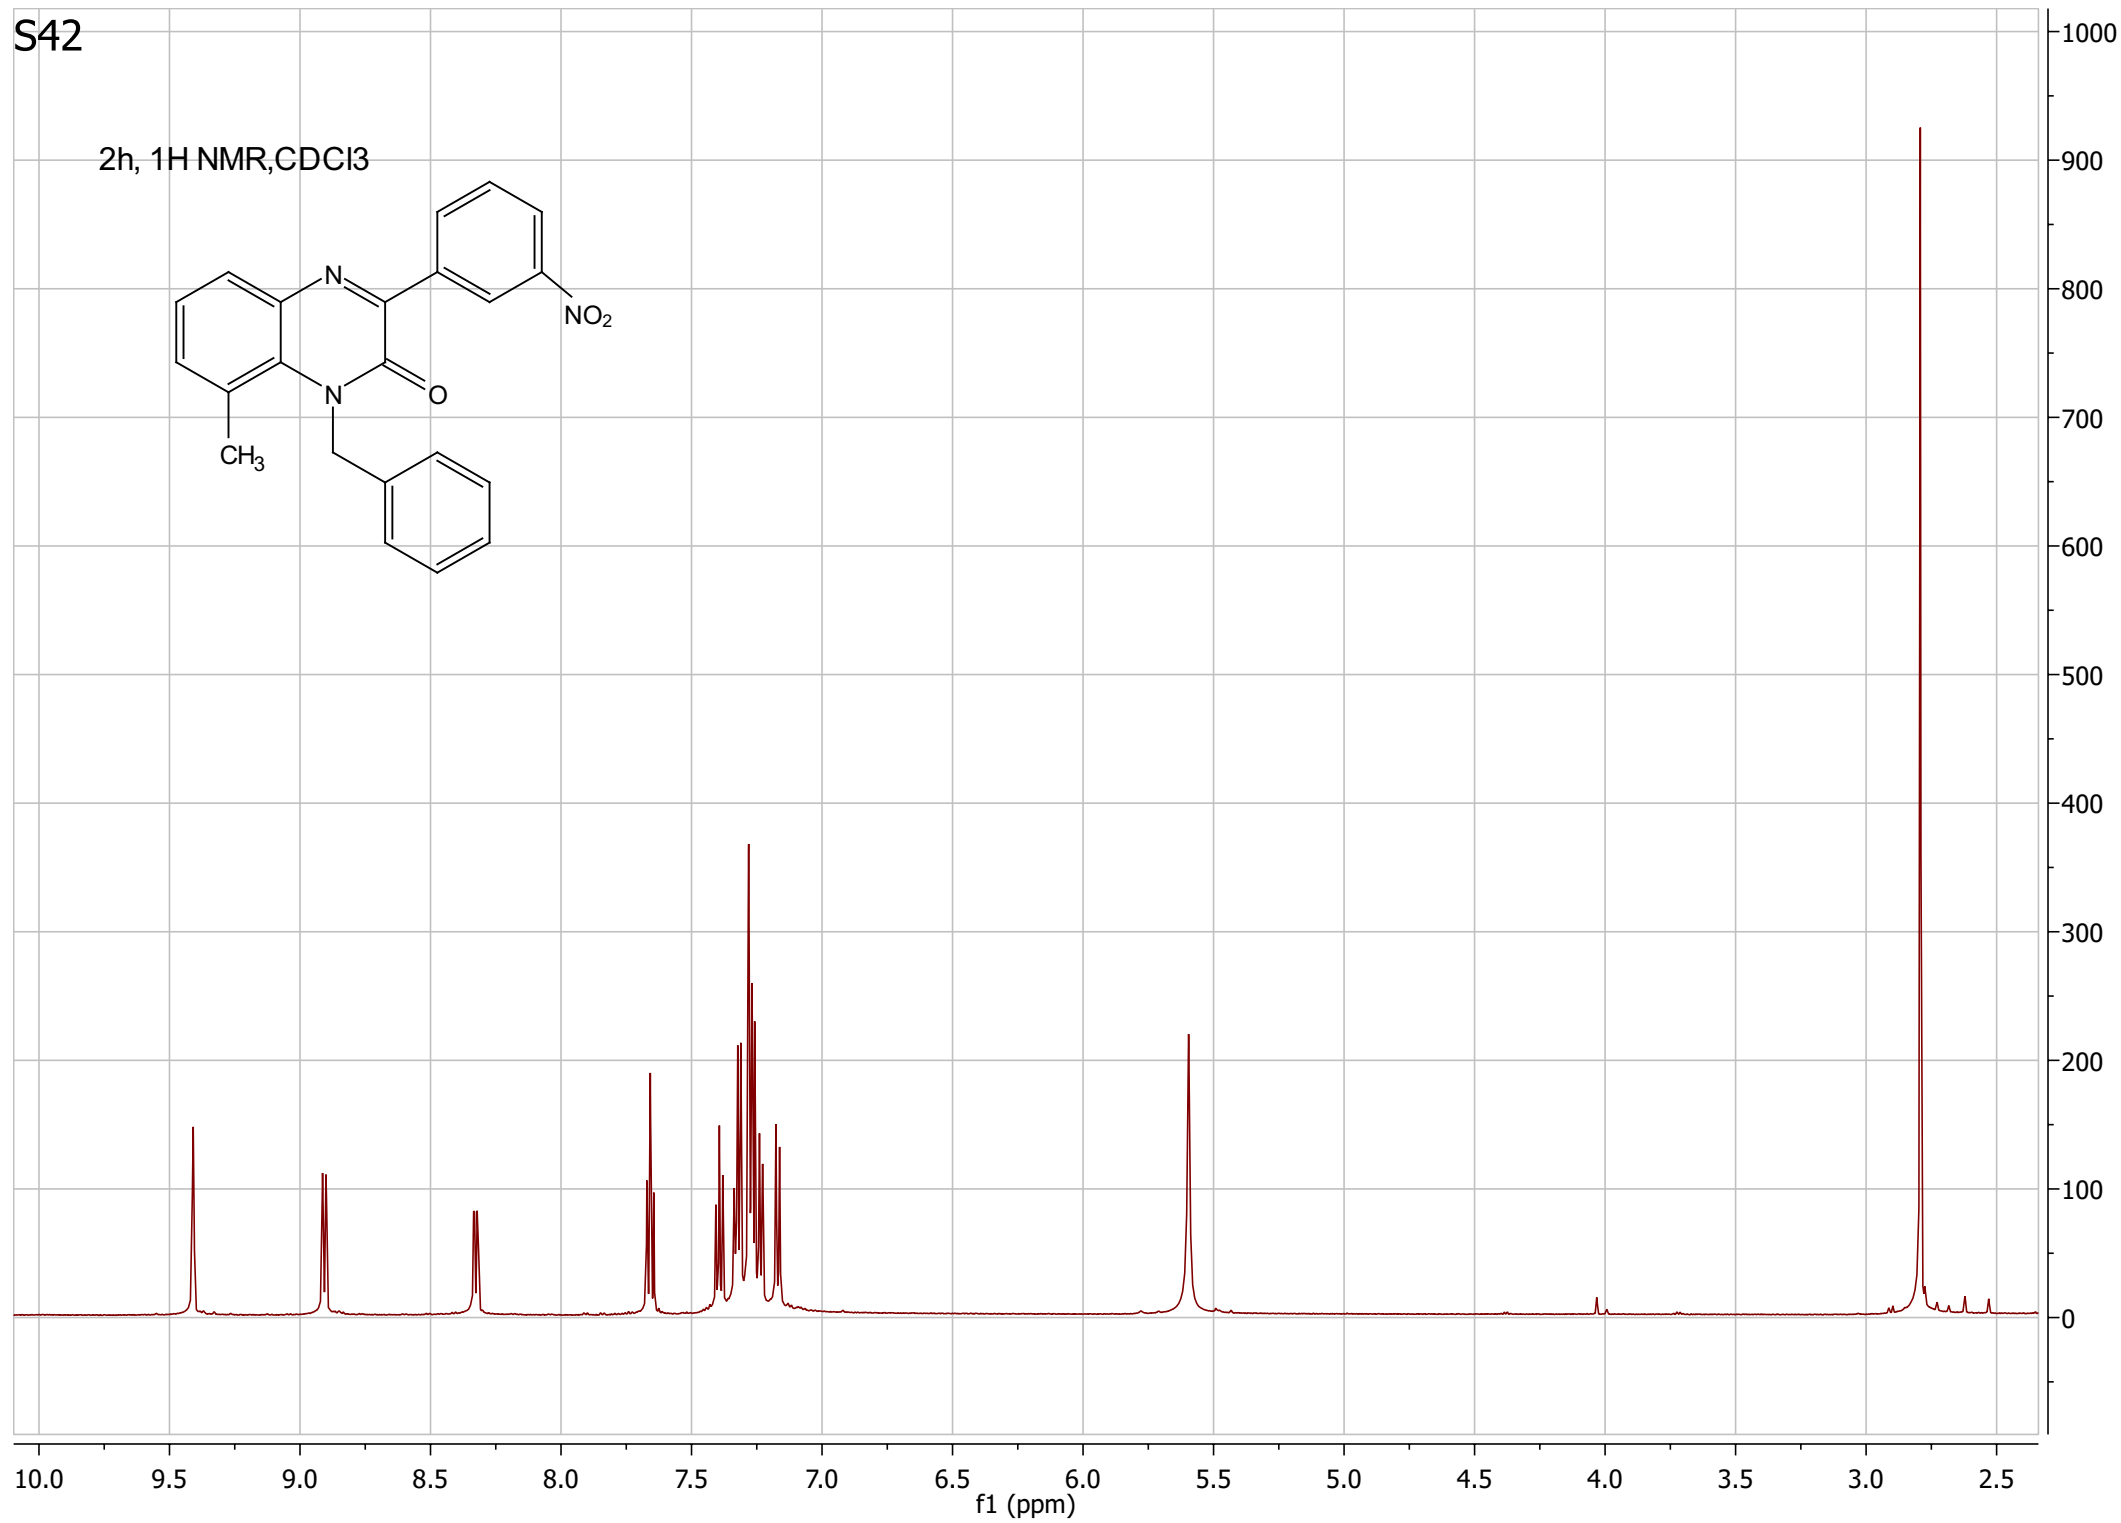

S43

2h, <sup>13</sup>C NMR, CDCl<sub>3</sub>

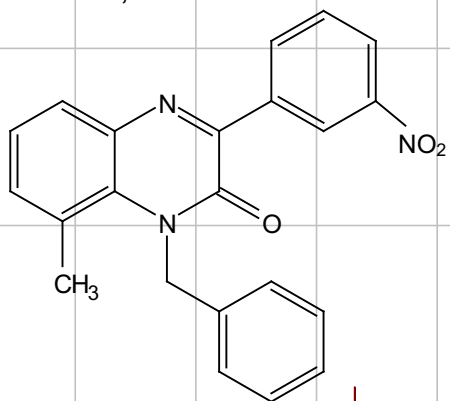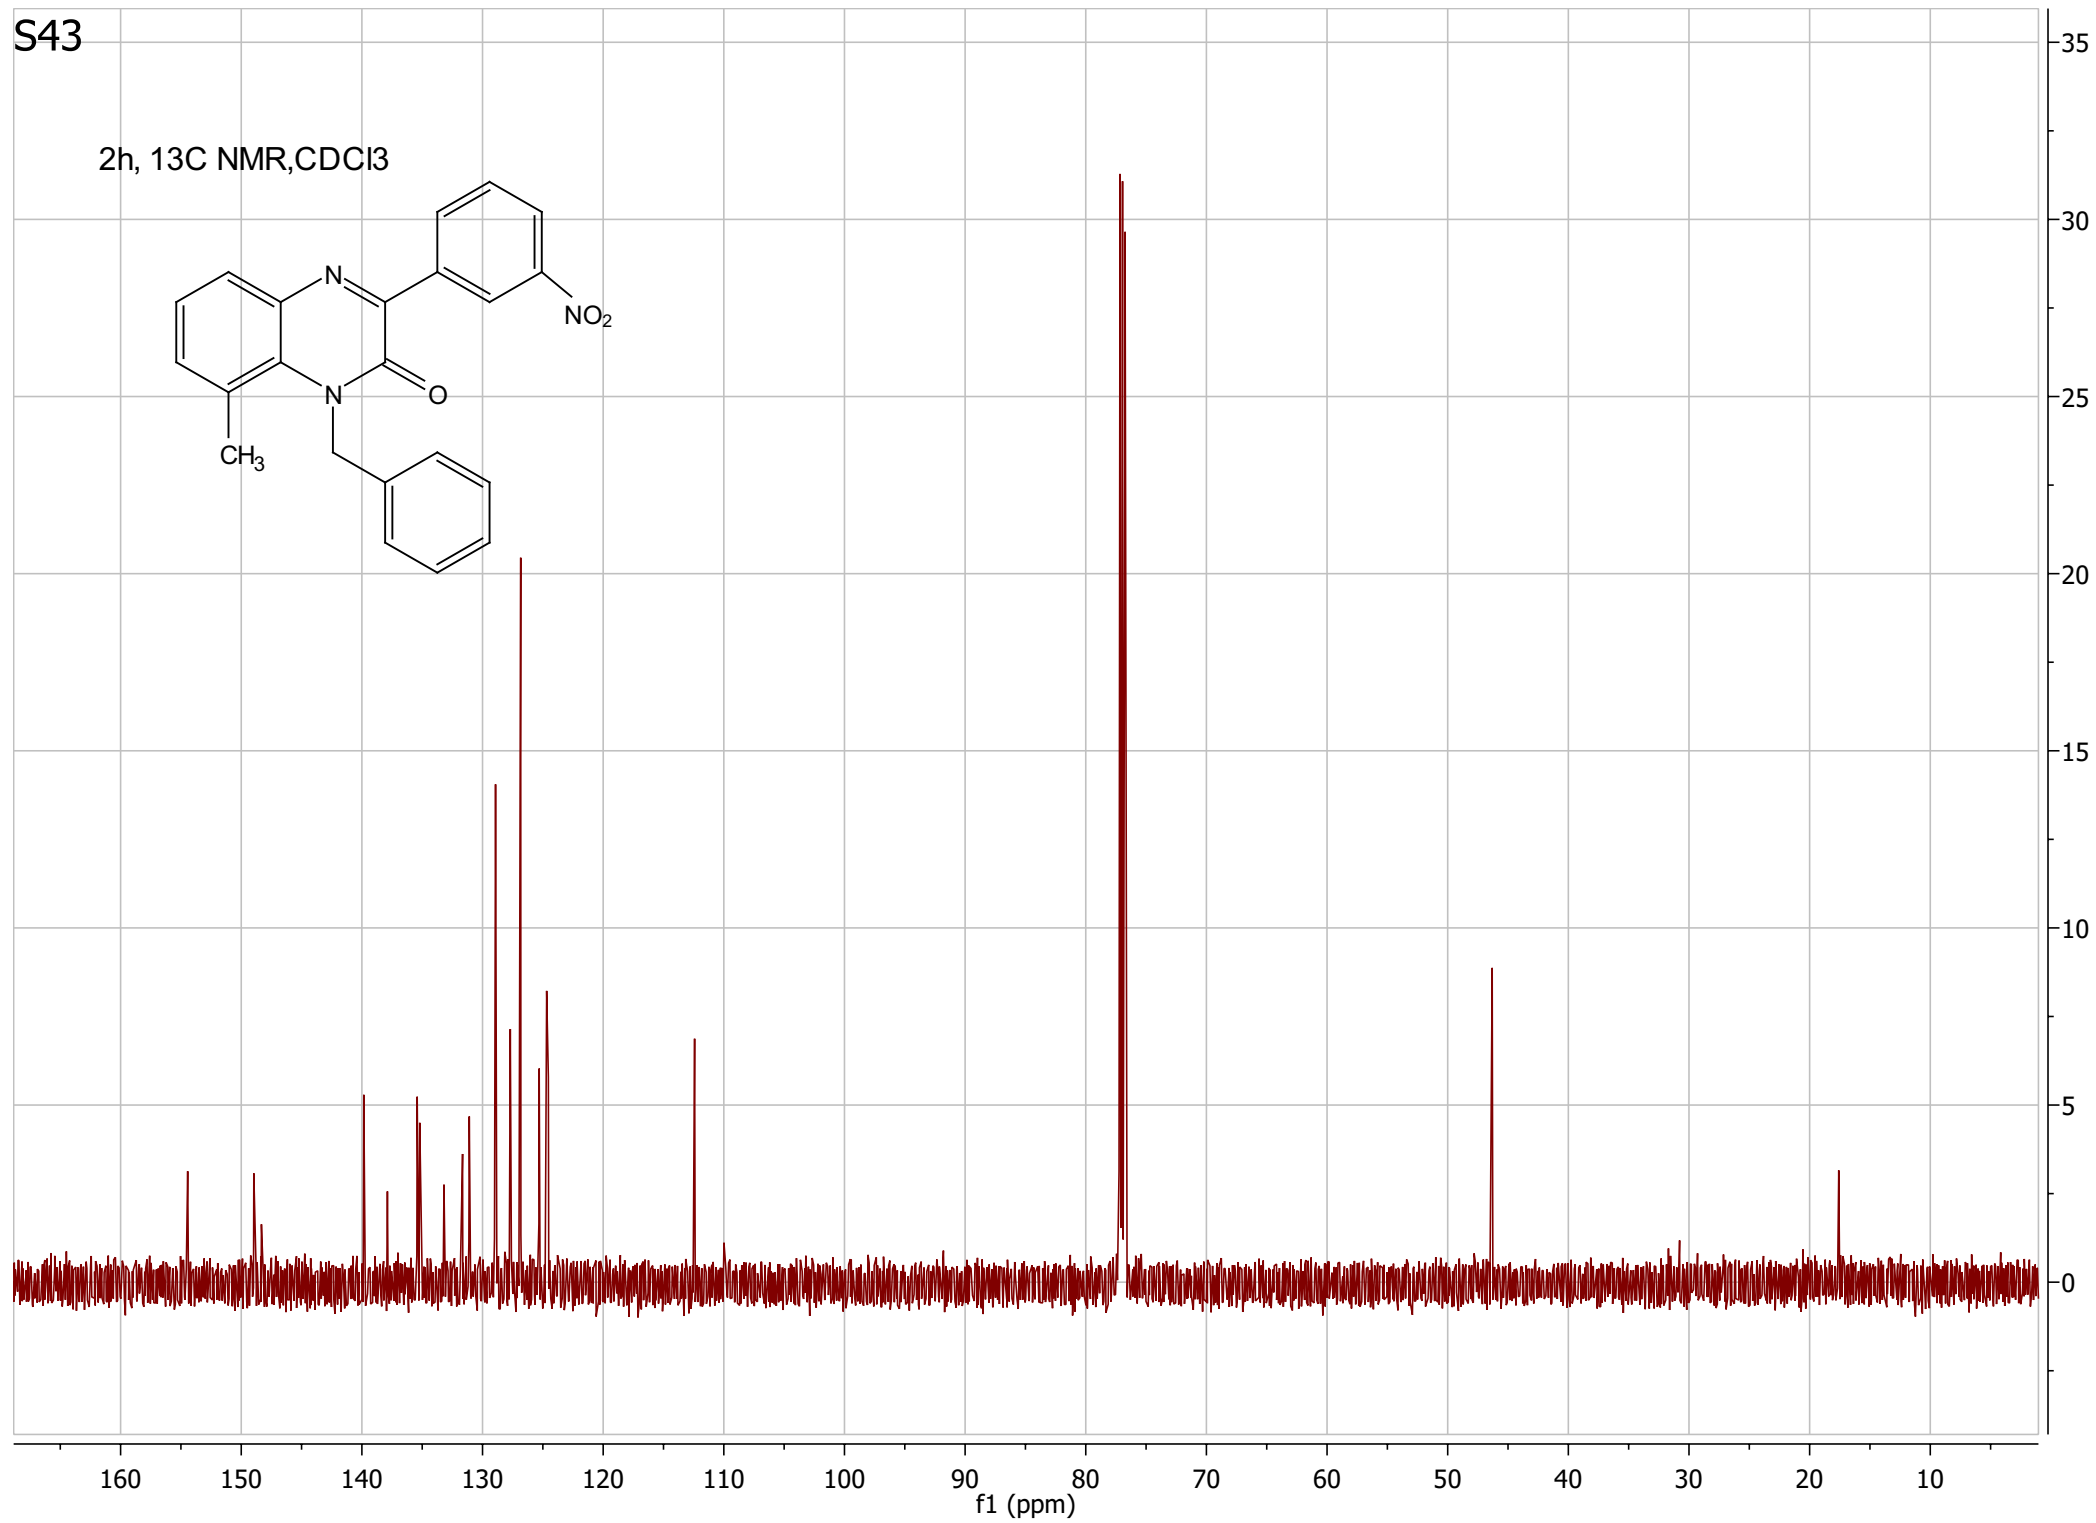

S44

2i, 1H NMR, CDCl3

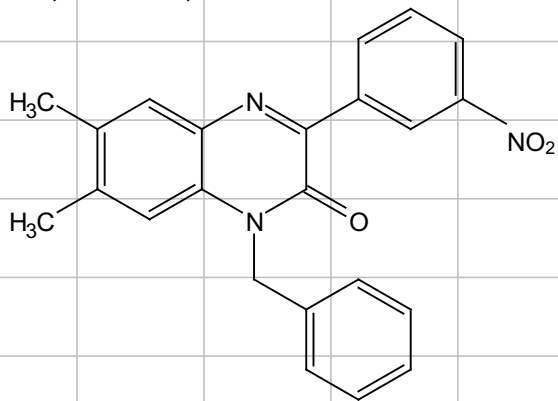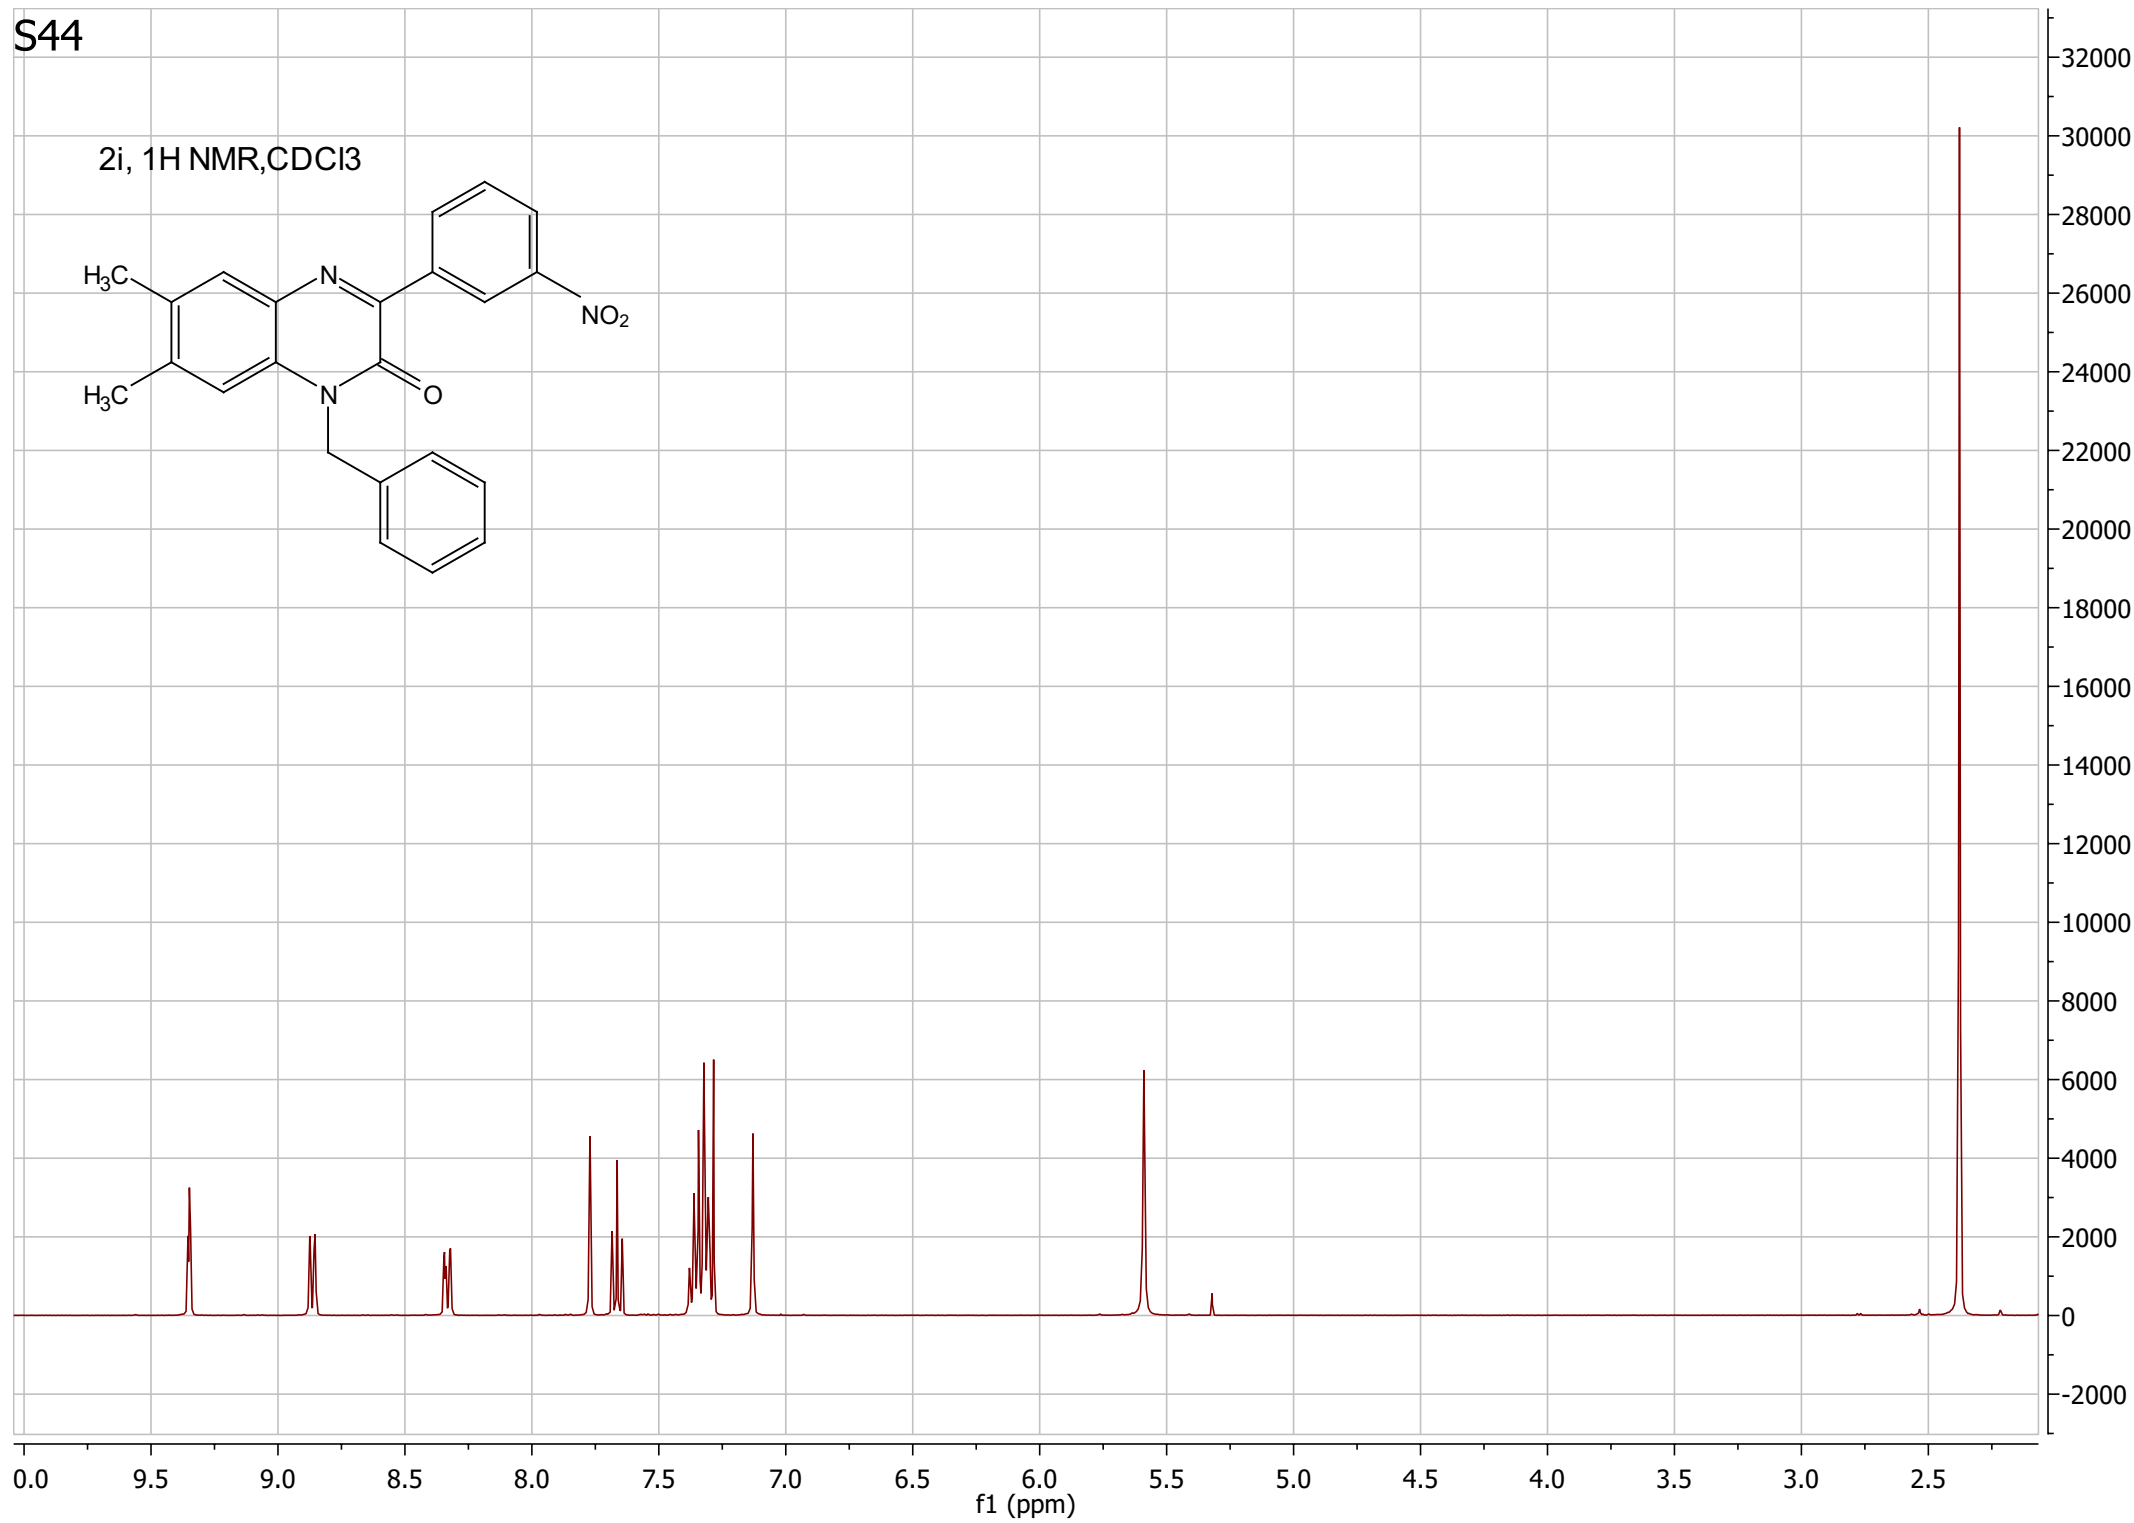



S46

3a, <sup>1</sup>H NMR, DMSO-d<sub>6</sub>

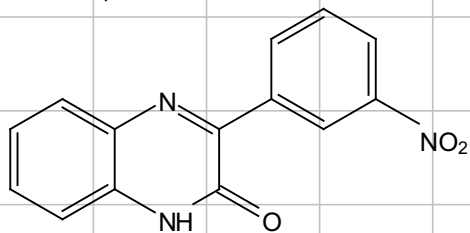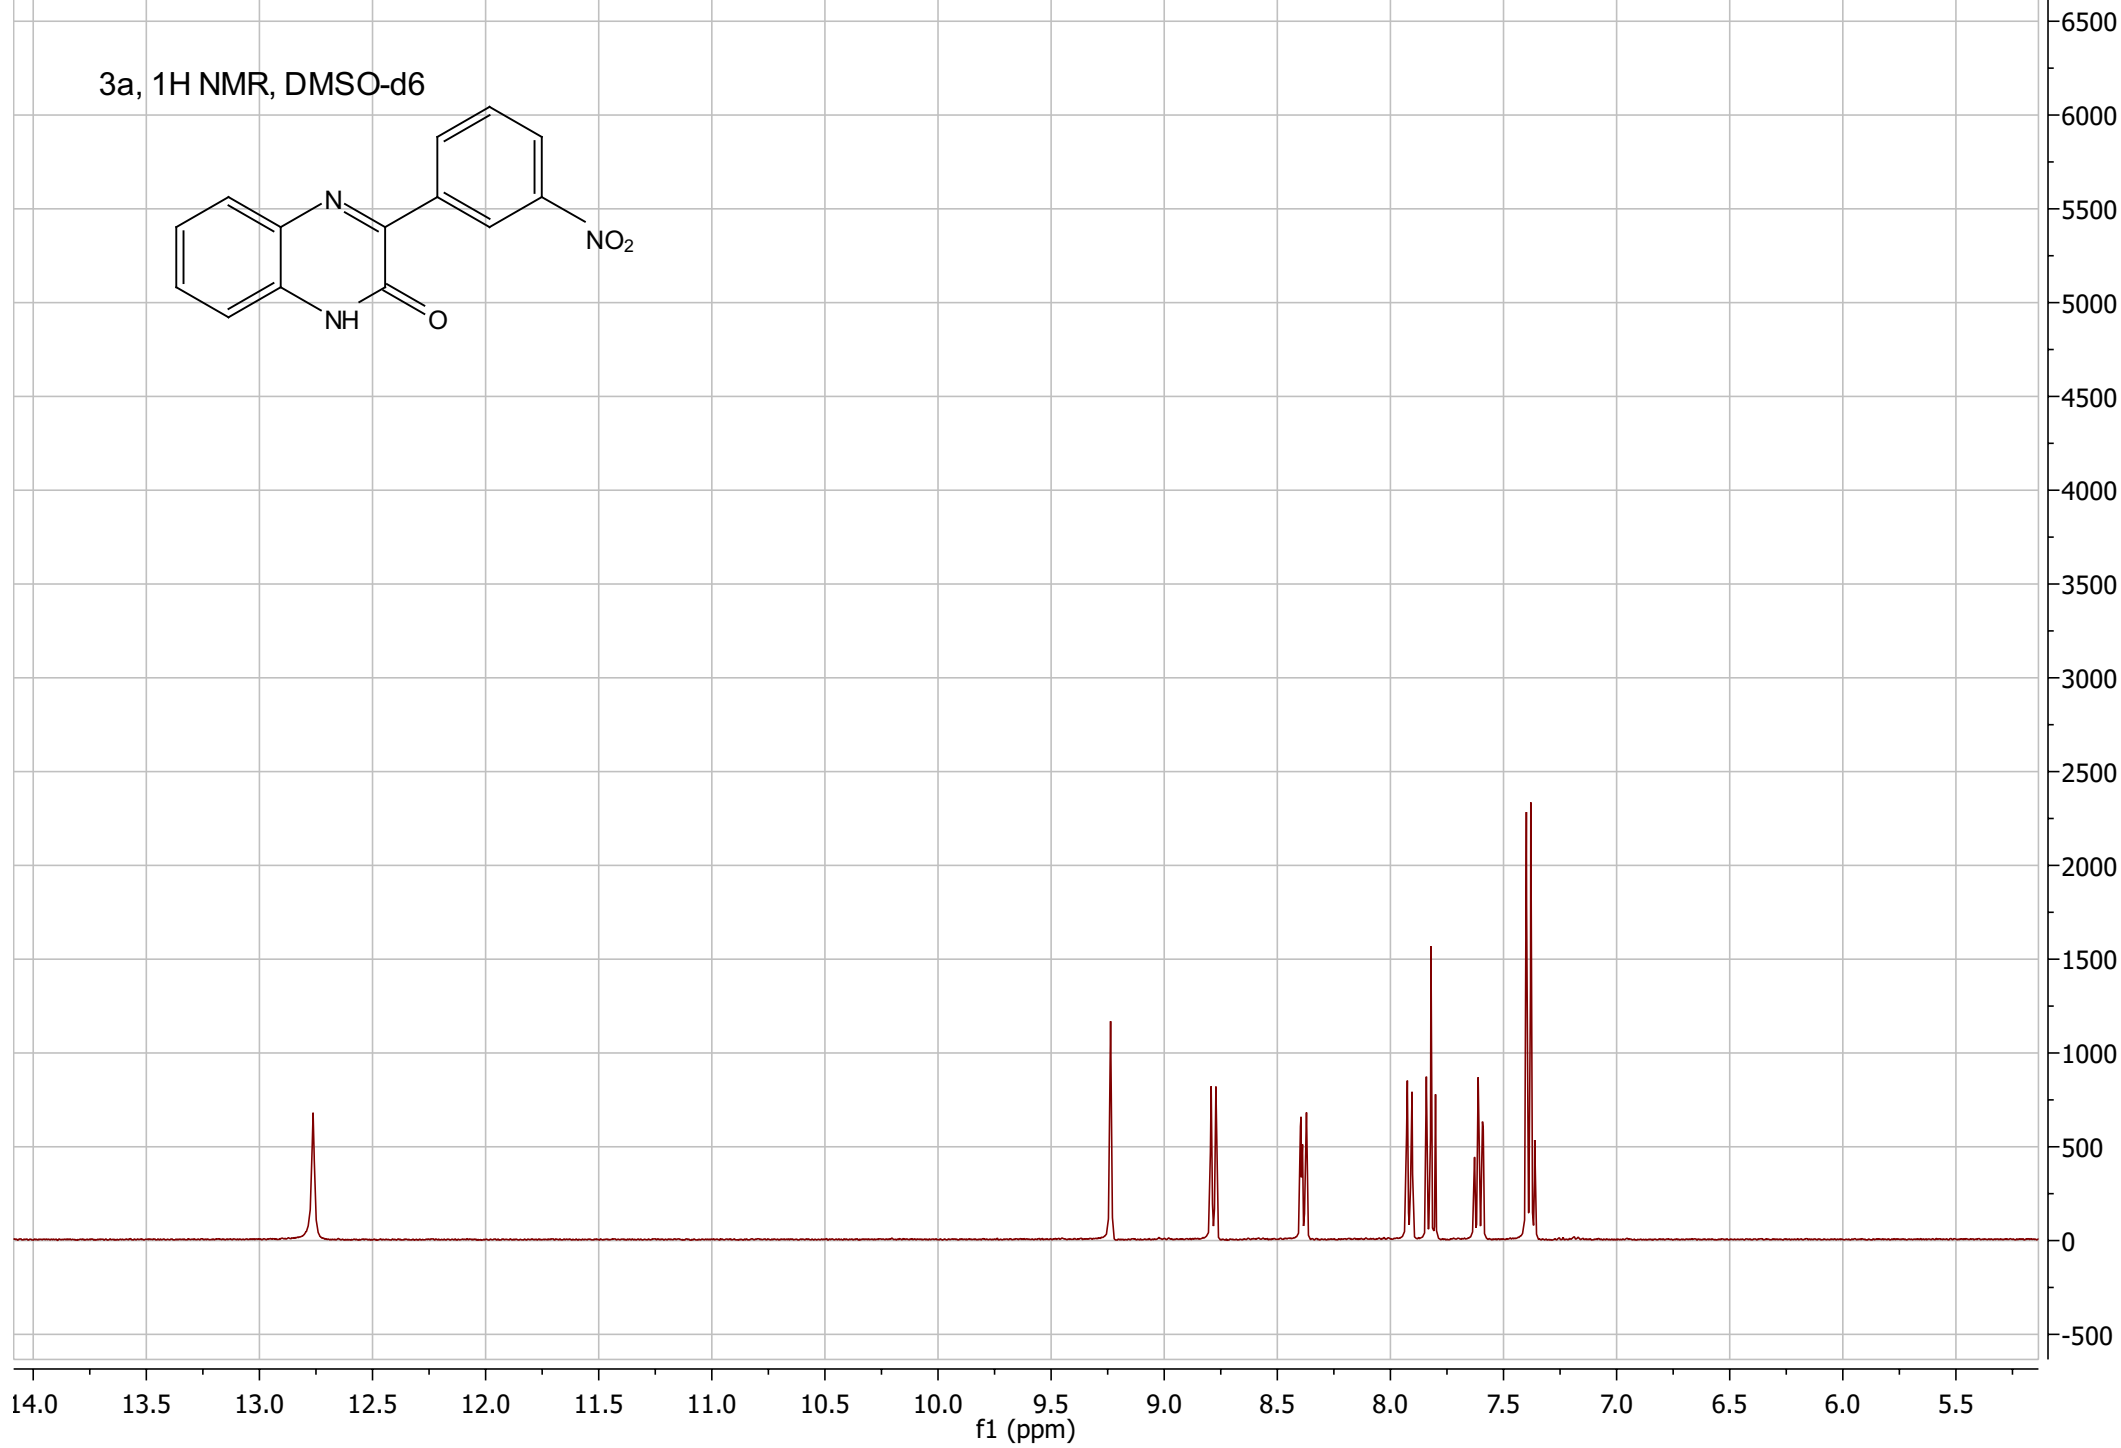

S47

3a, <sup>13</sup>C NMR, DMSO-d<sub>6</sub>

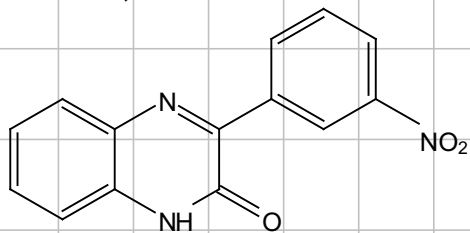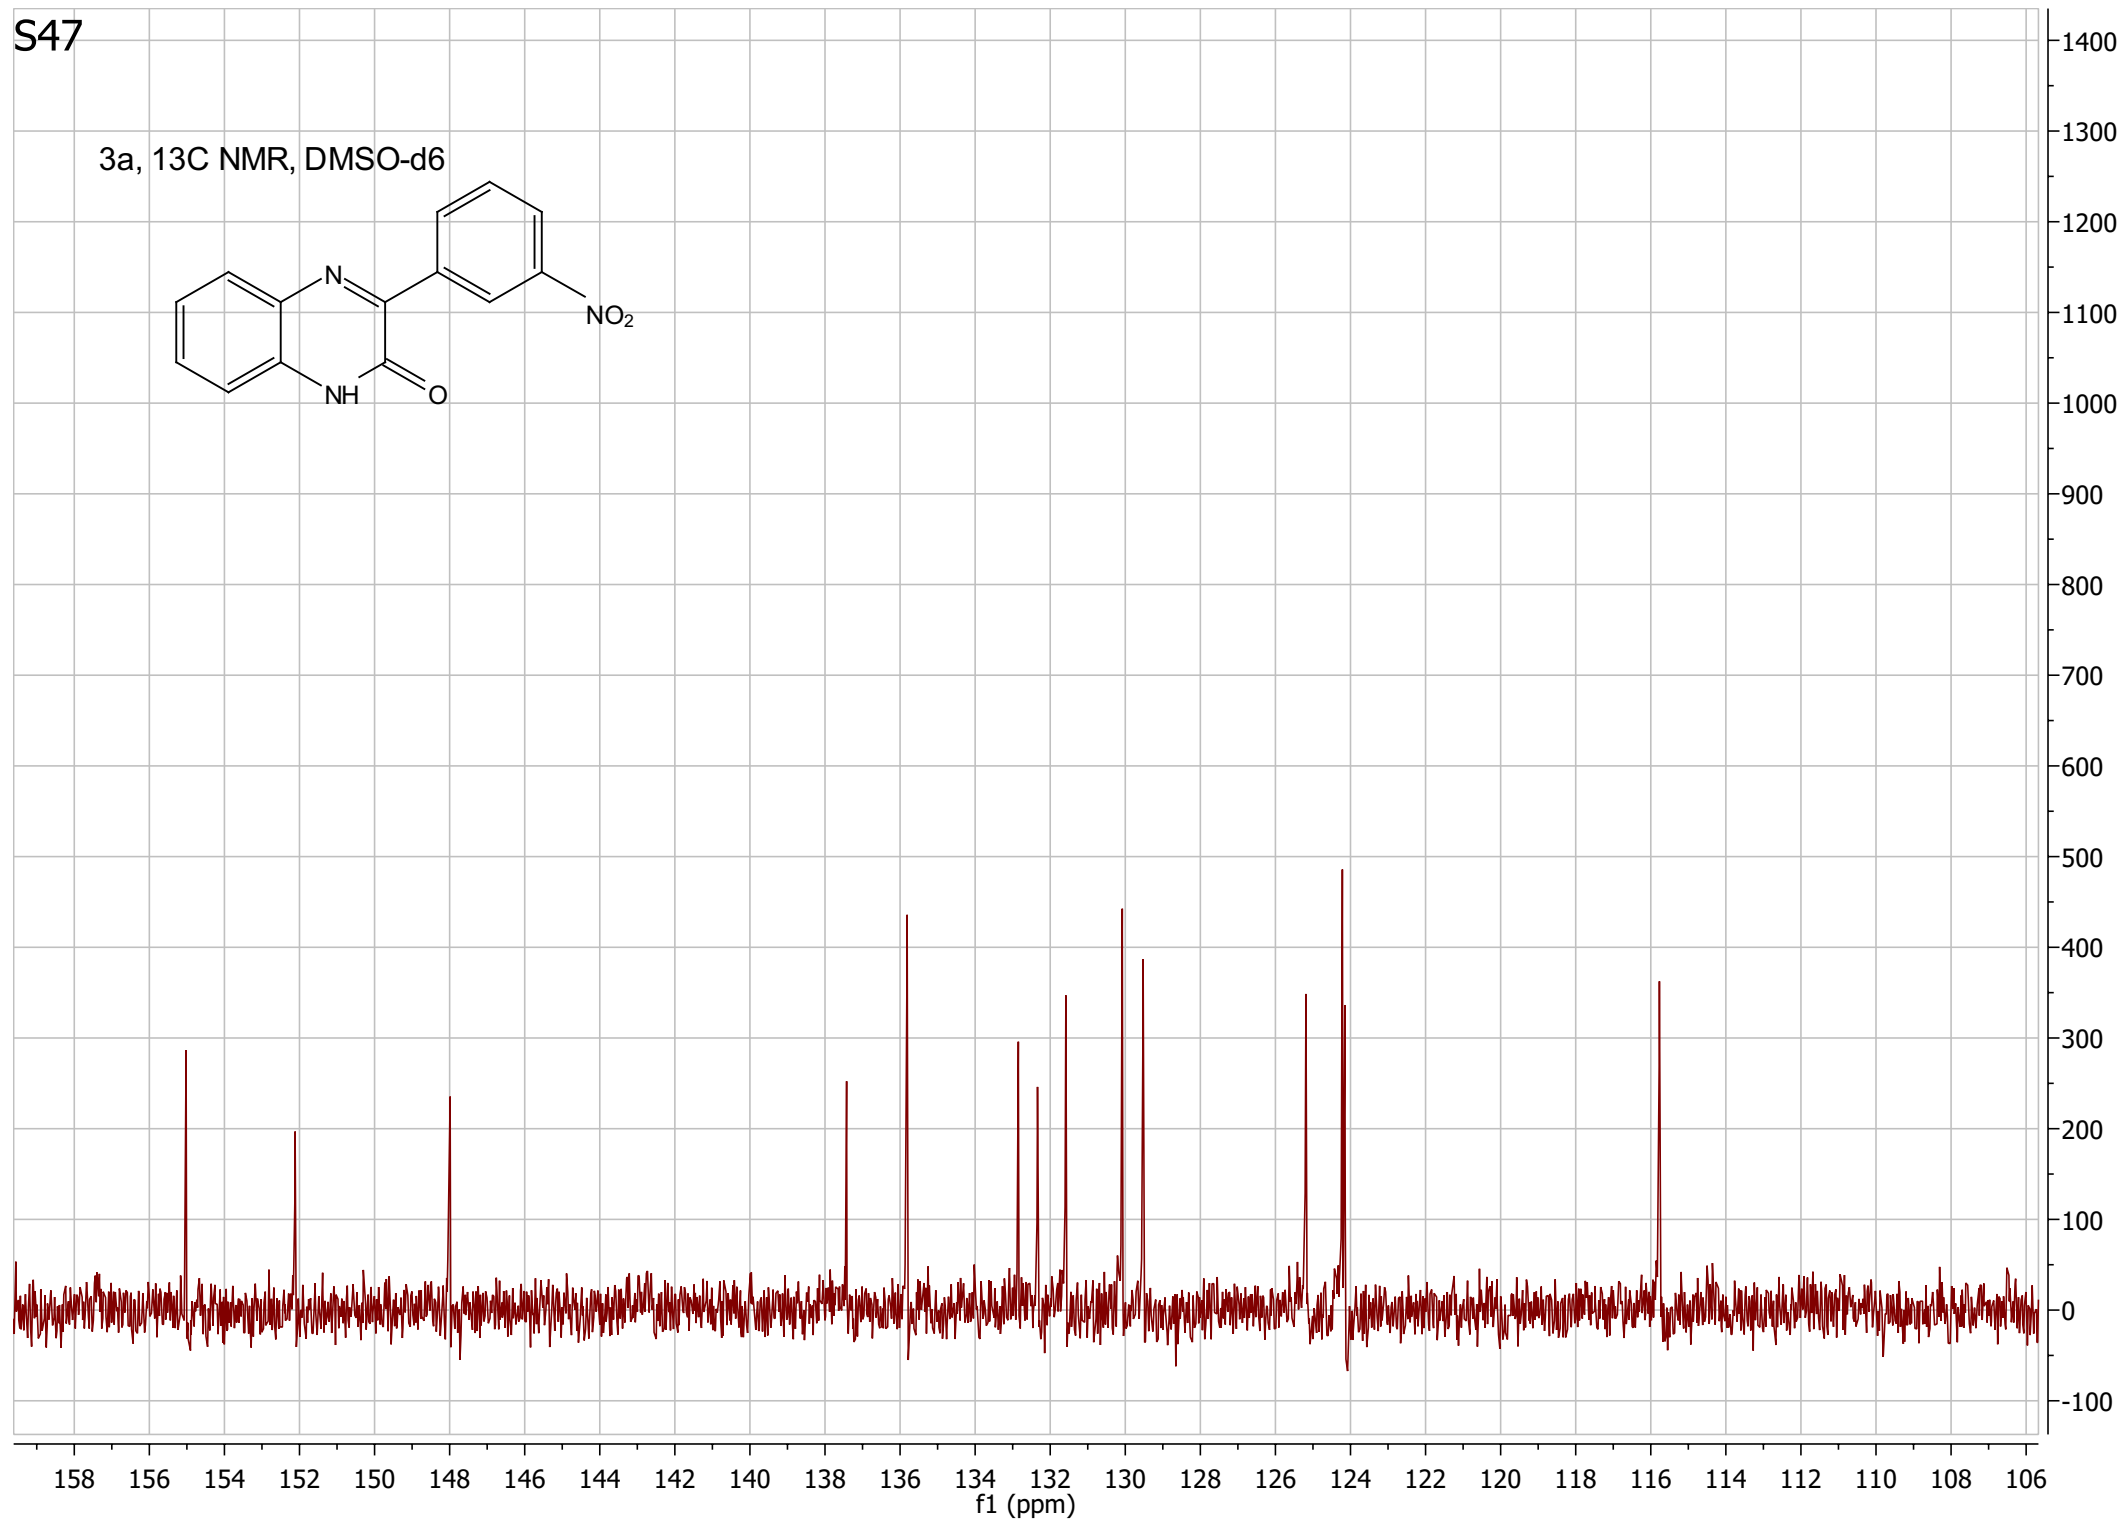

S48

3b, <sup>1</sup>H NMR, CDCl<sub>3</sub>

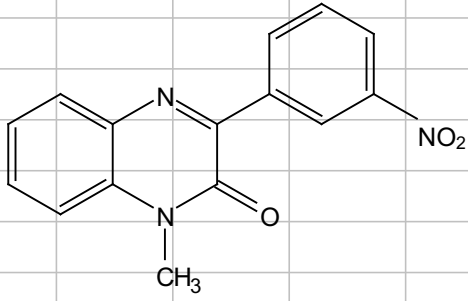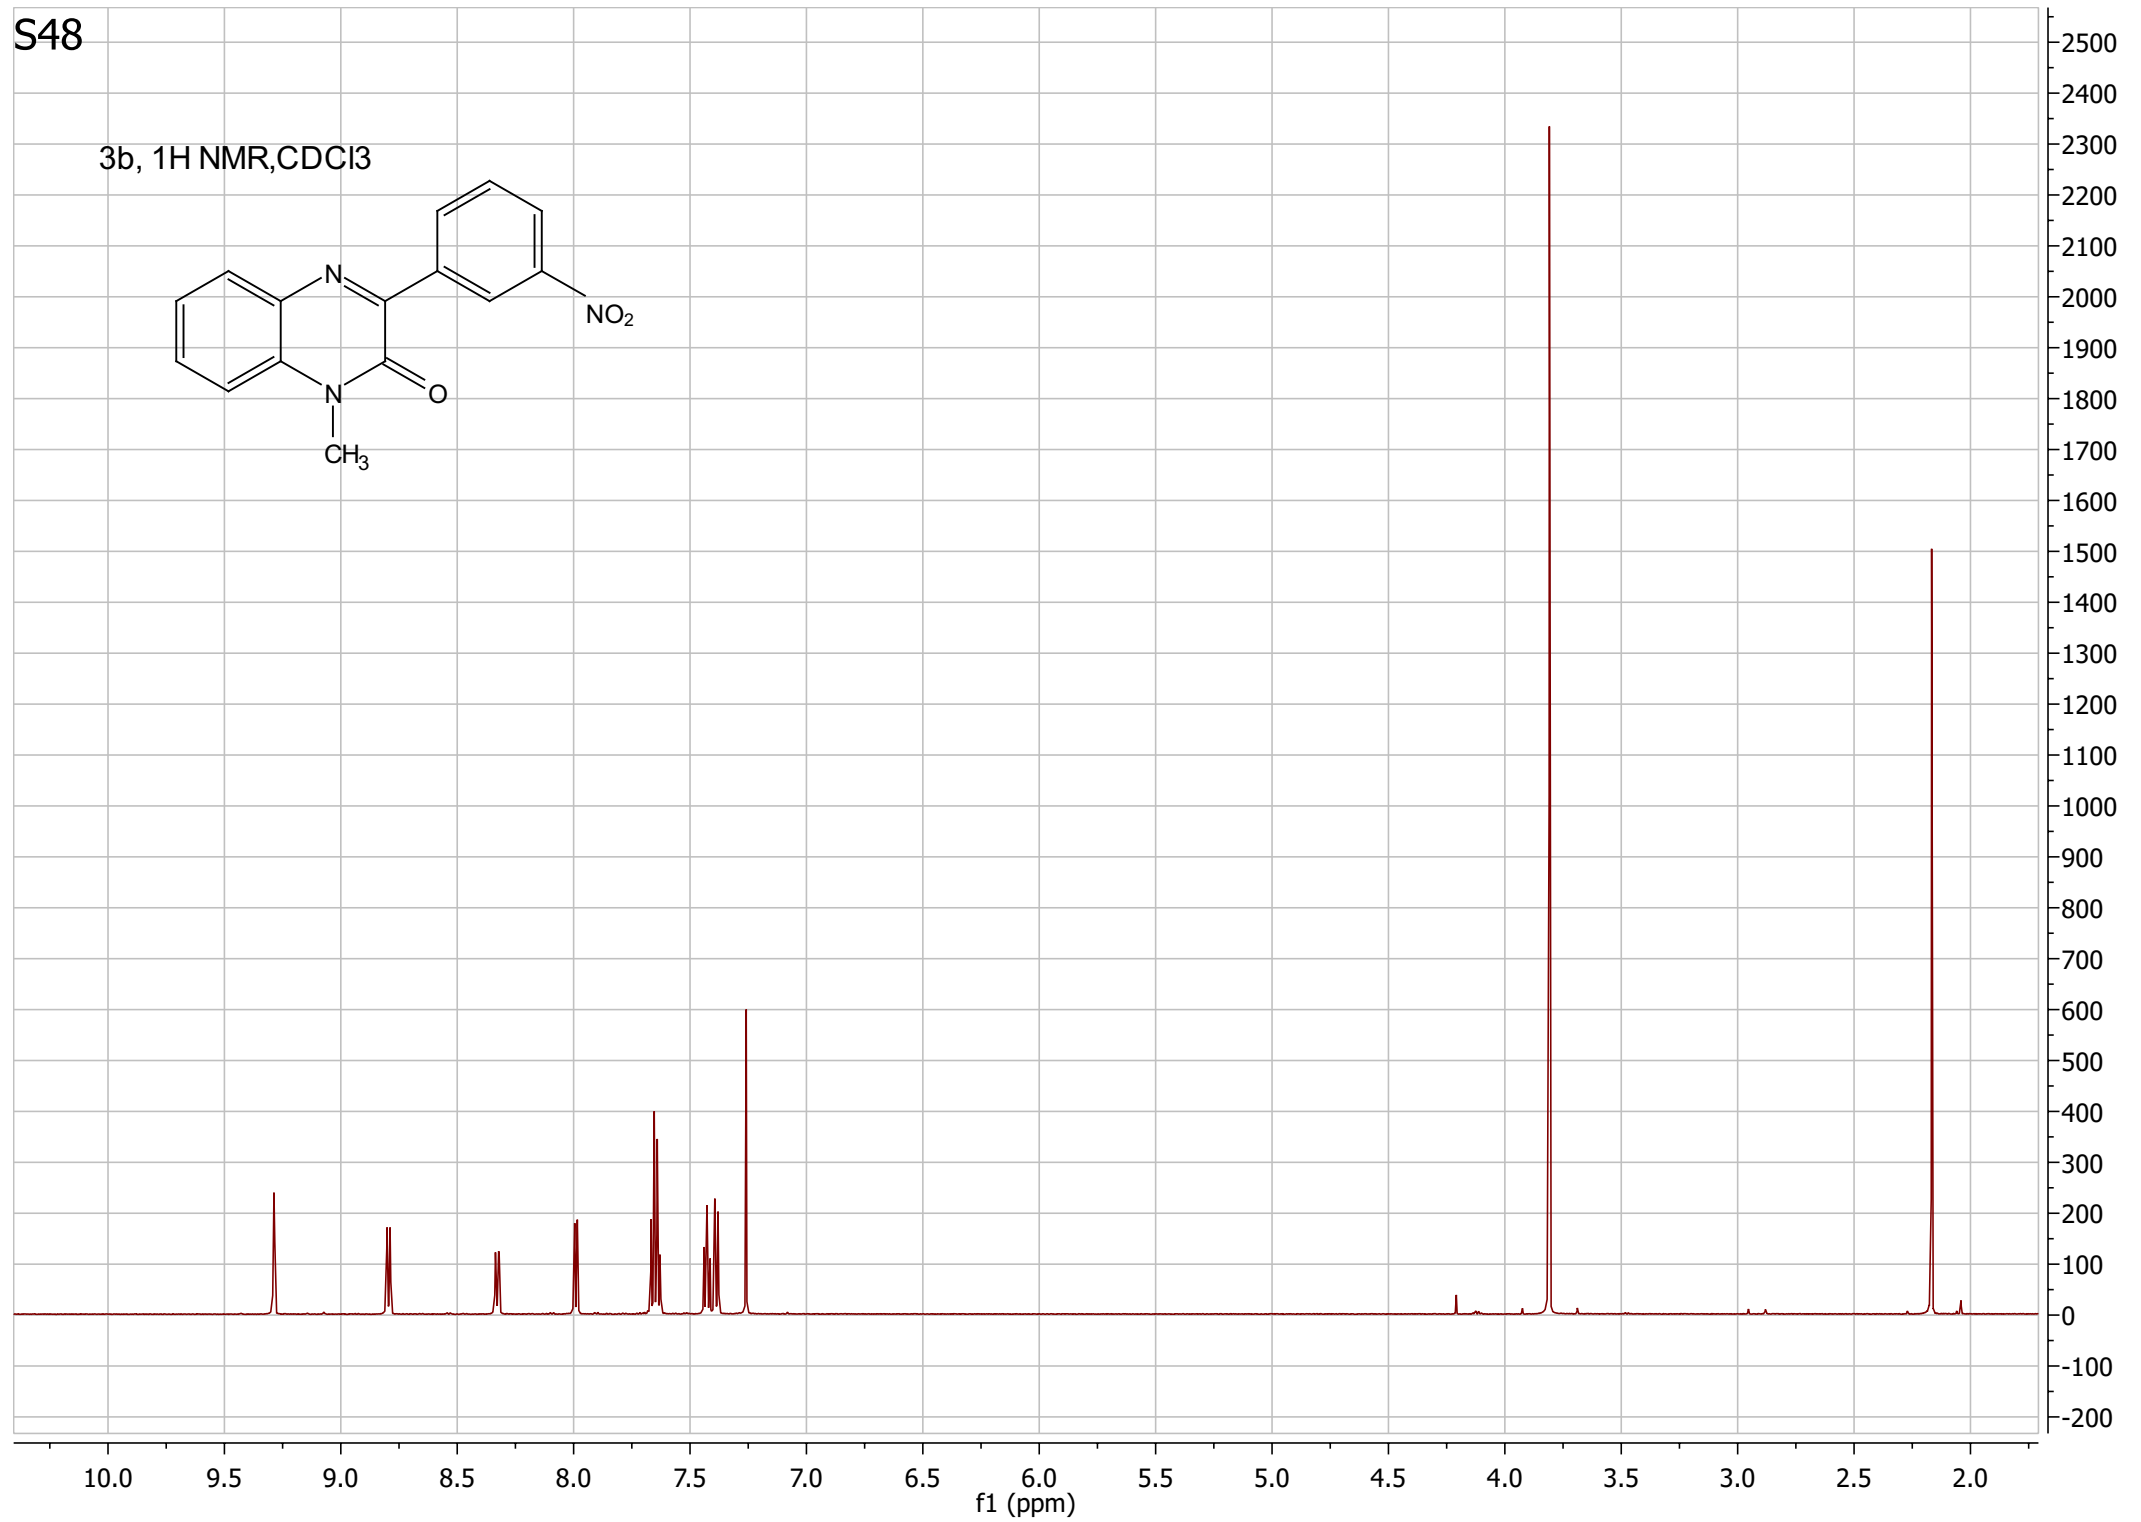



S49

3b, <sup>13</sup>C NMR, CDCl<sub>3</sub>

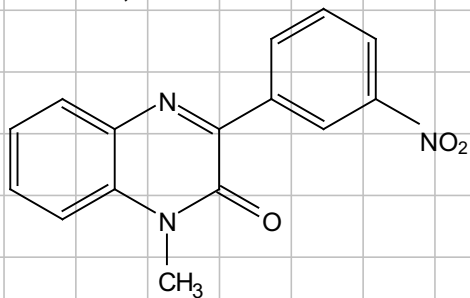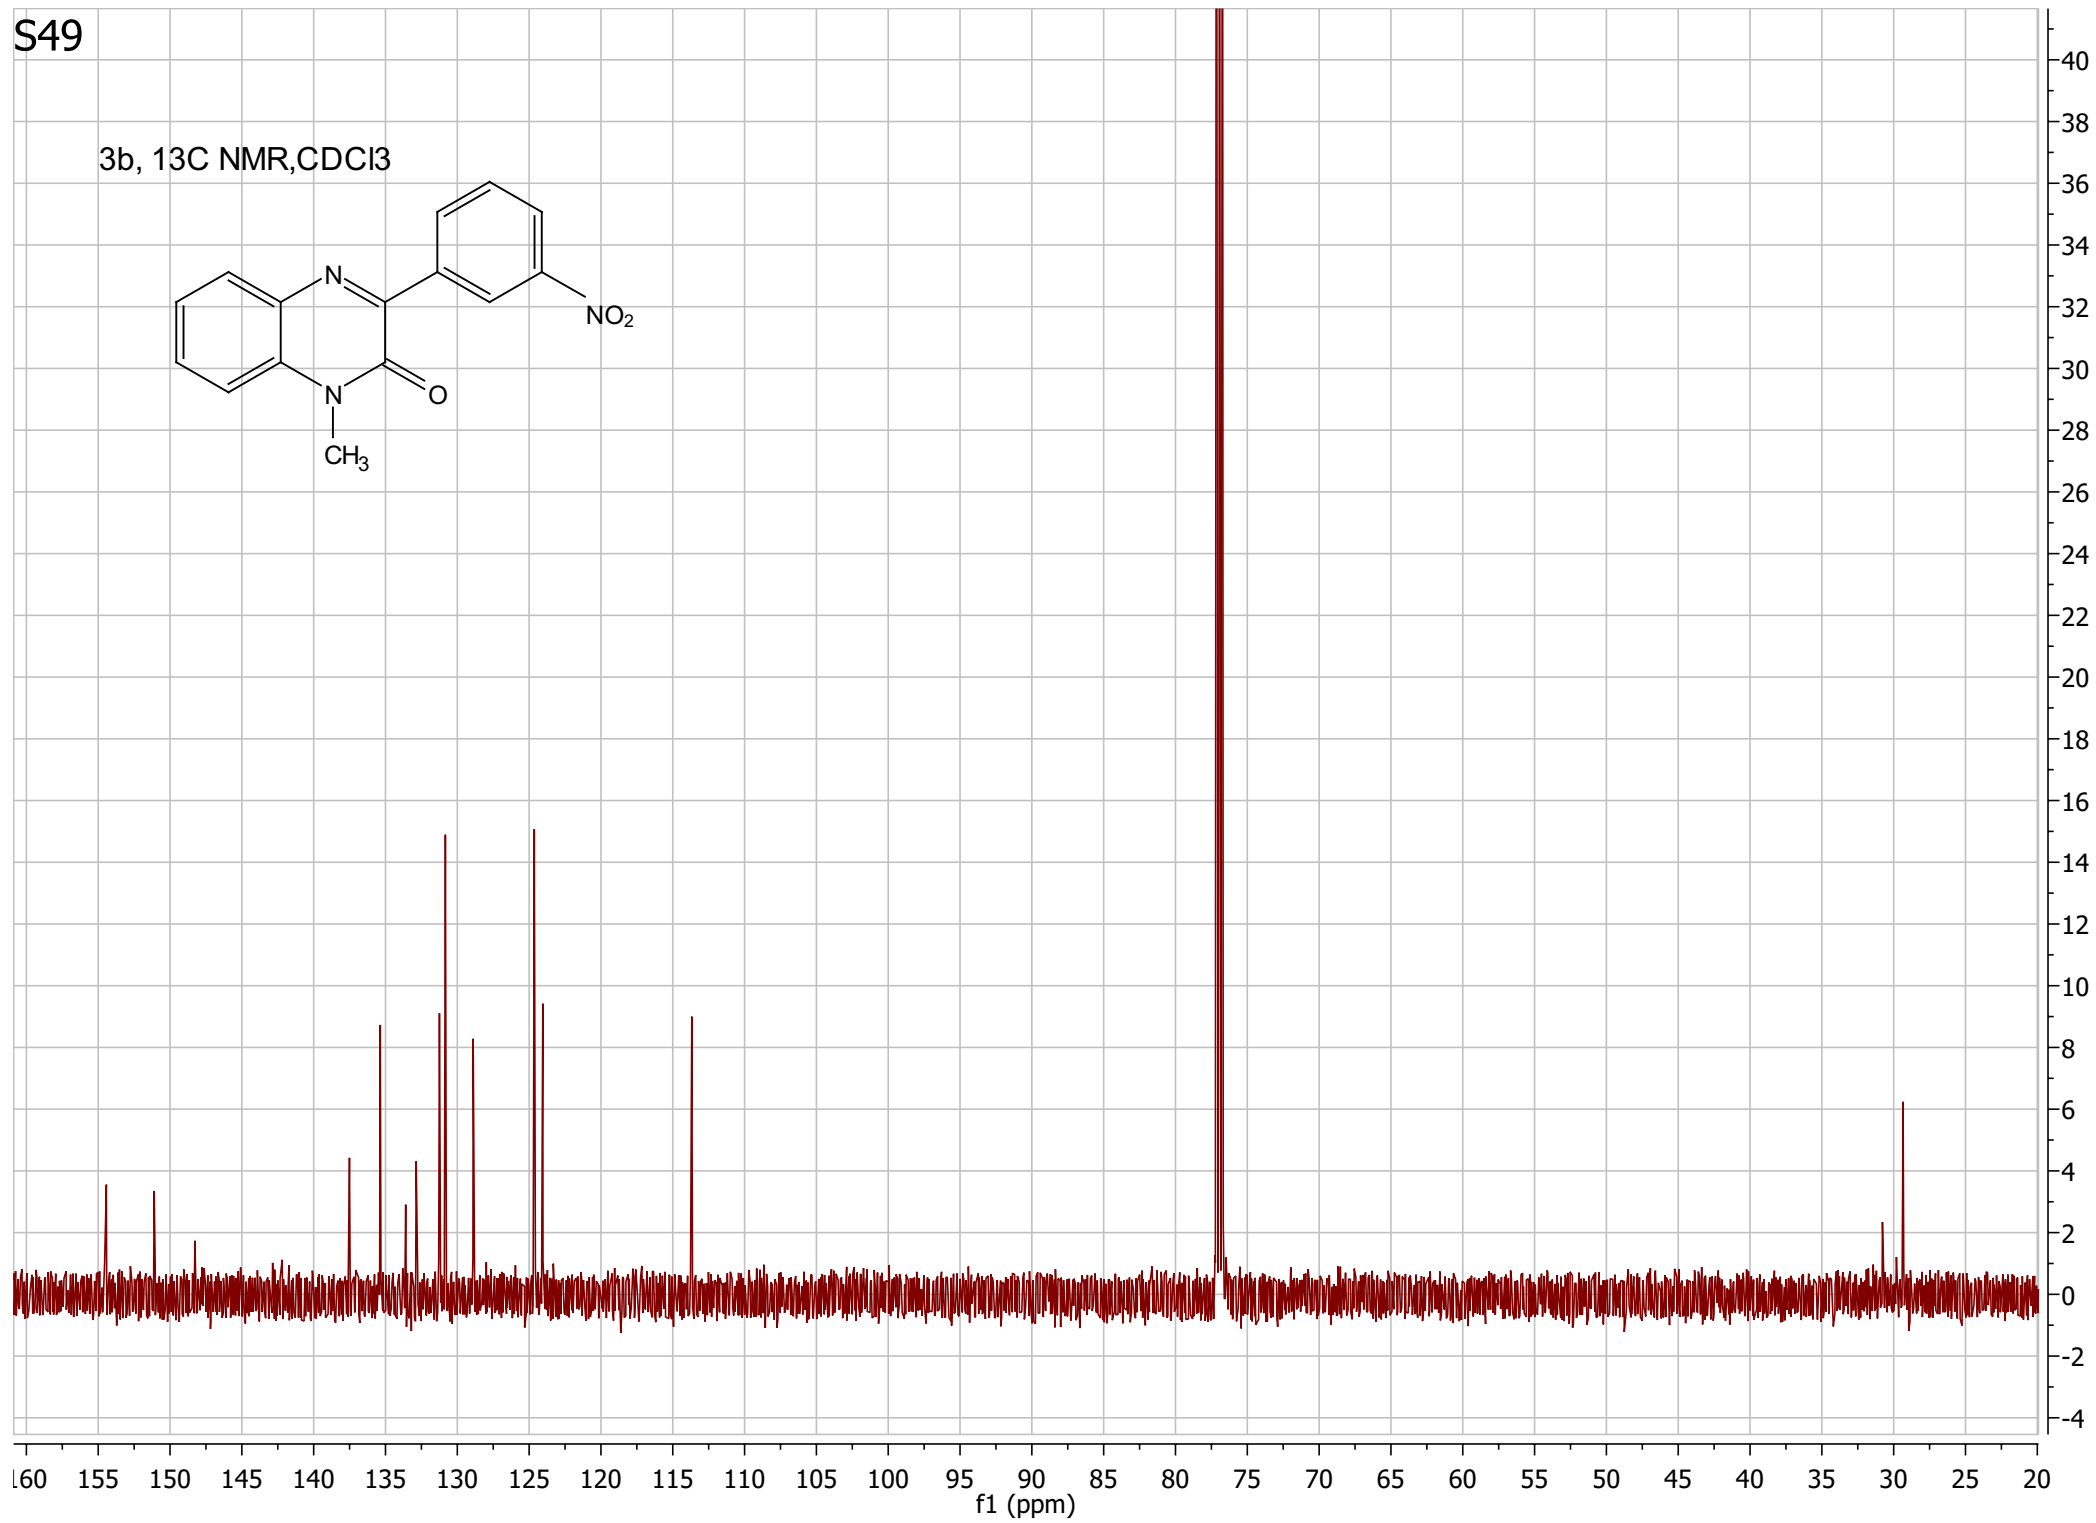

S50

3c, 1H NMR, CDCl3

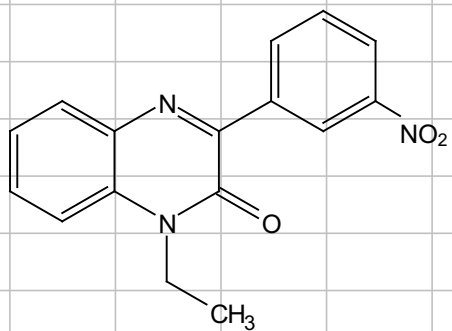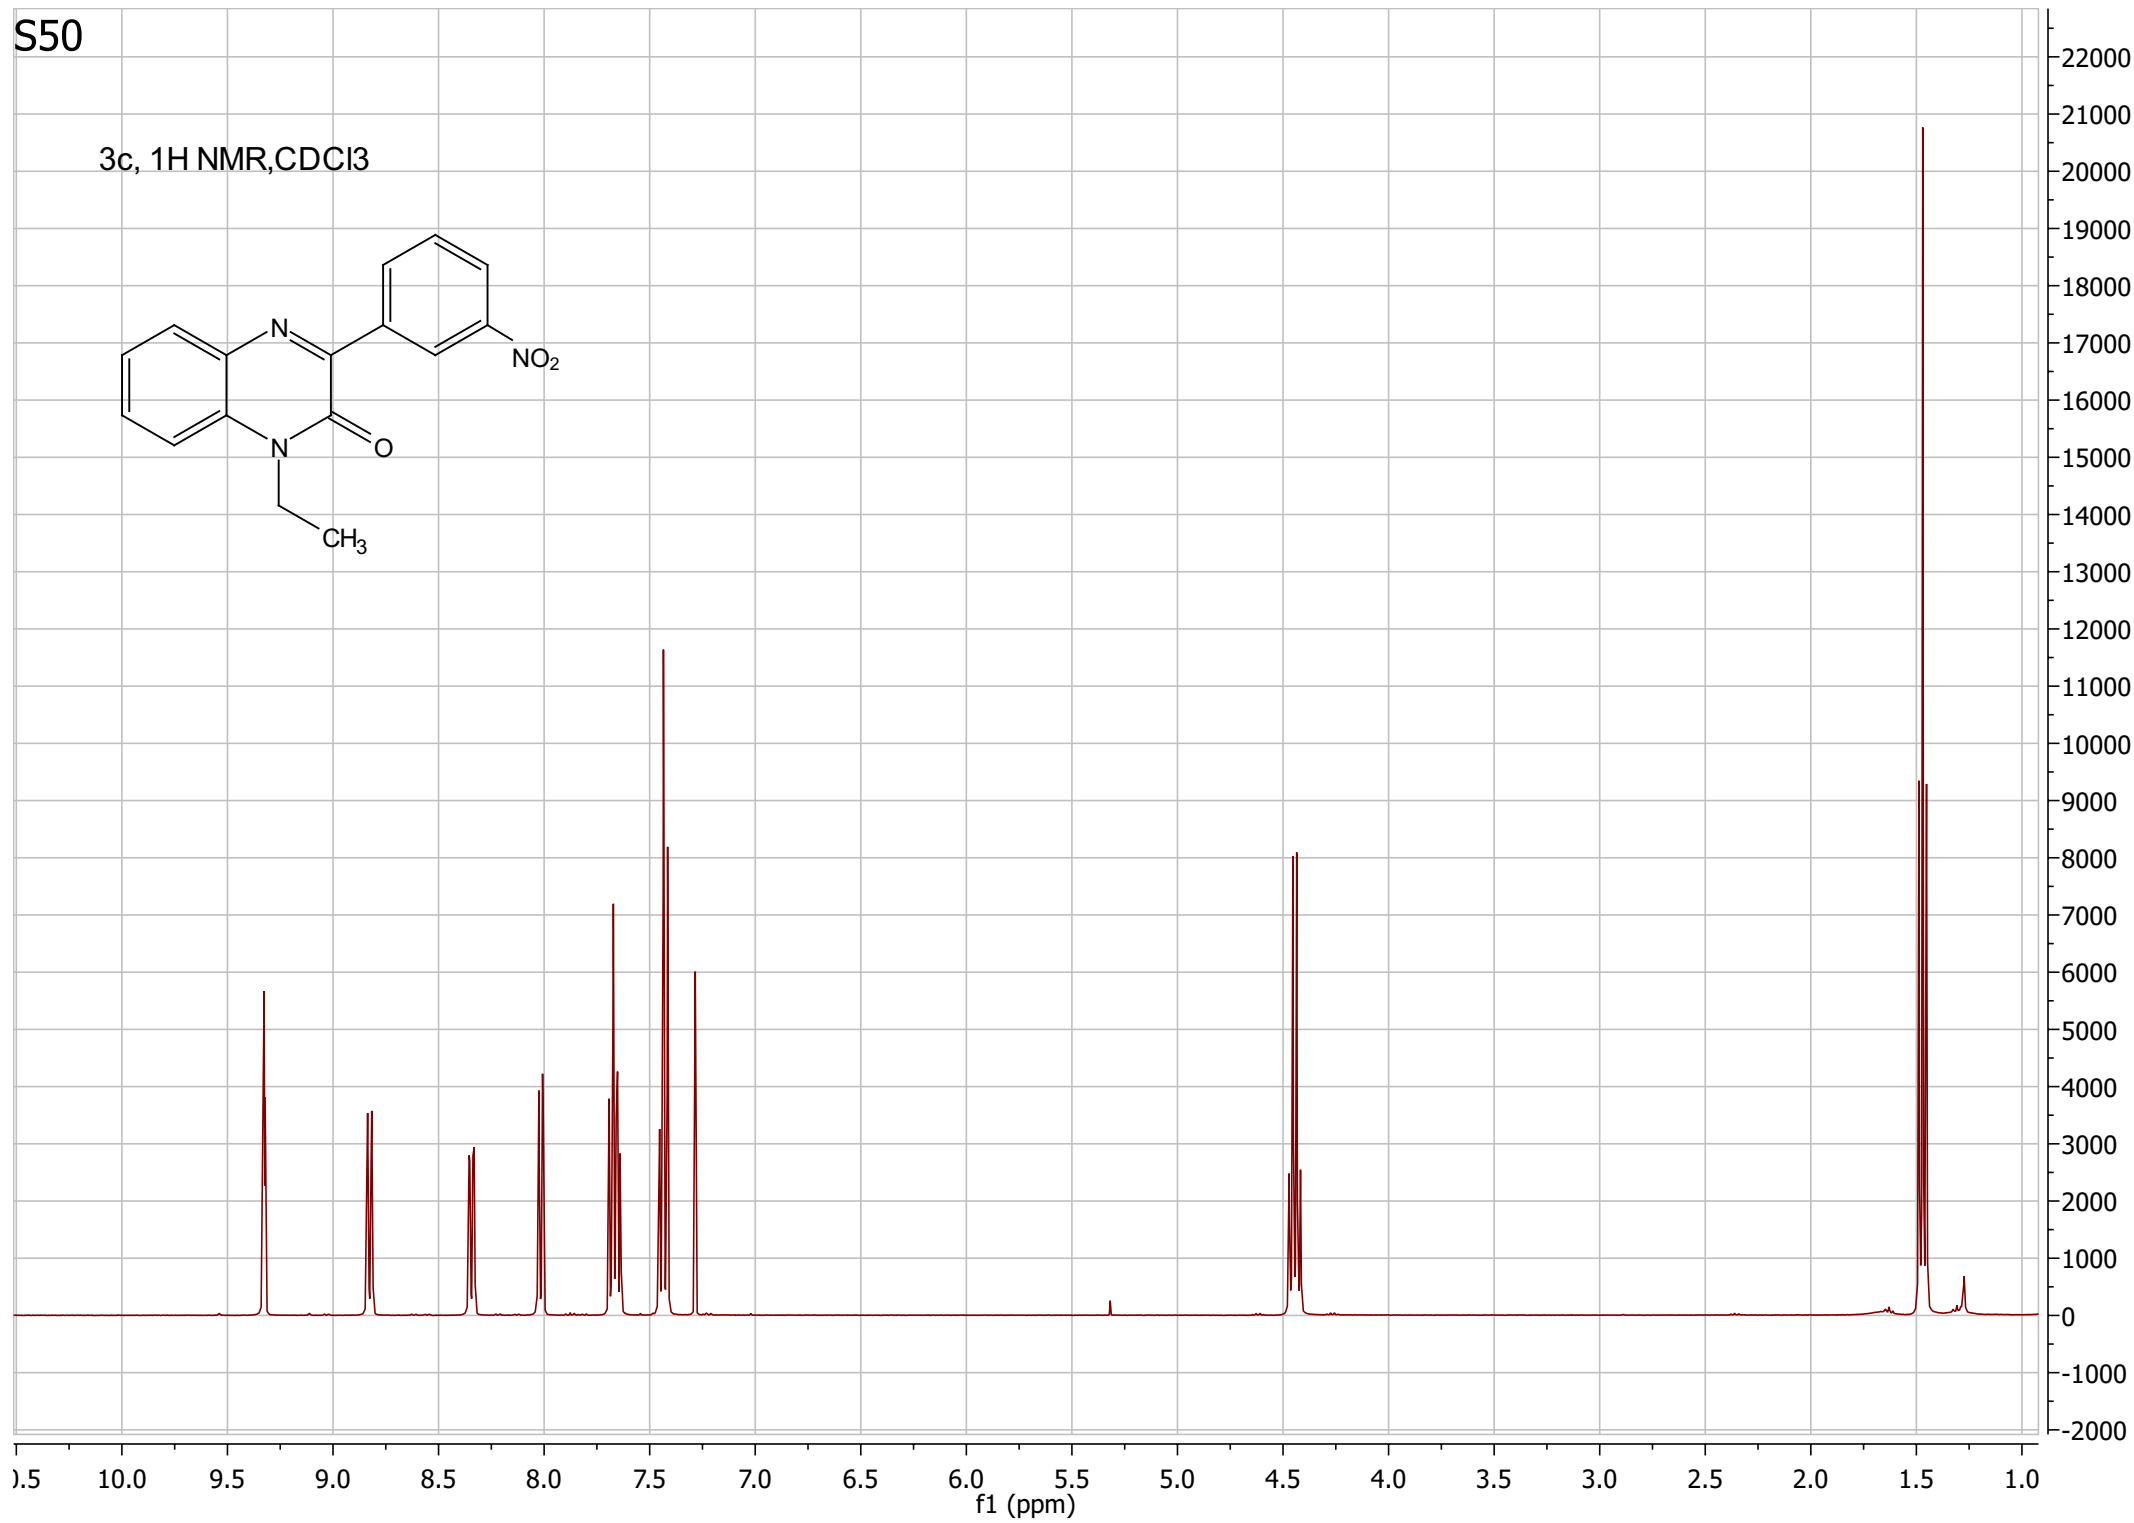

S51

3c, <sup>13</sup>C NMR, CDCl<sub>3</sub>

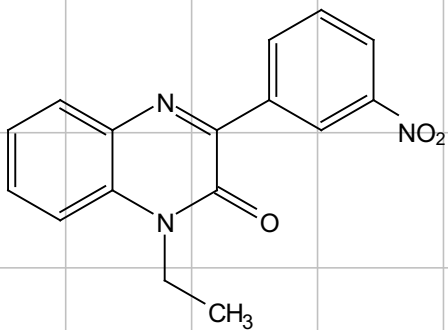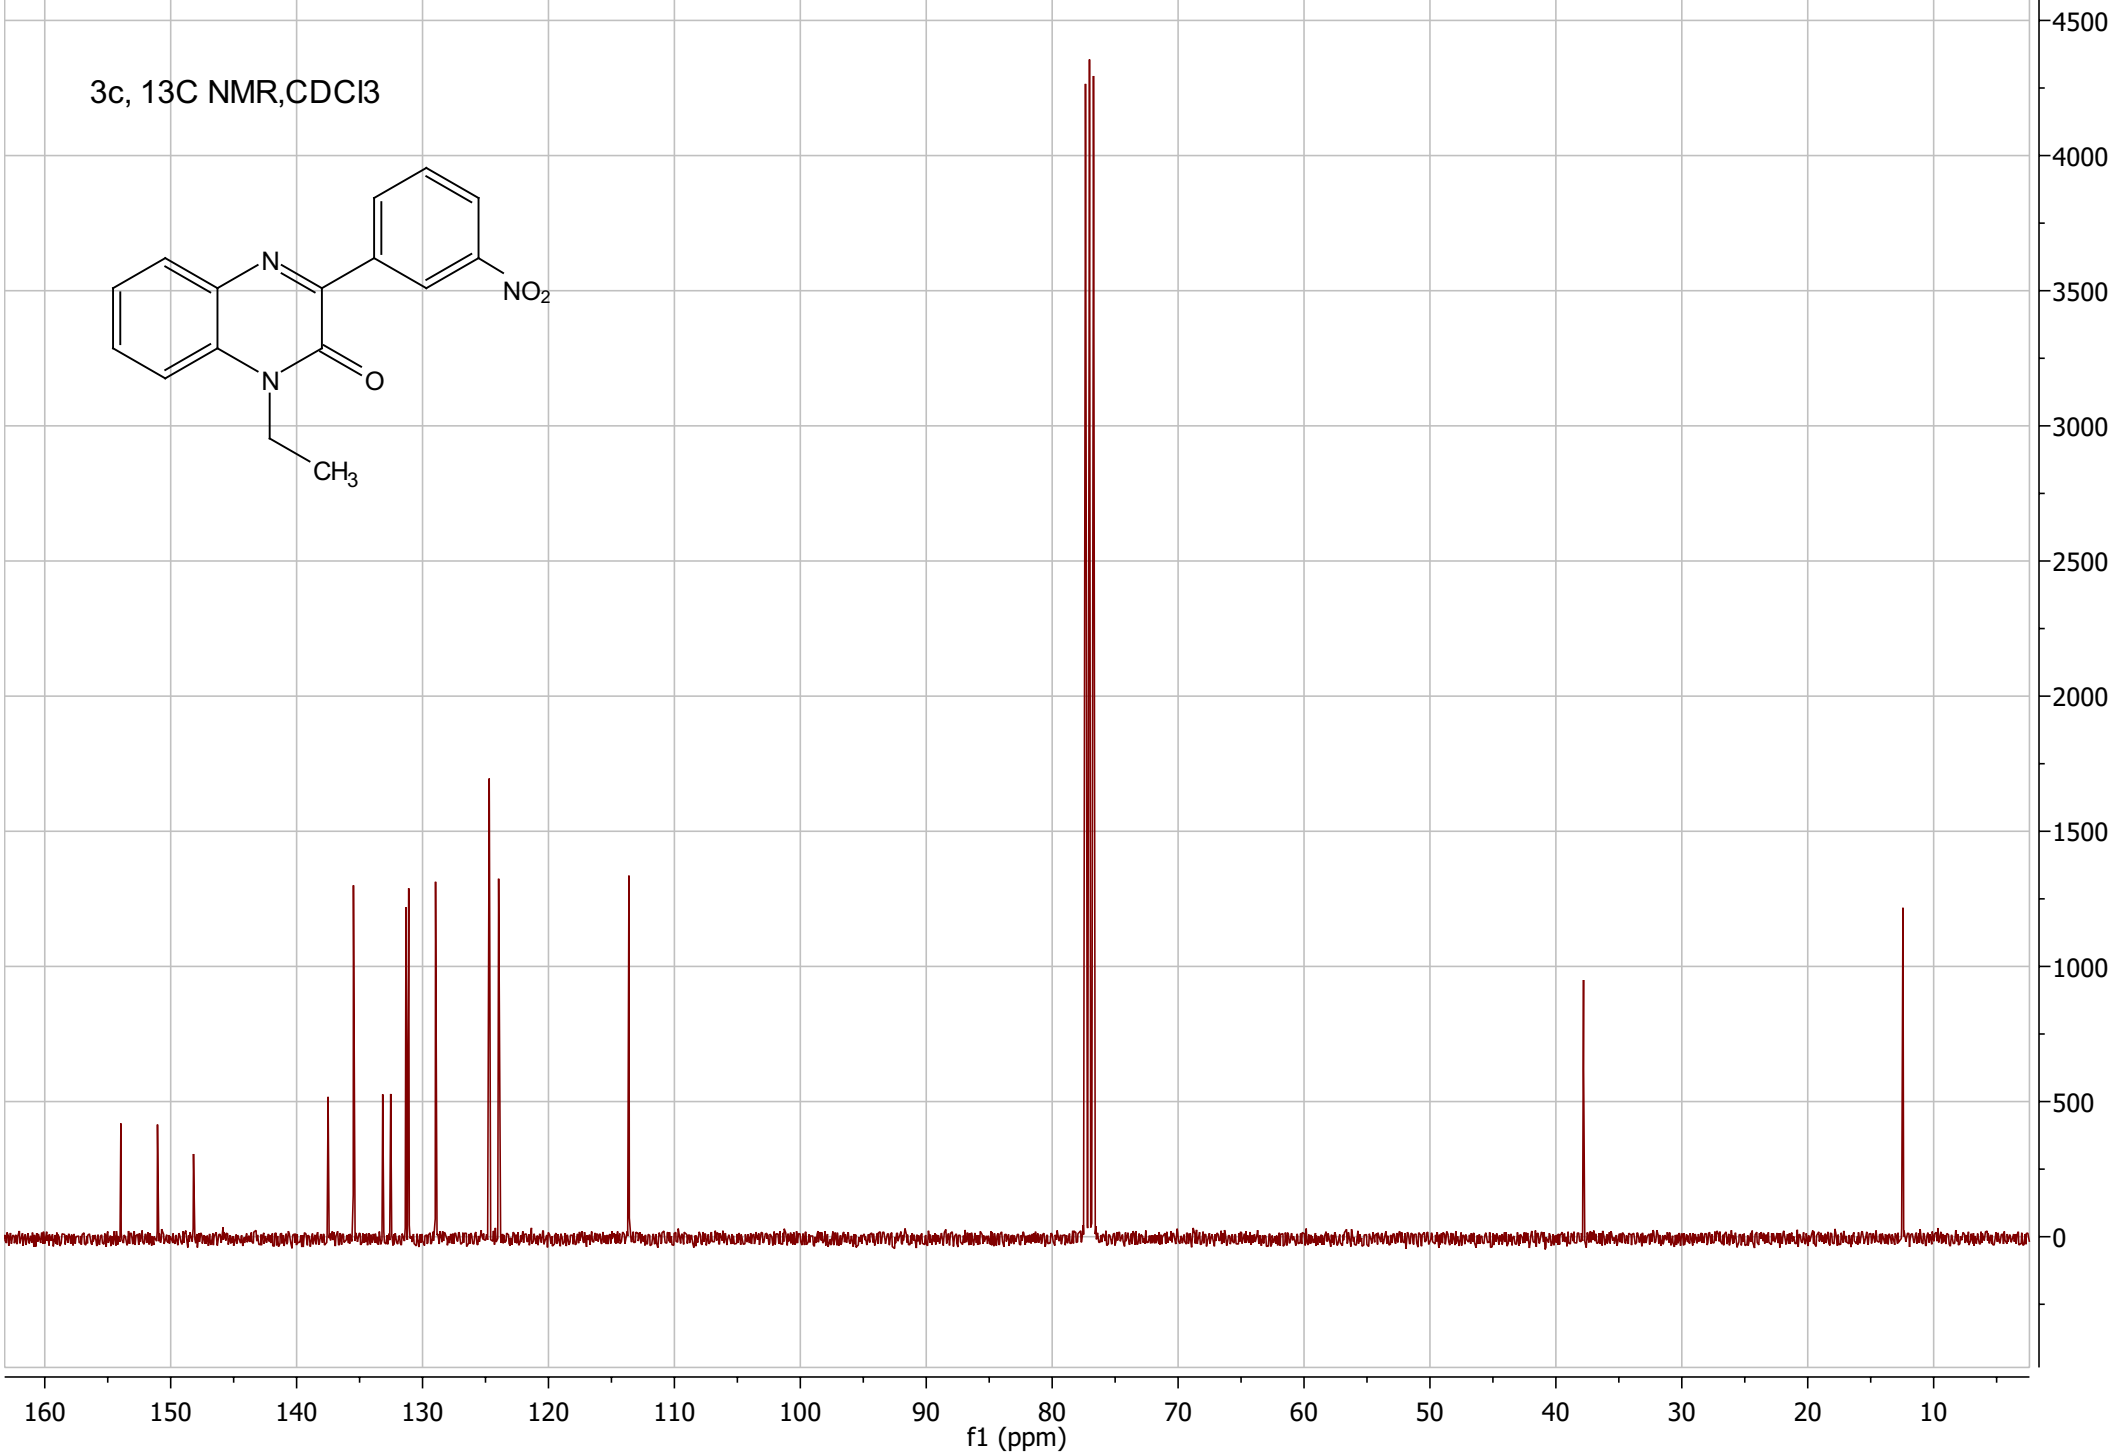

S52

3d, <sup>1</sup>H NMR, CDCl<sub>3</sub>

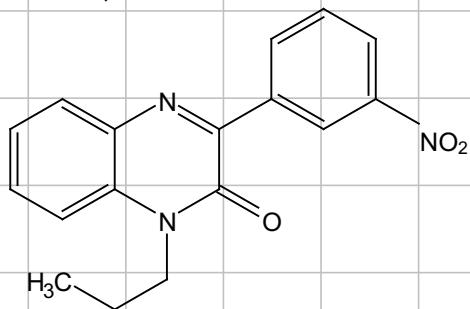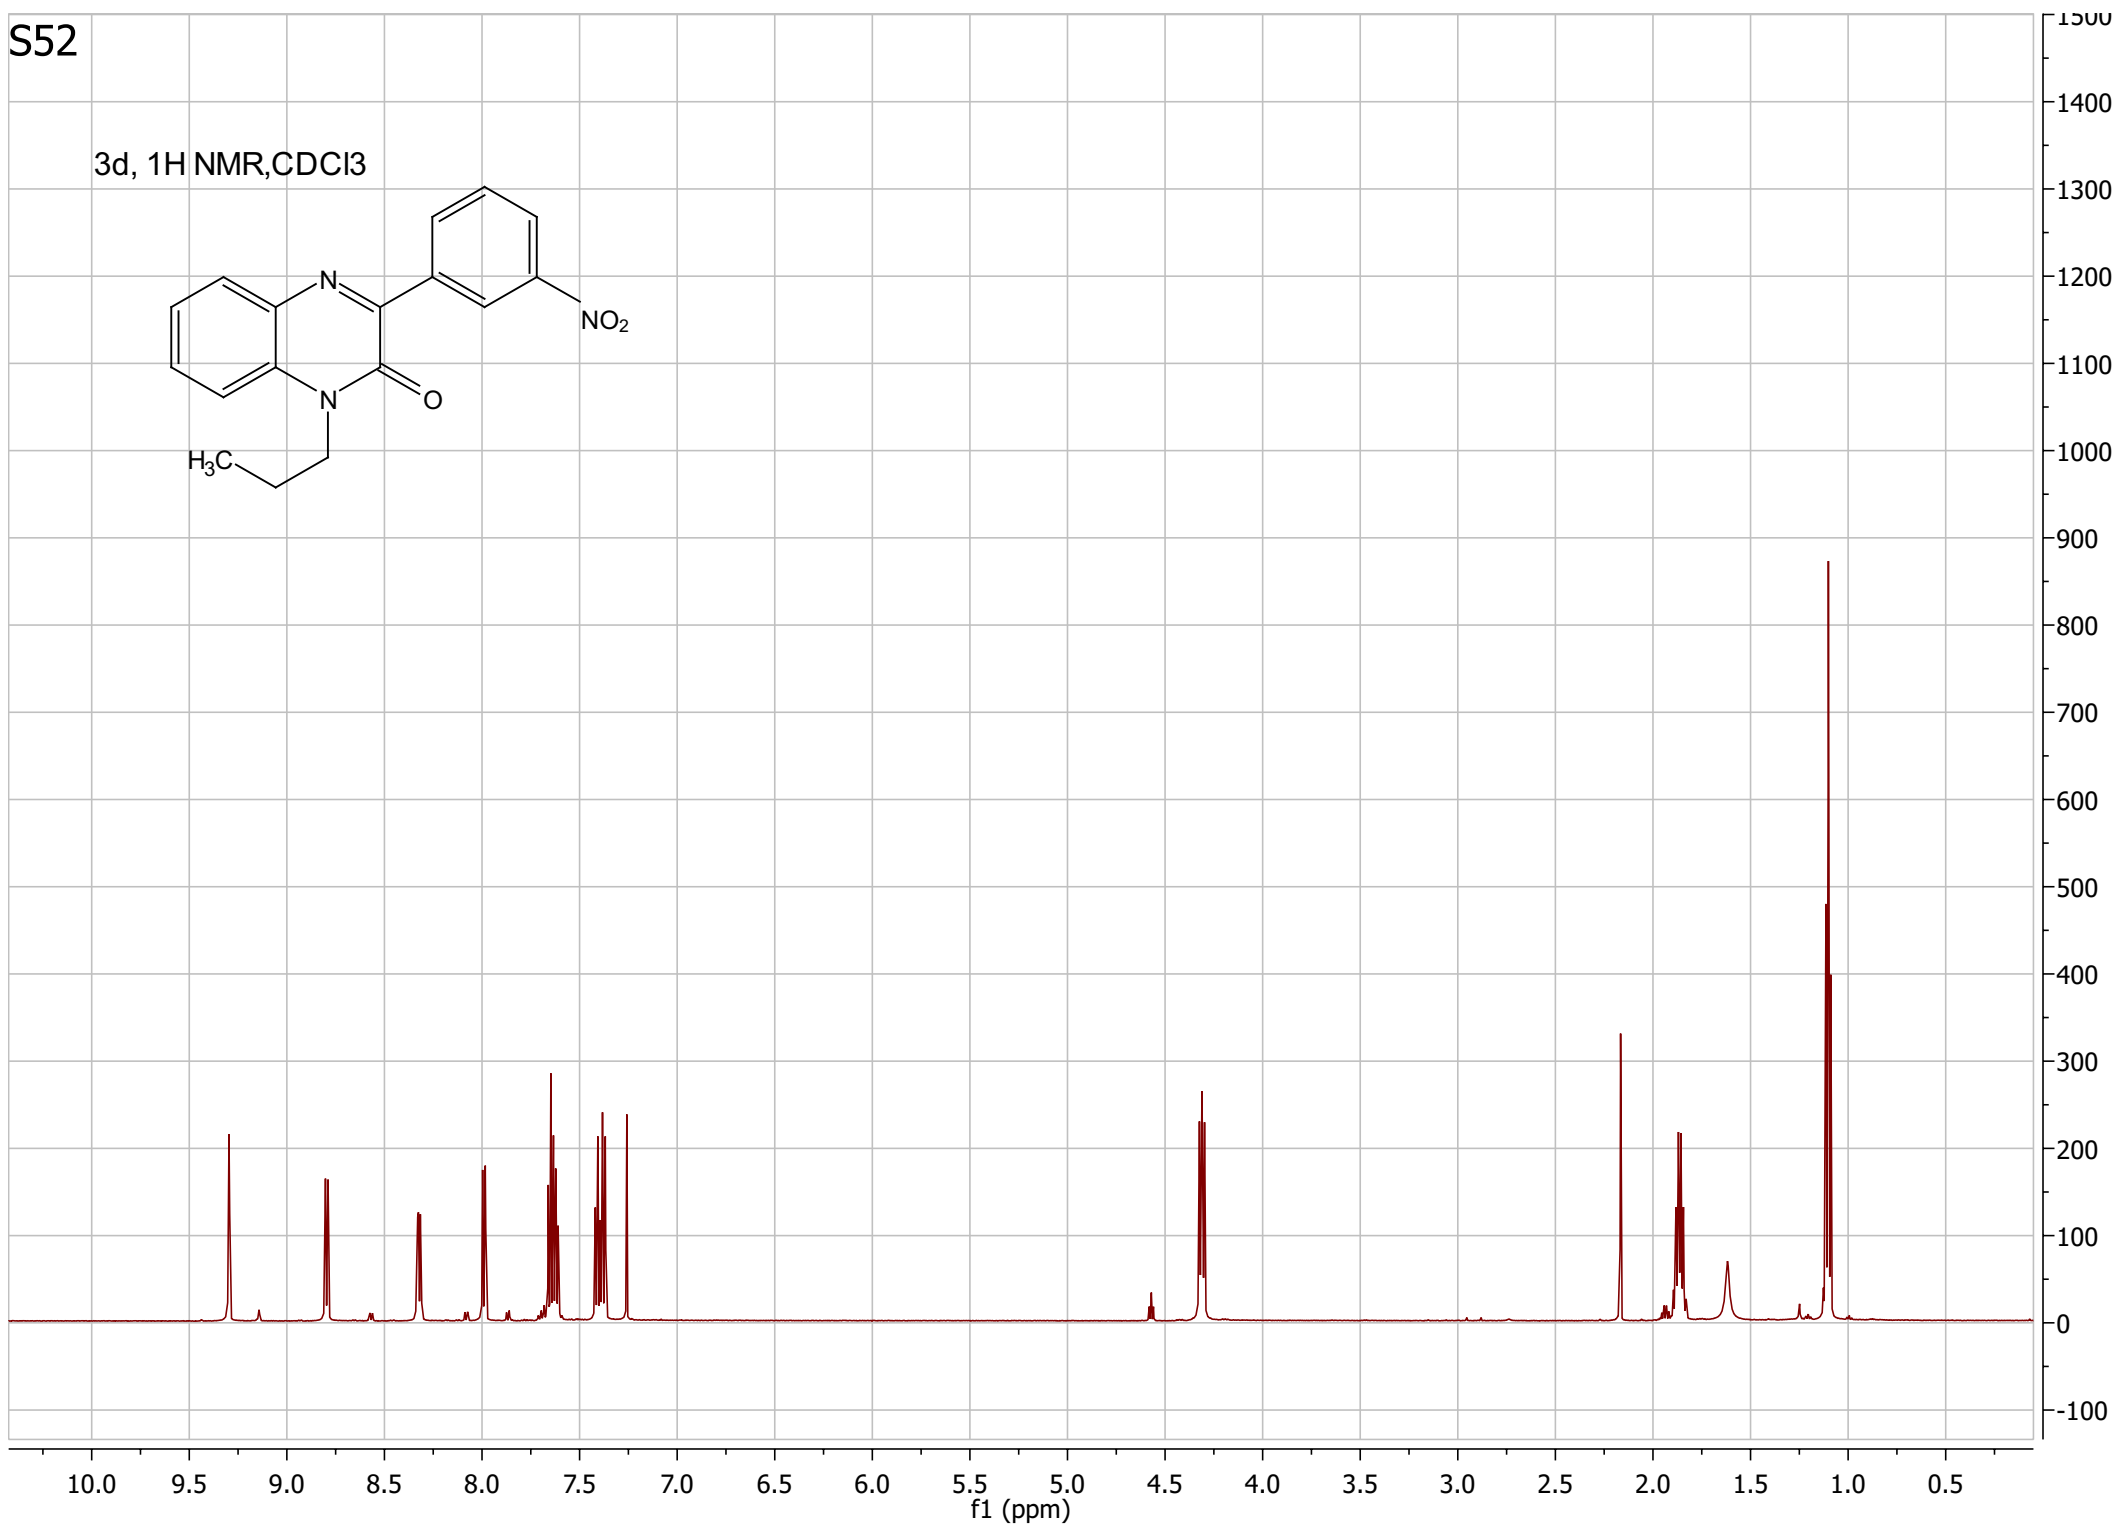

S53

3d, <sup>13</sup>C NMR, CDCl<sub>3</sub>

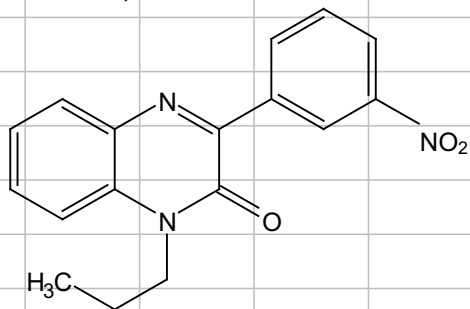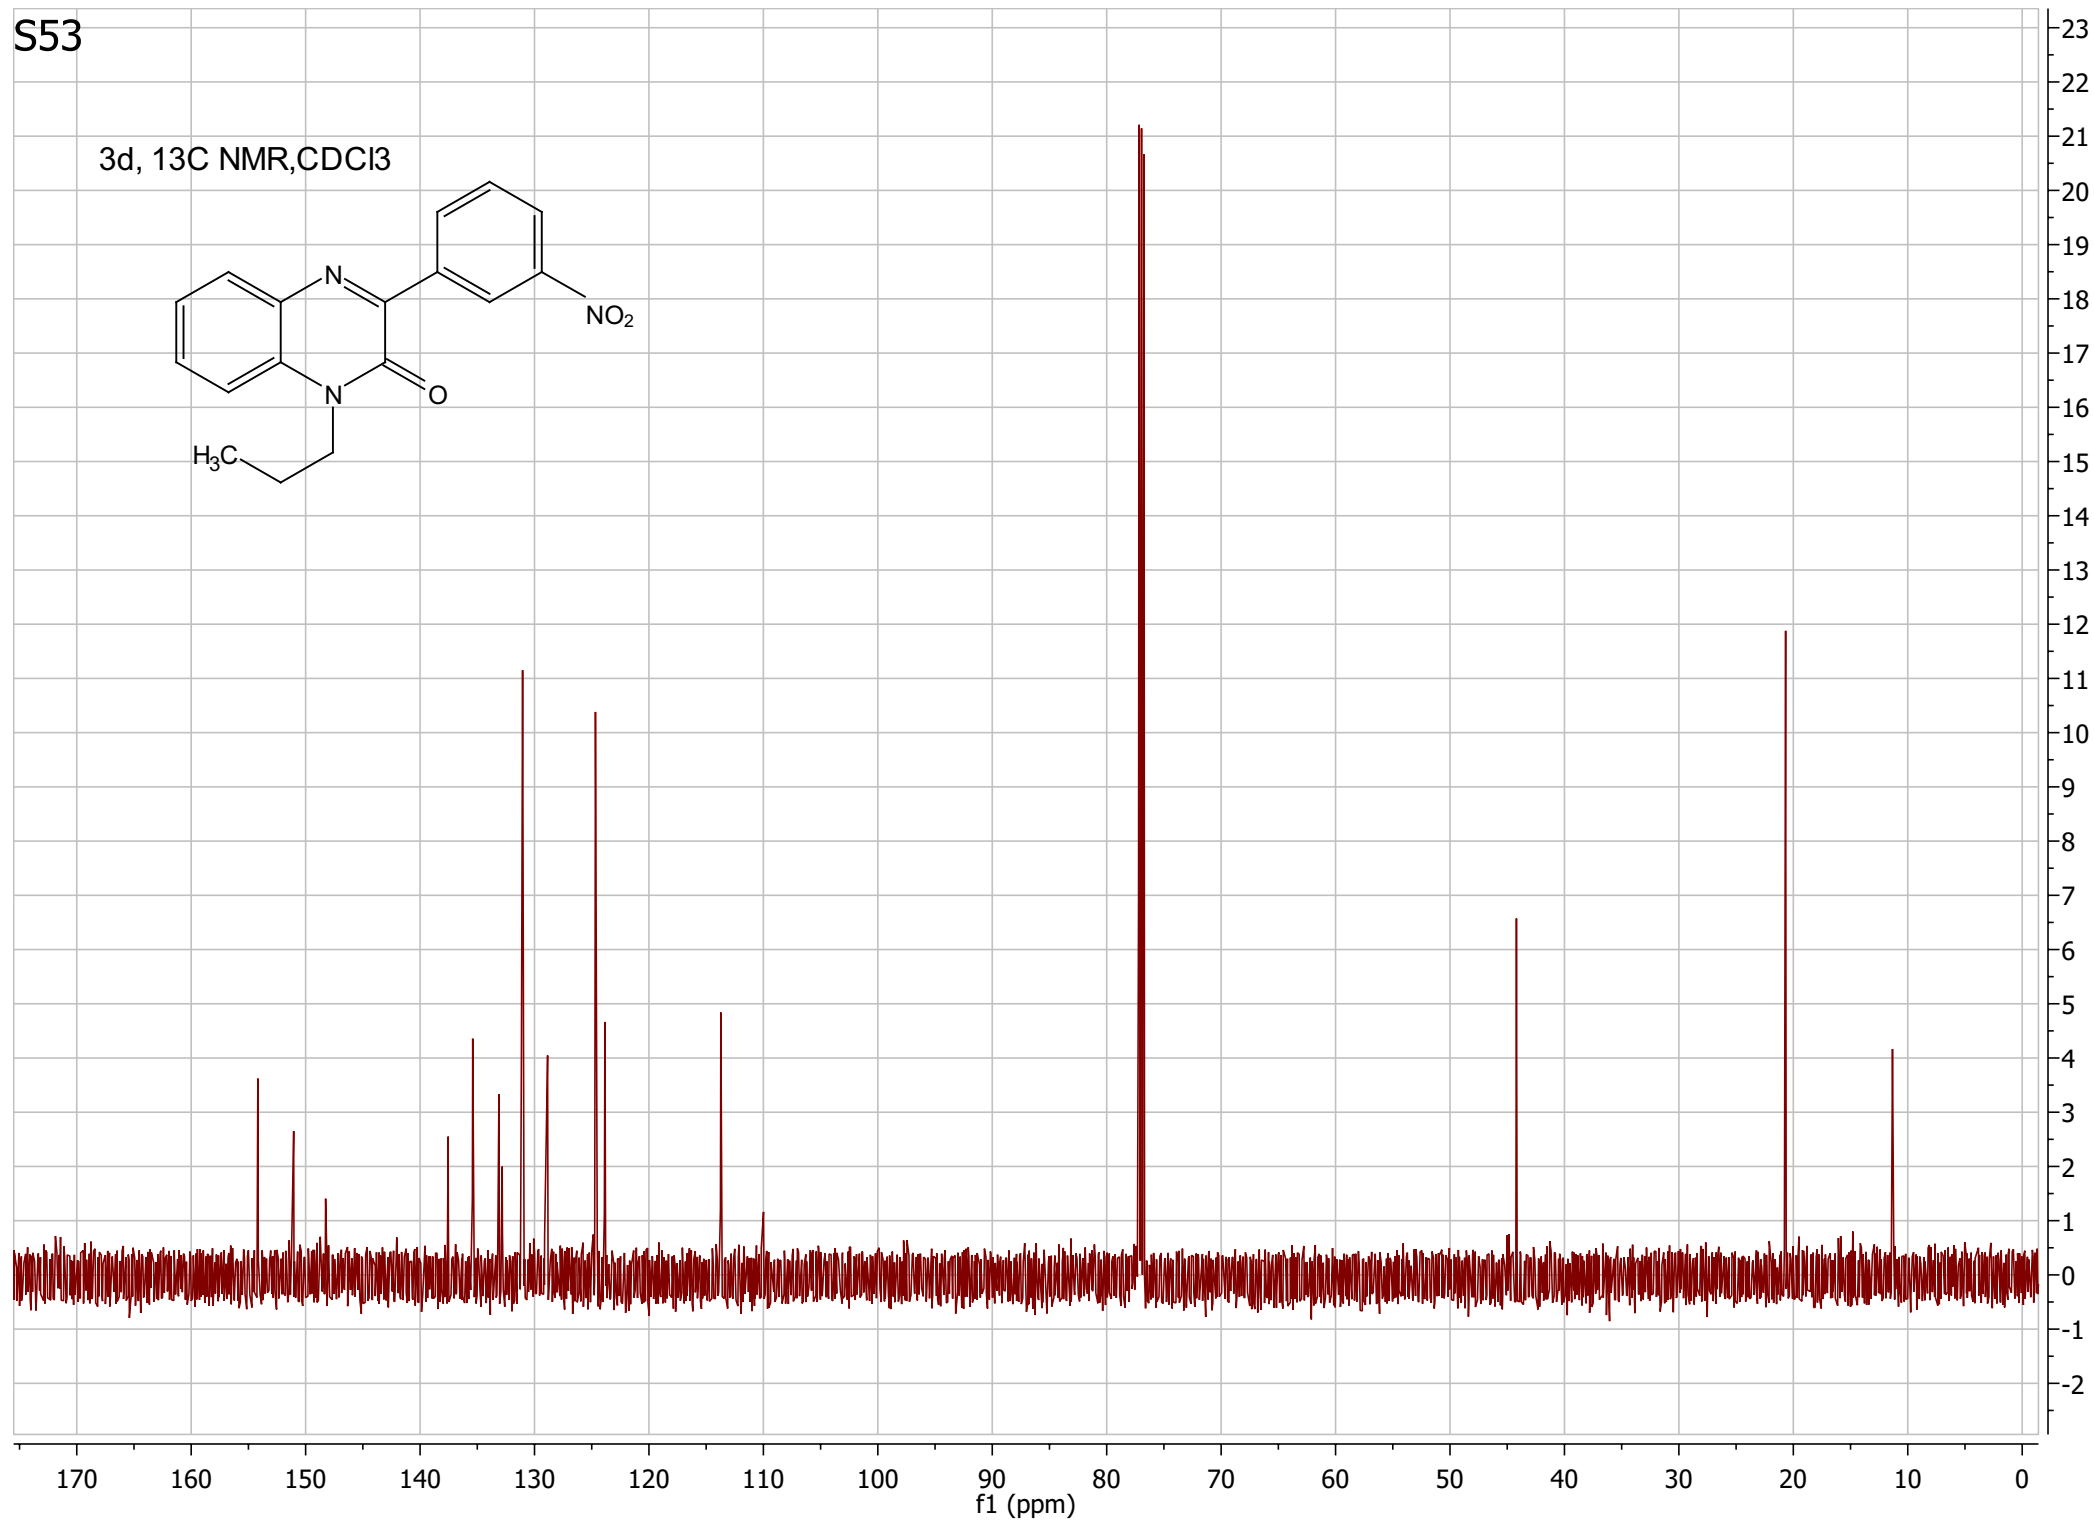

S54

3e, 1H NMR, CDCl3

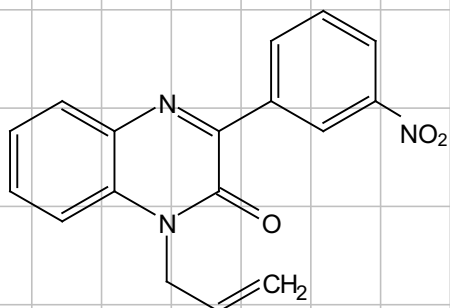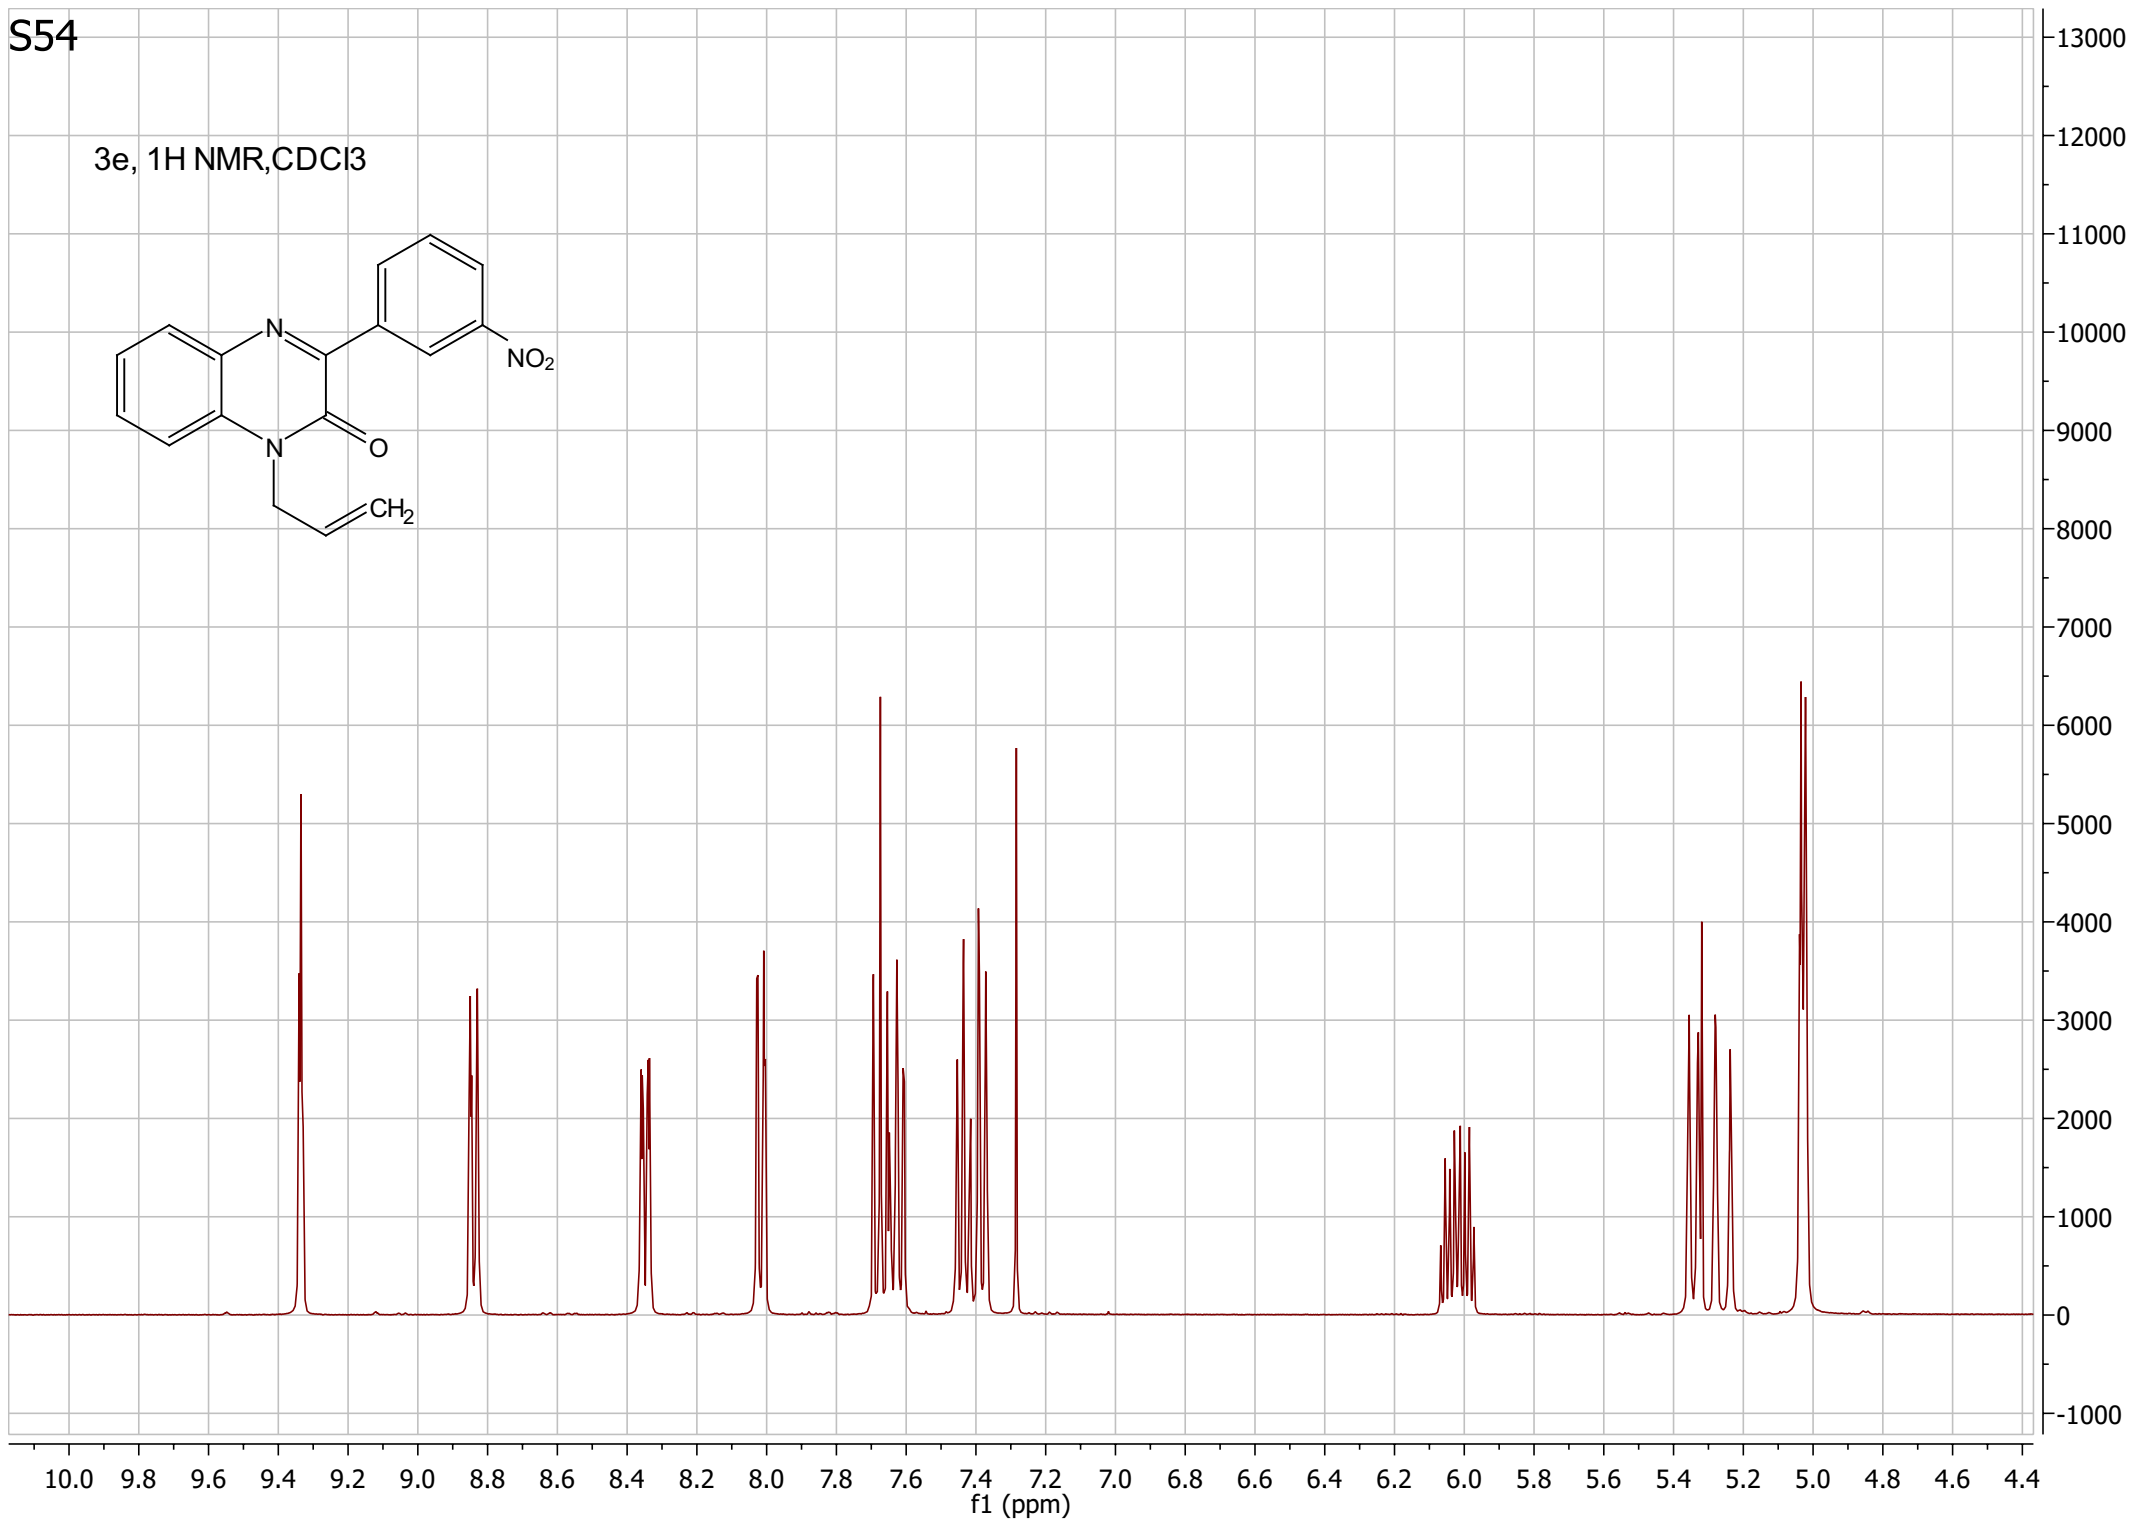

S55

3e, <sup>13</sup>C NMR, CDCl<sub>3</sub>

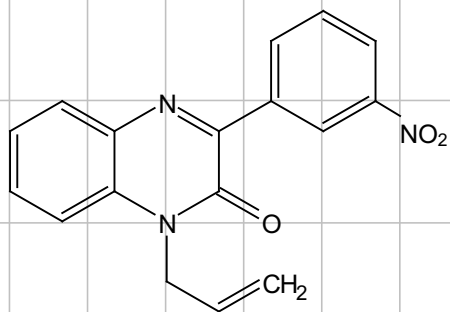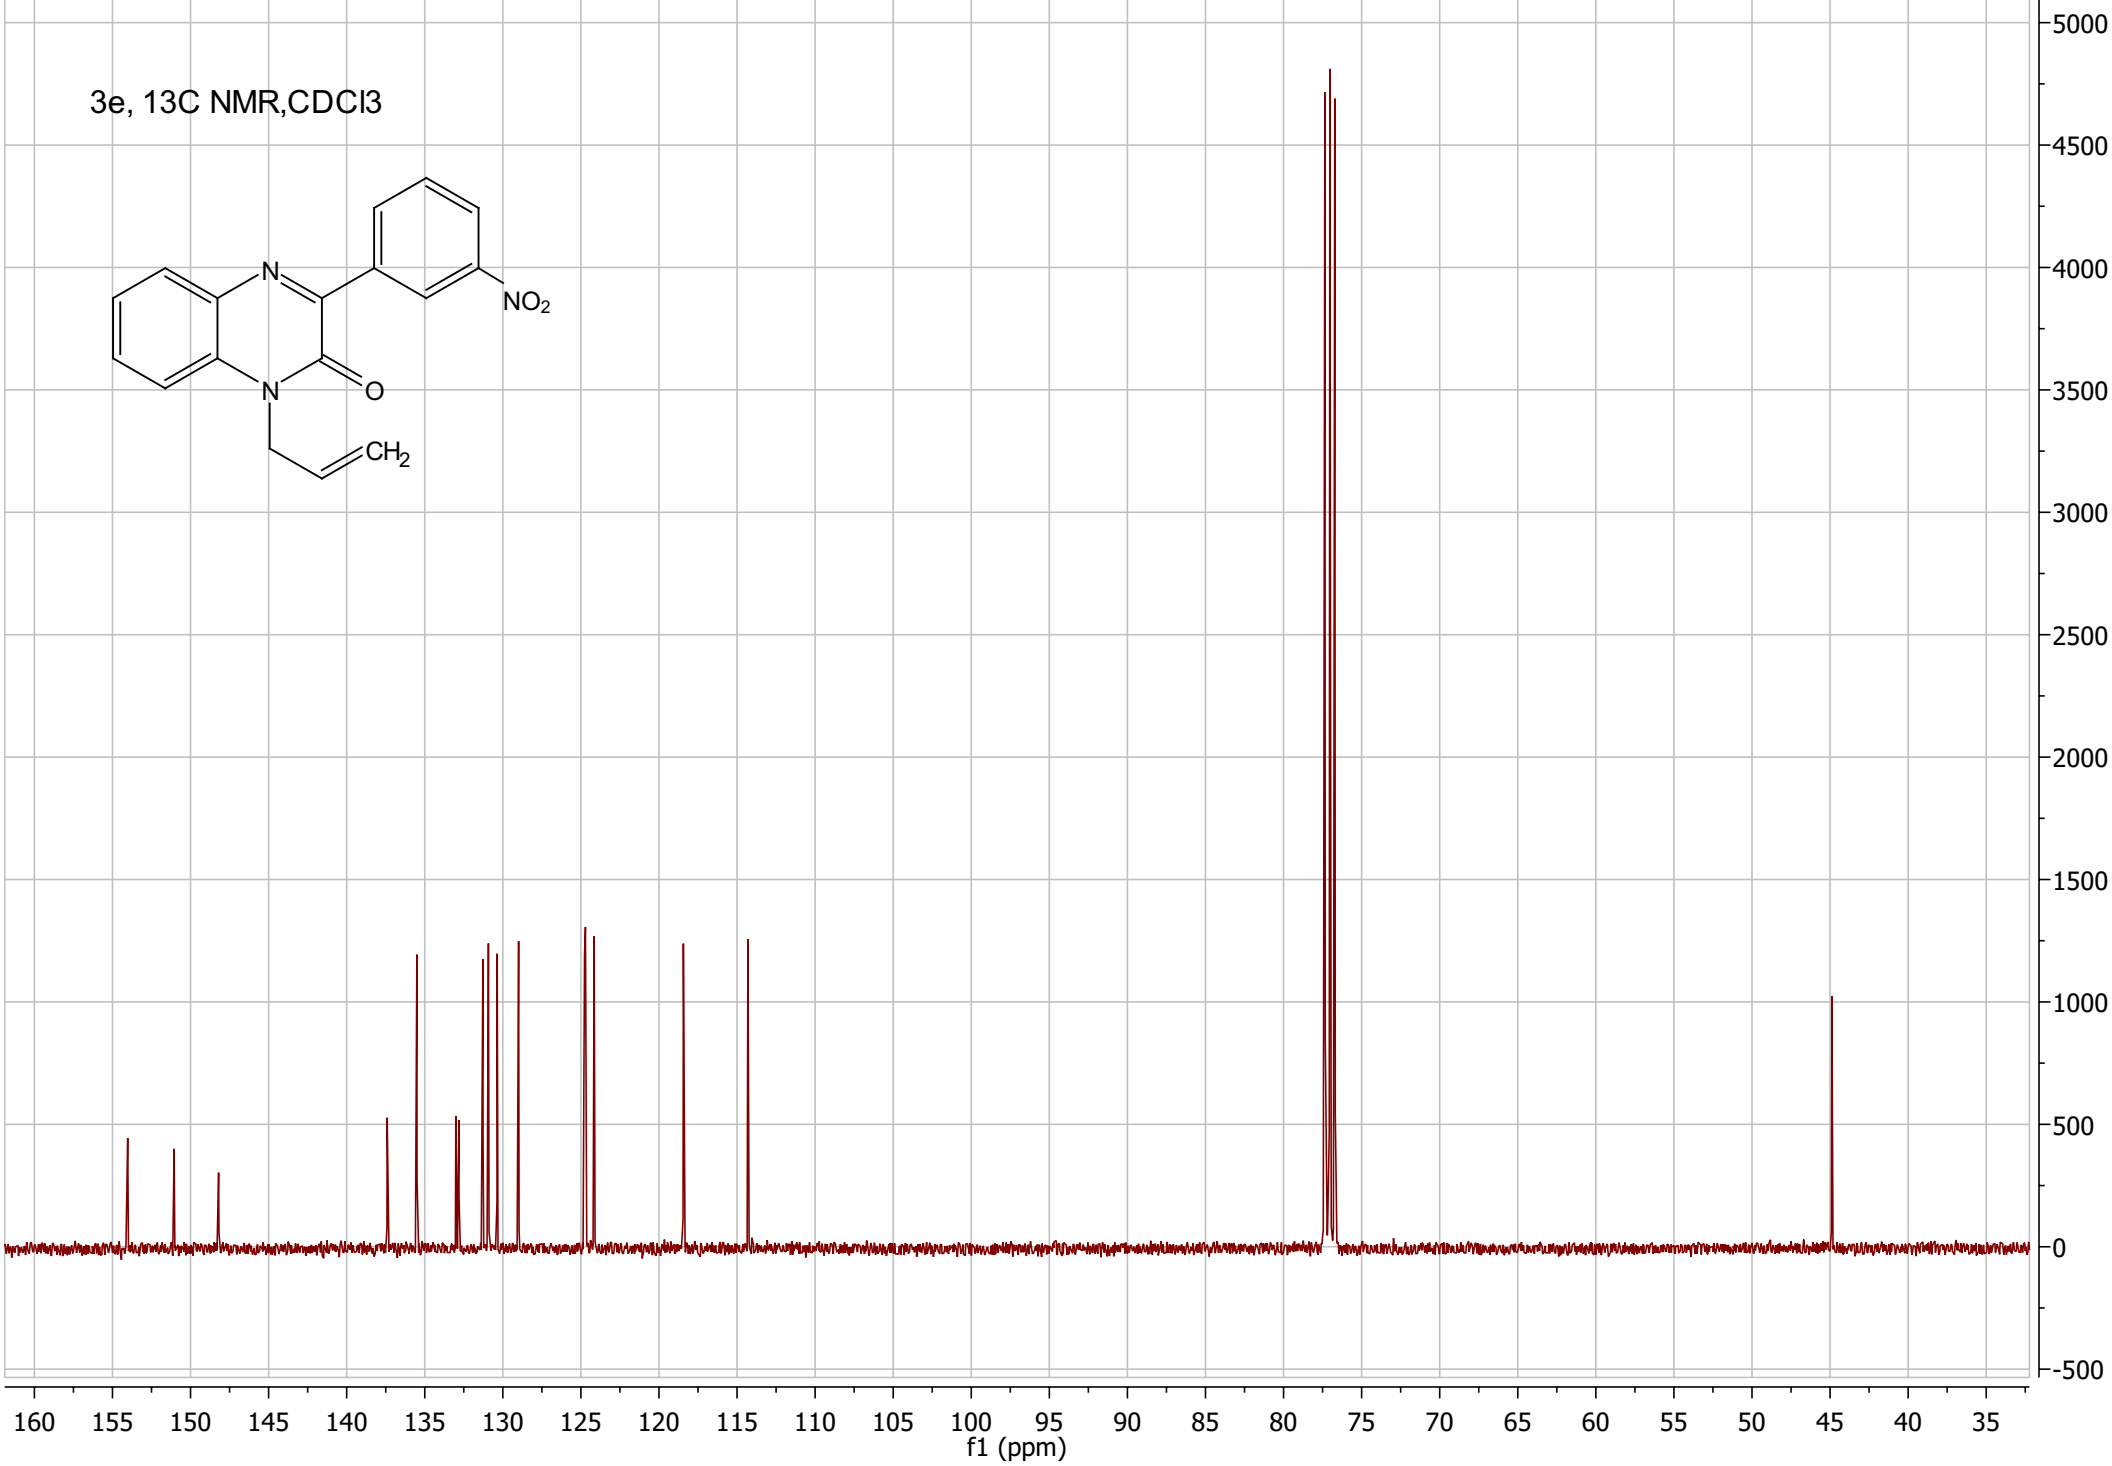

S56

3f, 1H NMR, CDCl3

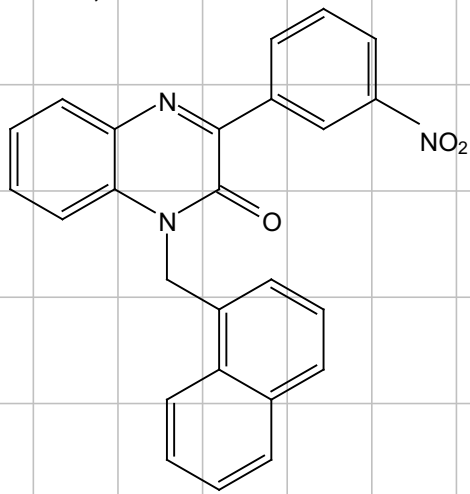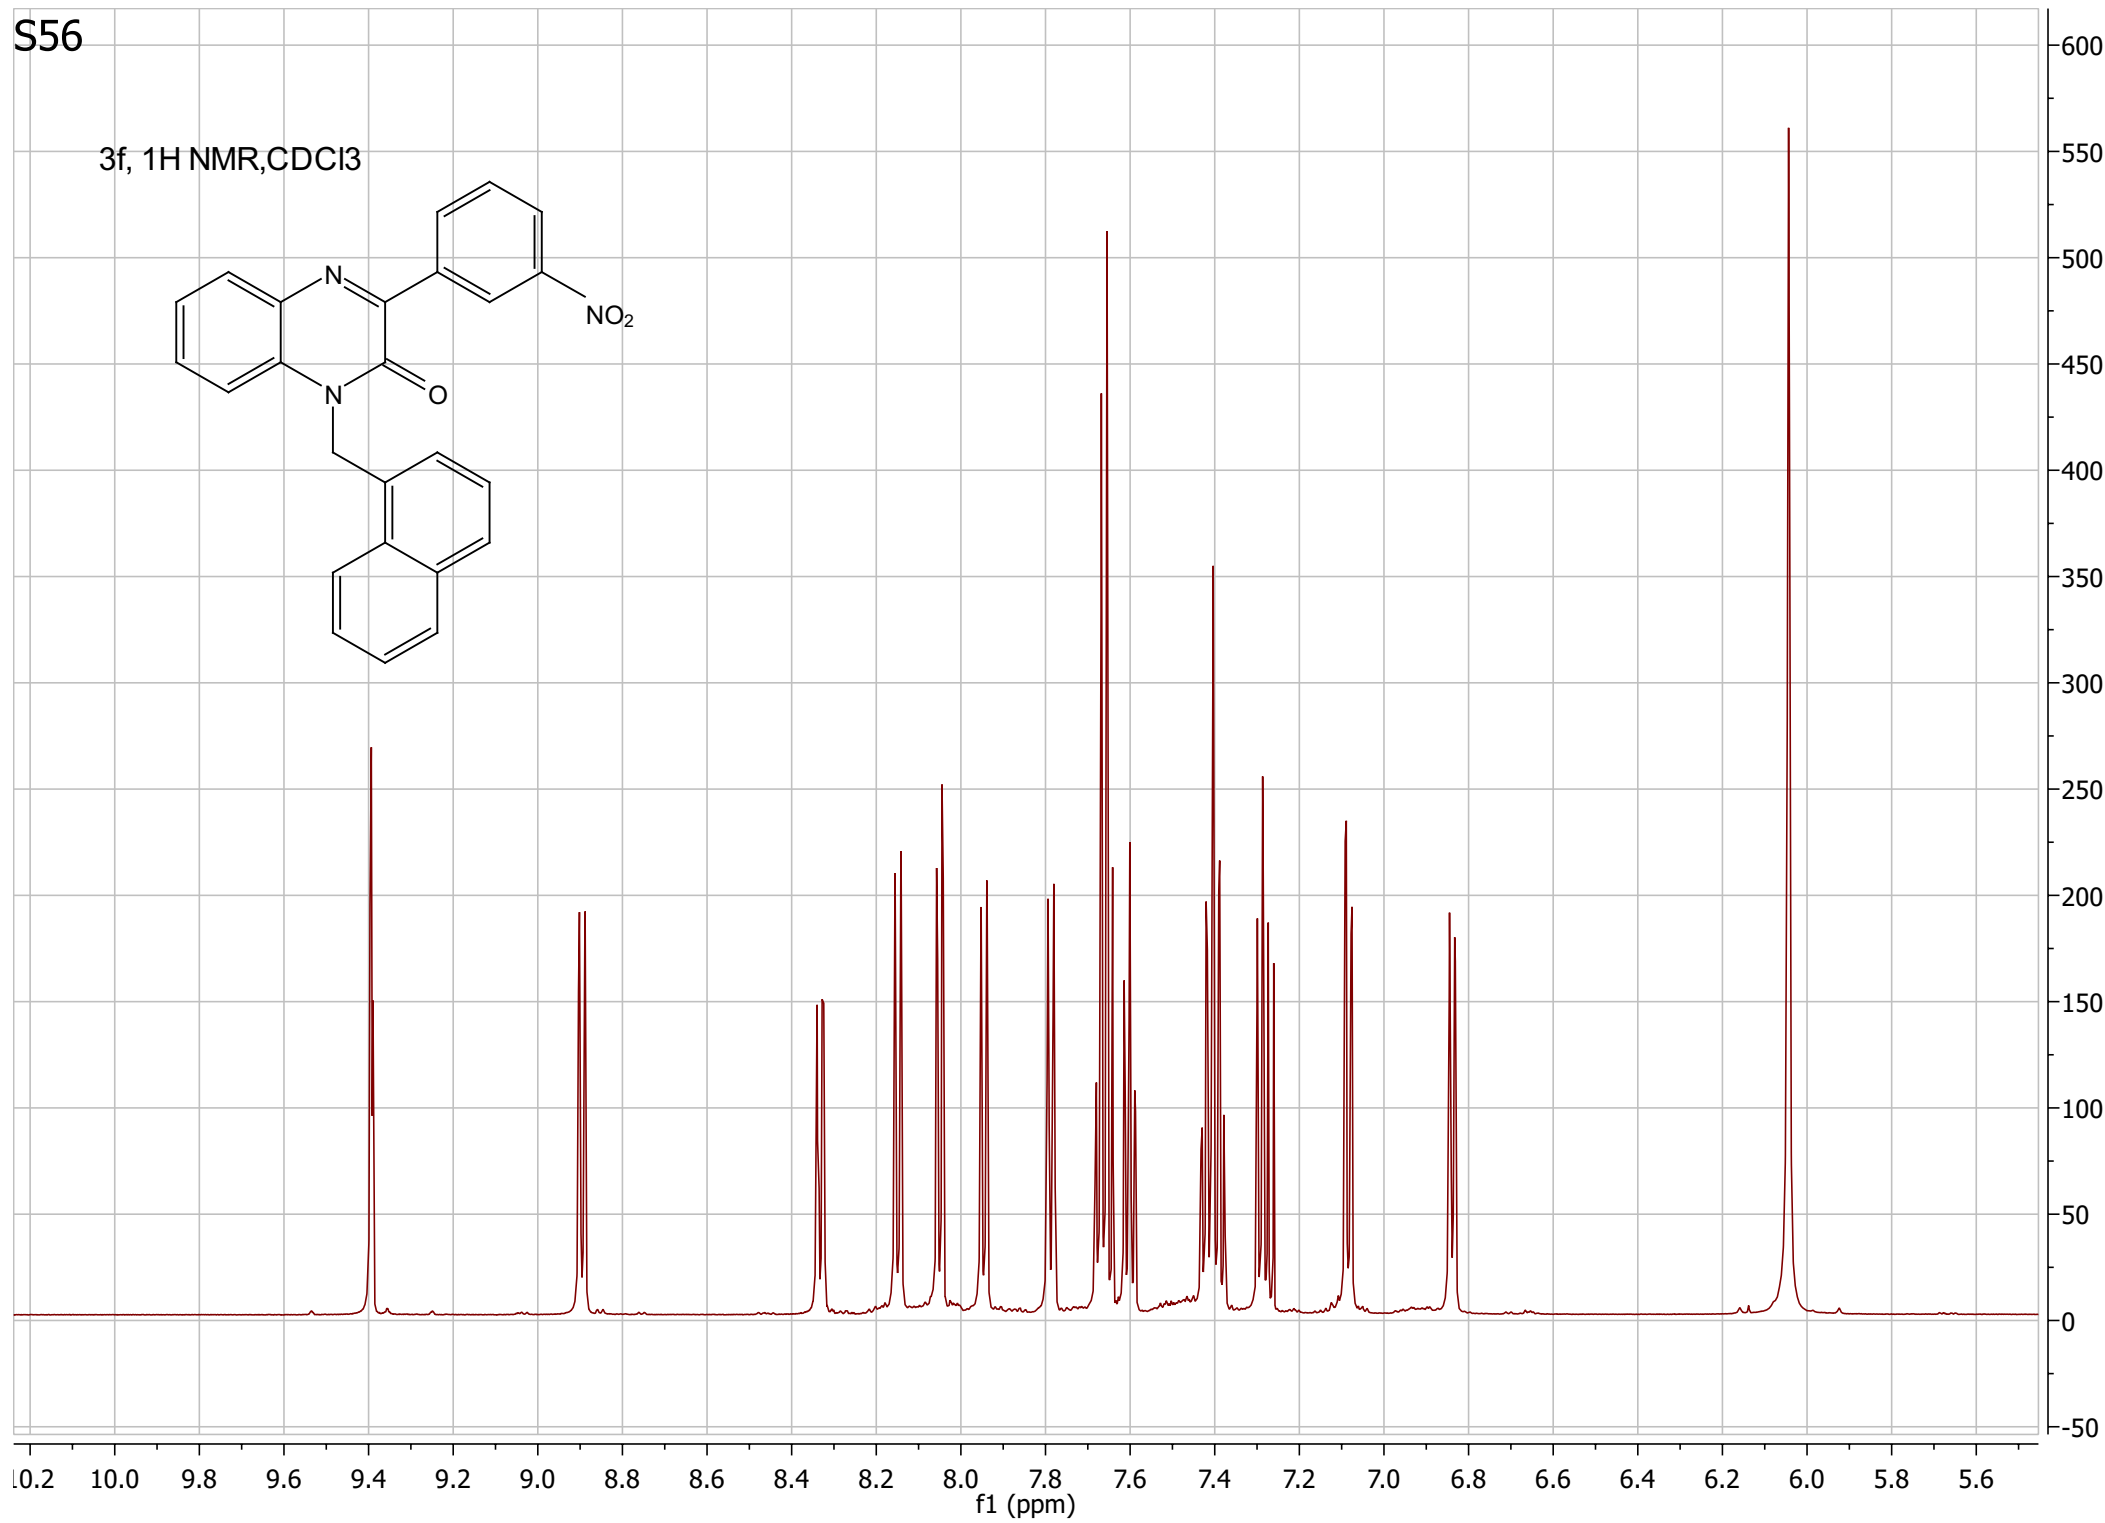



S57

3f, <sup>13</sup>C NMR, CDCl<sub>3</sub>

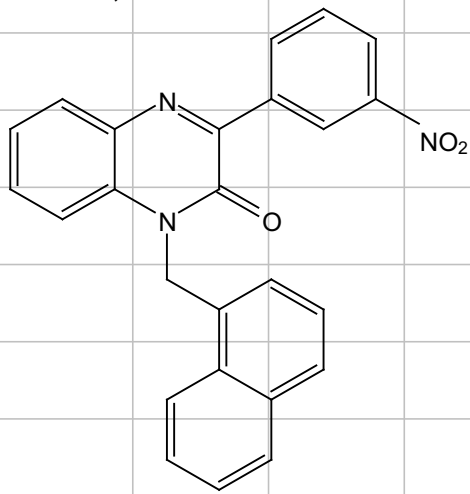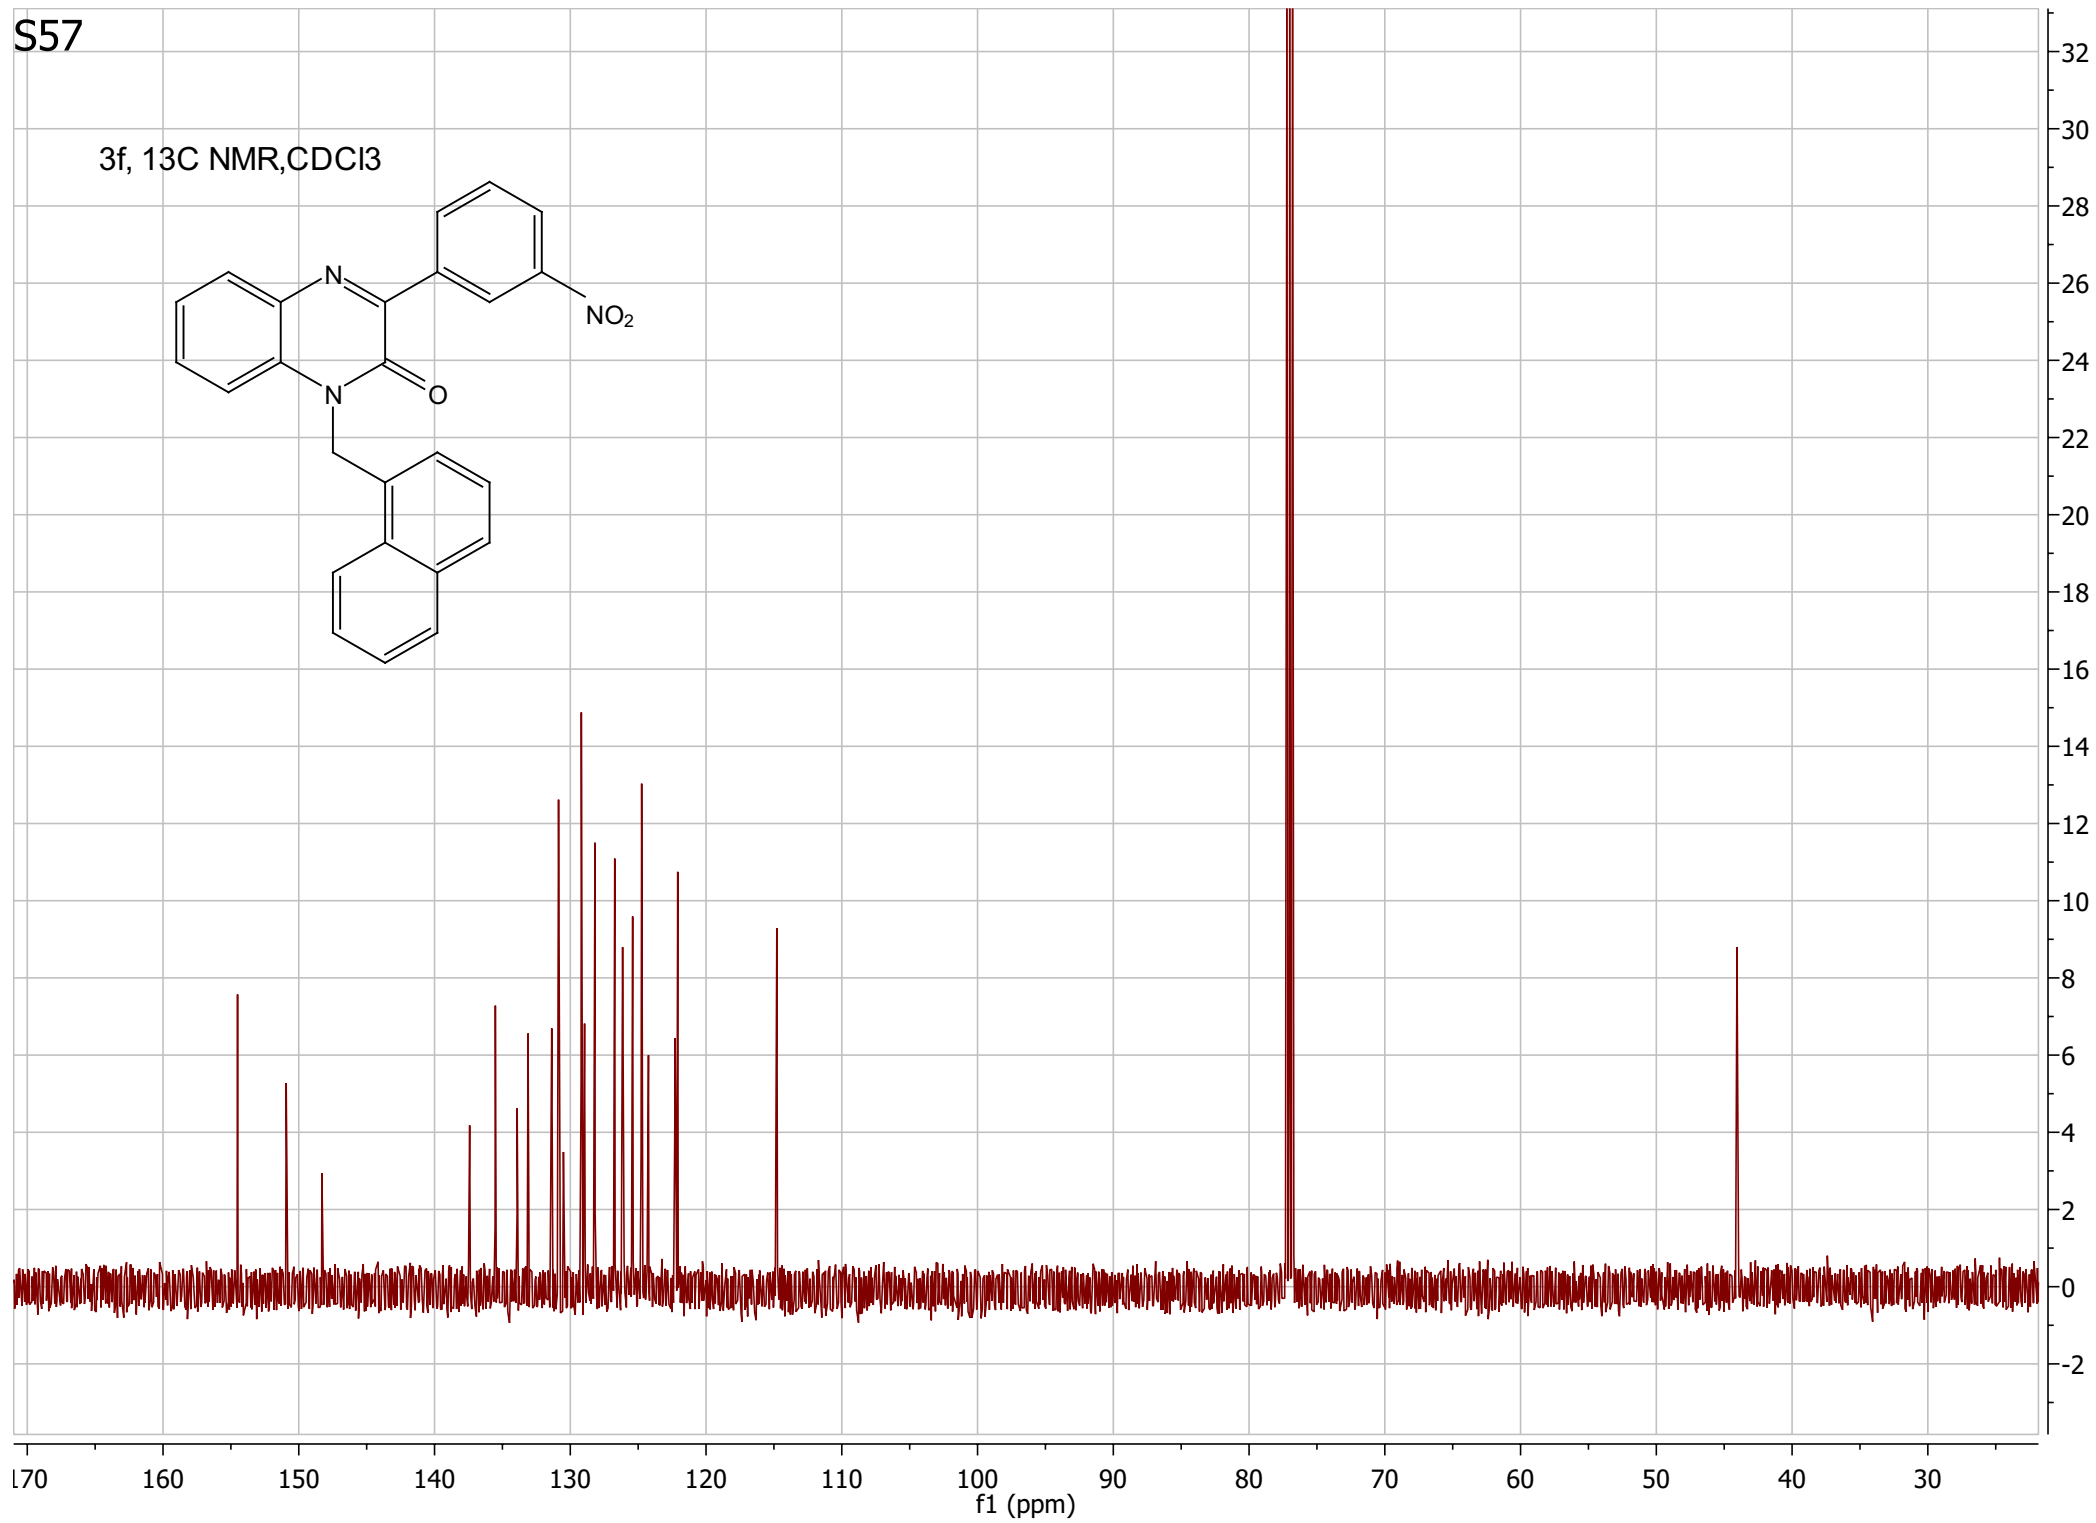

S58

3g, <sup>1</sup>H NMR, CDCl<sub>3</sub>

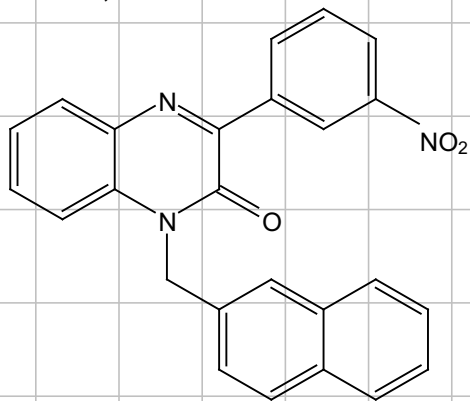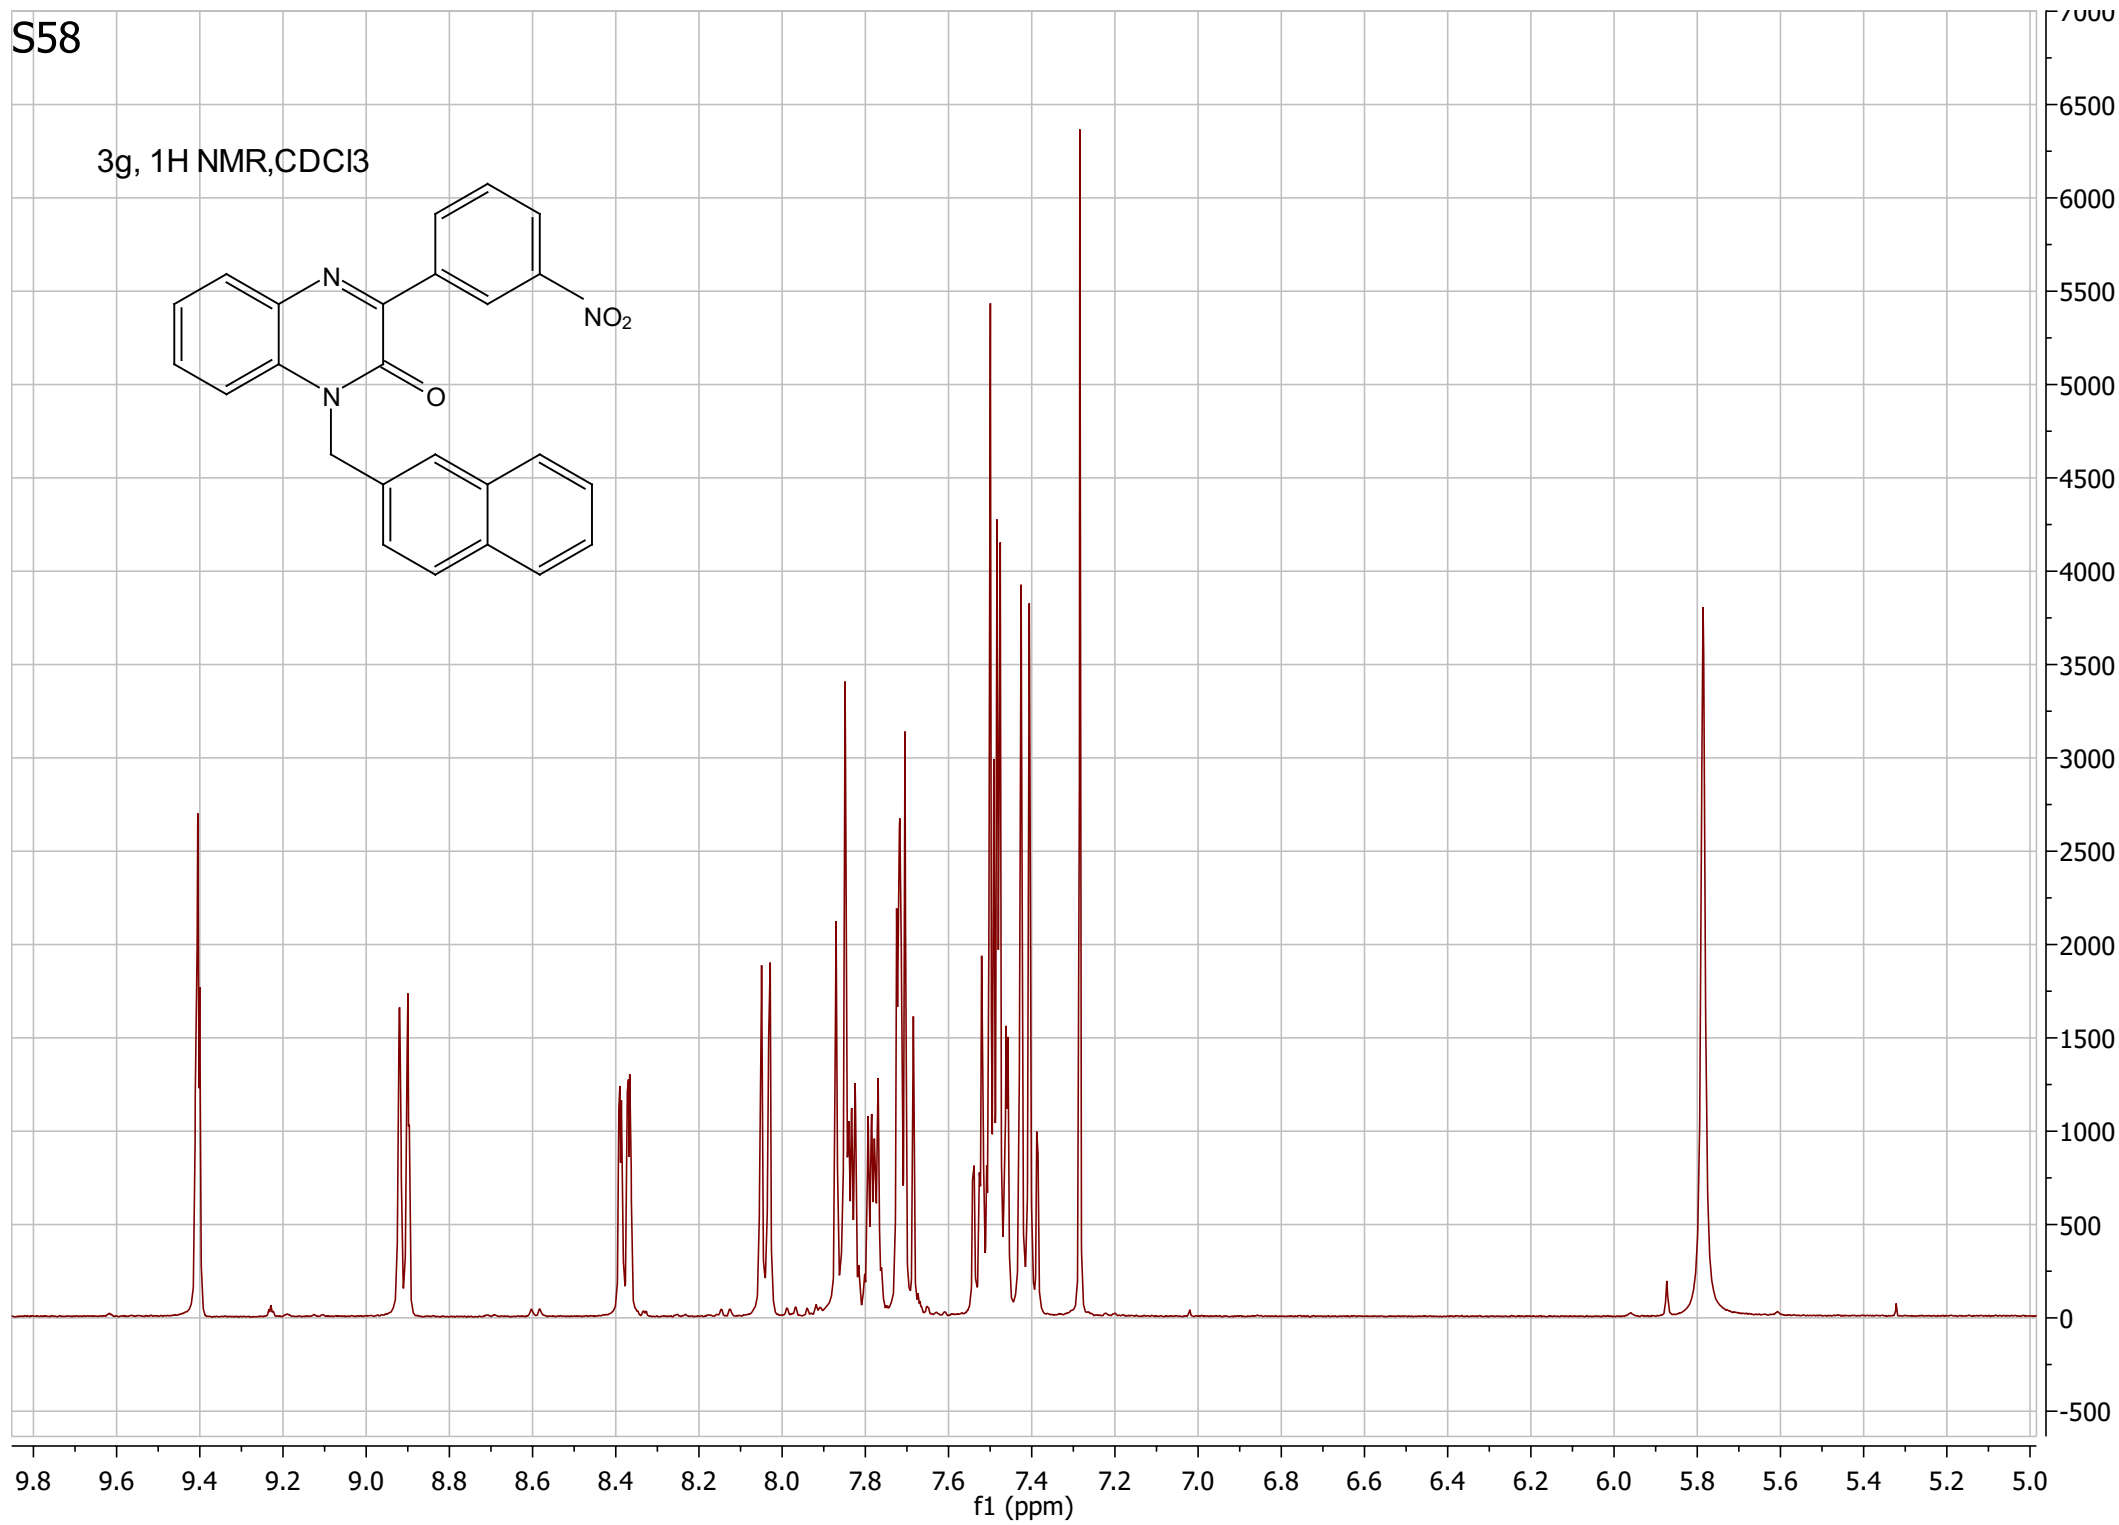

S59

3g, <sup>13</sup>C NMR, CDCl<sub>3</sub>

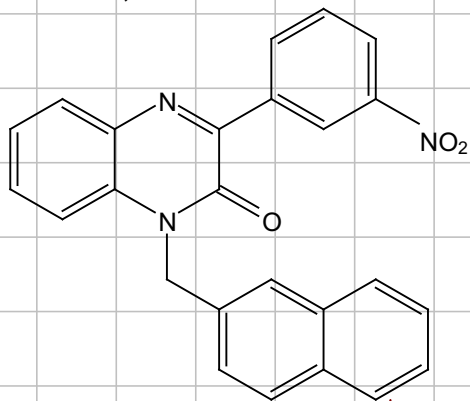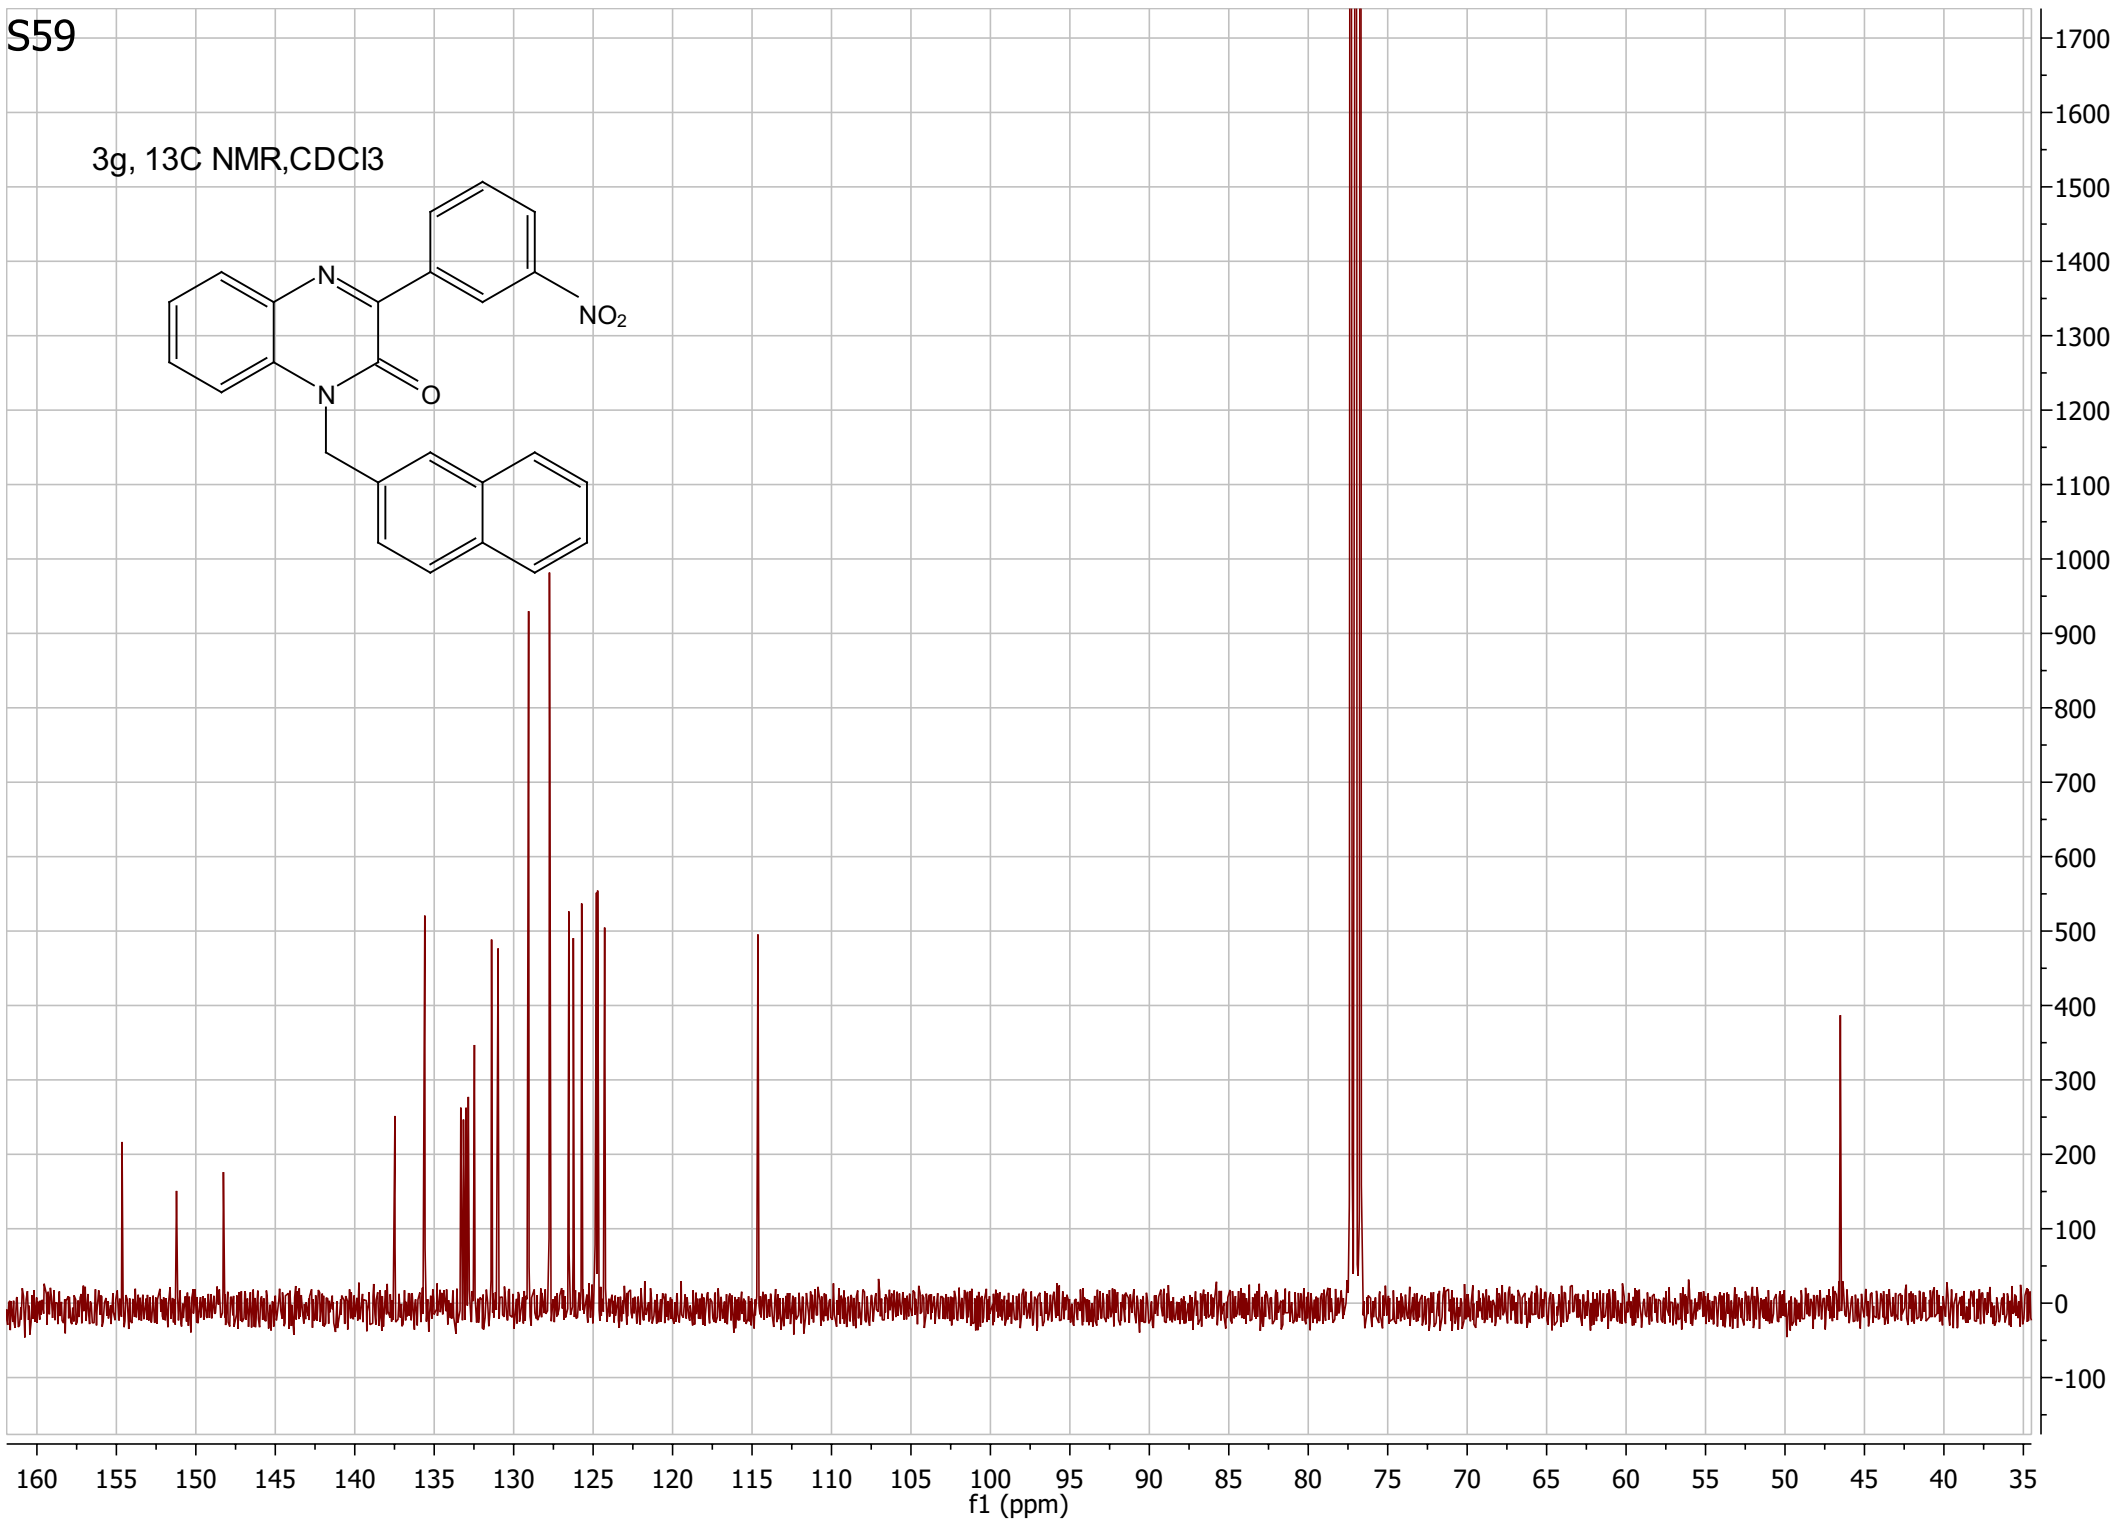

S60

3h, 1H NMR, CDCl3

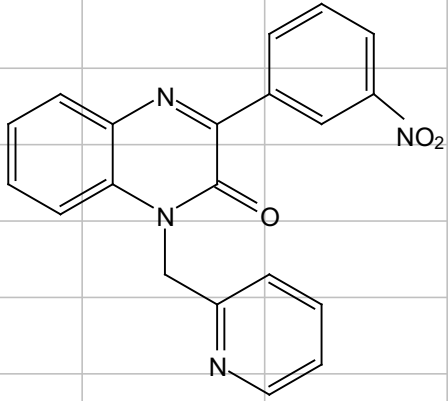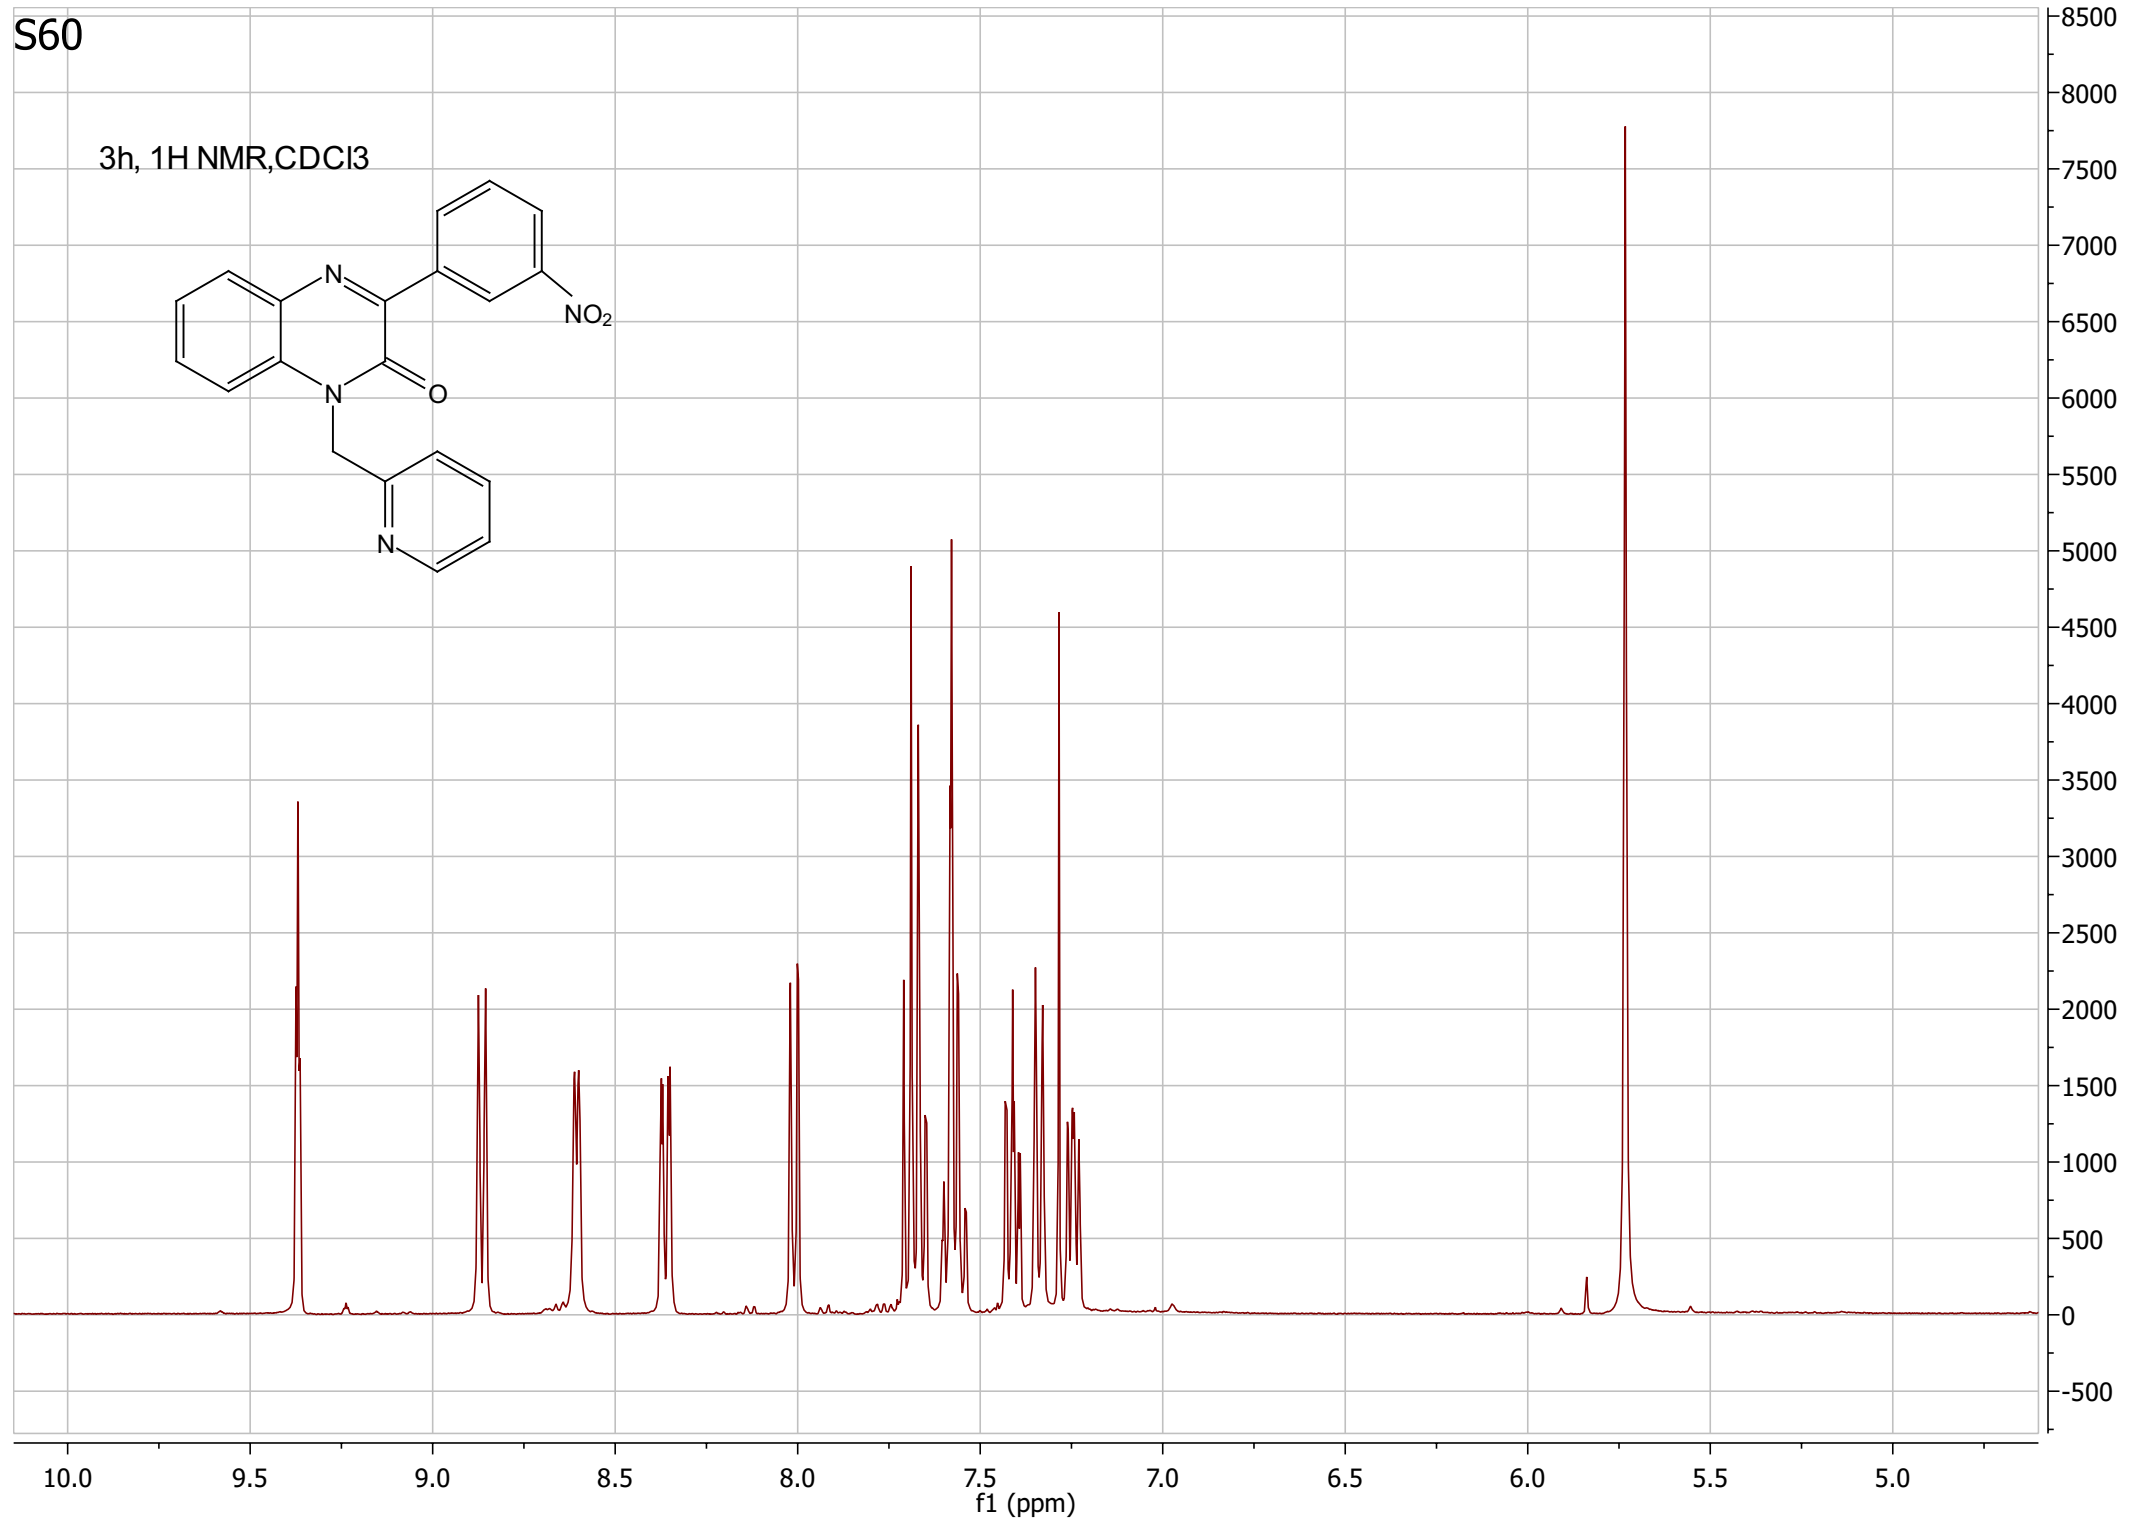

S61

3h, <sup>13</sup>C NMR, CDCl<sub>3</sub>

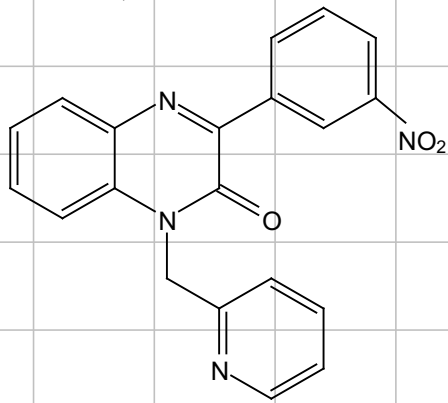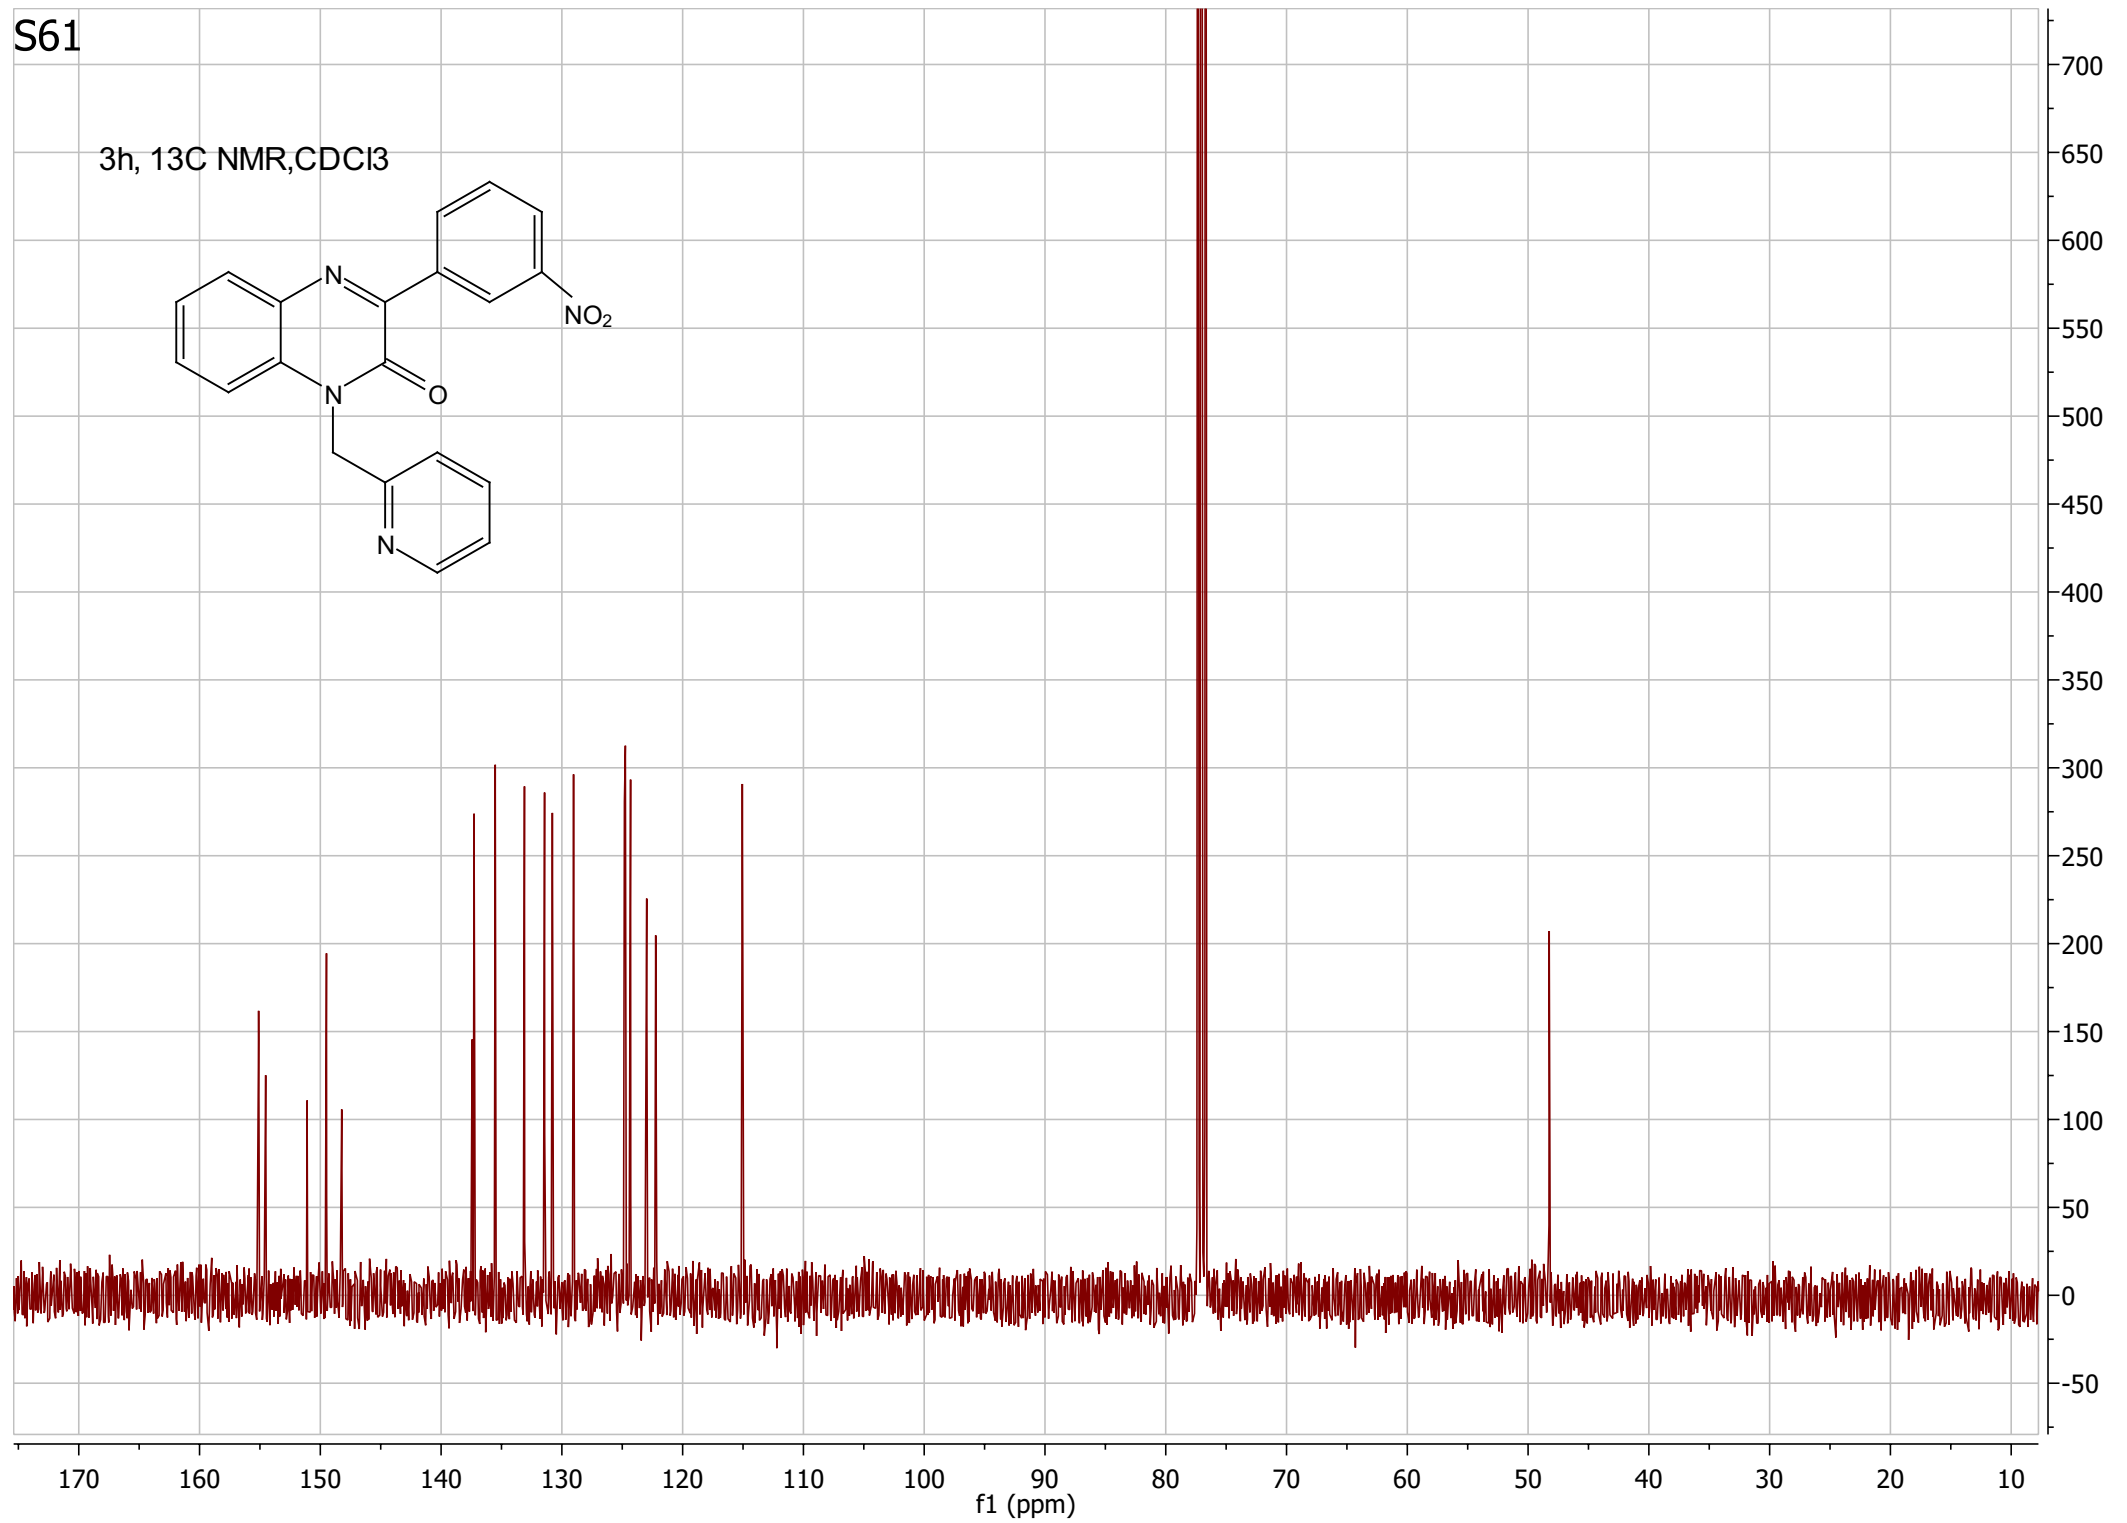

S62

3i, <sup>1</sup>H NMR, DMSO-d<sub>6</sub>

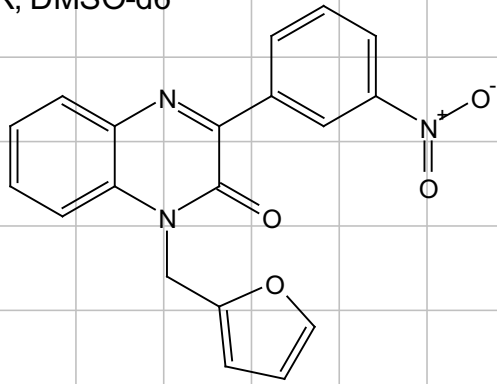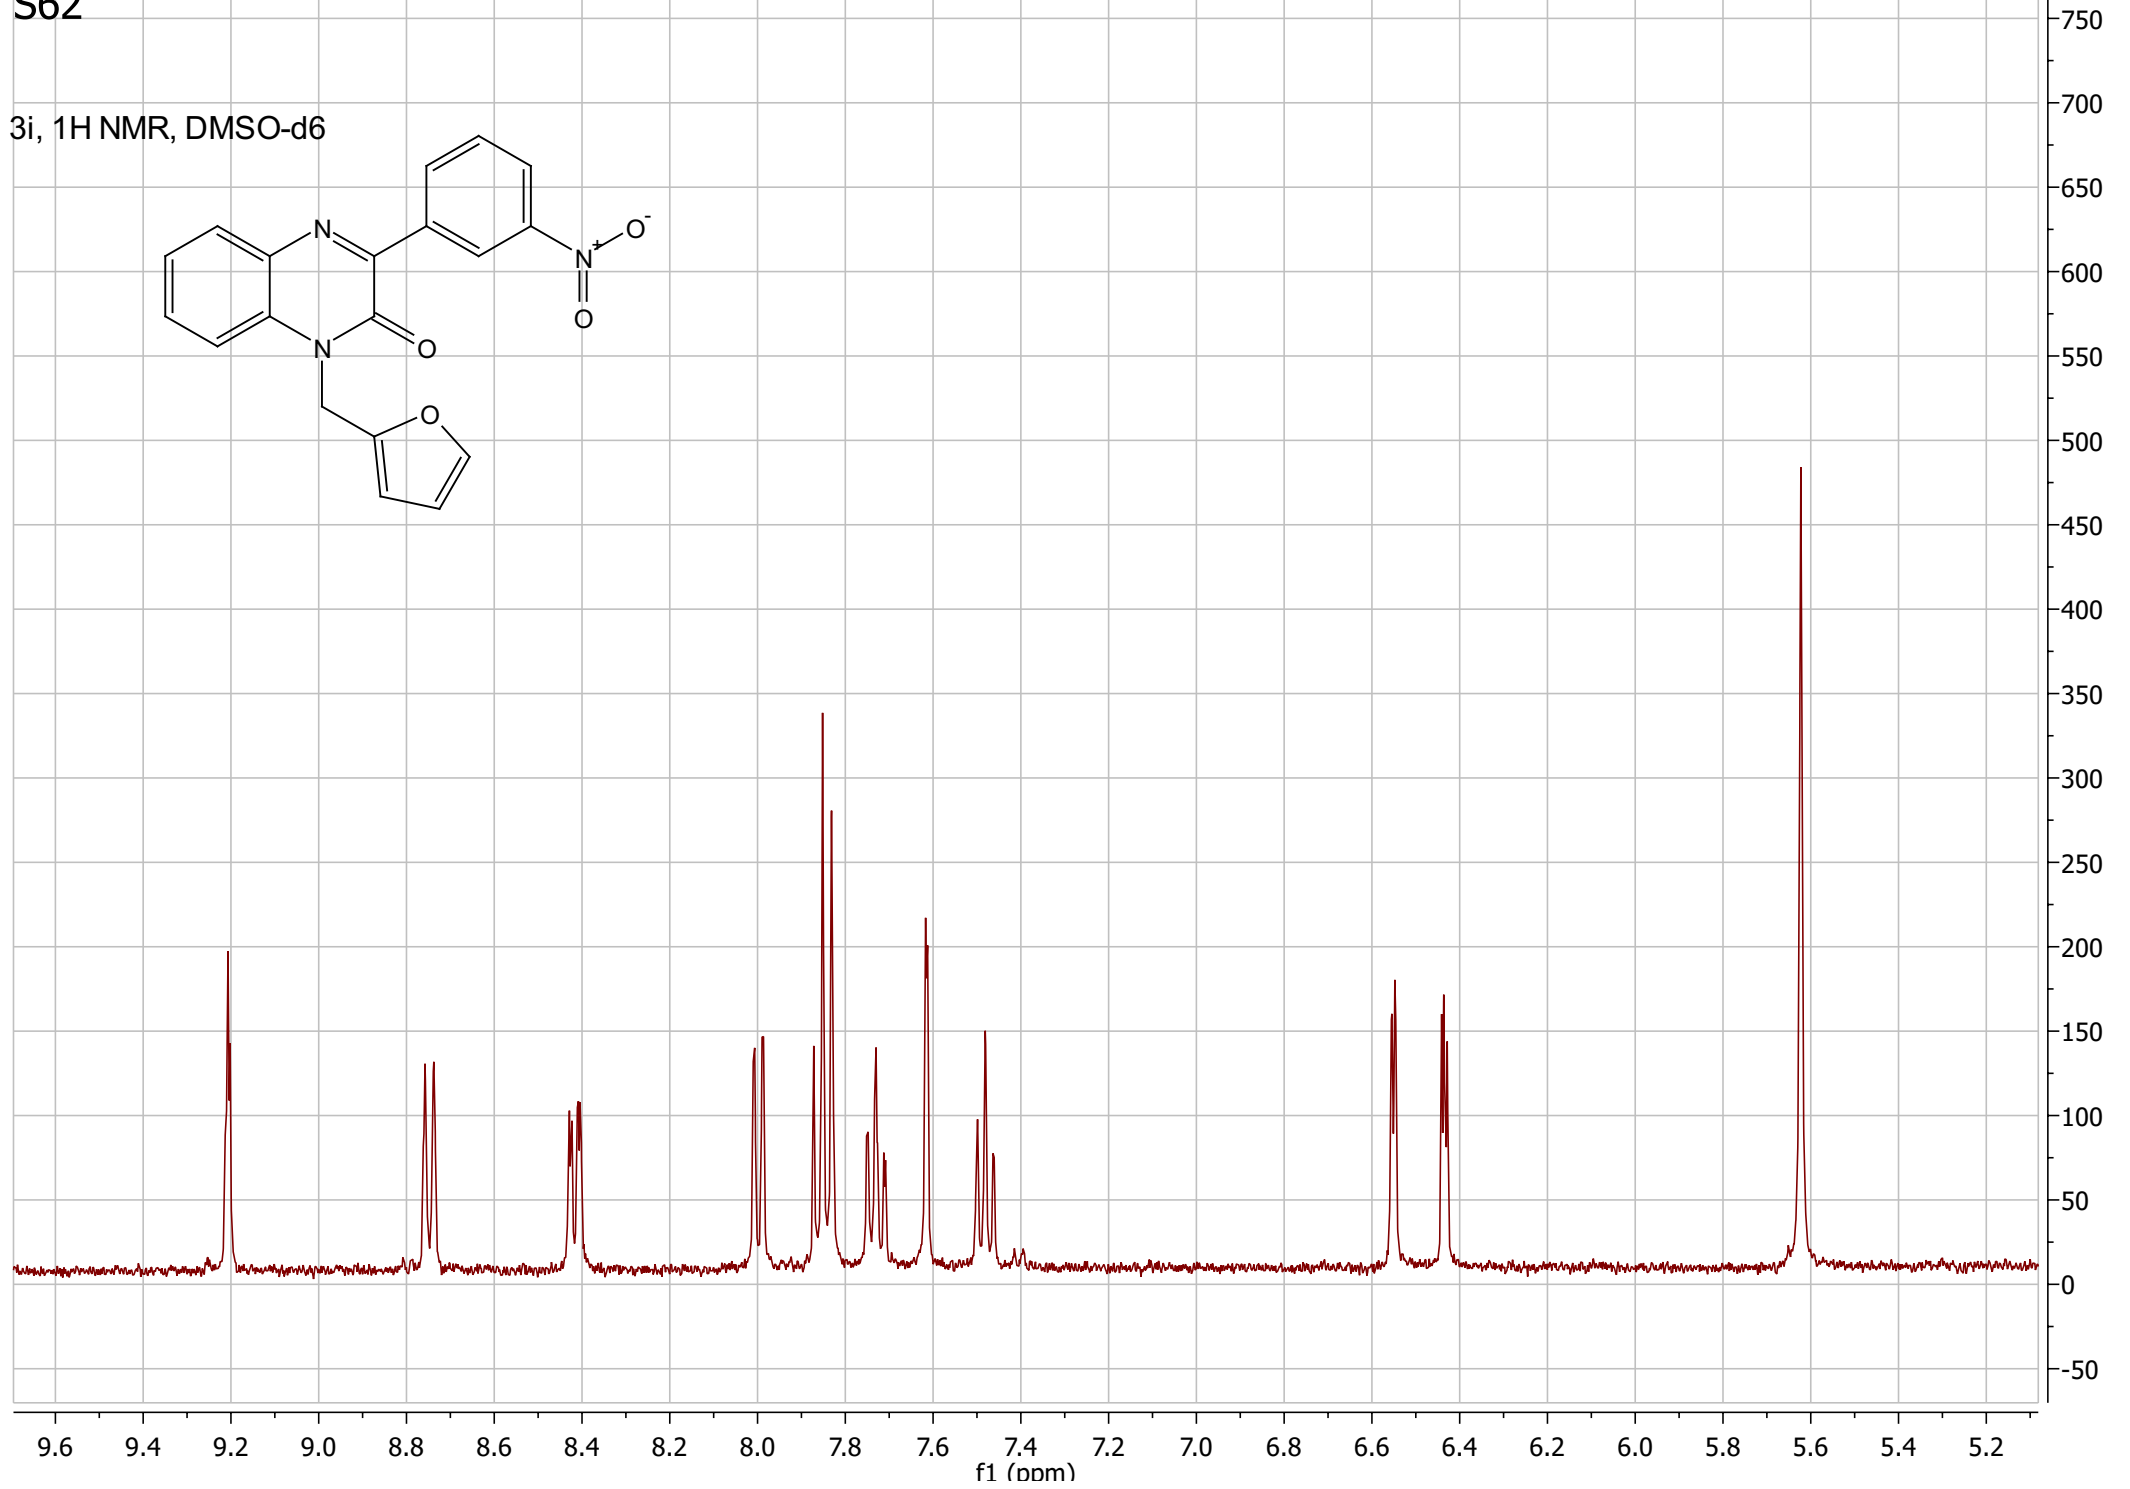

S63

3j, 1H NMR, CDCl3

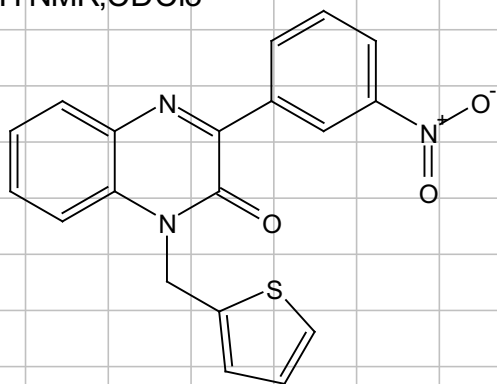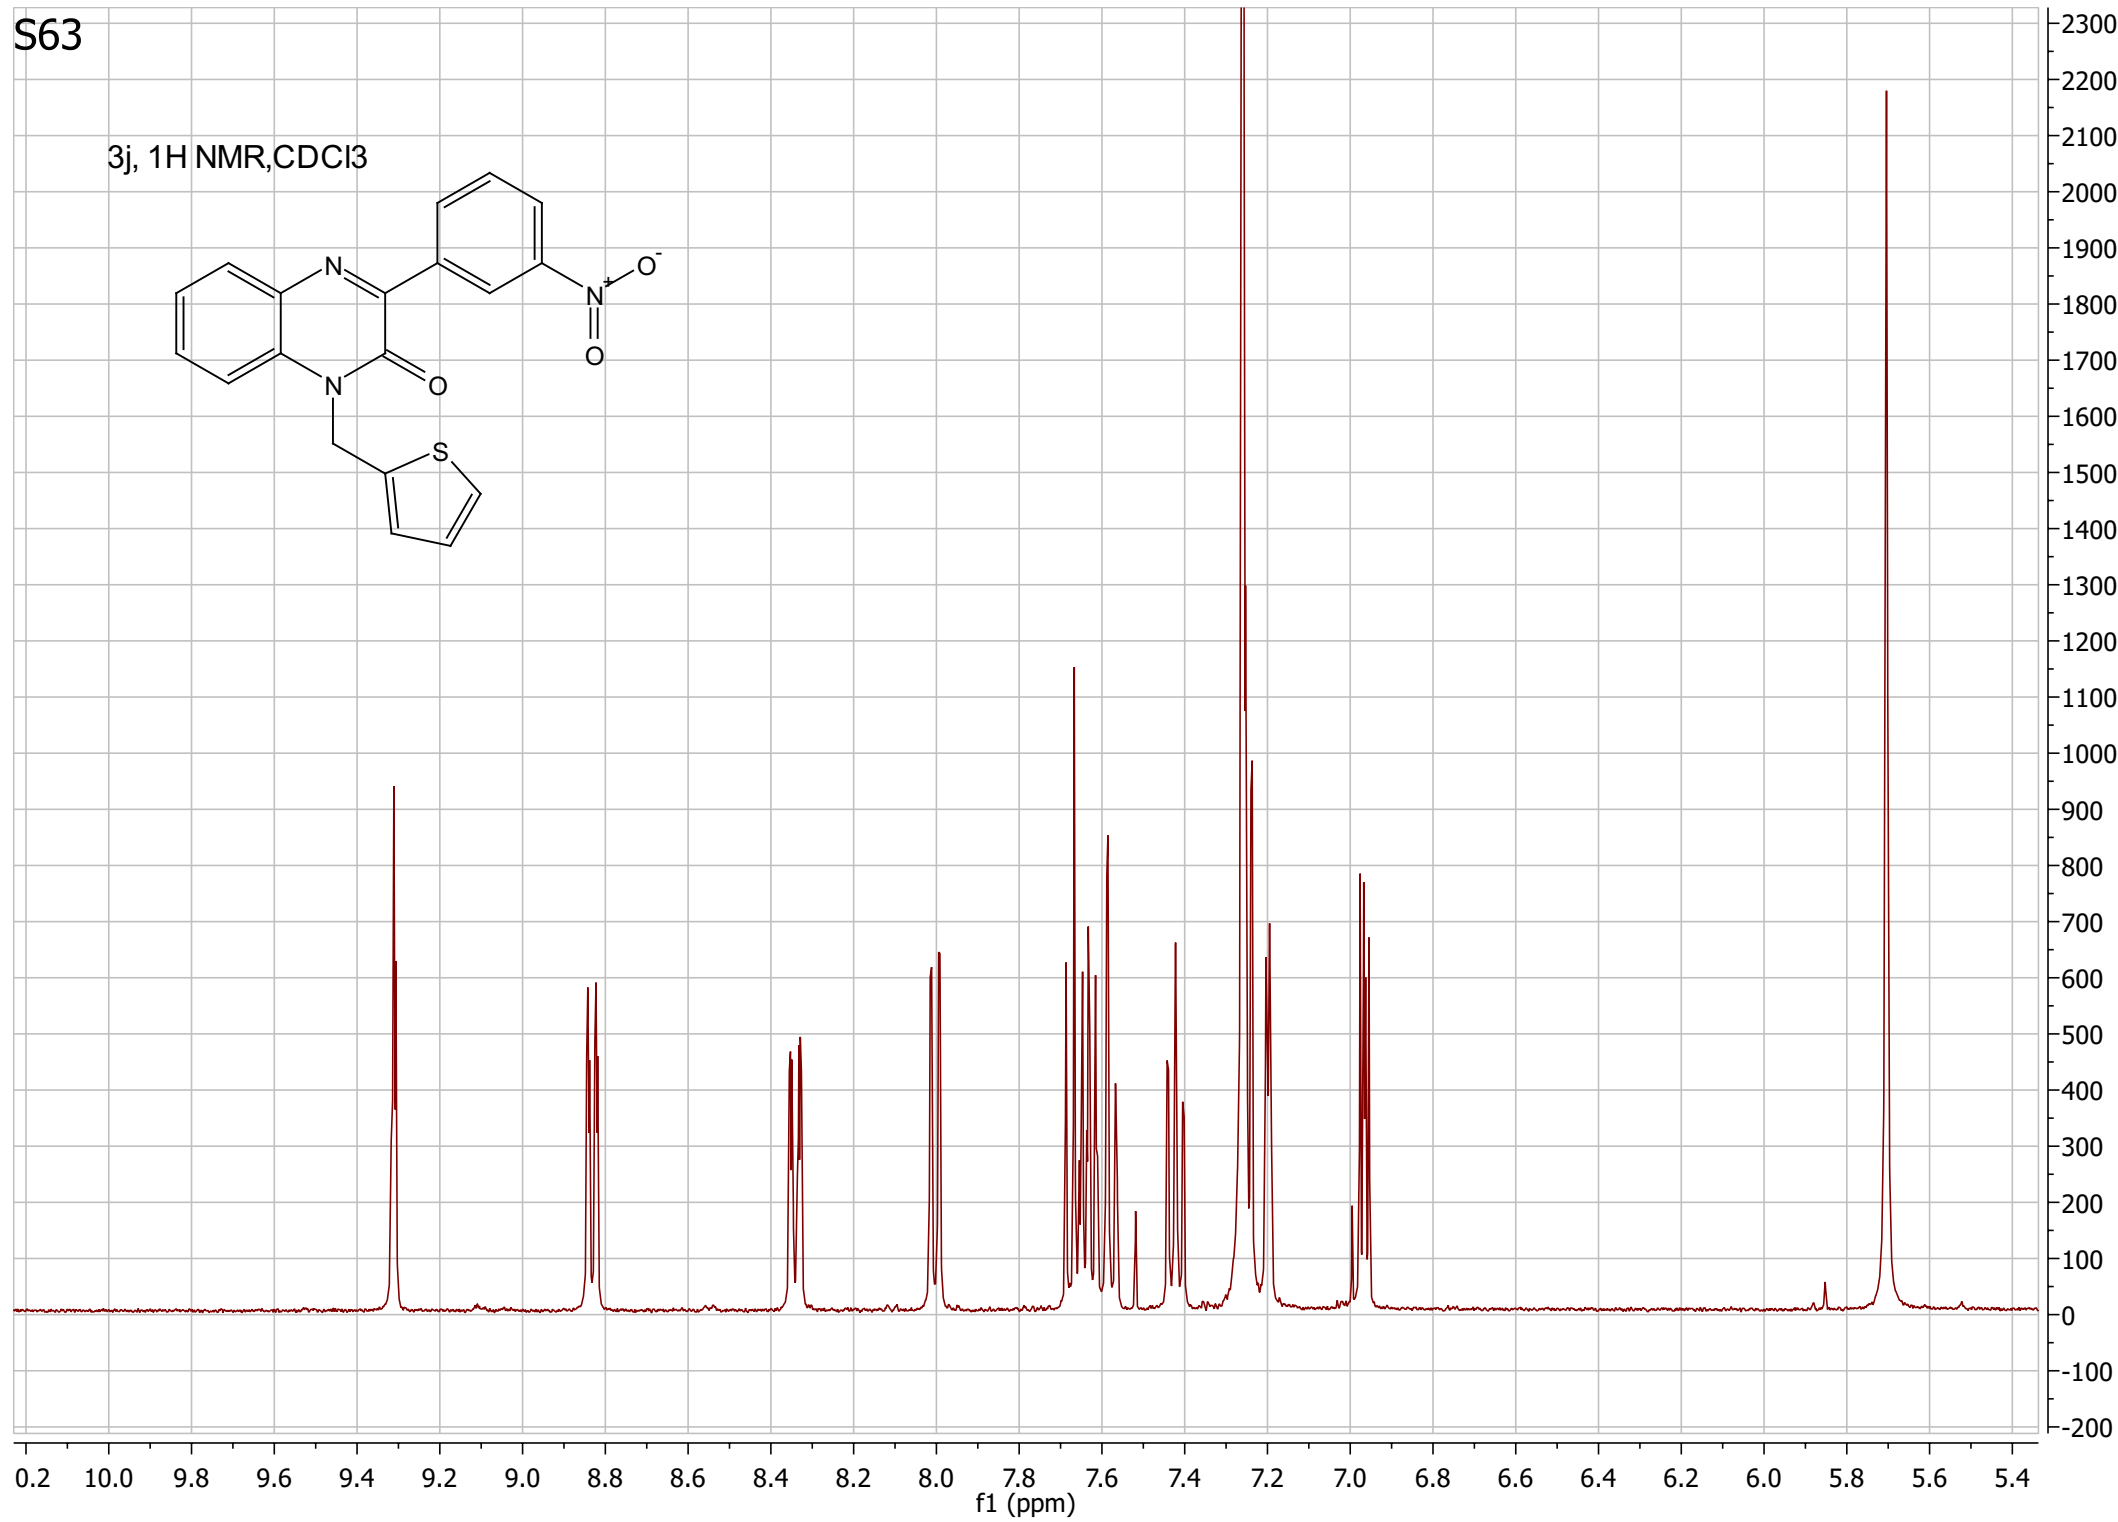

S64

3j, <sup>13</sup>C NMR, CDCl<sub>3</sub>

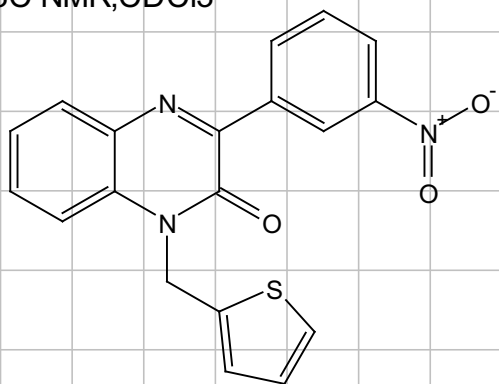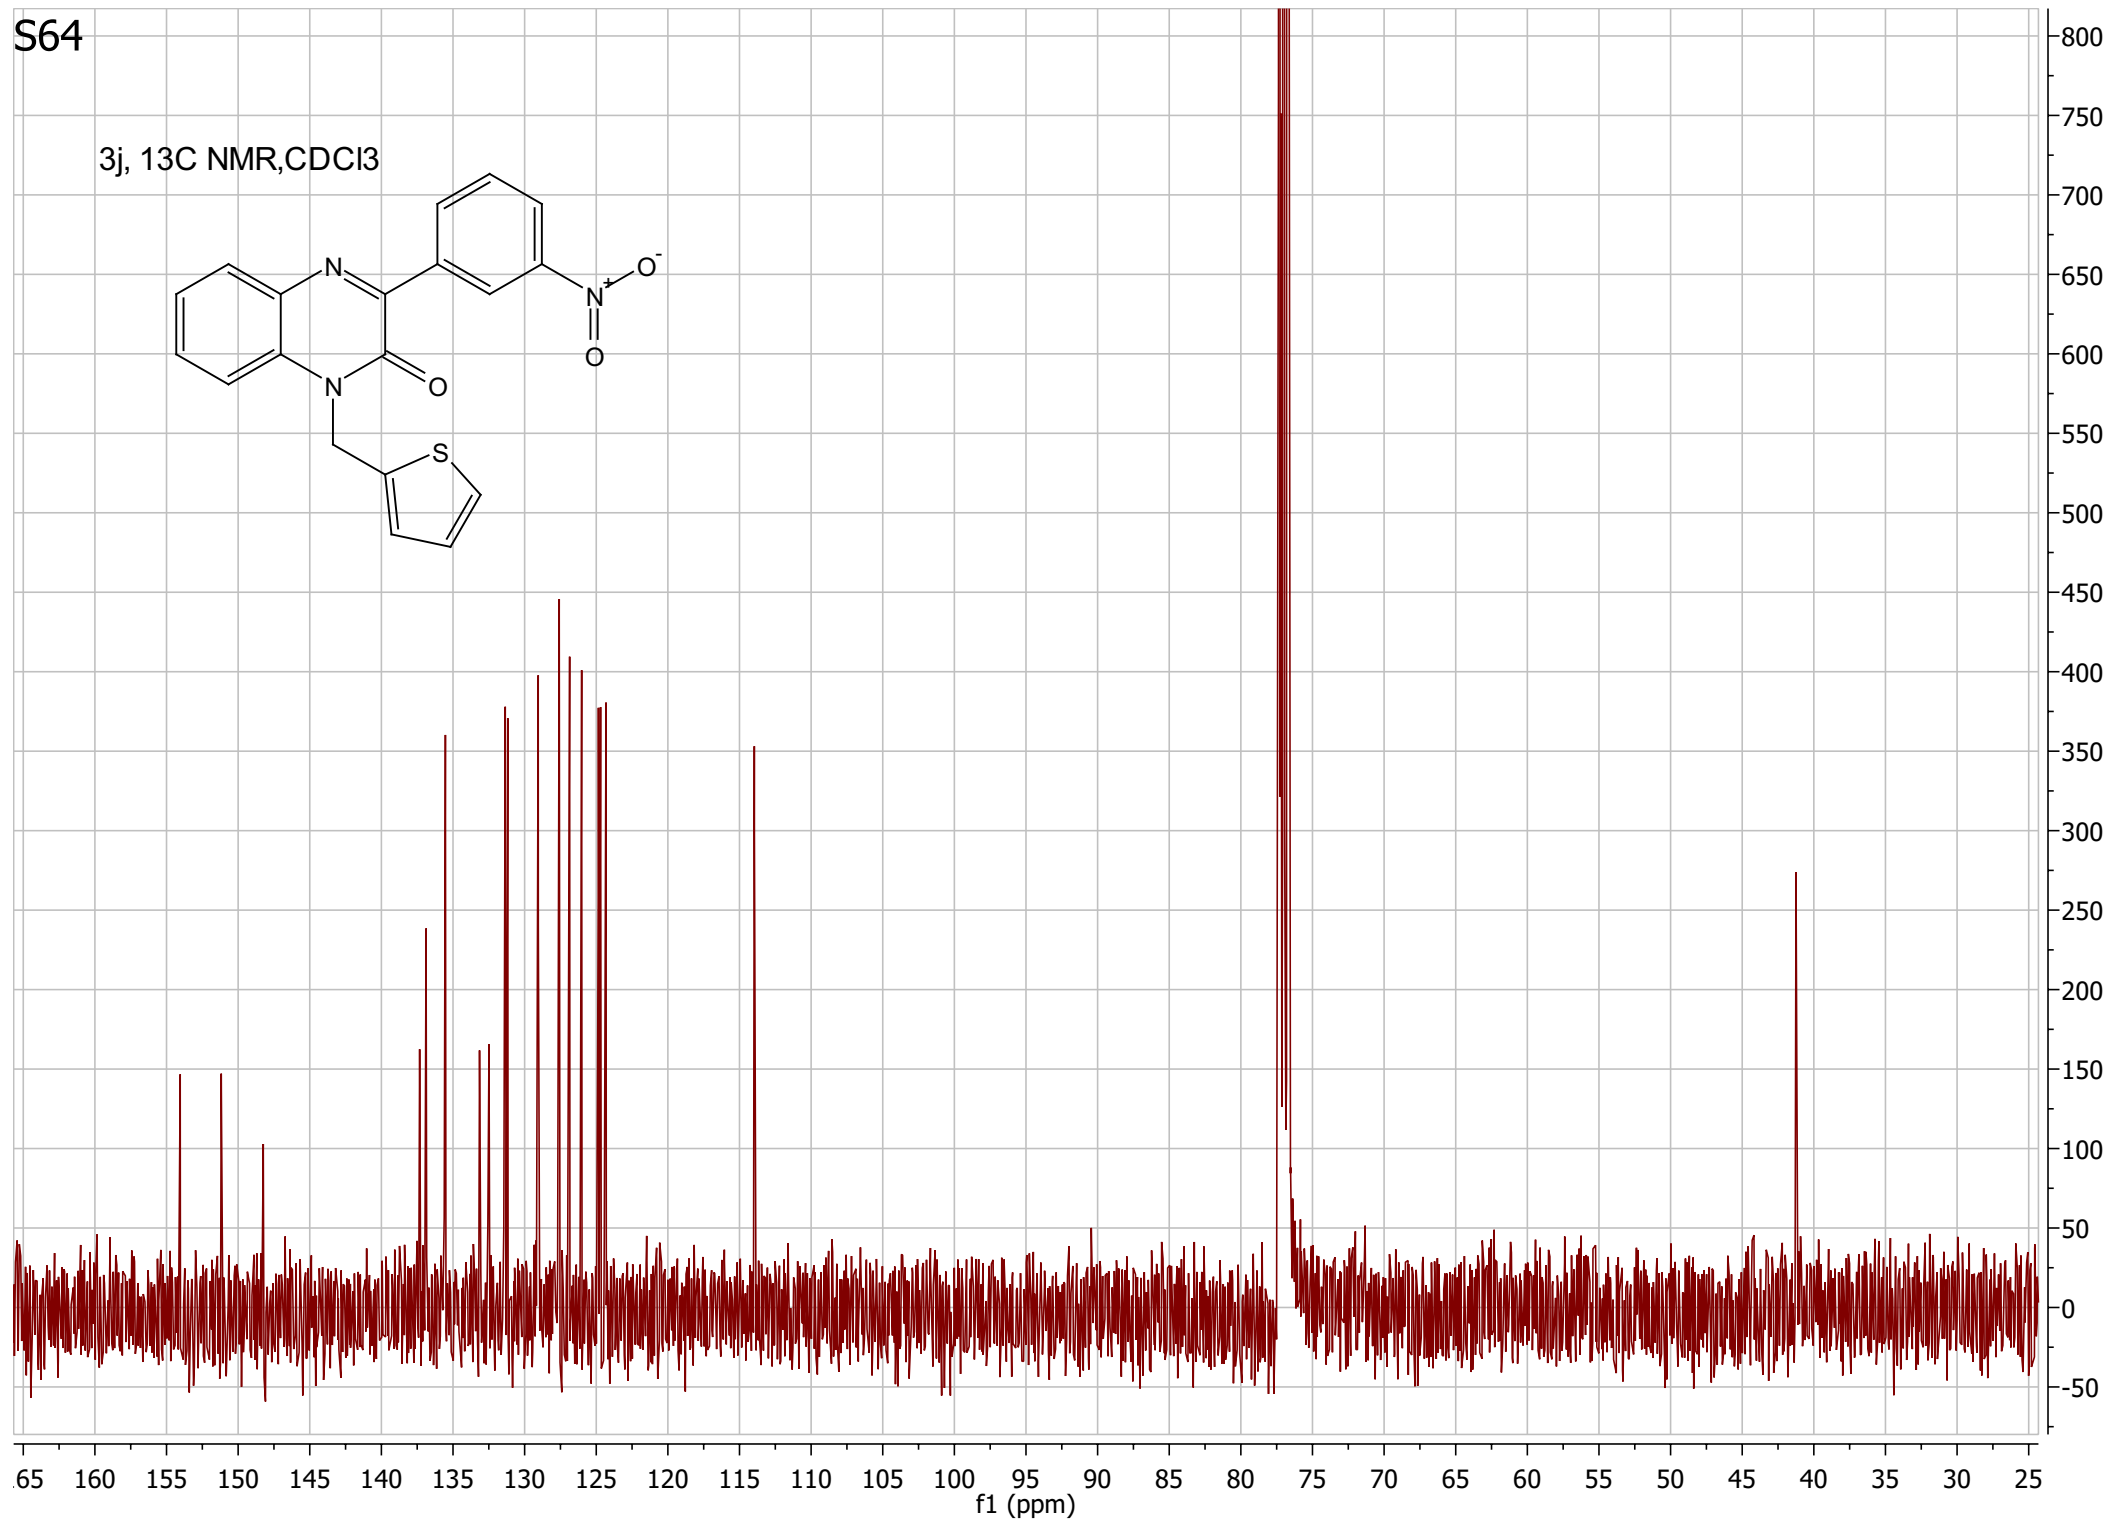



S65

16, 1H NMR, DMSO-d6

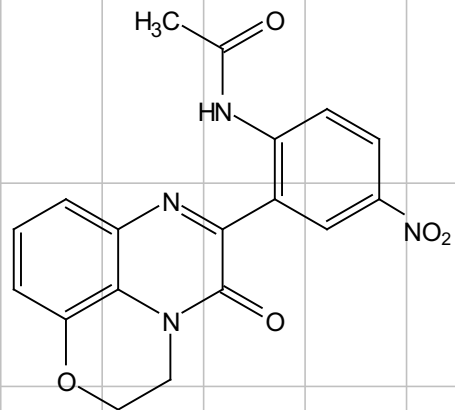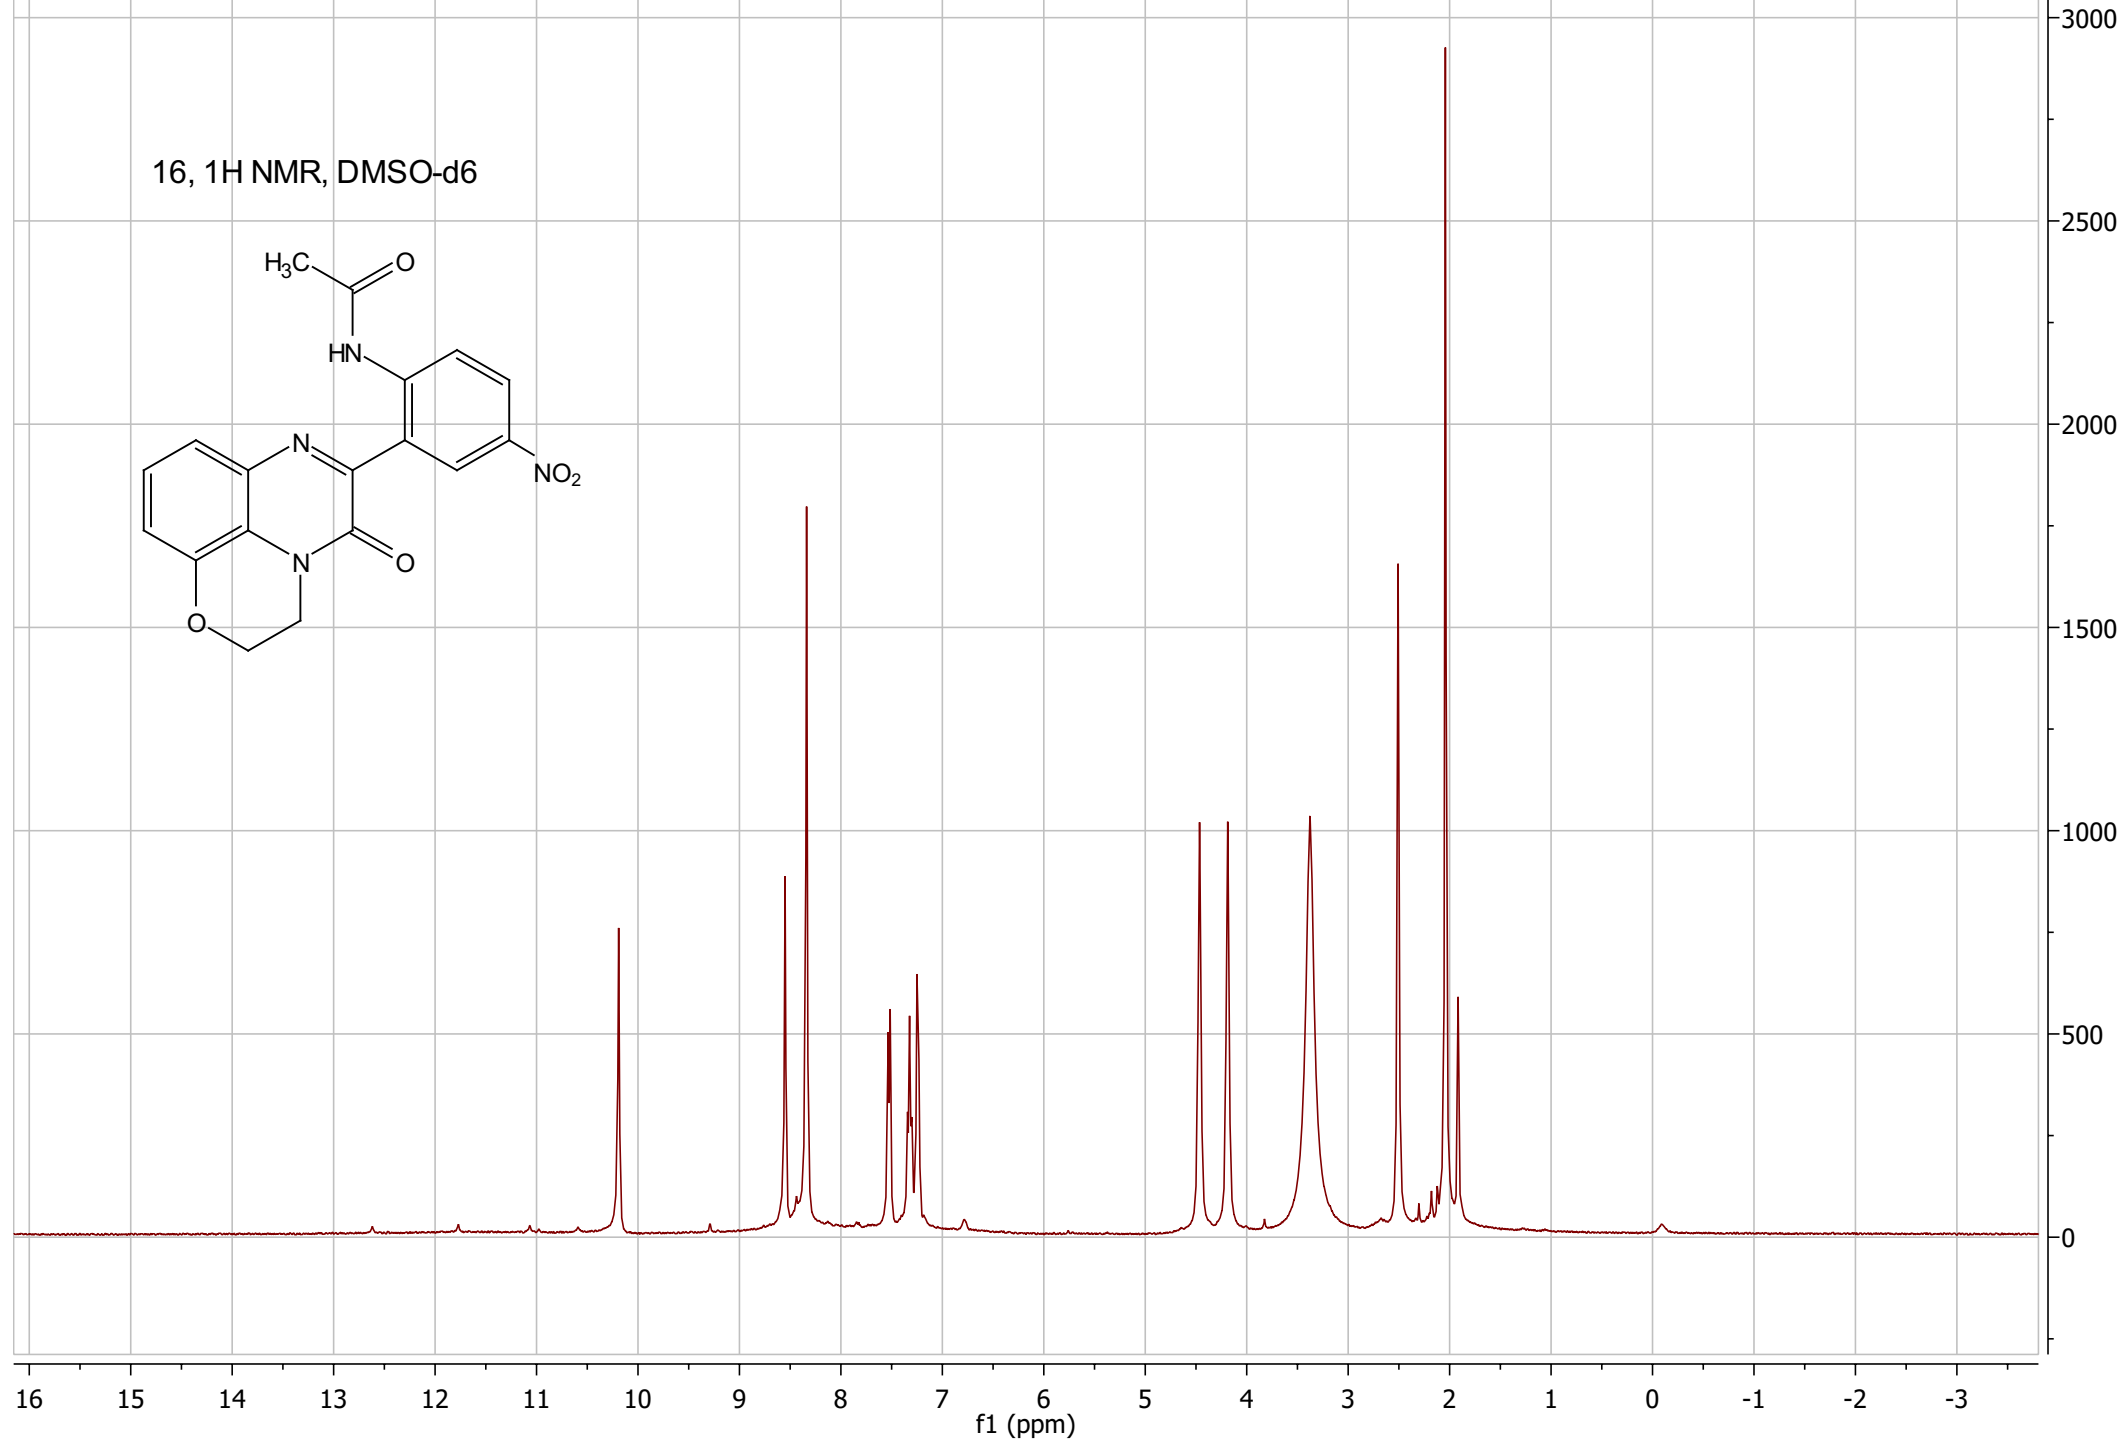

S66

16, <sup>13</sup>C NMR, DMSO-d<sub>6</sub>

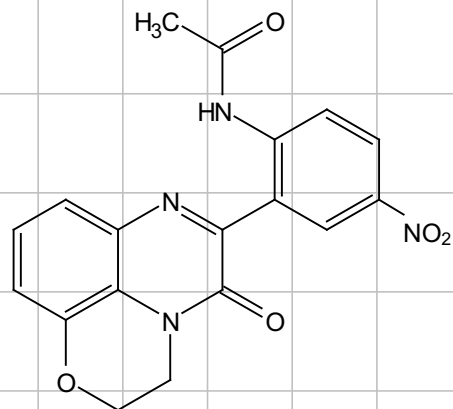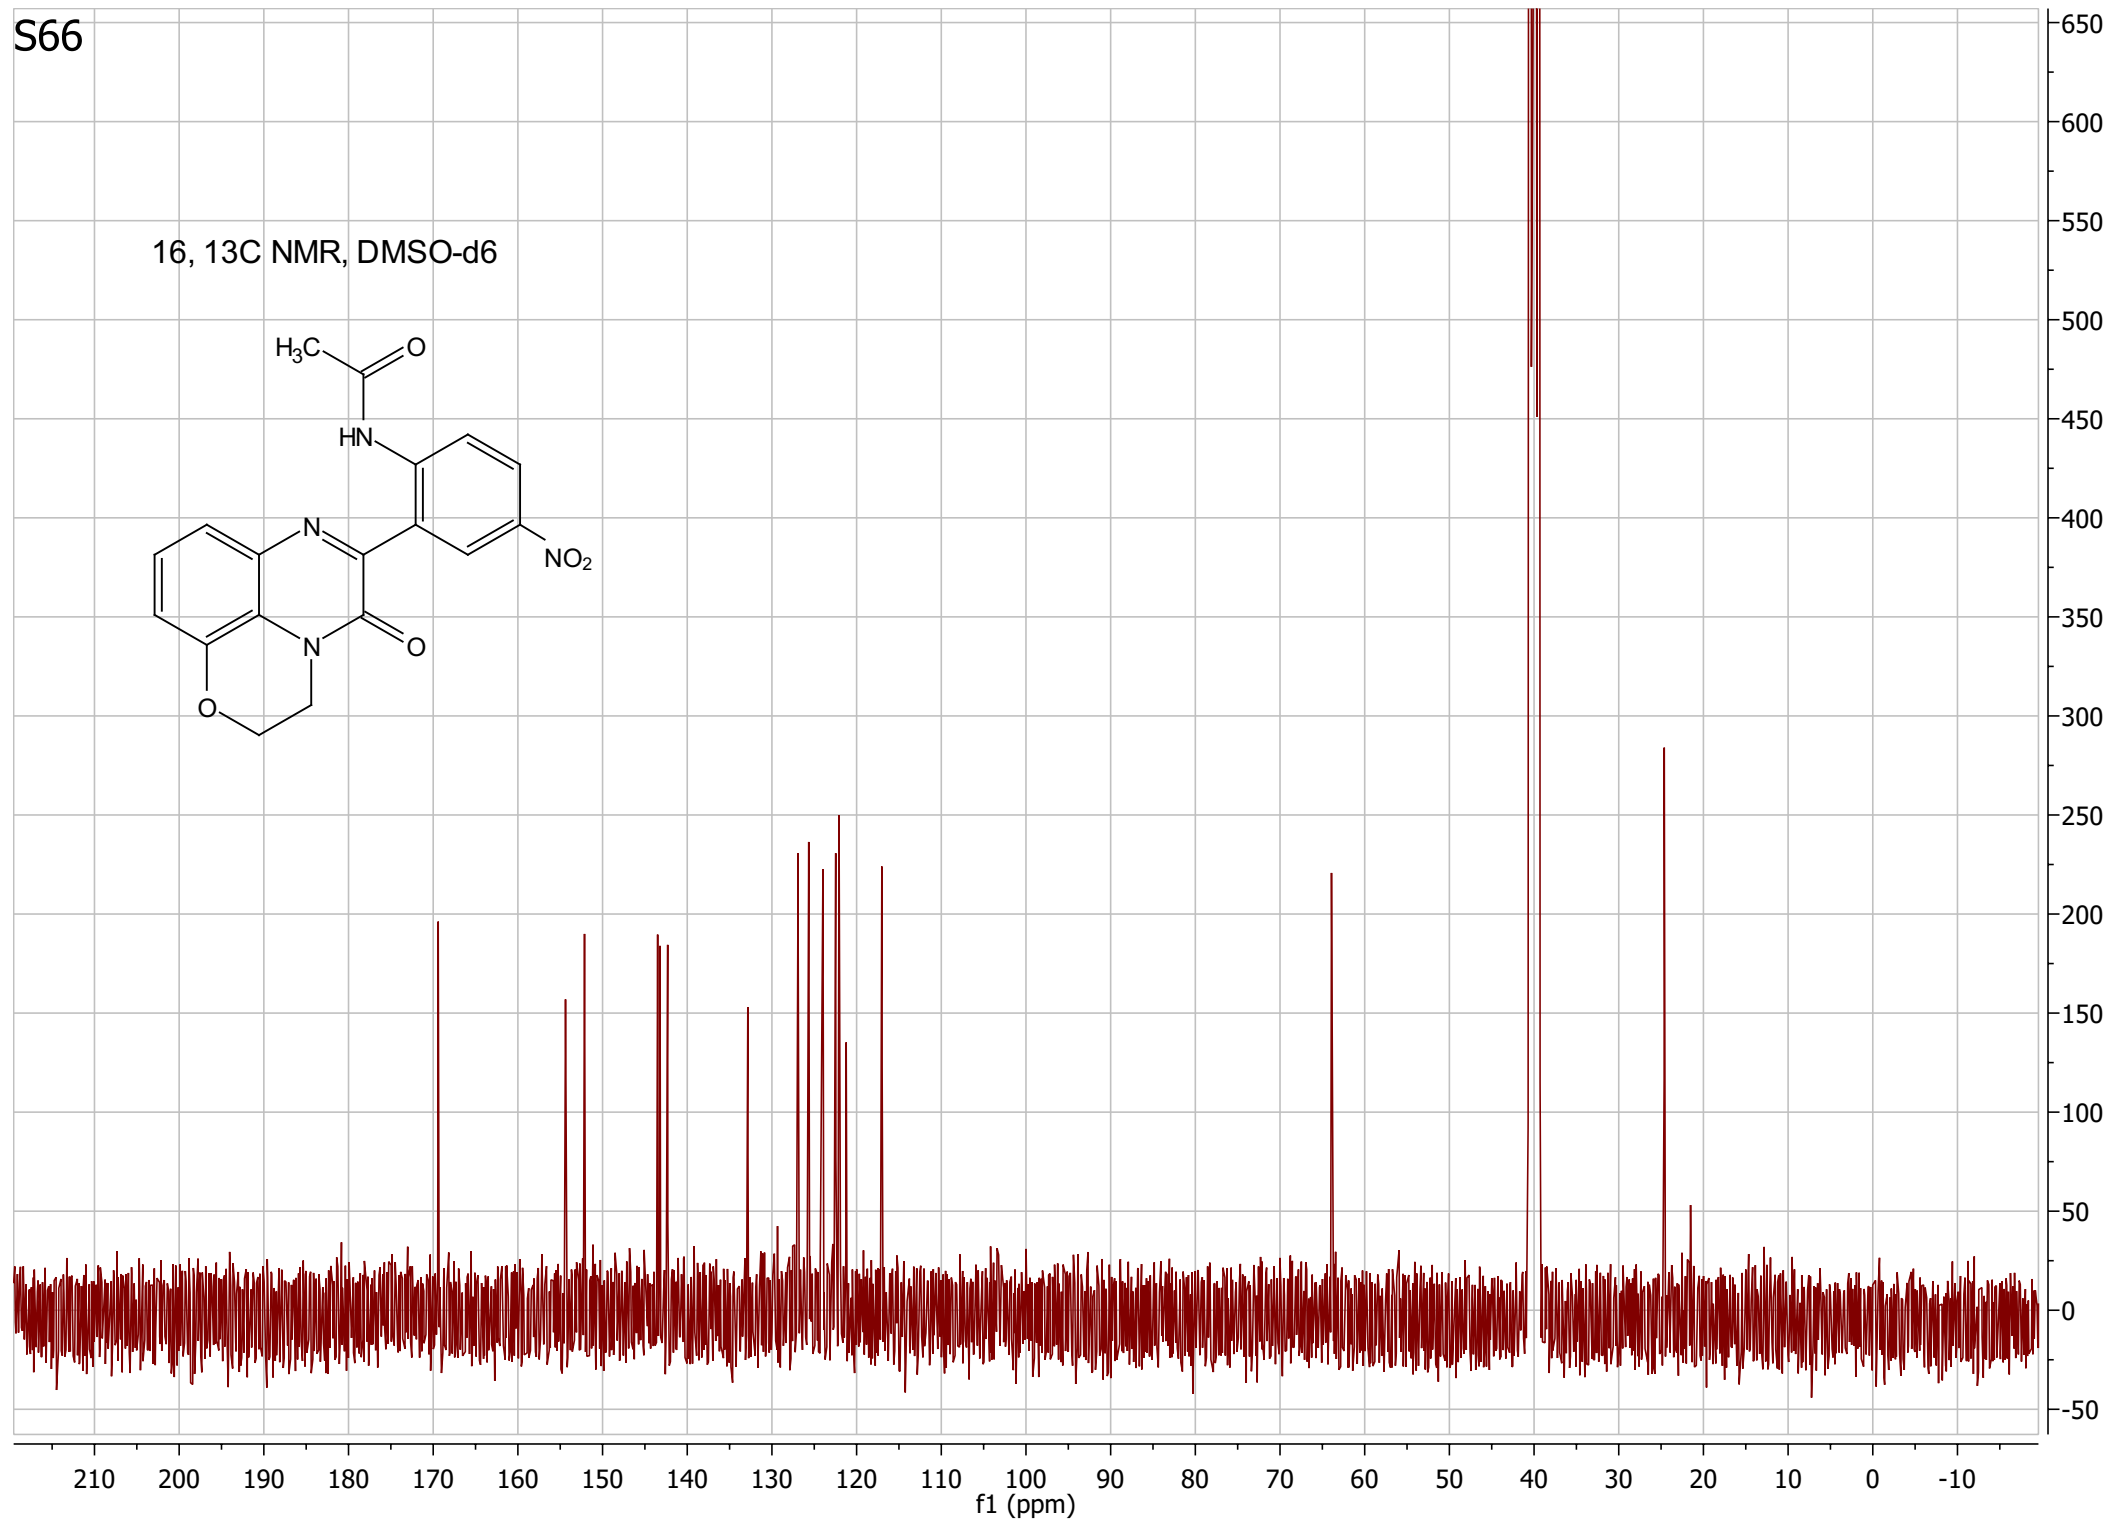

S67

20, <sup>1</sup>H NMR, DMSO-d<sub>6</sub>

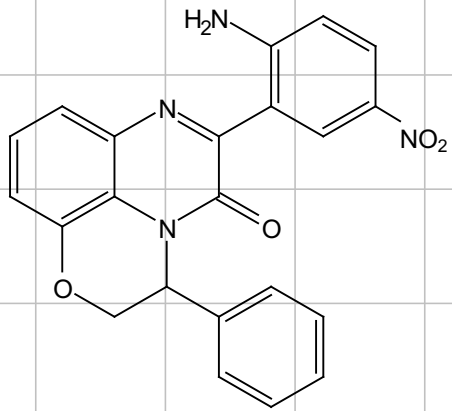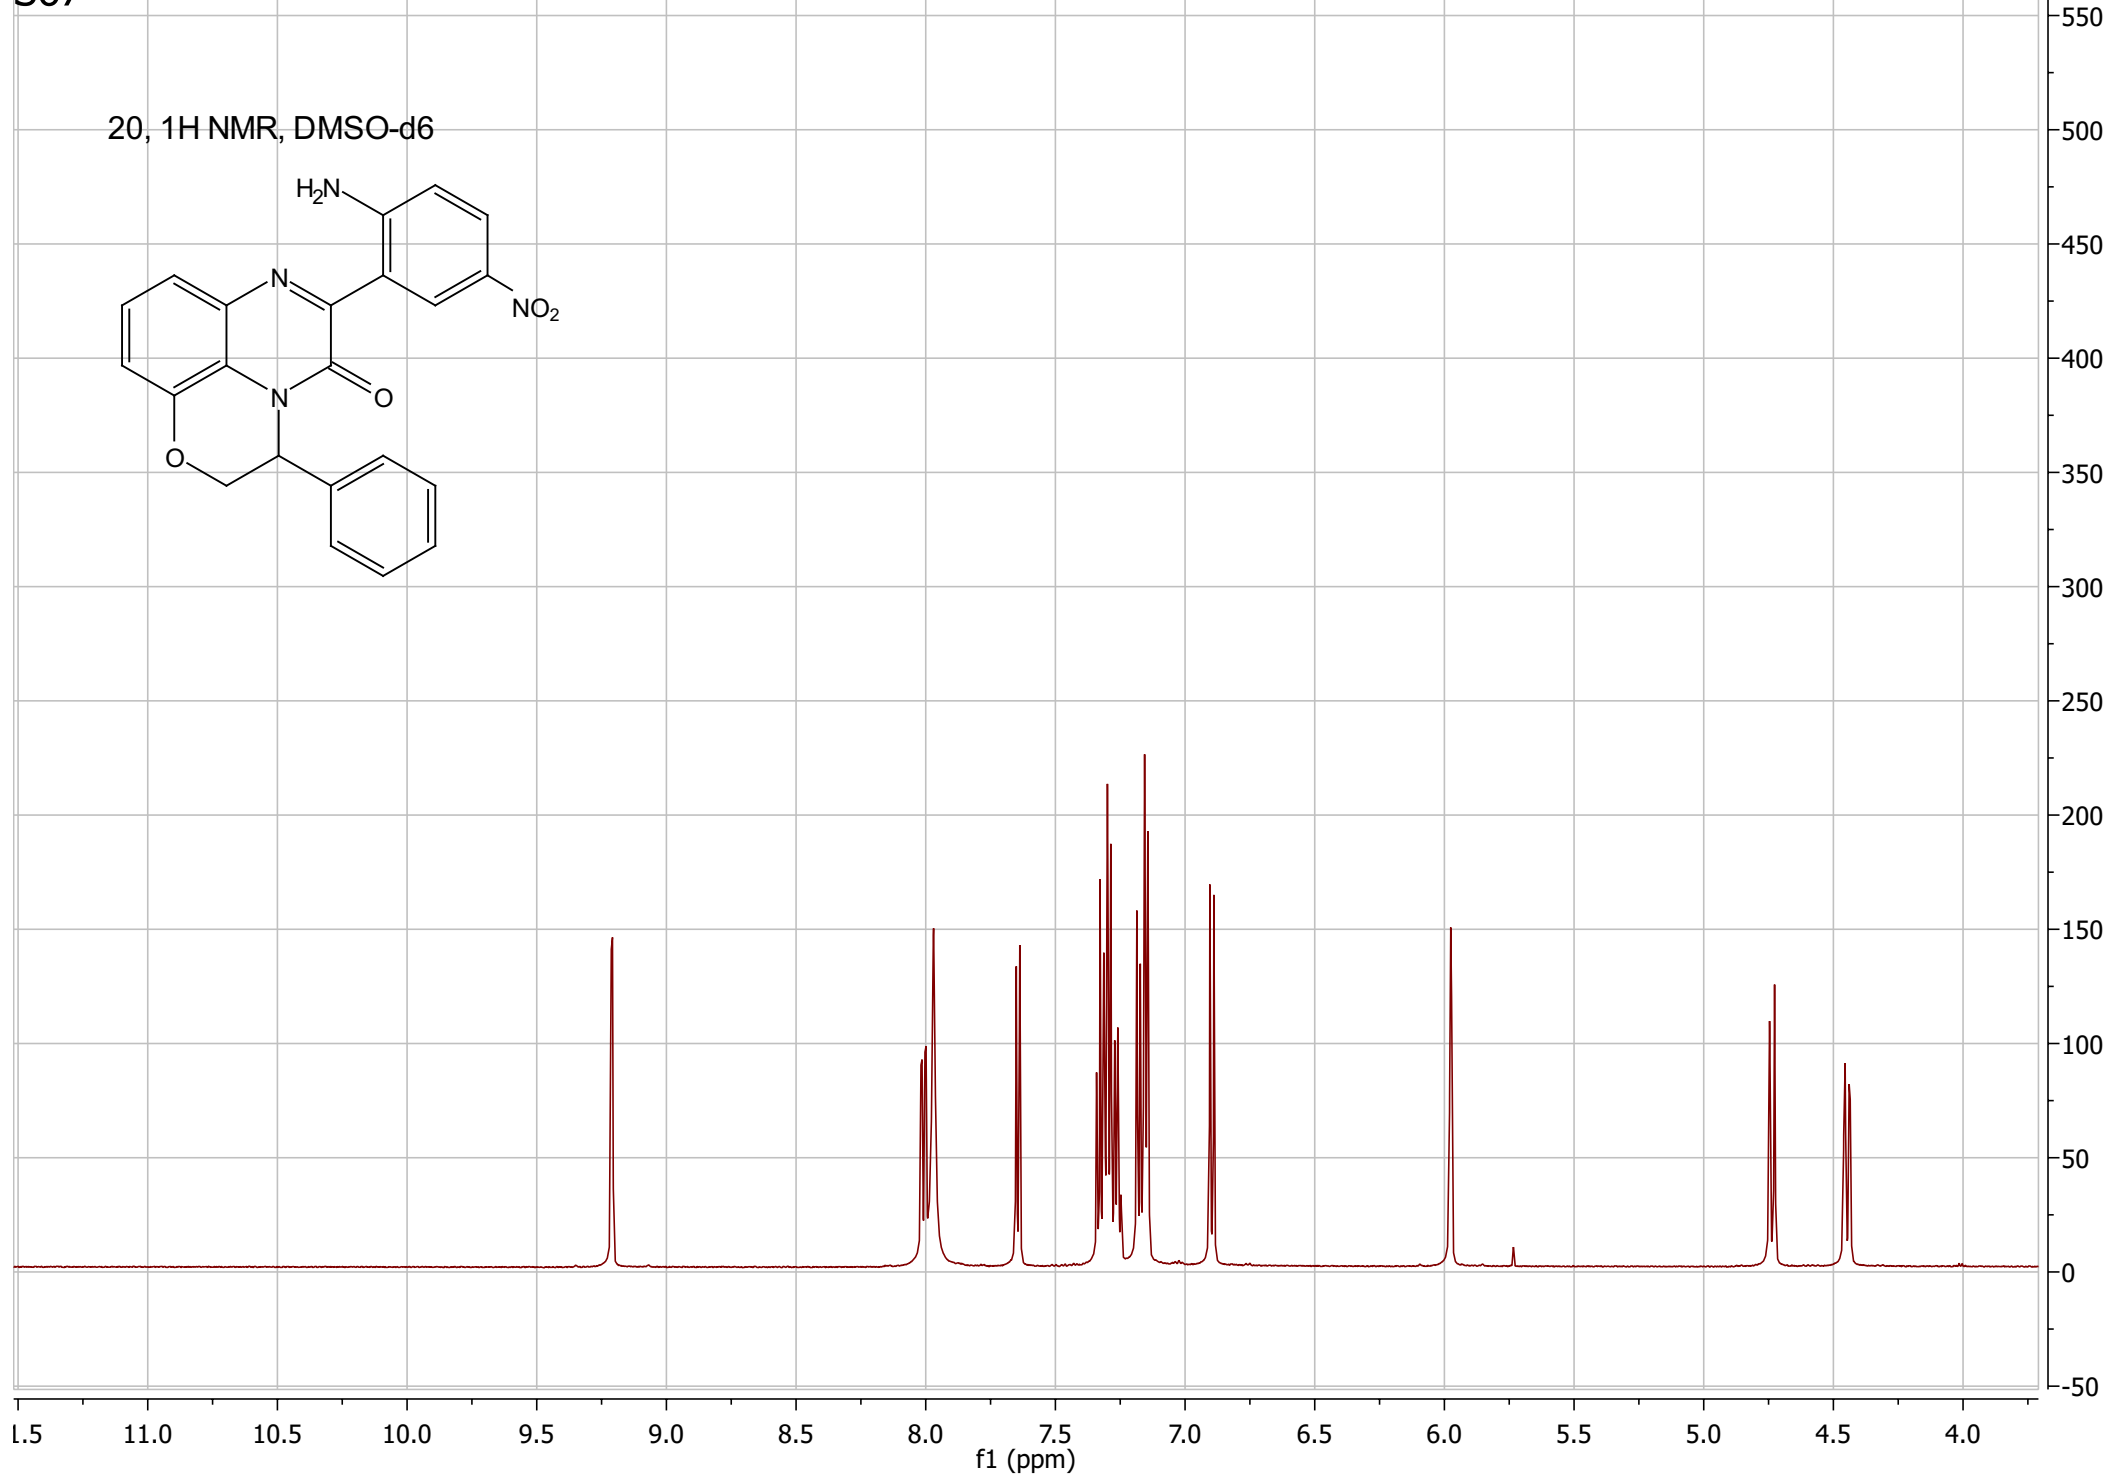

S68

20, <sup>13</sup>C NMR, DMSO-d<sub>6</sub>

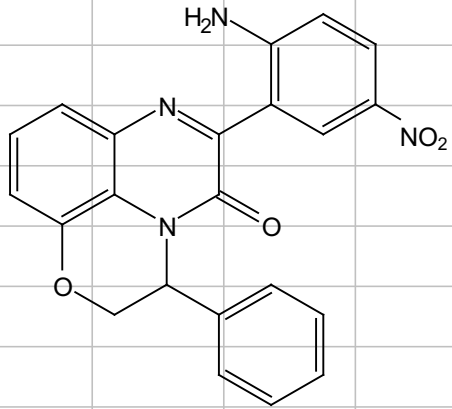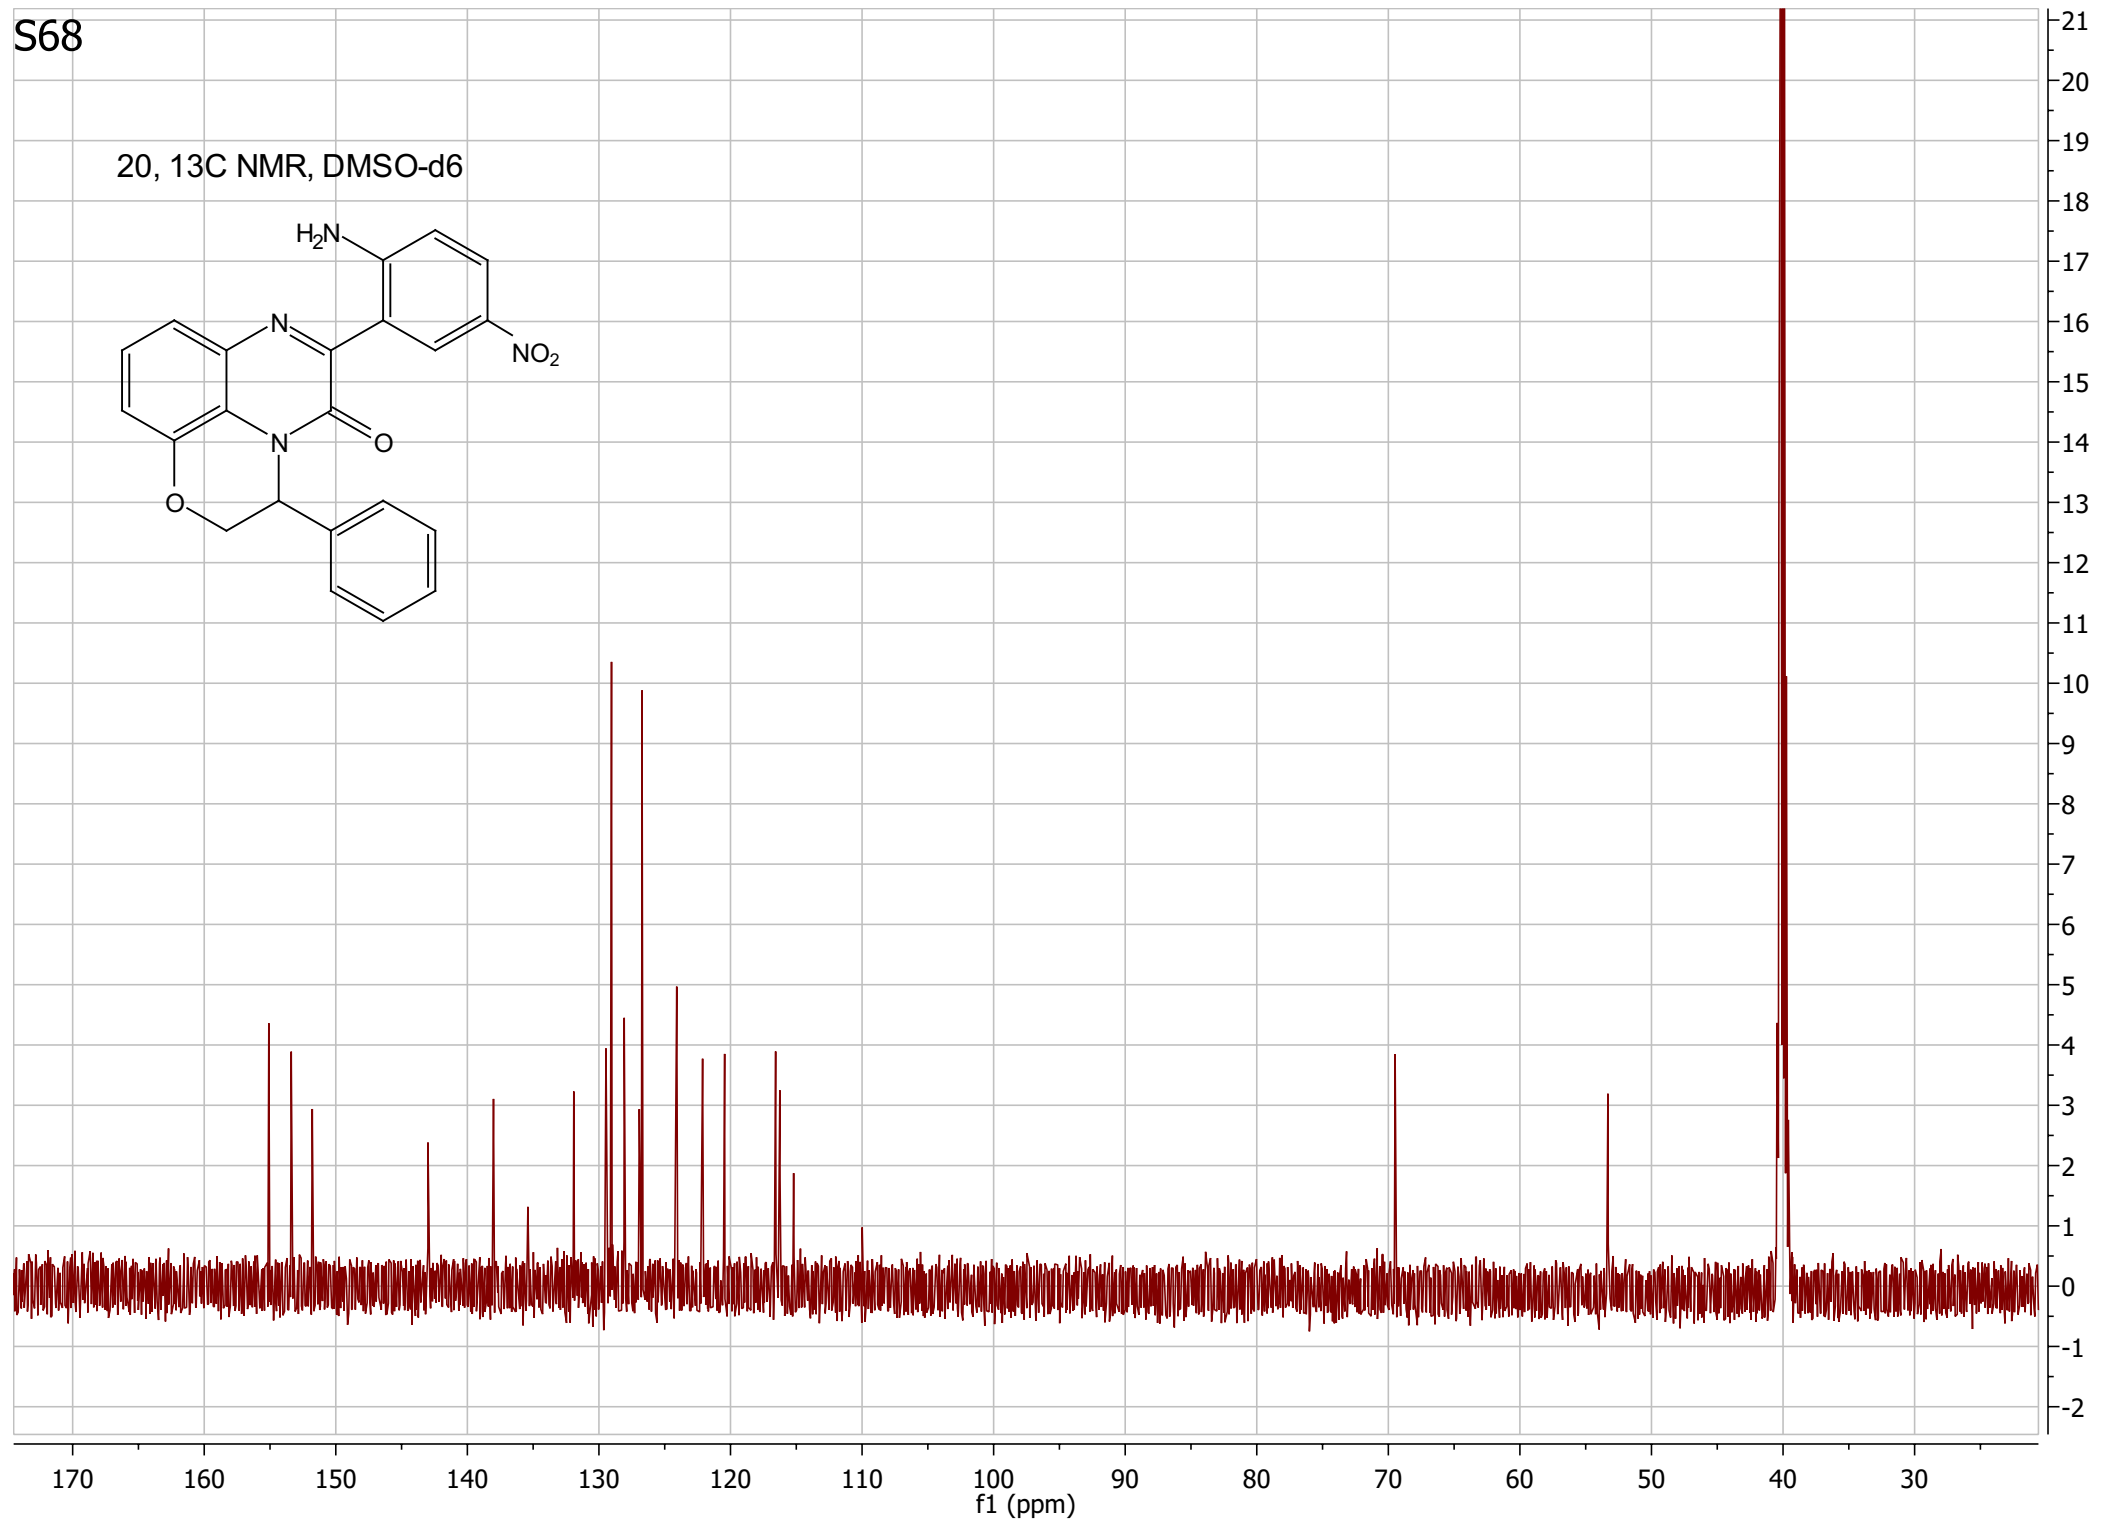

S69

22, <sup>1</sup>H NMR, CDCl<sub>3</sub>

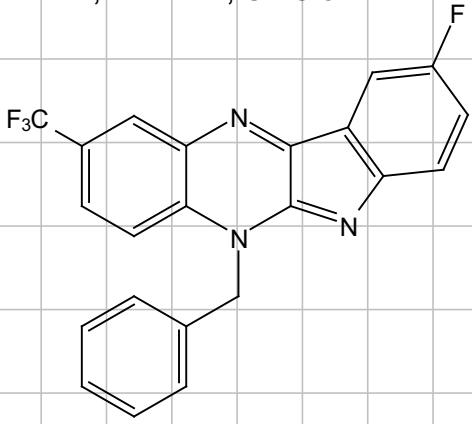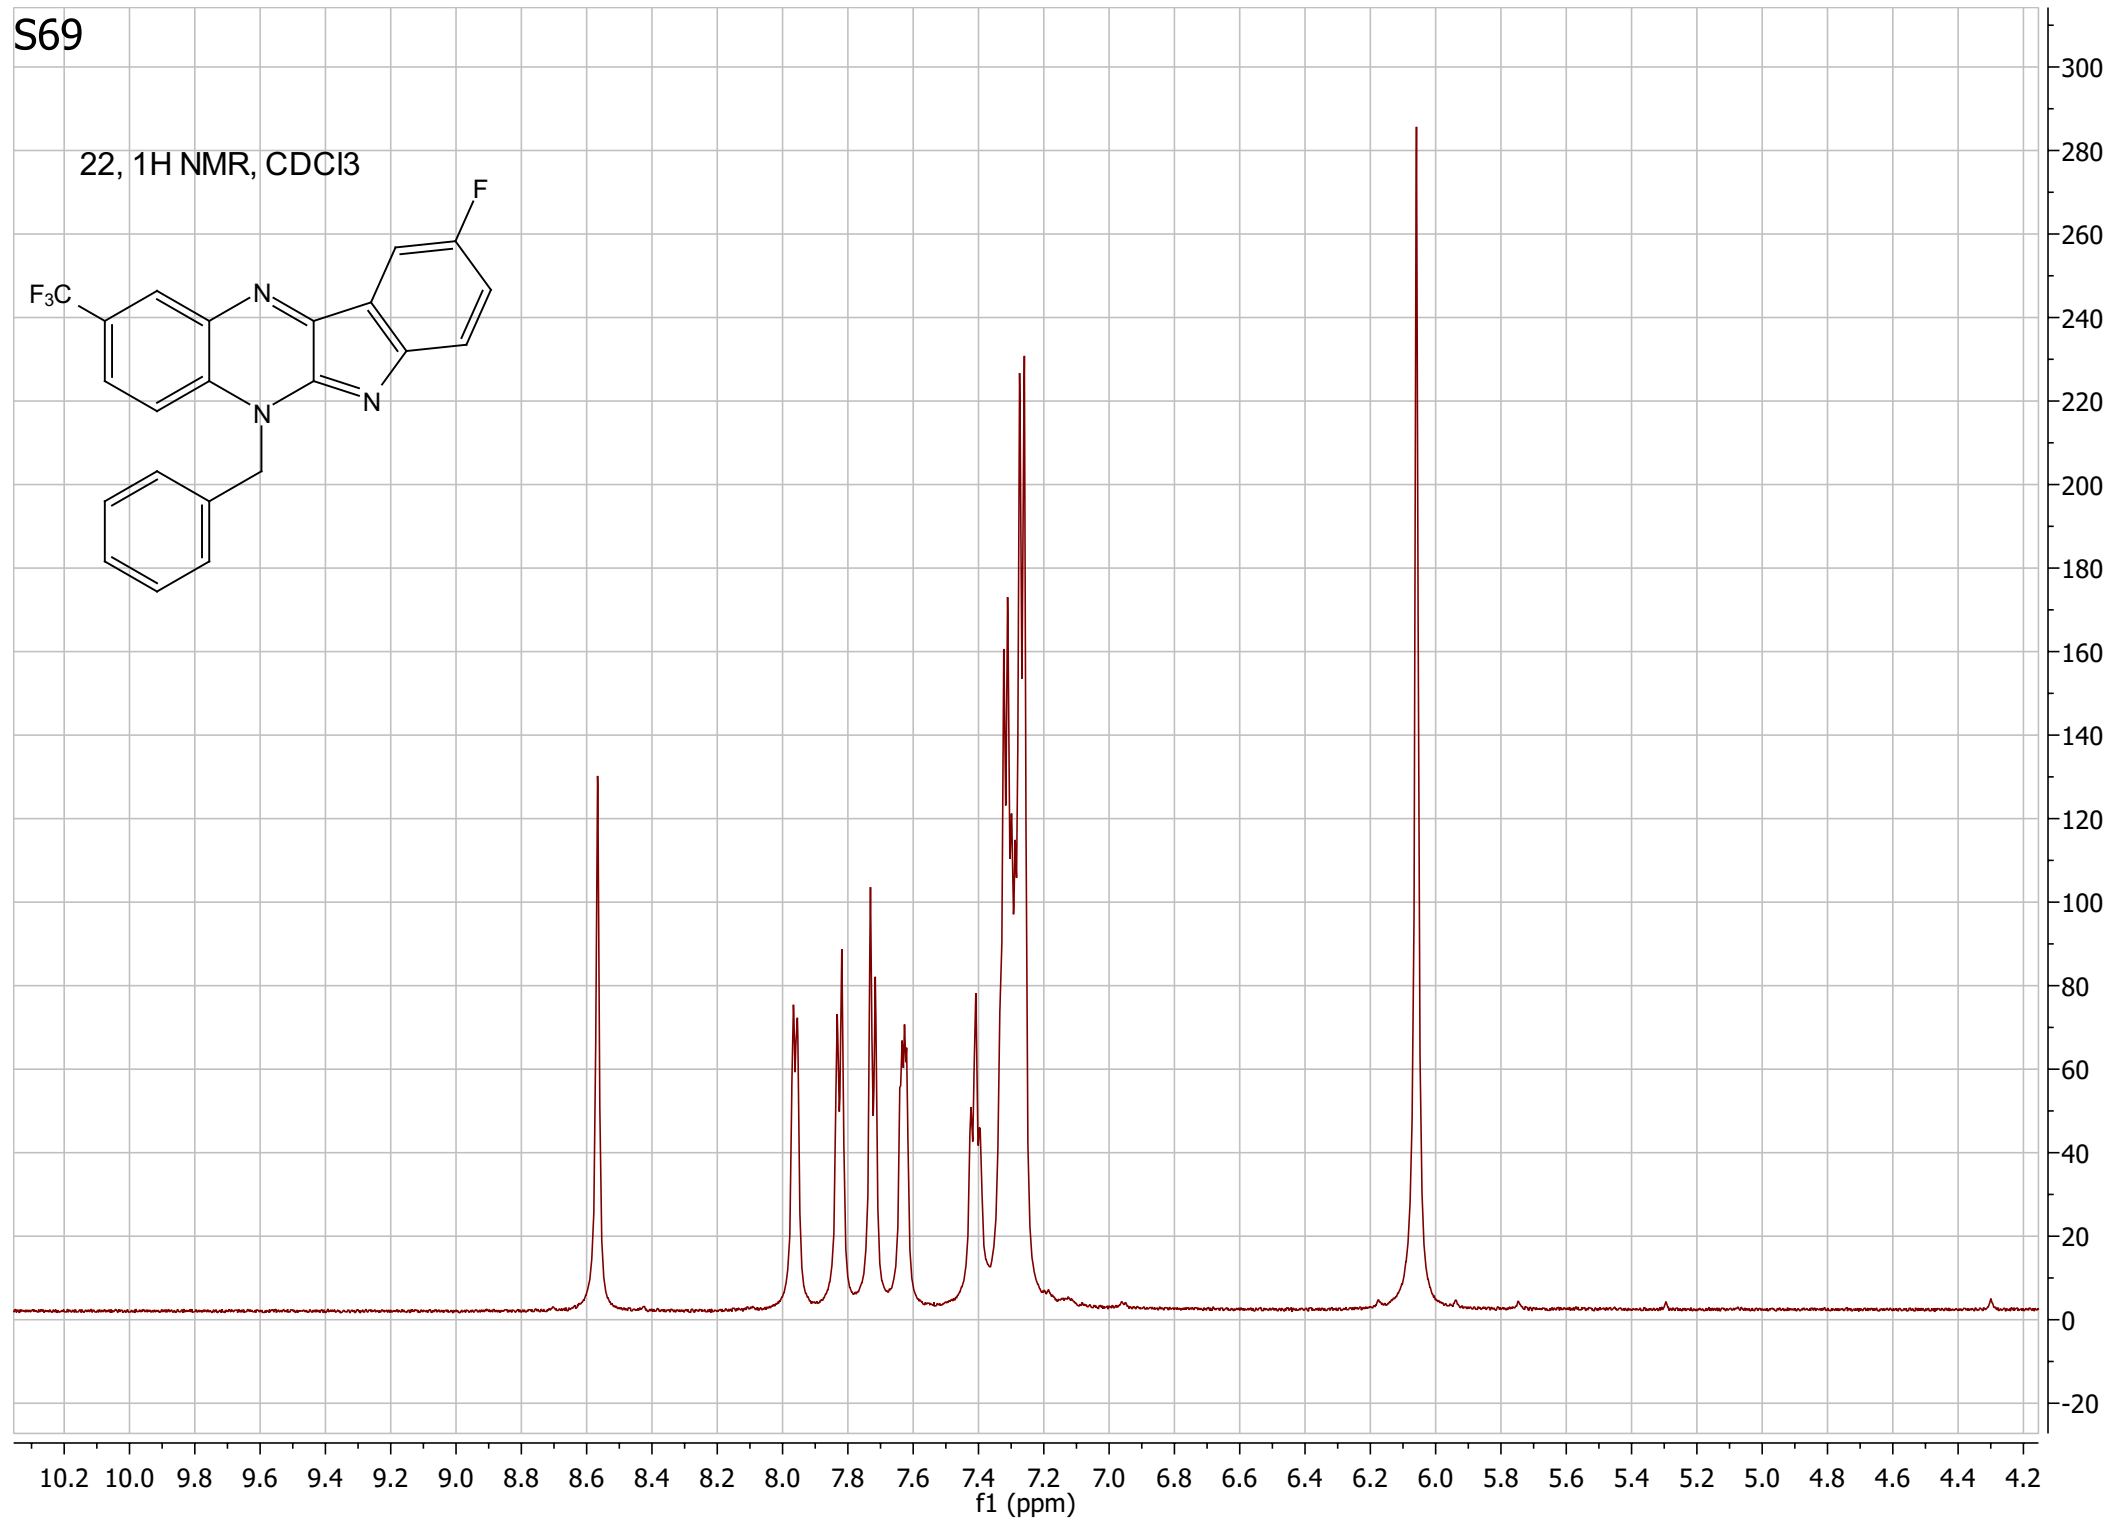

S70

22, <sup>13</sup>C NMR, CDCl<sub>3</sub>

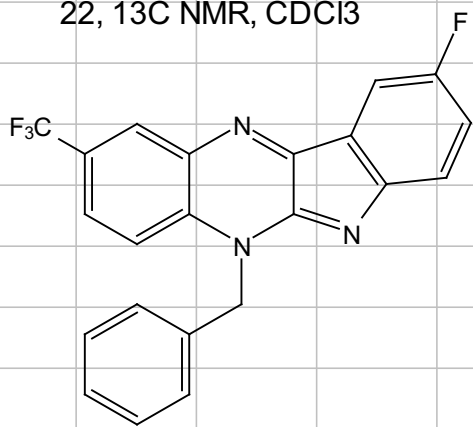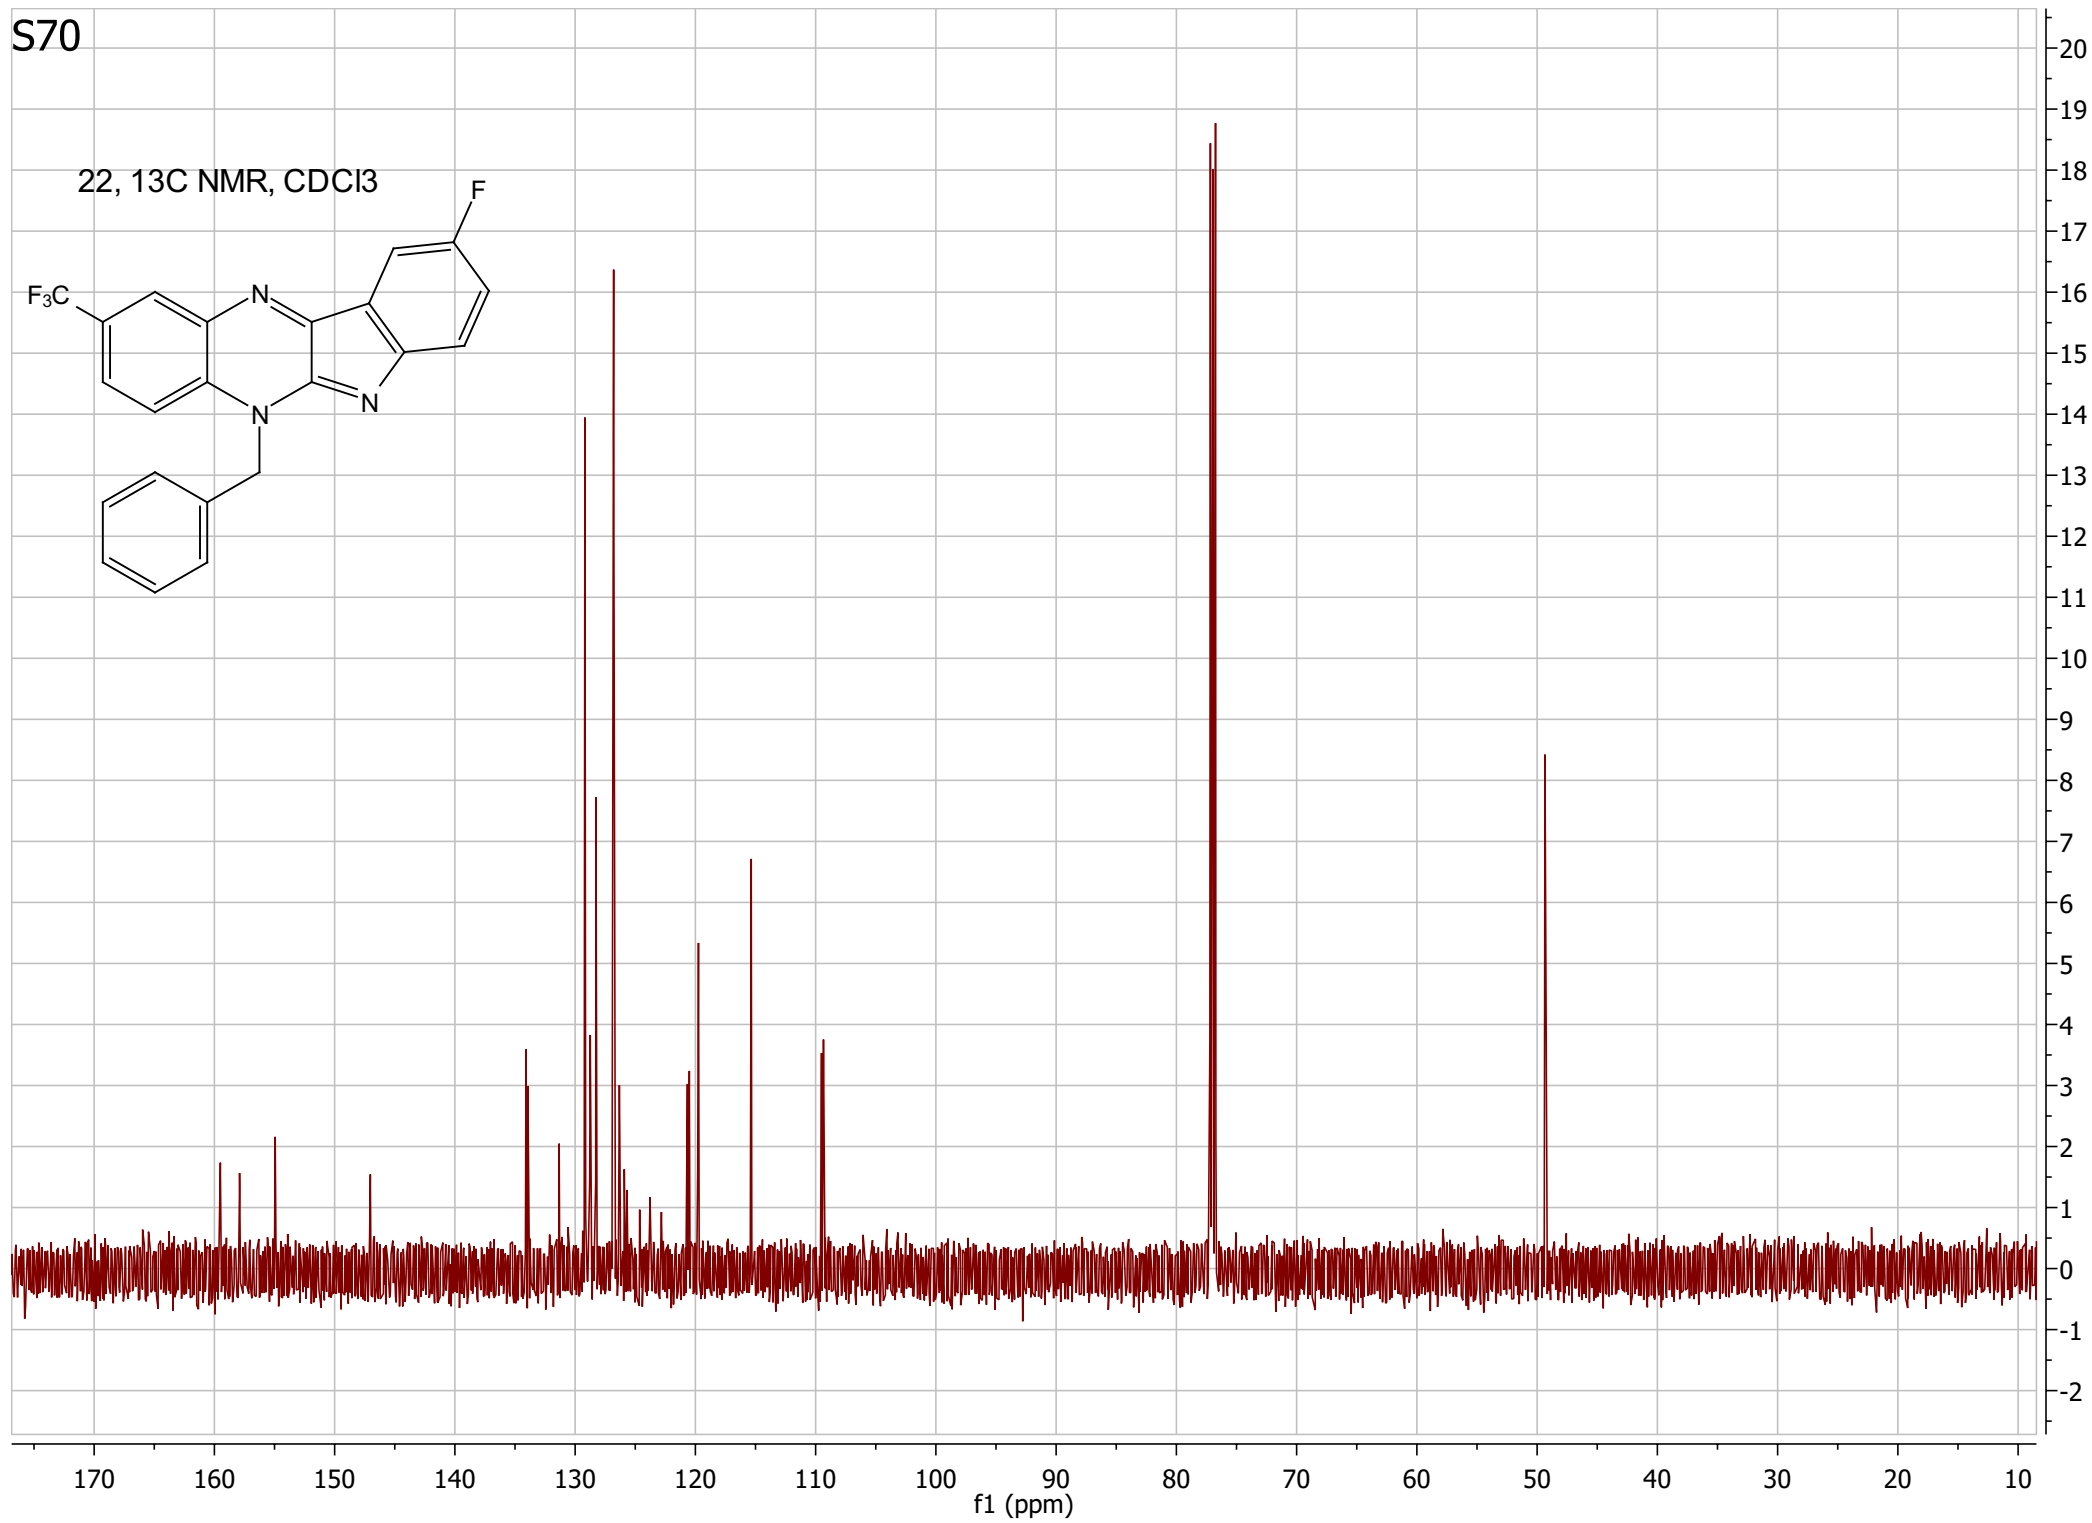

S71

23, <sup>1</sup>H NMR, DMSO-d<sub>6</sub>

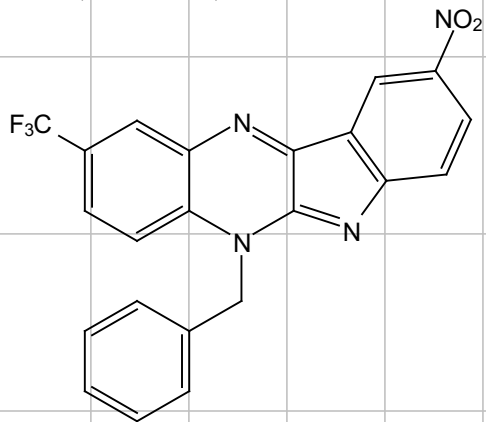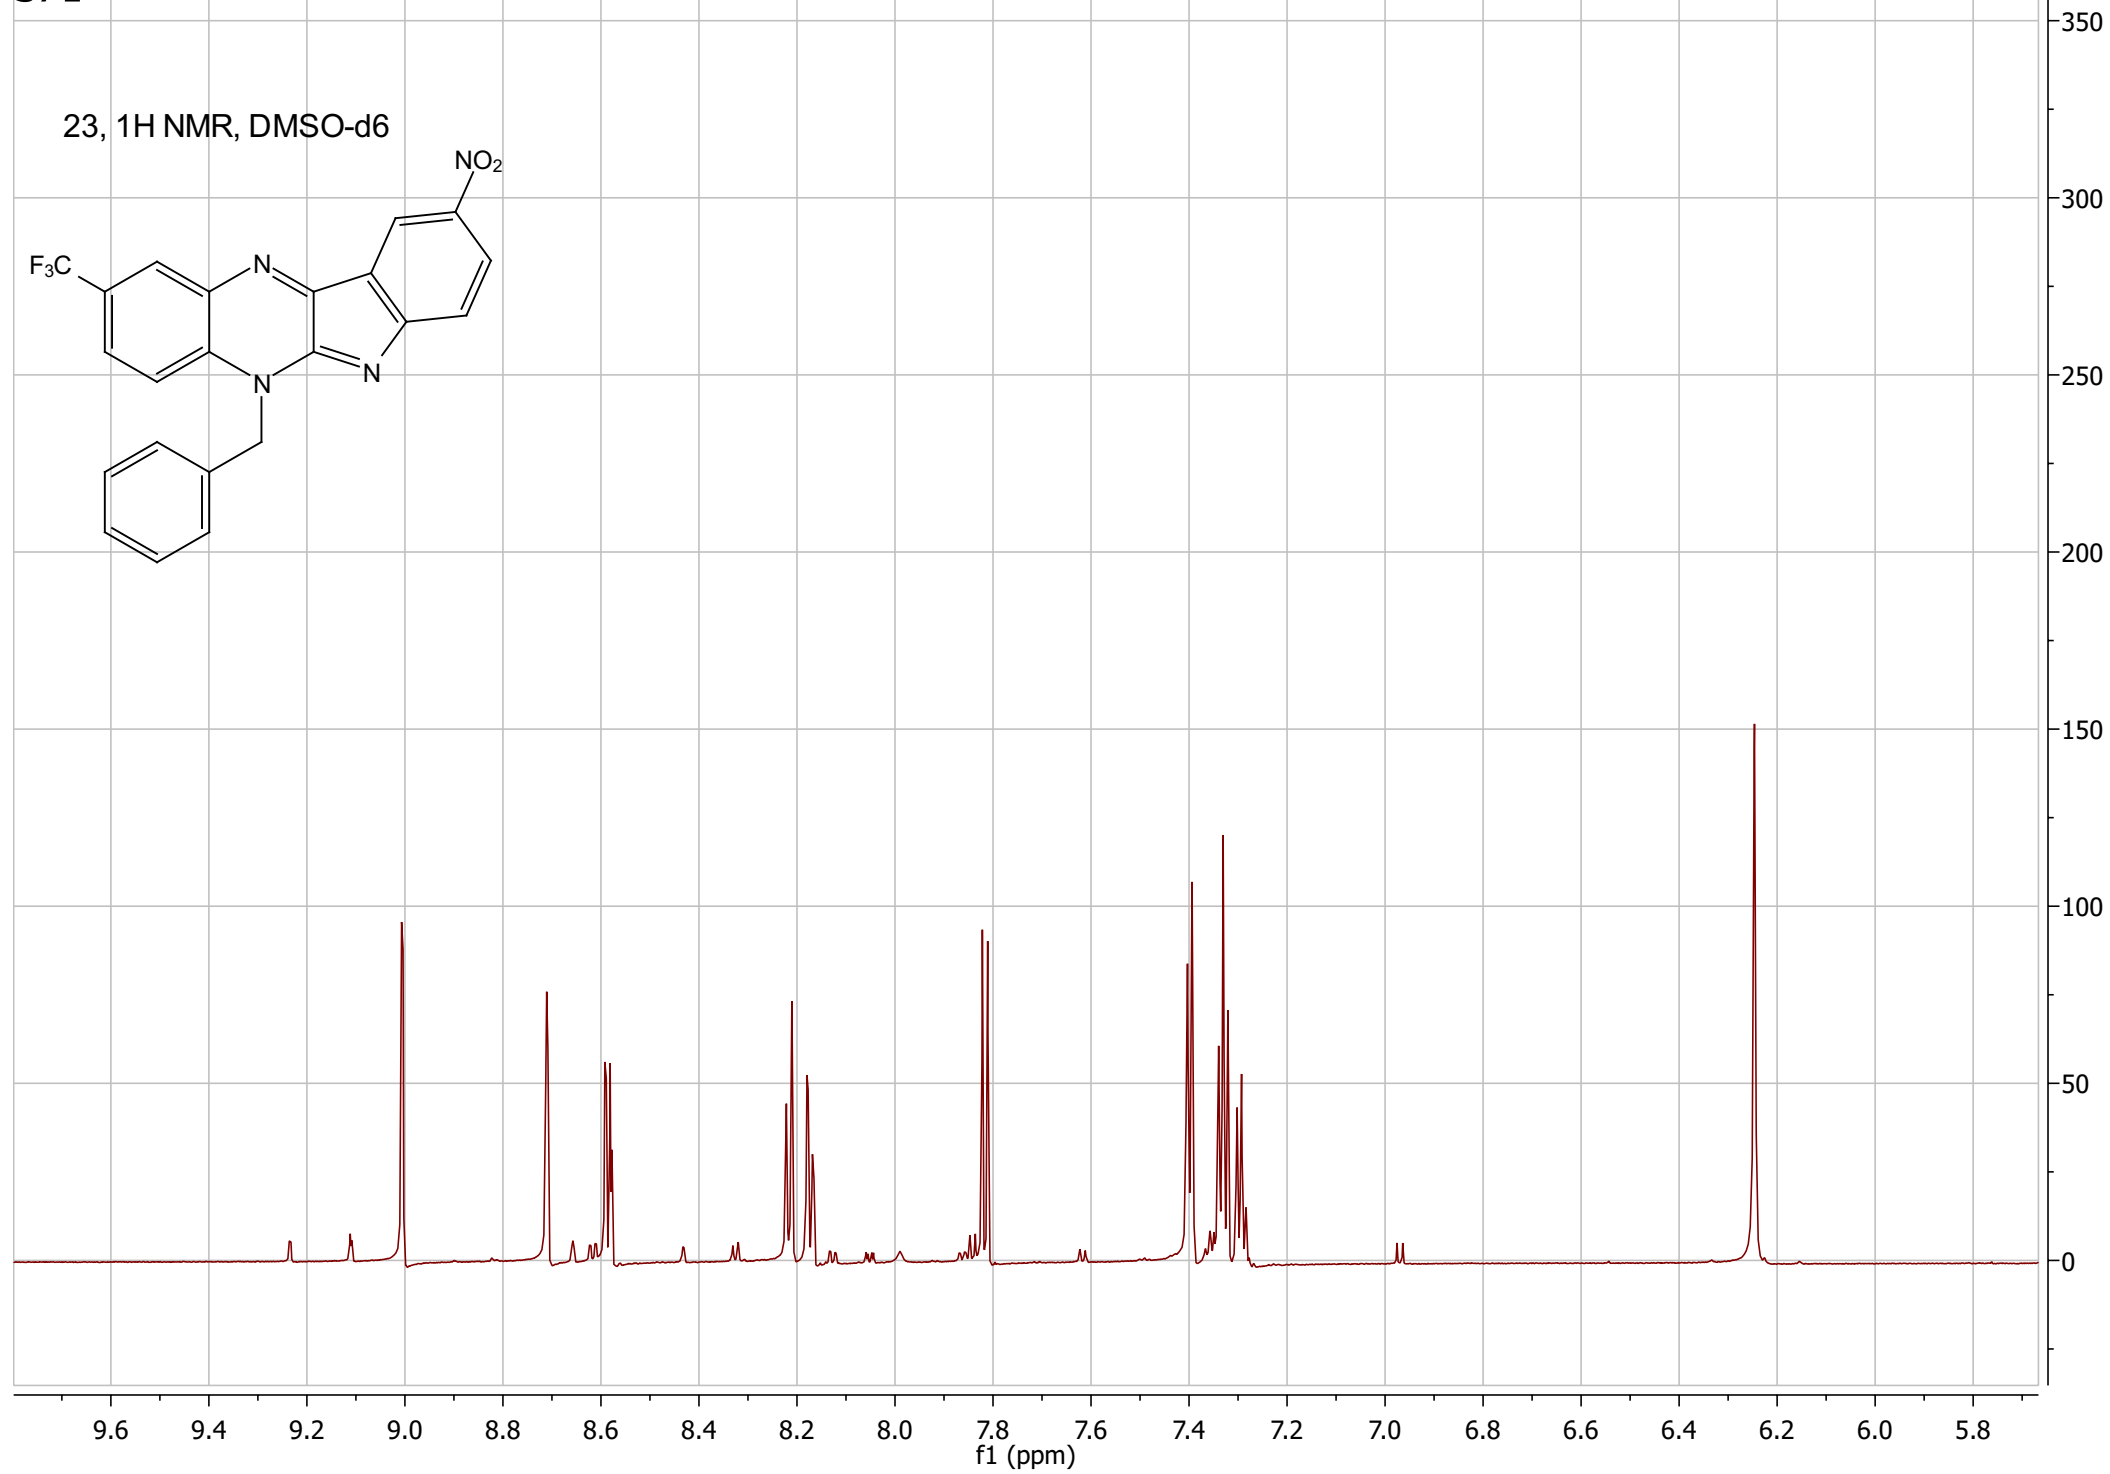

S72

23, <sup>13</sup>C NMR, DMSO-d<sub>6</sub>

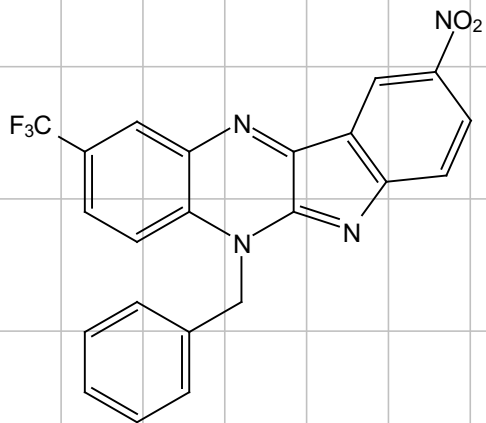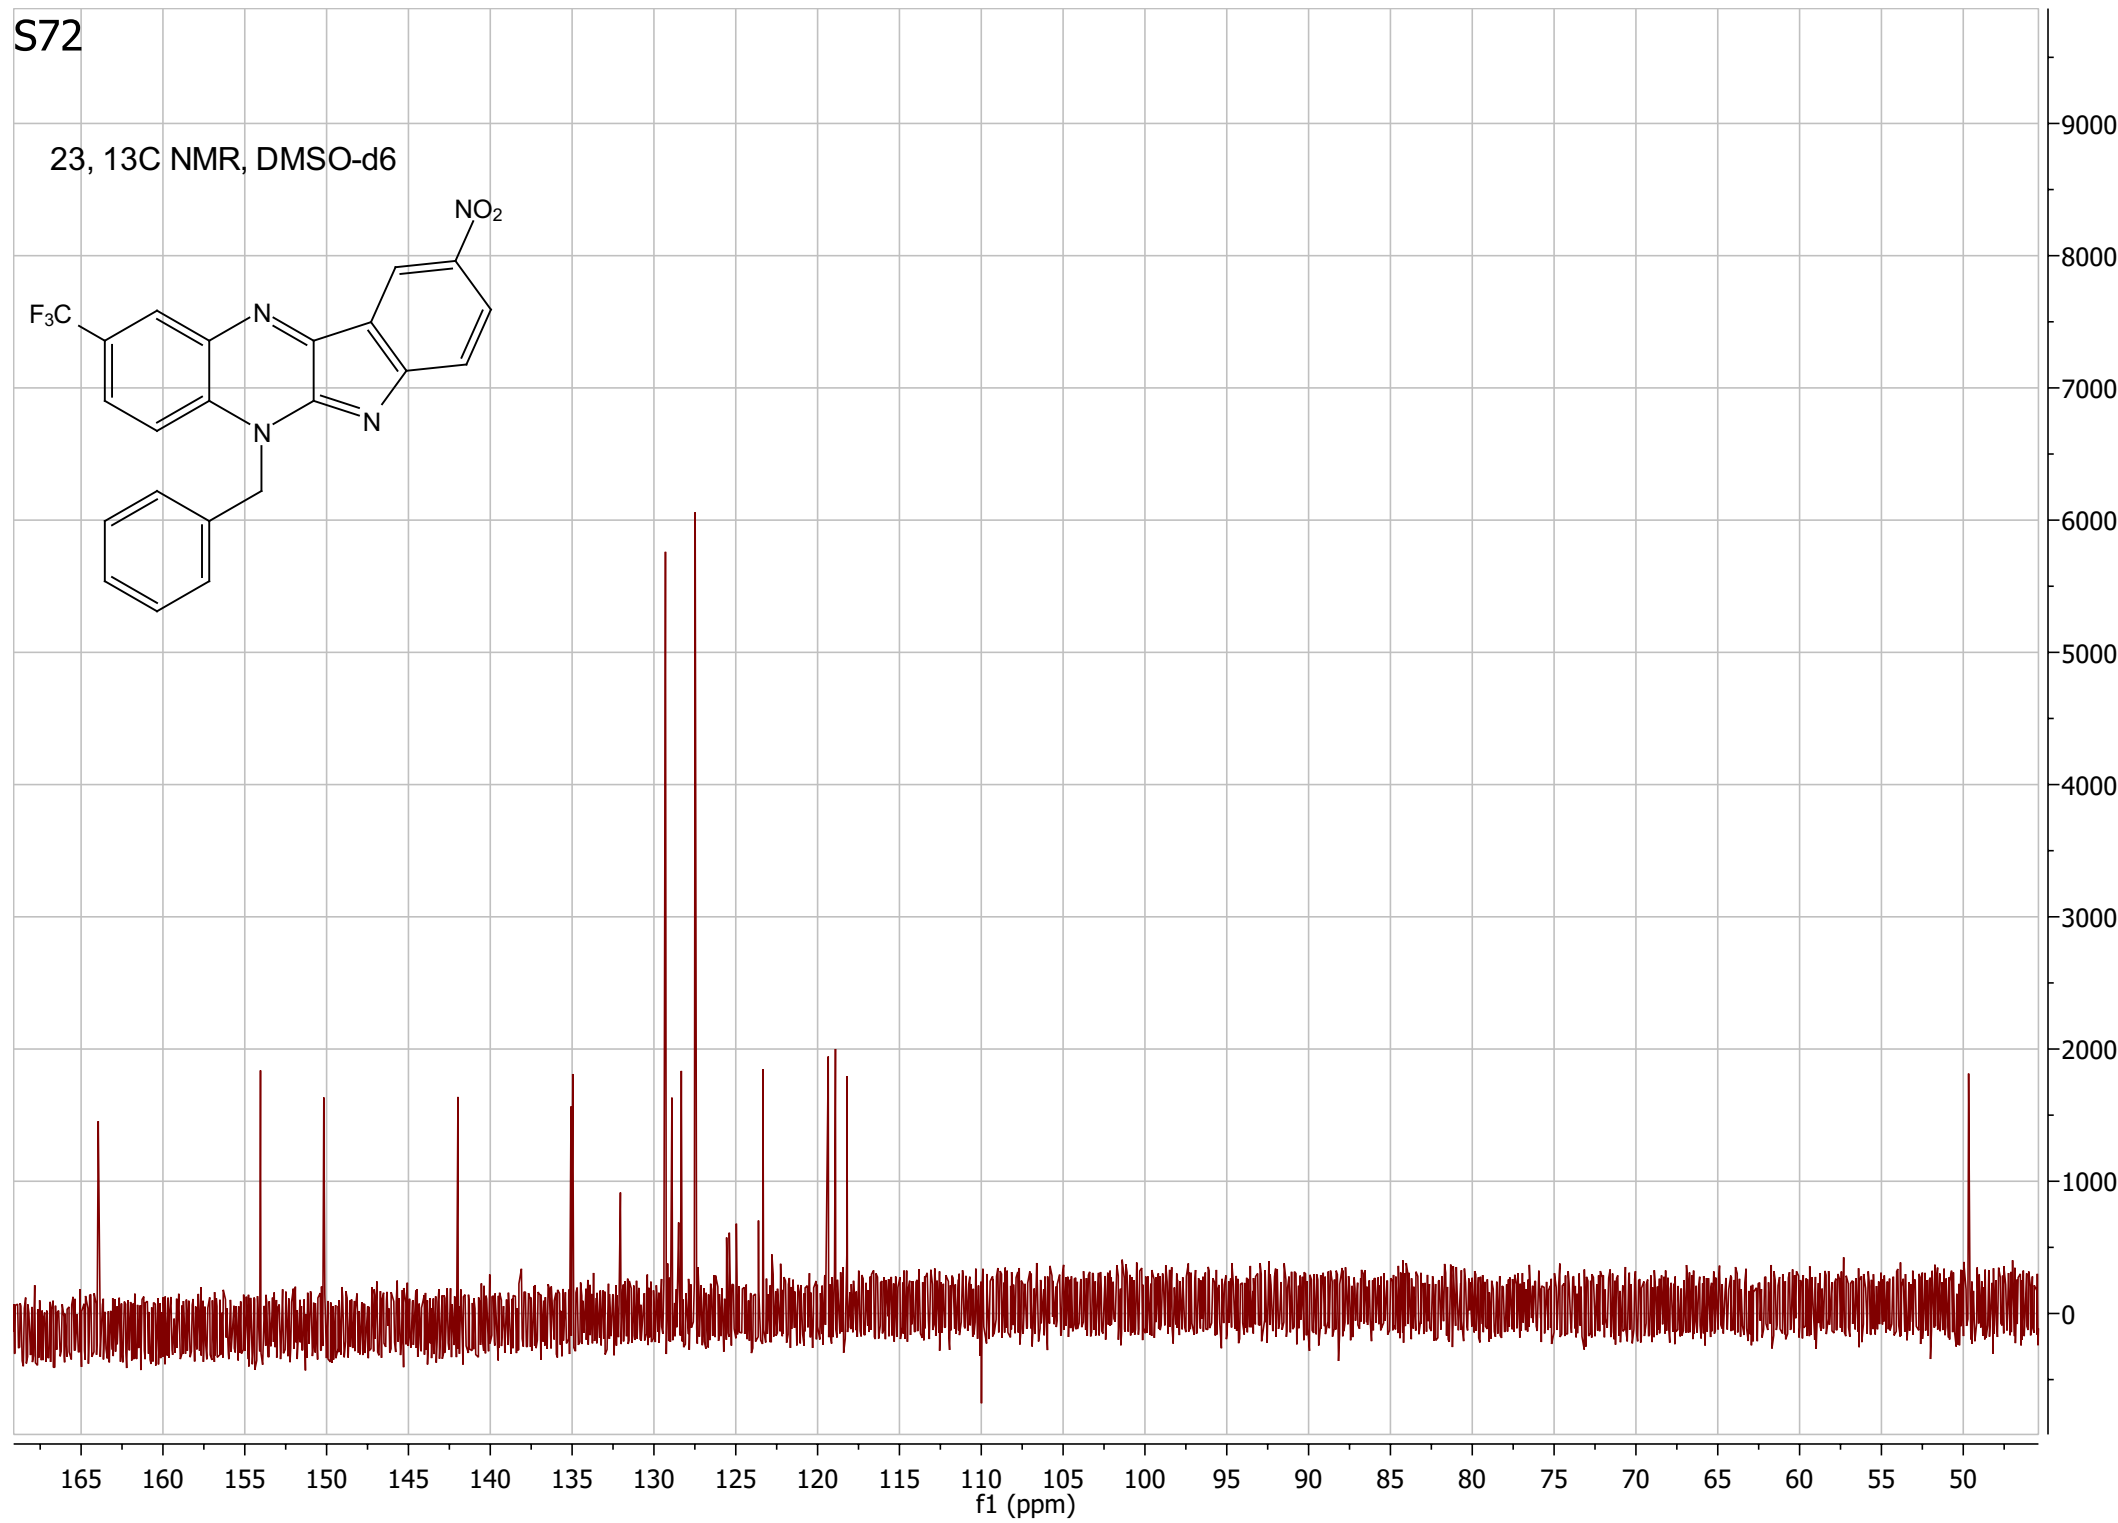

Supplement: NIHMS861677-supplement-SI_file.pdf [file NIHMS861677-supplement-SI_file.pdf]
